# Supplementary material for: Network Pharmacology of Ginseng (Part II): The Differential Effects of Red Ginseng and Ginsenoside Rg5 in Cancer and Heart Diseases as Determined by Transcriptomics
Source: Preprints.org preprint supplement (doi:10.20944/preprints202109.0258.v1), 2021-09-15

Sirtuins are class III histone deacetylase enzymes that use NAD<sup>+</sup> as a co-substrate for their enzymatic activities. In mammals, there are 7 sirtuin members (SIRT1-7), which play important roles in aging, metabolism, cancer, inflammation, DNA repair and cellular responses to stress.

WG 10000 ng/ml

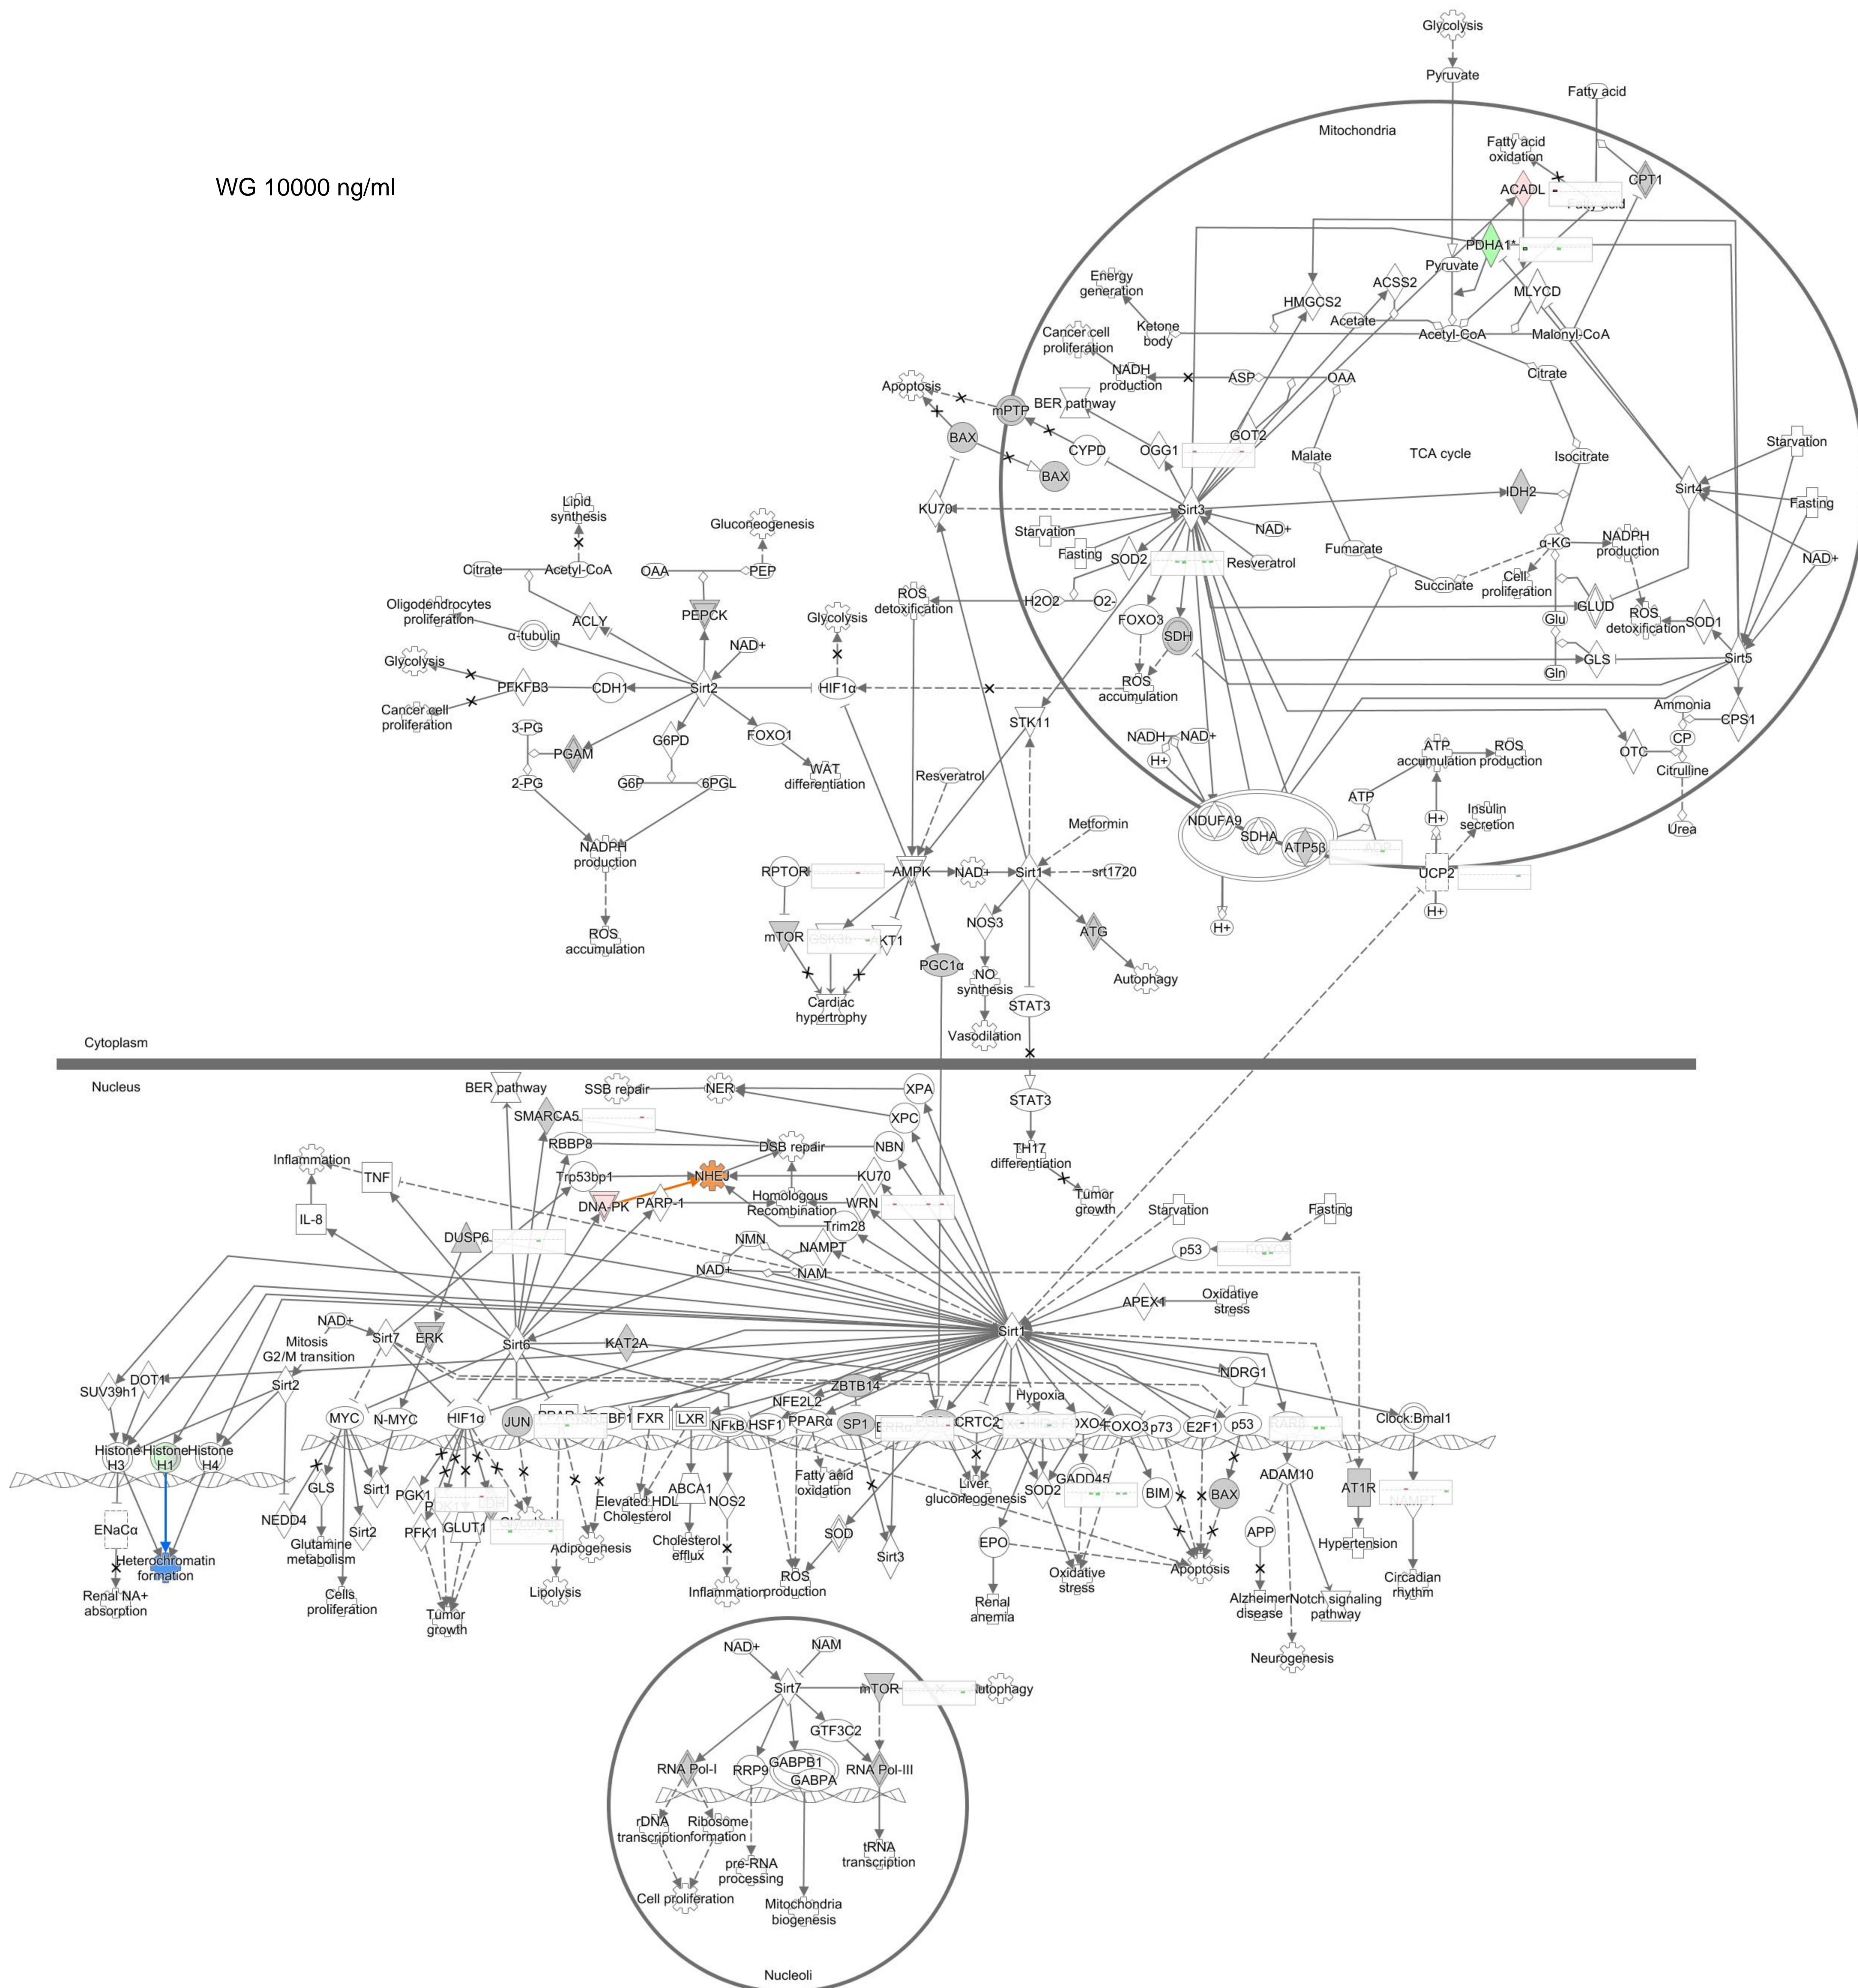



Sirtuins are class III histone deacetylase enzymes that use NAD<sup>+</sup> as a co-substrate for their enzymatic activities. In mammals, there are 7 sirtuin members (SIRT1-7), which play important roles in aging, metabolism, cancer, inflammation, DNA repair and cellular responses to stress.

HRG80 10000 ng/ml

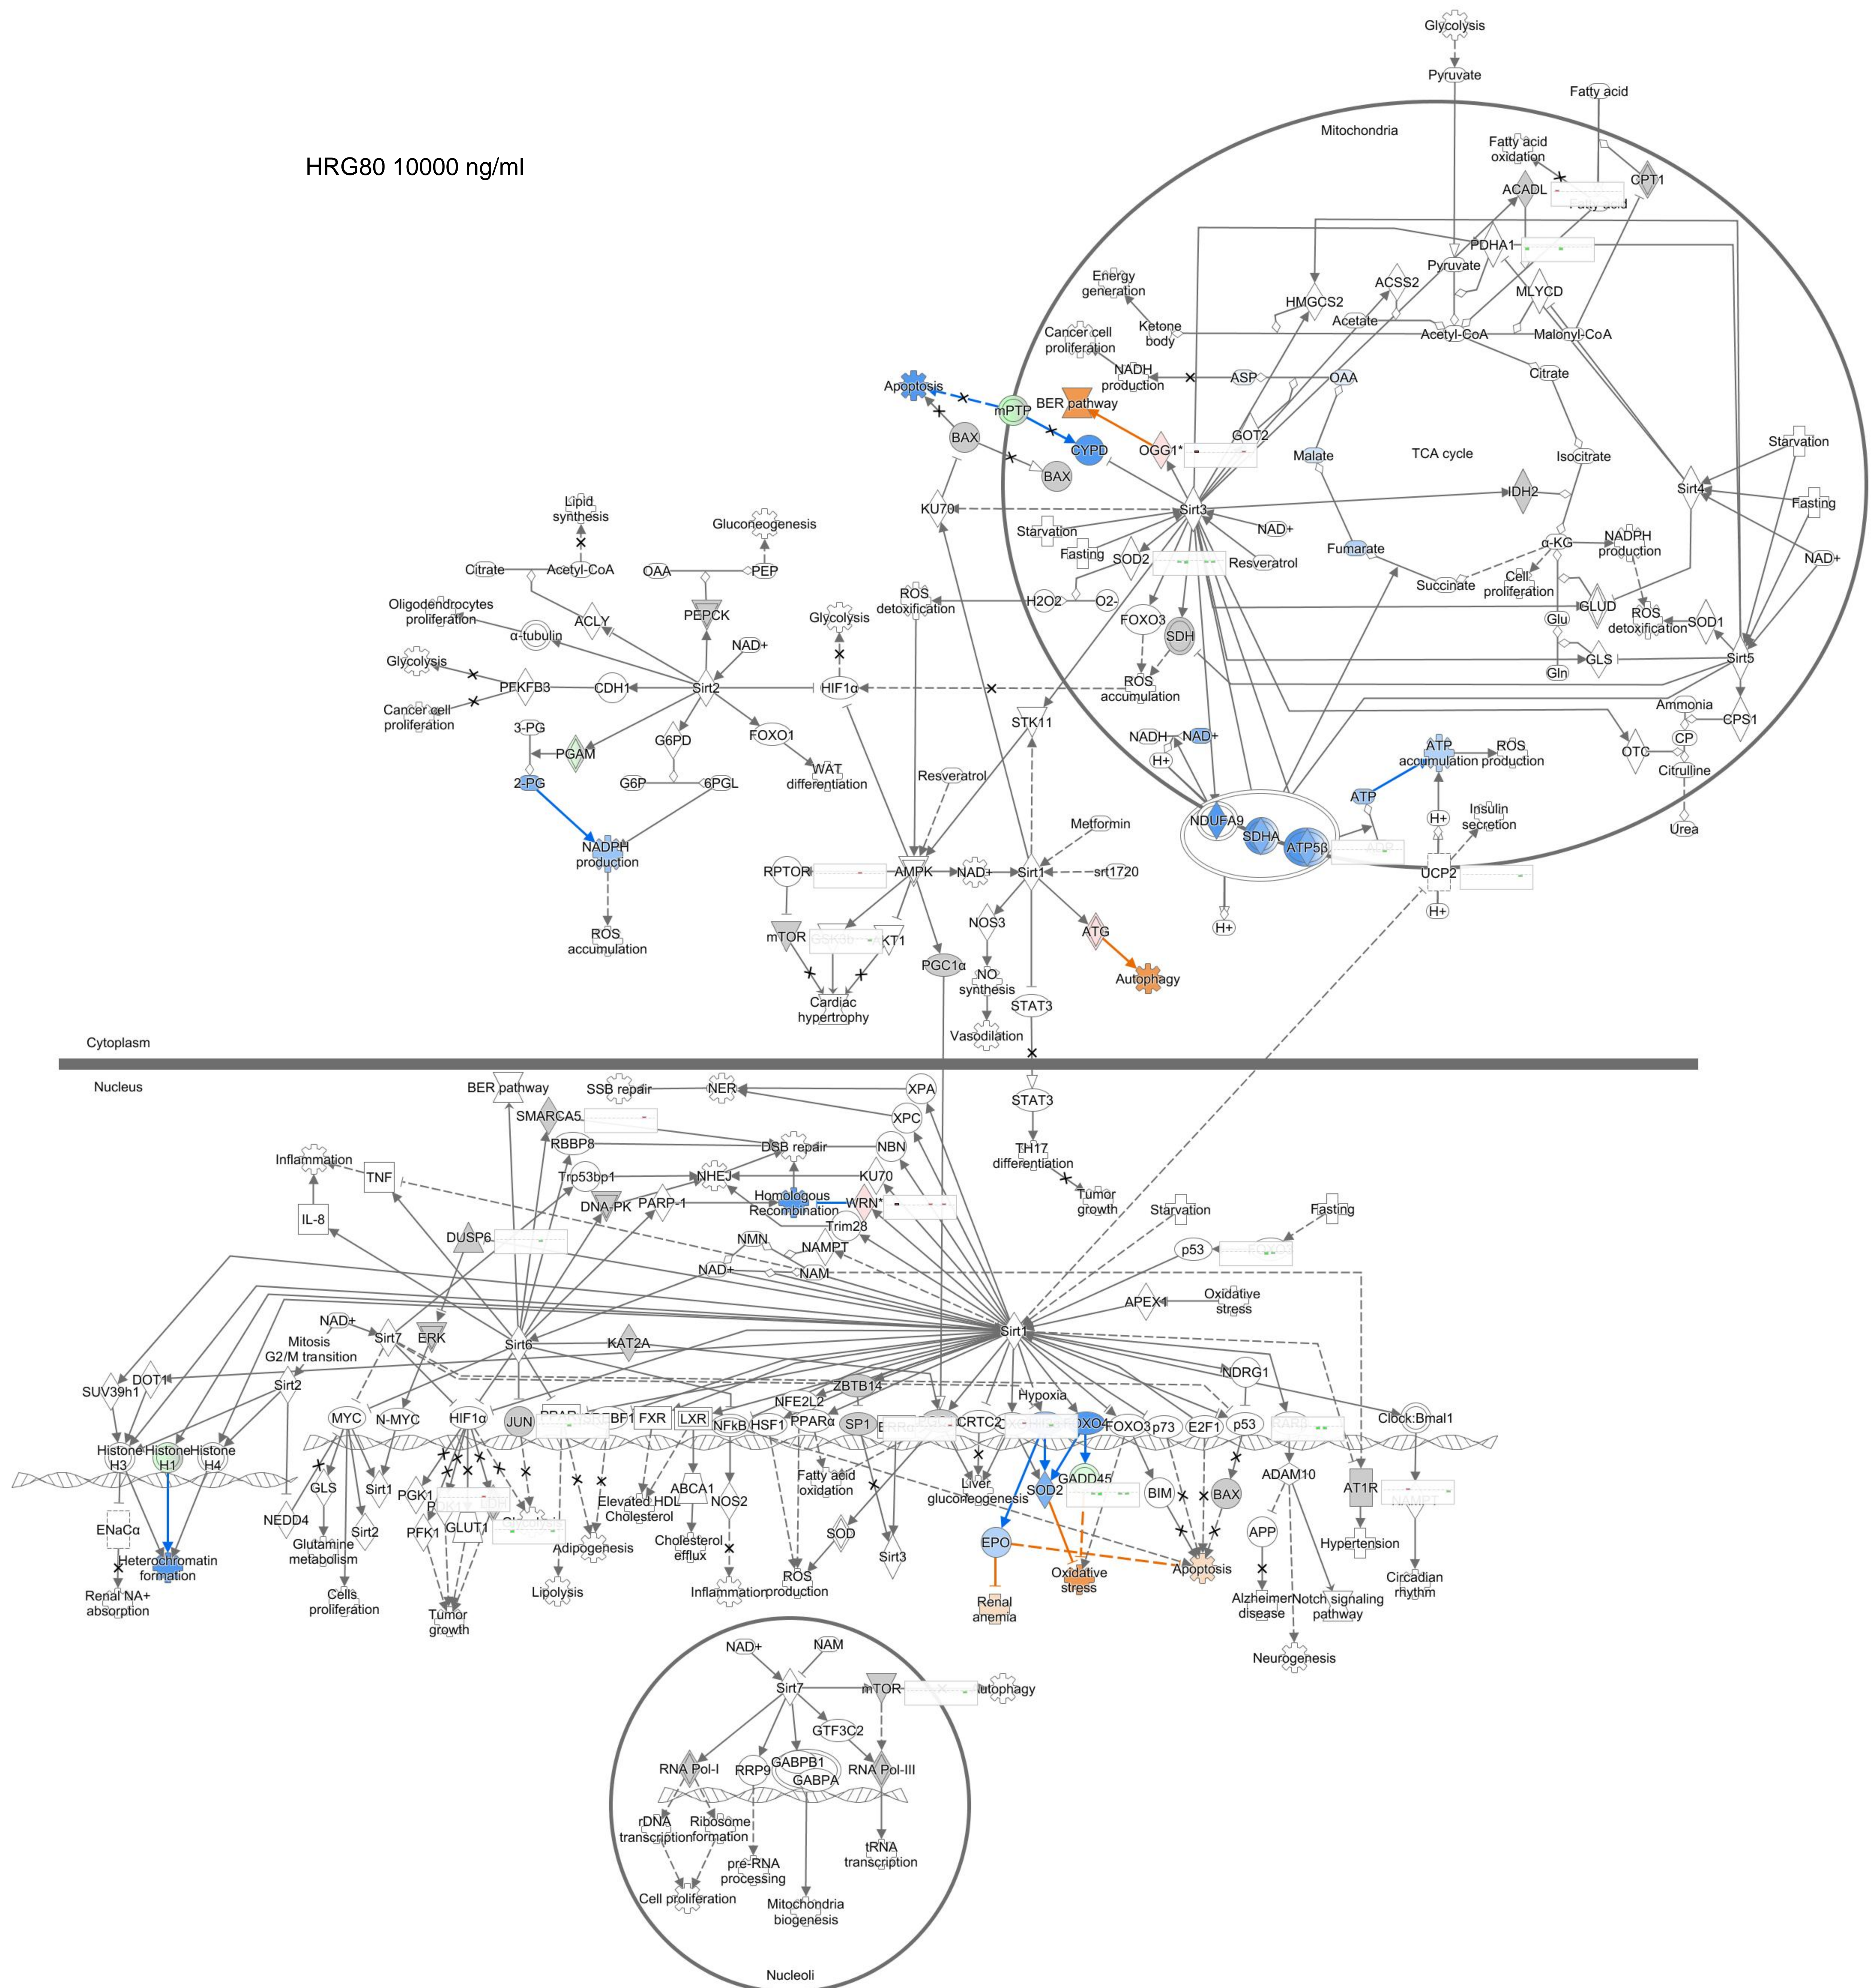



Sirtuins are class III histone deacetylase enzymes that use NAD<sup>+</sup> as a co-substrate for their enzymatic activities. In mammals, there are 7 sirtuin members (SIRT1-7), which play important roles in aging, metabolism, cancer, inflammation, DNA repair and cellular responses to stress.

HRG80 1000 ng/ml

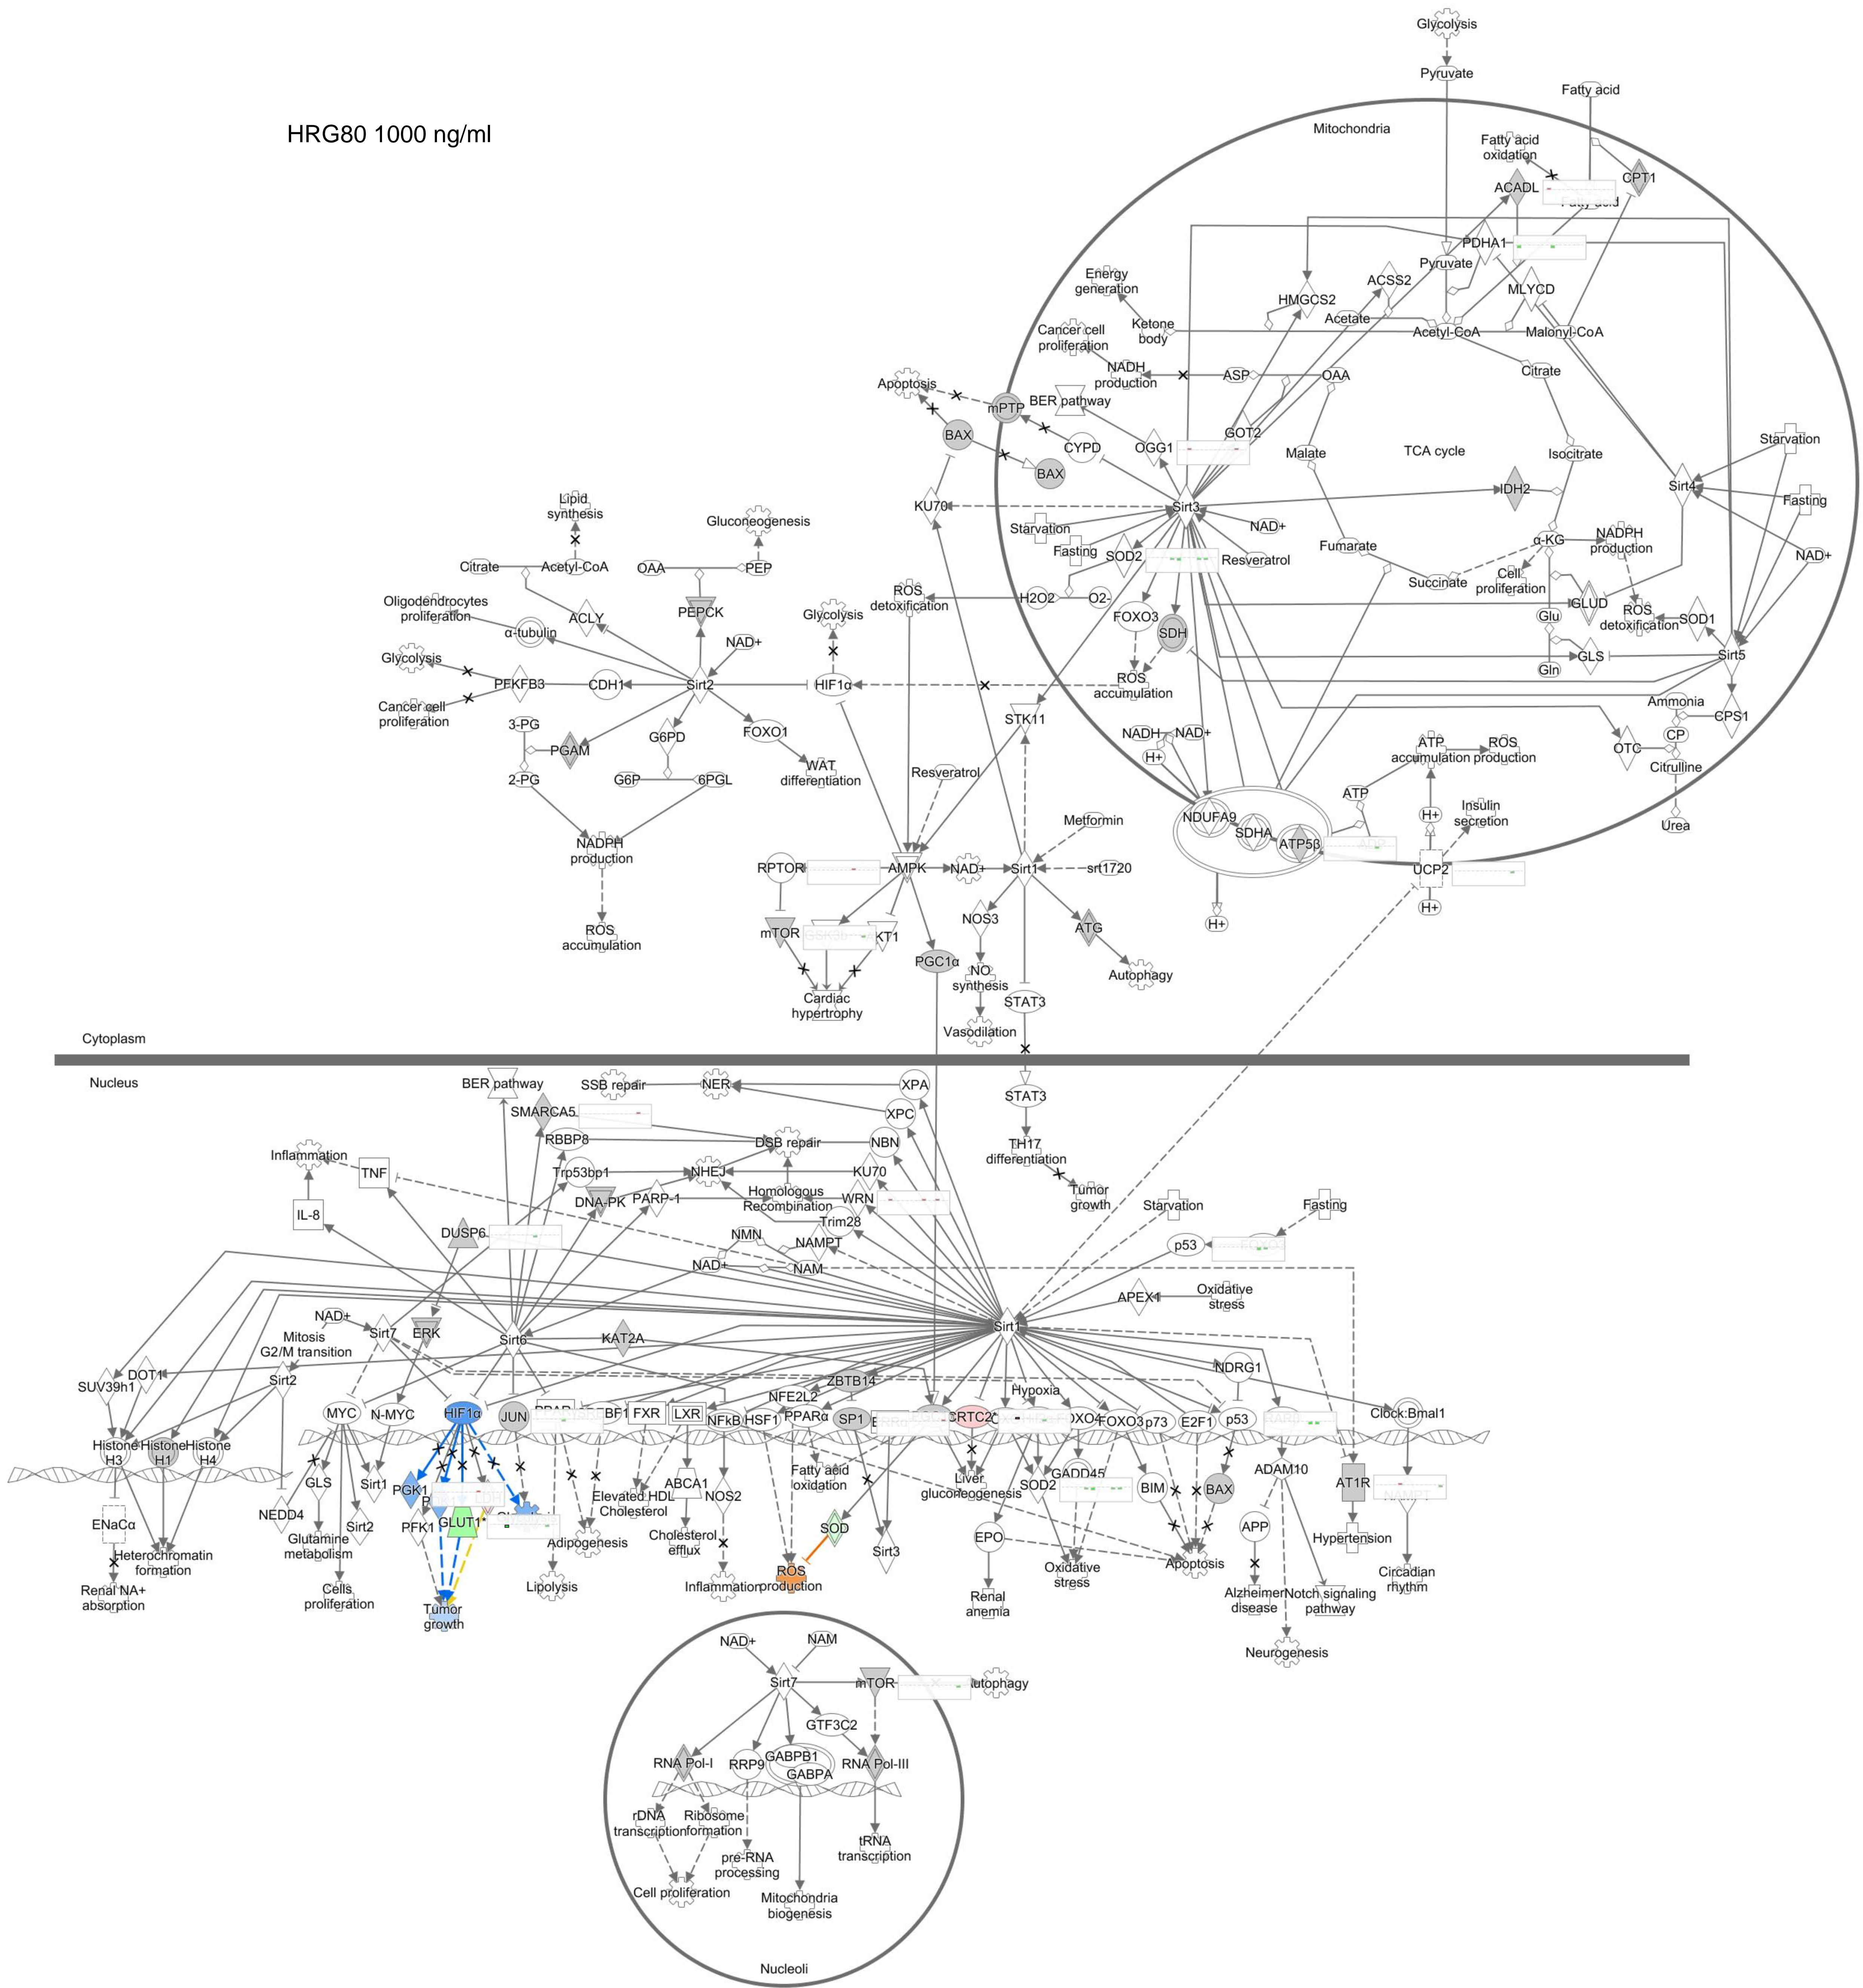



Sirtuins are class III histone deacetylase enzymes that use NAD<sup>+</sup> as a co-substrate for their enzymatic activities. In mammals, there are 7 sirtuin members (SIRT1-7), which play important roles in aging, metabolism, cancer, inflammation, DNA repair and cellular responses to stress.

HRG80 100 ng/ml

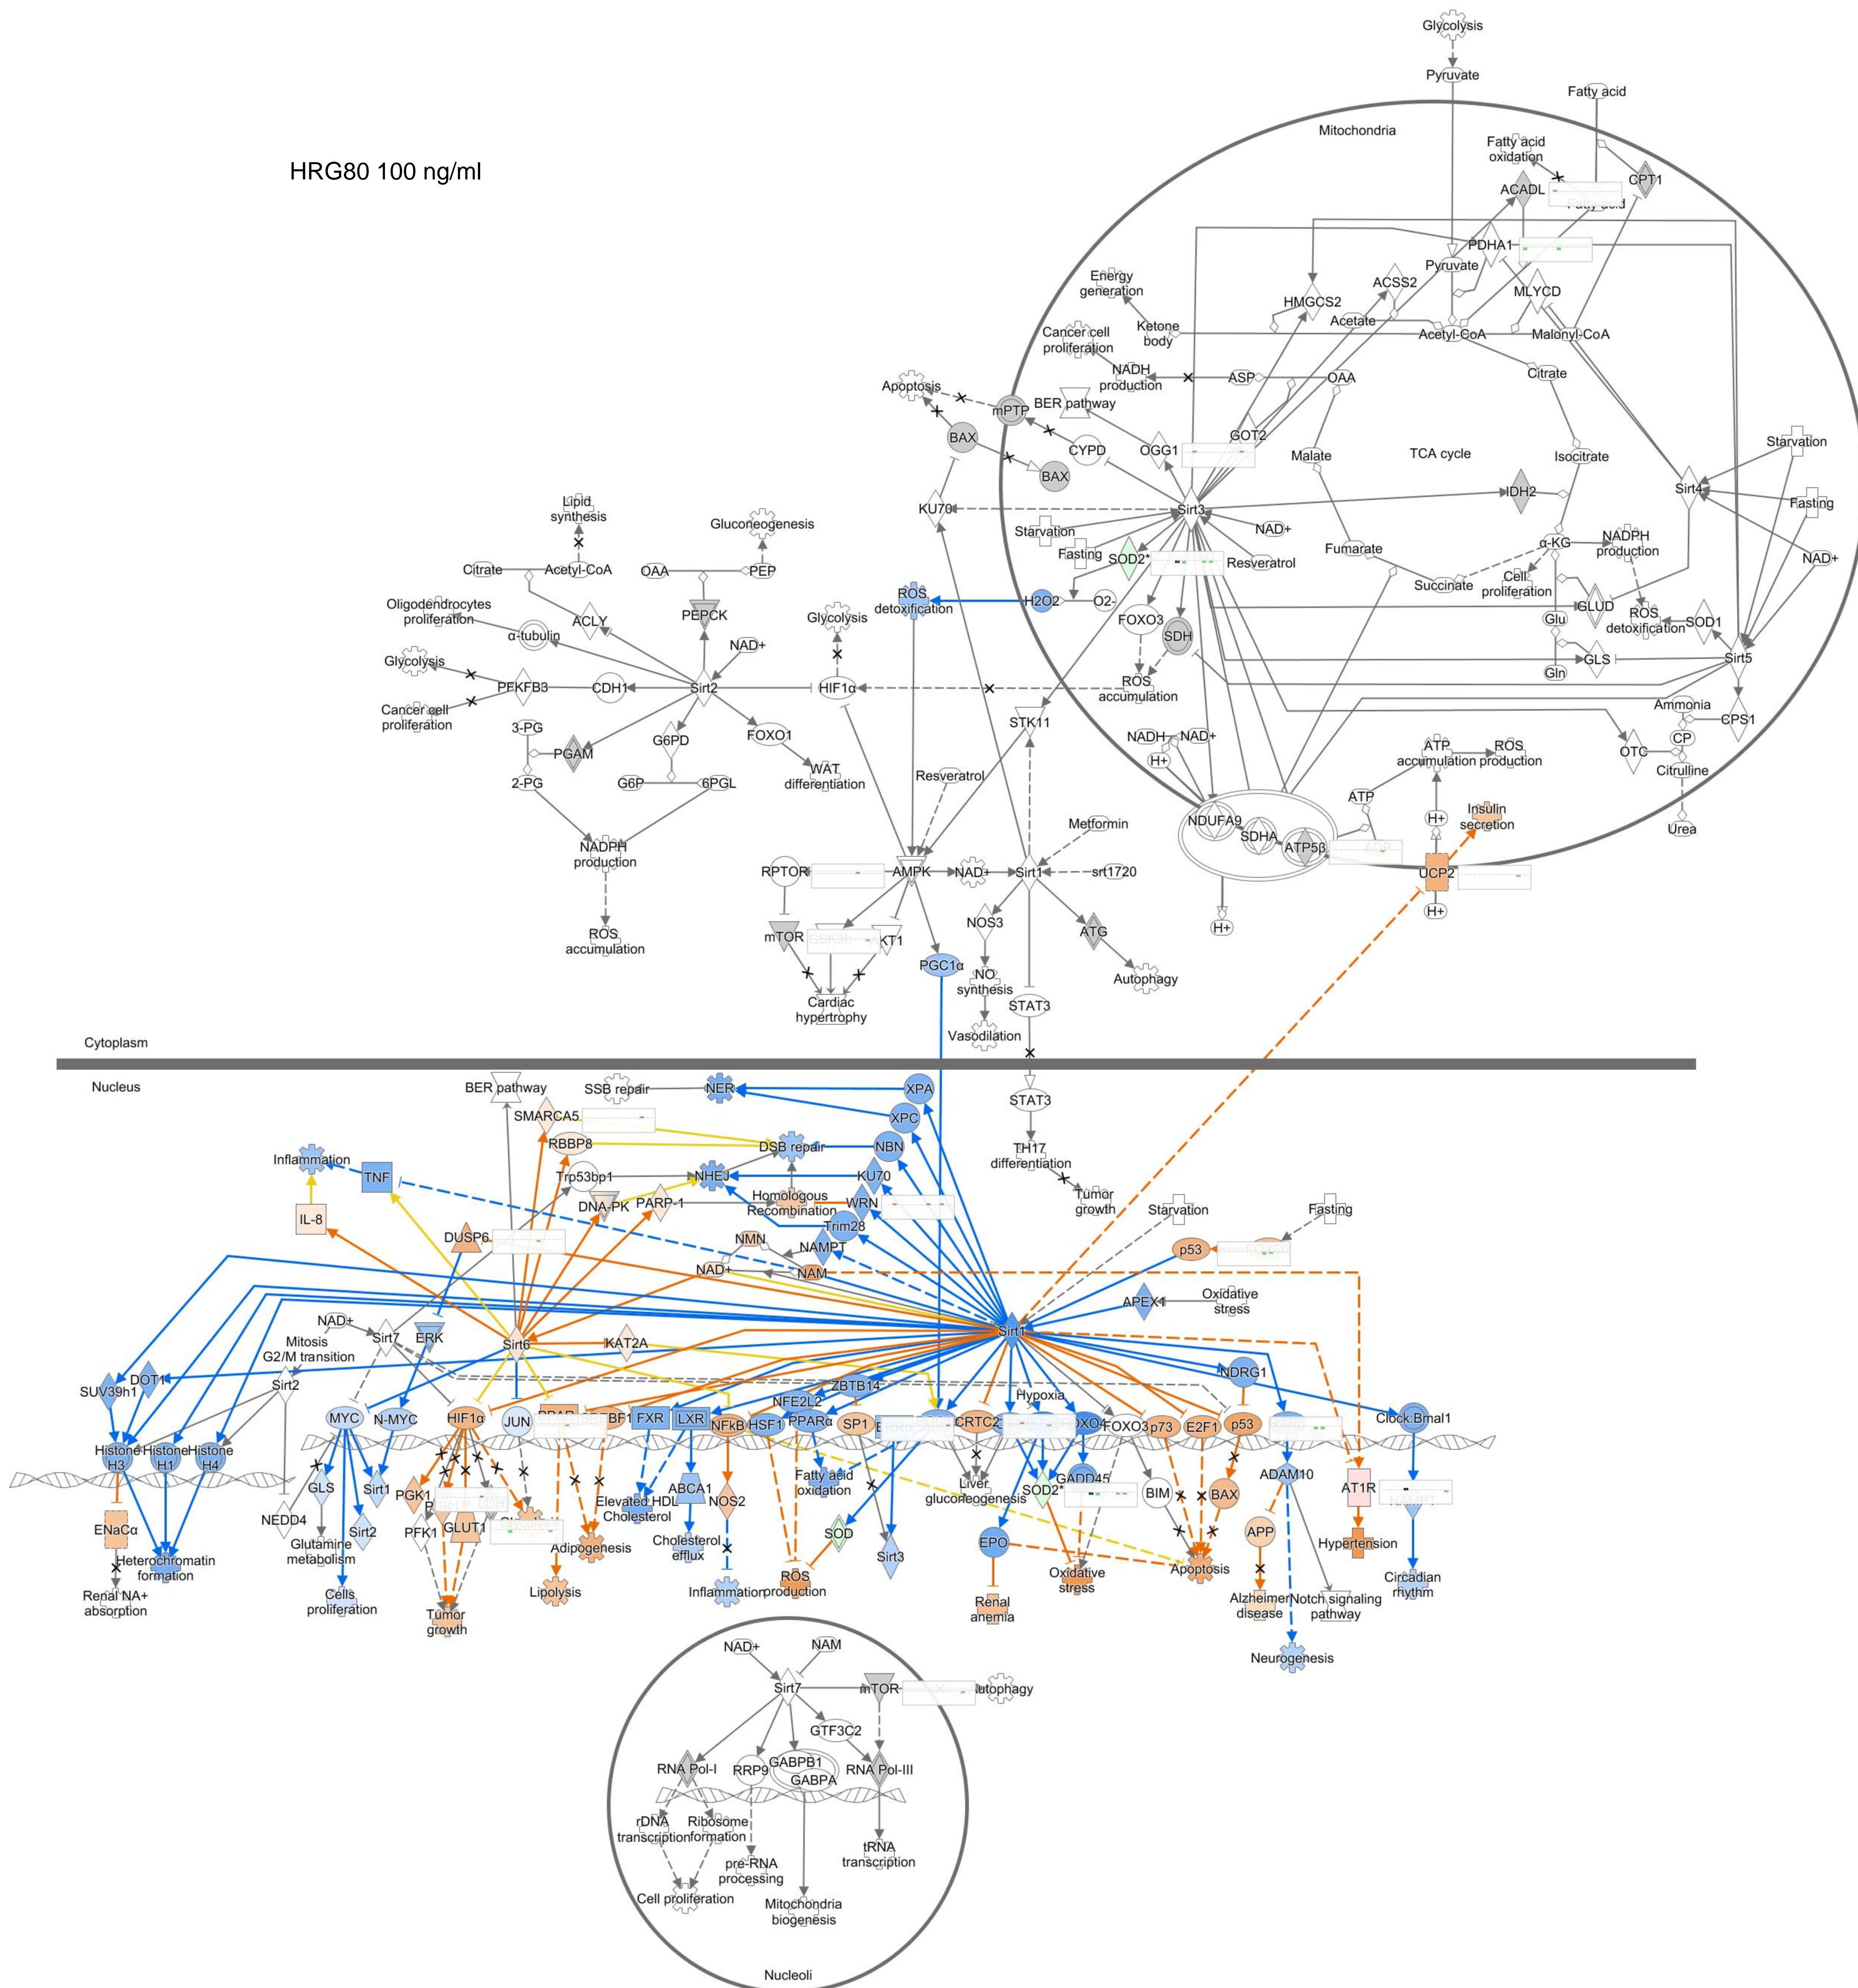



Sirtuins are class III histone deacetylase enzymes that use NAD<sup>+</sup> as a co-substrate for their enzymatic activities. In mammals, there are 7 sirtuin members (SIRT1-7), which play important roles in aging, metabolism, cancer, inflammation, DNA repair and cellular responses to stress.

HRG80 10 ng/ml

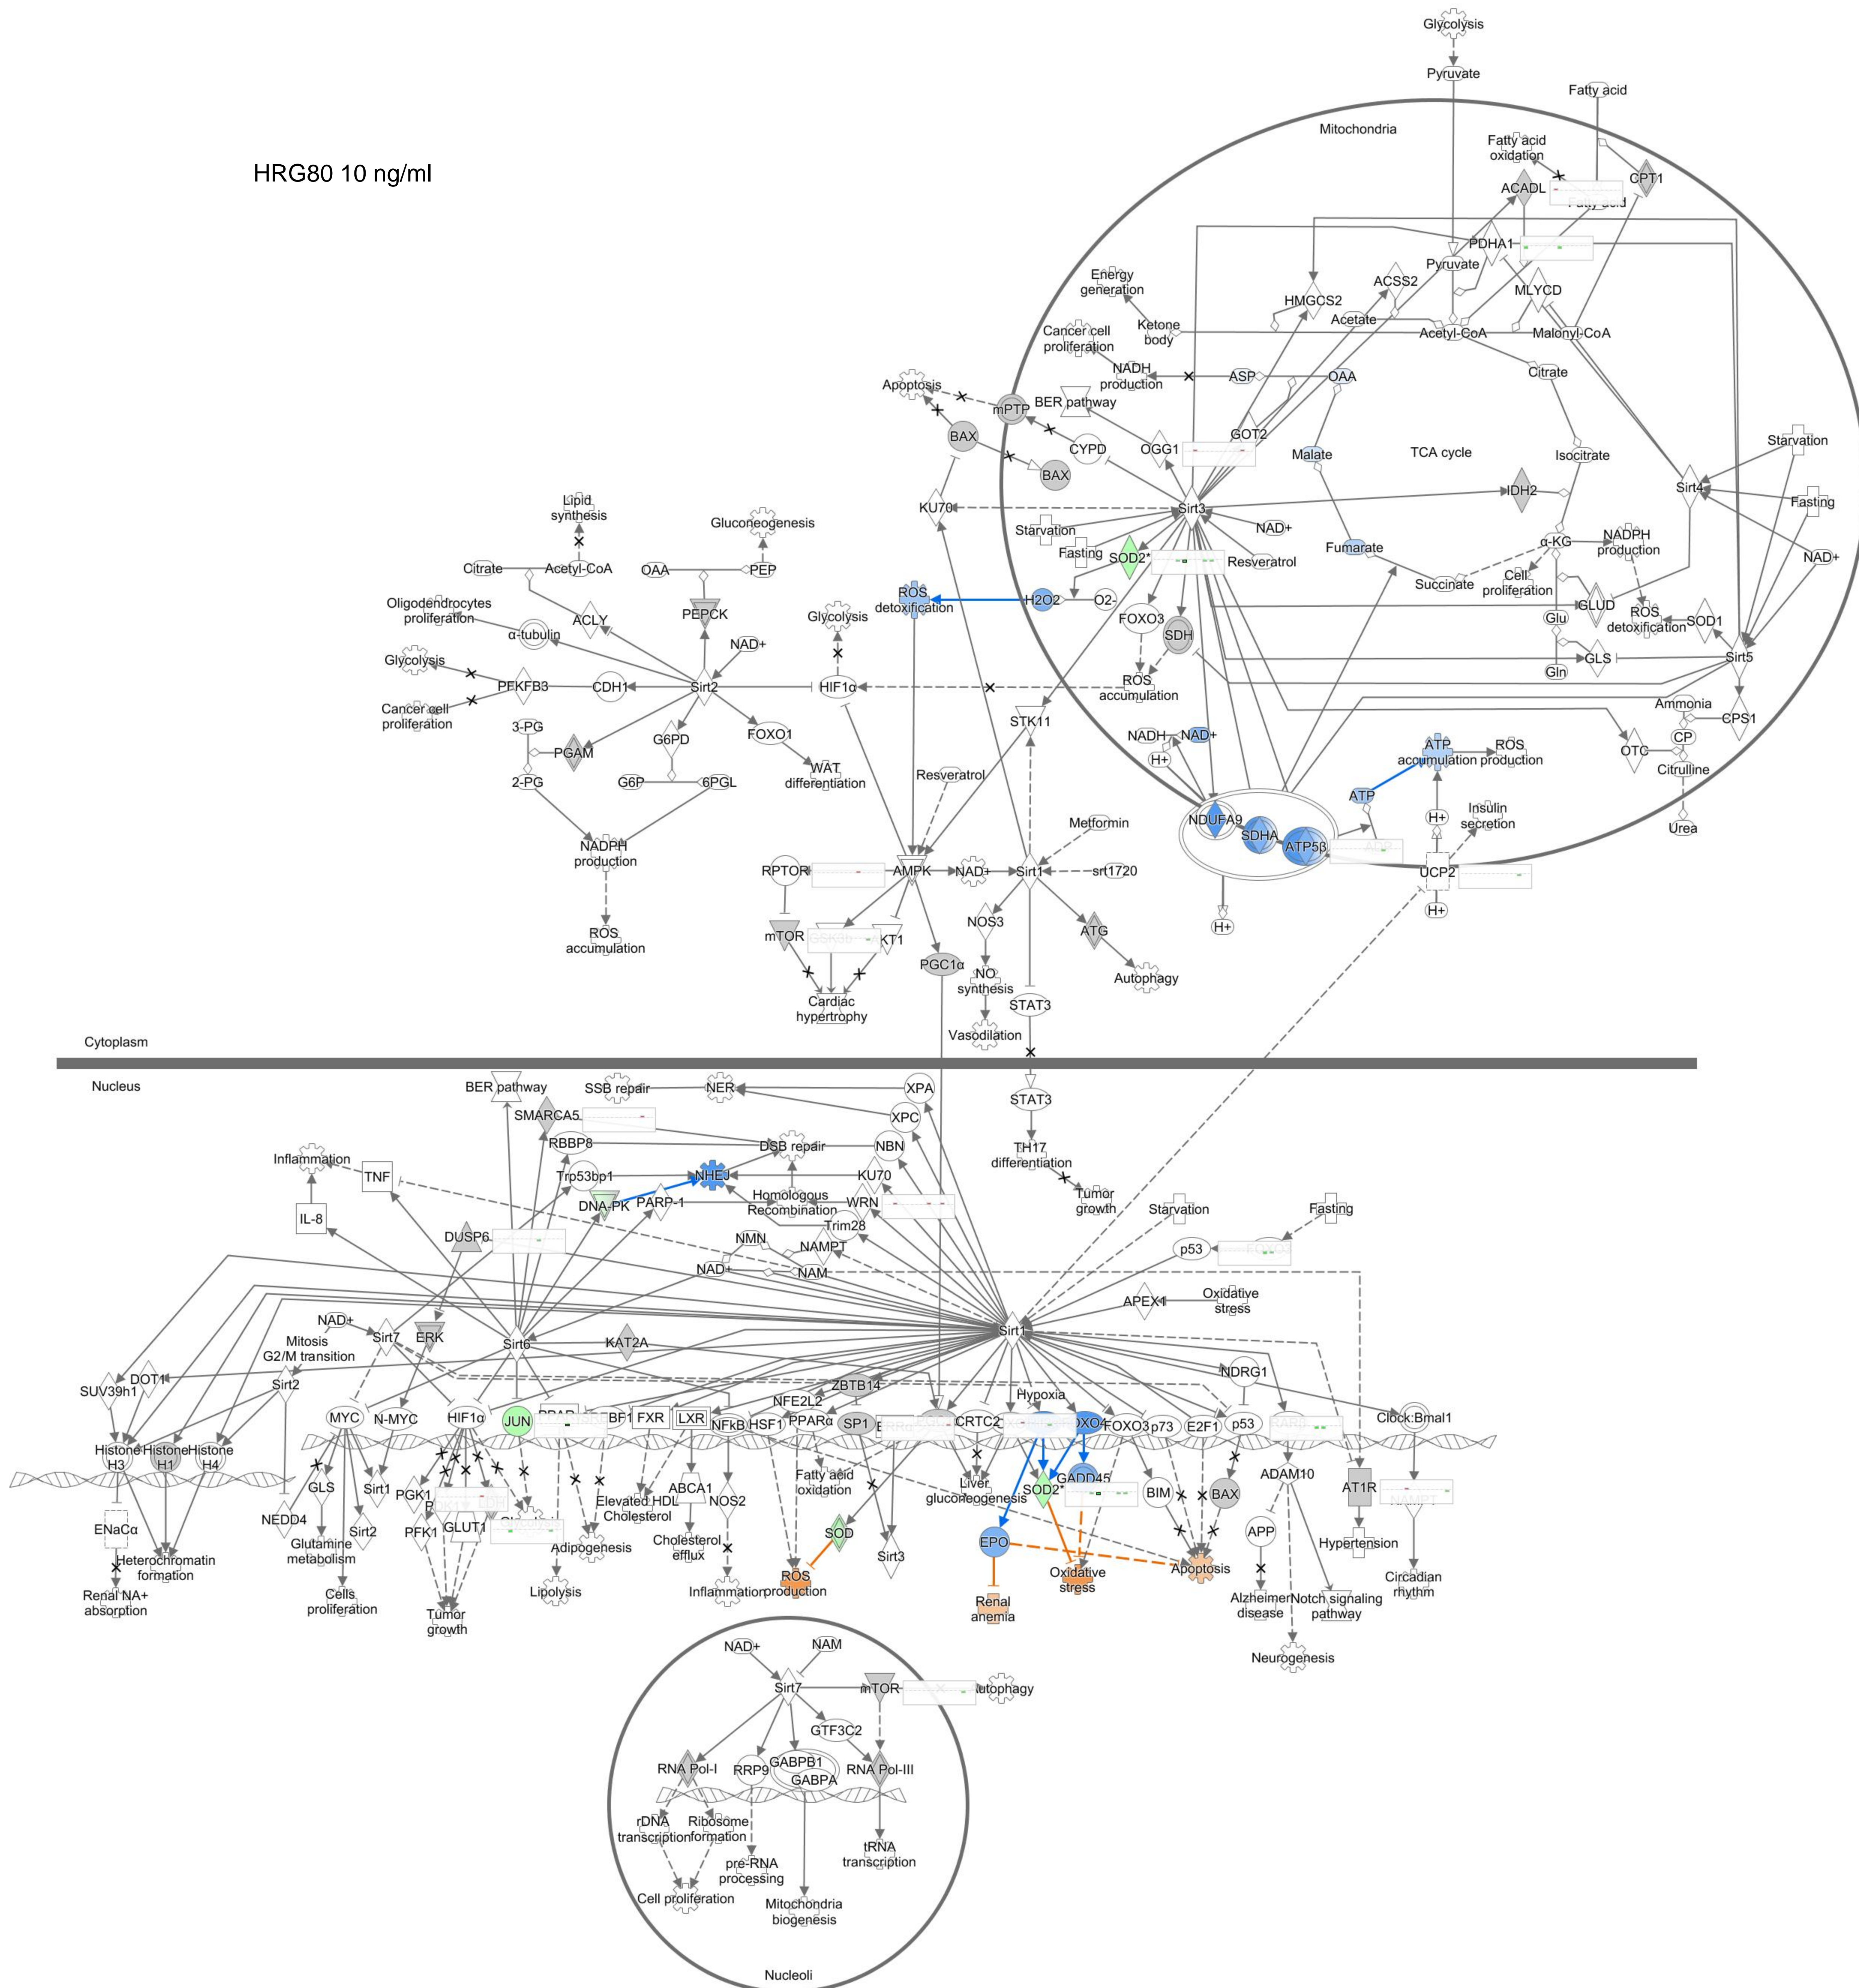



Sirtuins are class III histone deacetylase enzymes that use NAD<sup>+</sup> as a co-substrate for their enzymatic activities. In mammals, there are 7 sirtuin members (SIRT1-7), which play important roles in aging, metabolism, cancer, inflammation, DNA repair and cellular responses to stress.

HRG80 0.01 ng/ml

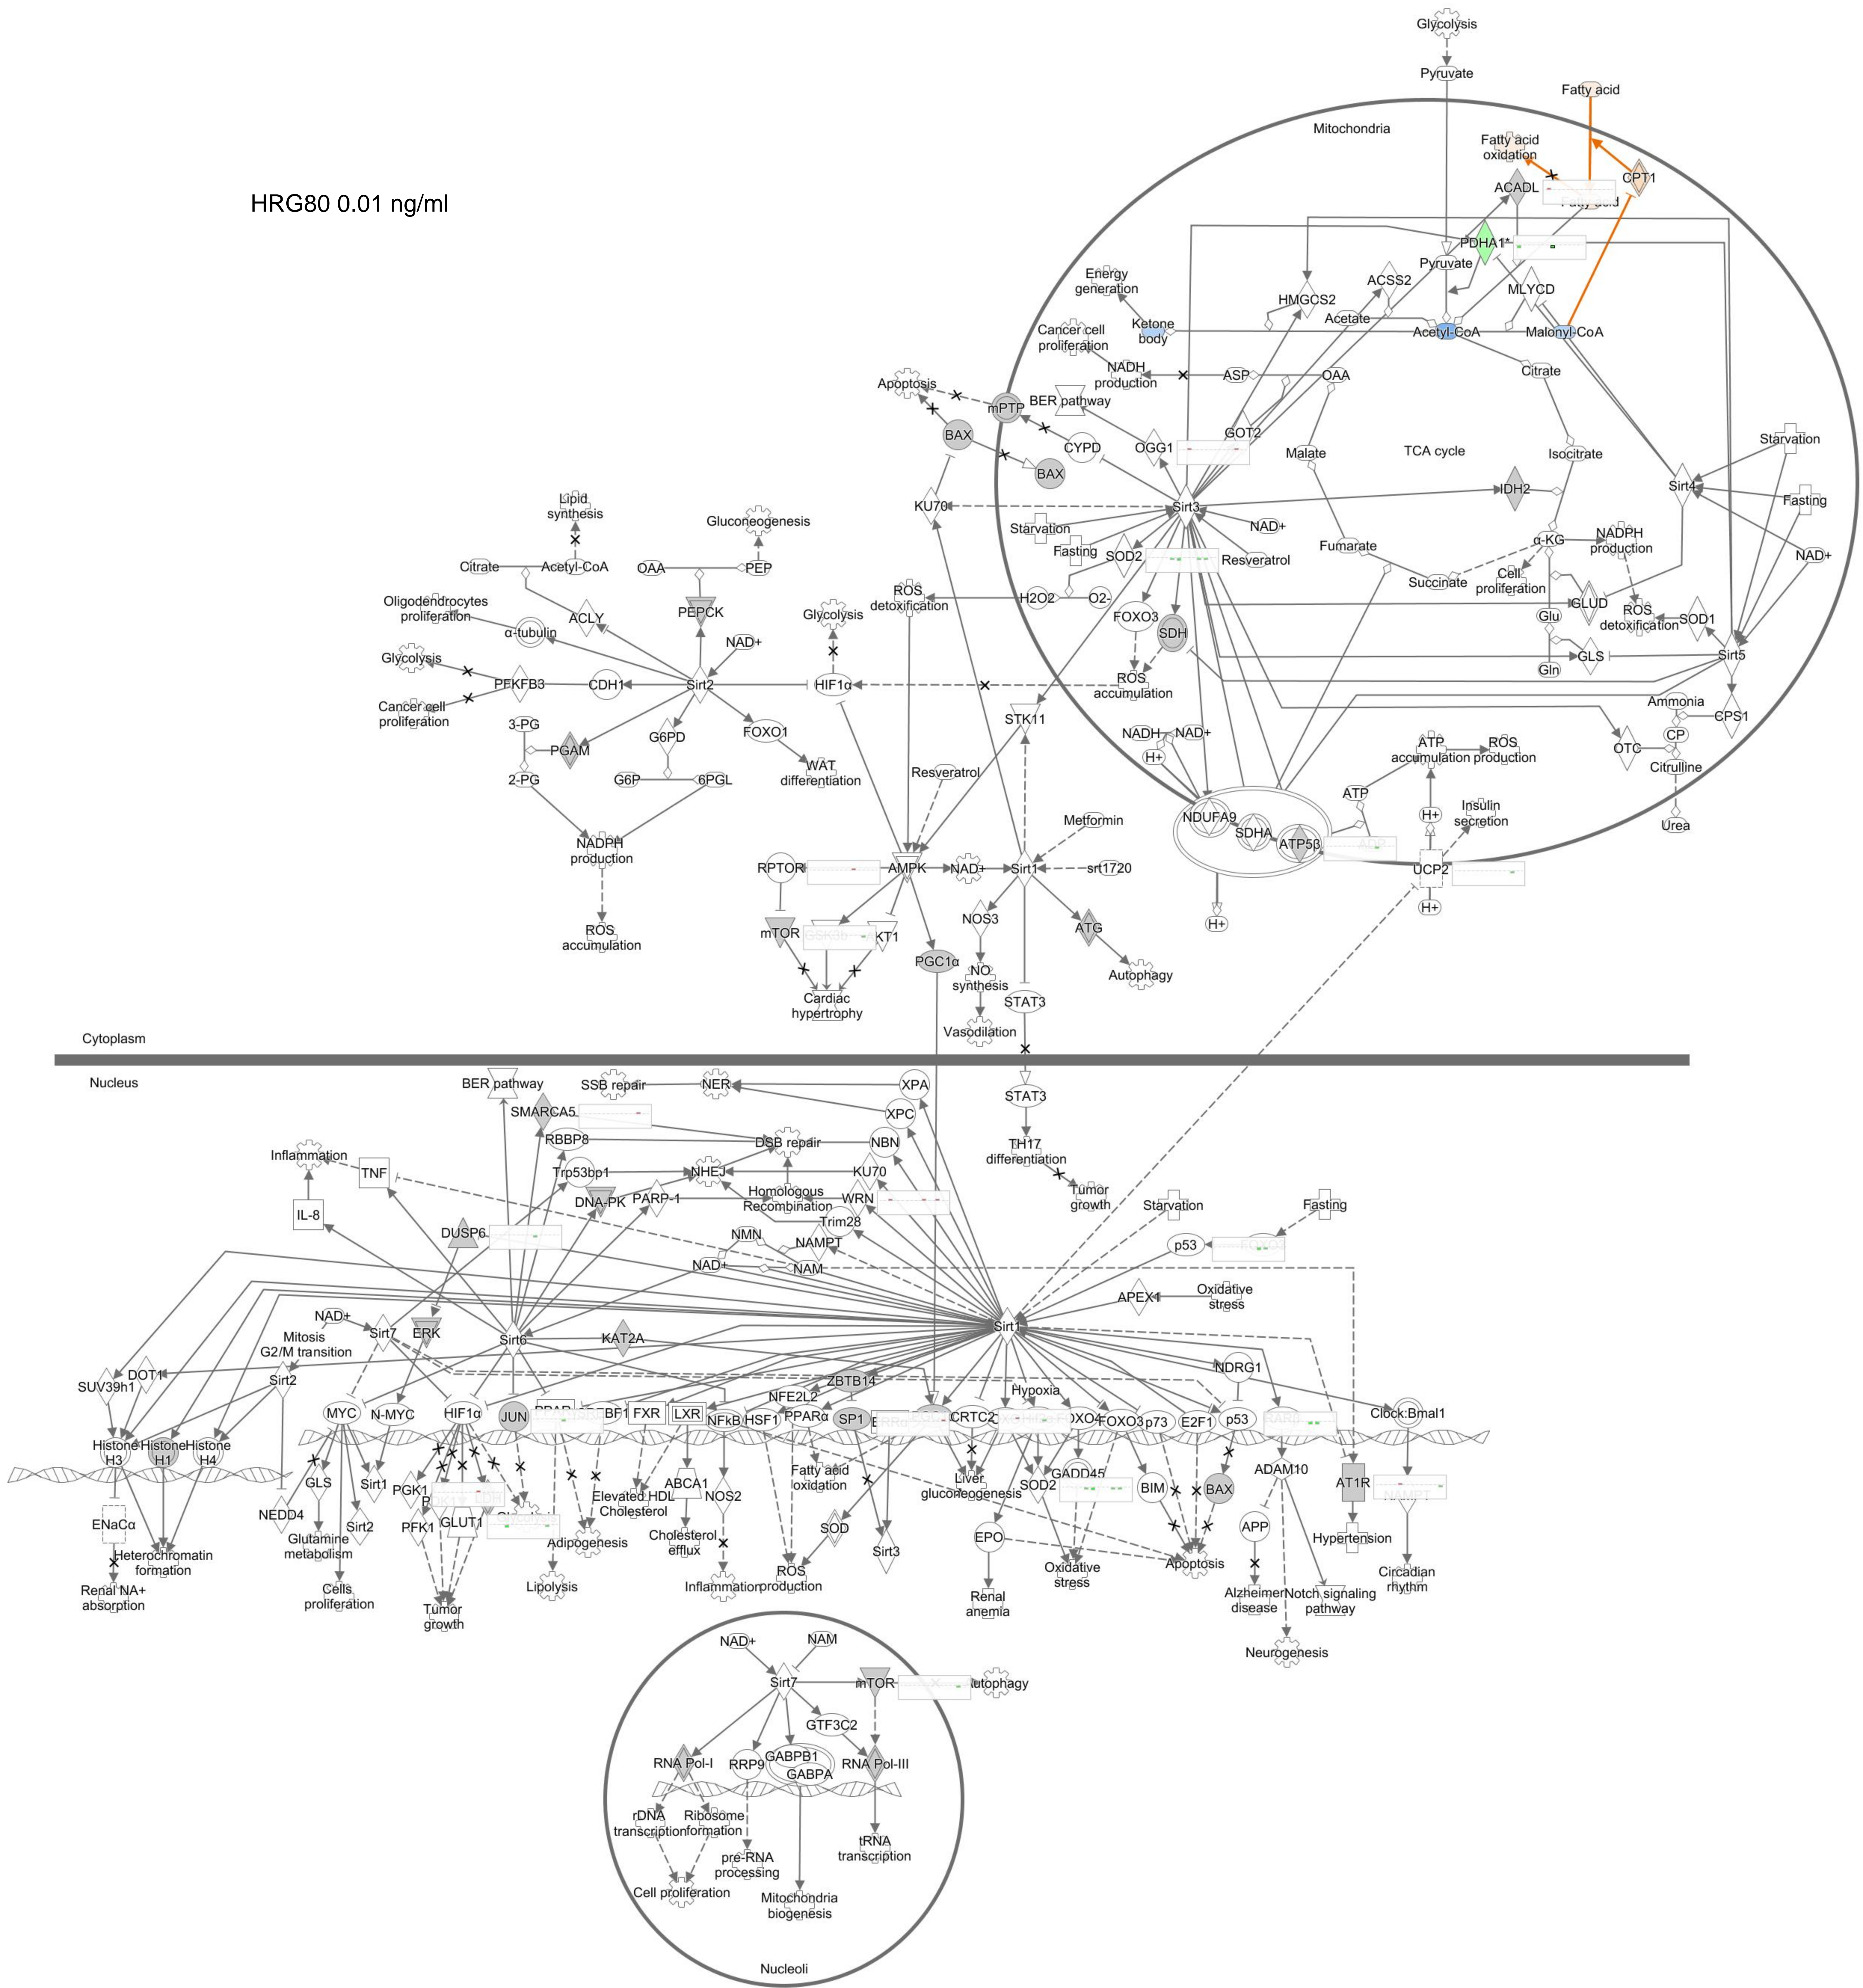



Sirtuins are class III histone deacetylase enzymes that use NAD<sup>+</sup> as a co-substrate for their enzymatic activities. In mammals, there are 7 sirtuin members (SIRT1-7), which play important roles in aging, metabolism, cancer, inflammation, DNA repair and cellular responses to stress.

Rb1 100 nM

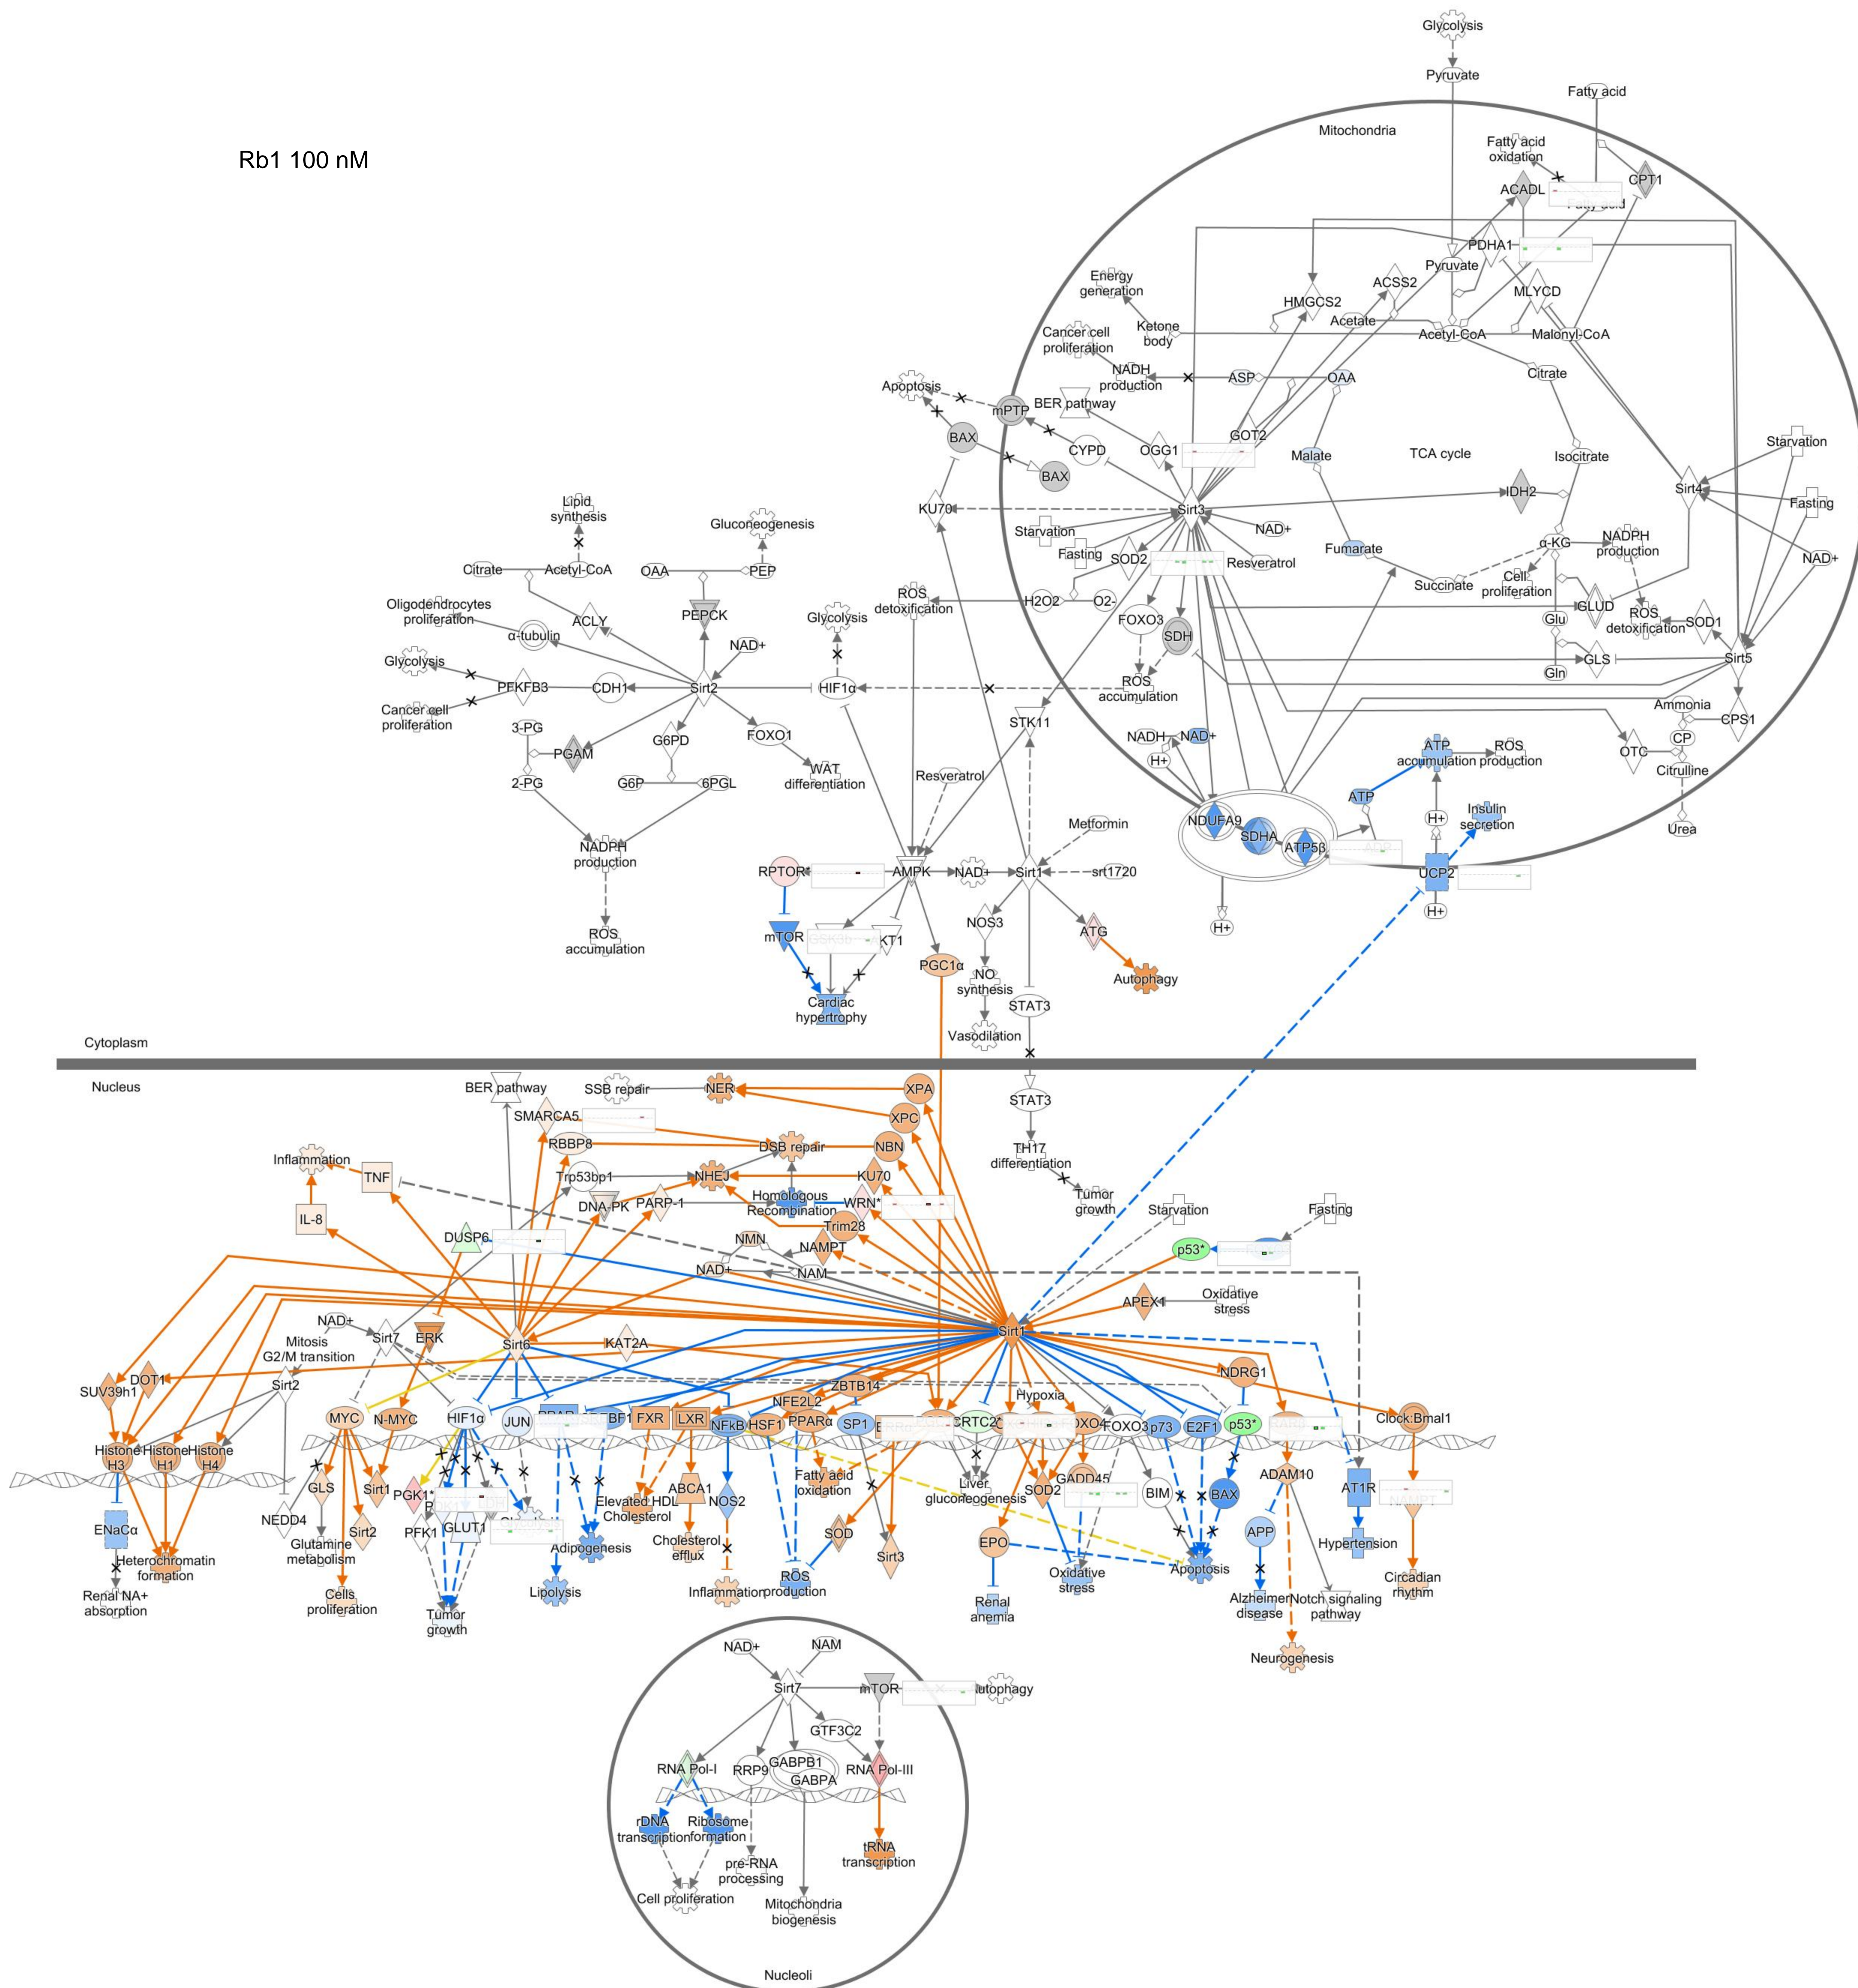



Rg3 100 nM

Cytoplasm

Nucleus

Nucleoli



The diagram illustrates the Sirtuin signaling pathway, showing its interactions across the cytoplasm, nucleus, and nucleoli. Key components and processes include:

- Cytoplasm:**
  - Metabolism:** Glycolysis, Gluconeogenesis, Lipid synthesis, Fatty acid oxidation, TCA cycle, and various metabolic intermediates (e.g., Citrate, Acetyl-CoA, Malate, Fumarate, Succinate, α-KG, Glu, Gln, Ammonia, Citrulline, Urea).
  - Signaling and Regulation:** Sirt1, Sirt2, Sirt3, Sirt4, Sirt5, Sirt6, Sirt7, Sirt8, Sirt9, Sirt10, Sirt11, Sirt12, Sirt13, Sirt14, Sirt15, Sirt16, Sirt17, Sirt18, Sirt19, Sirt20, Sirt21, Sirt22, Sirt23, Sirt24, Sirt25, Sirt26, Sirt27, Sirt28, Sirt29, Sirt30, Sirt31, Sirt32, Sirt33, Sirt34, Sirt35, Sirt36, Sirt37, Sirt38, Sirt39, Sirt40, Sirt41, Sirt42, Sirt43, Sirt44, Sirt45, Sirt46, Sirt47, Sirt48, Sirt49, Sirt50, Sirt51, Sirt52, Sirt53, Sirt54, Sirt55, Sirt56, Sirt57, Sirt58, Sirt59, Sirt60, Sirt61, Sirt62, Sirt63, Sirt64, Sirt65, Sirt66, Sirt67, Sirt68, Sirt69, Sirt70, Sirt71, Sirt72, Sirt73, Sirt74, Sirt75, Sirt76, Sirt77, Sirt78, Sirt79, Sirt80, Sirt81, Sirt82, Sirt83, Sirt84, Sirt85, Sirt86, Sirt87, Sirt88, Sirt89, Sirt90, Sirt91, Sirt92, Sirt93, Sirt94, Sirt95, Sirt96, Sirt97, Sirt98, Sirt99, Sirt100, Sirt101, Sirt102, Sirt103, Sirt104, Sirt105, Sirt106, Sirt107, Sirt108, Sirt109, Sirt110, Sirt111, Sirt112, Sirt113, Sirt114, Sirt115, Sirt116, Sirt117, Sirt118, Sirt119, Sirt120, Sirt121, Sirt122, Sirt123, Sirt124, Sirt125, Sirt126, Sirt127, Sirt128, Sirt129, Sirt130, Sirt131, Sirt132, Sirt133, Sirt134, Sirt135, Sirt136, Sirt137, Sirt138, Sirt139, Sirt140, Sirt141, Sirt142, Sirt143, Sirt144, Sirt145, Sirt146, Sirt147, Sirt148, Sirt149, Sirt150, Sirt151, Sirt152, Sirt153, Sirt154, Sirt155, Sirt156, Sirt157, Sirt158, Sirt159, Sirt160, Sirt161, Sirt162, Sirt163, Sirt164, Sirt165, Sirt166, Sirt167, Sirt168, Sirt169, Sirt170, Sirt171, Sirt172, Sirt173, Sirt174, Sirt175, Sirt176, Sirt177, Sirt178, Sirt179, Sirt180, Sirt181, Sirt182, Sirt183, Sirt184, Sirt185, Sirt186, Sirt187, Sirt188, Sirt189, Sirt190, Sirt191, Sirt192, Sirt193, Sirt194, Sirt195, Sirt196, Sirt197, Sirt198, Sirt199, Sirt200, Sirt201, Sirt202, Sirt203, Sirt204, Sirt205, Sirt206, Sirt207, Sirt208, Sirt209, Sirt210, Sirt211, Sirt212, Sirt213, Sirt214, Sirt215, Sirt216, Sirt217, Sirt218, Sirt219, Sirt220, Sirt221, Sirt222, Sirt223, Sirt224, Sirt225, Sirt226, Sirt227, Sirt228, Sirt229, Sirt230, Sirt231, Sirt232, Sirt233, Sirt234, Sirt235, Sirt236, Sirt237, Sirt238, Sirt239, Sirt240, Sirt241, Sirt242, Sirt243, Sirt244, Sirt245, Sirt246, Sirt247, Sirt248, Sirt249, Sirt250, Sirt251, Sirt252, Sirt253, Sirt254, Sirt255, Sirt256, Sirt257, Sirt258, Sirt259, Sirt260, Sirt261, Sirt262, Sirt263, Sirt264, Sirt265, Sirt266, Sirt267, Sirt268, Sirt269, Sirt270, Sirt271, Sirt272, Sirt273, Sirt274, Sirt275, Sirt276, Sirt277, Sirt278, Sirt279, Sirt280, Sirt281, Sirt282, Sirt283, Sirt284, Sirt285, Sirt286, Sirt287, Sirt288, Sirt289, Sirt290, Sirt291, Sirt292, Sirt293, Sirt294, Sirt295, Sirt296, Sirt297, Sirt298, Sirt299, Sirt300, Sirt301, Sirt302, Sirt303, Sirt304, Sirt305, Sirt306, Sirt307, Sirt308, Sirt309, Sirt310, Sirt311, Sirt312, Sirt313, Sirt314, Sirt315, Sirt316, Sirt317, Sirt318, Sirt319, Sirt320, Sirt321, Sirt322, Sirt323, Sirt324, Sirt325, Sirt326, Sirt327, Sirt328, Sirt329, Sirt330, Sirt331, Sirt332, Sirt333, Sirt334, Sirt335, Sirt336, Sirt337, Sirt338, Sirt339, Sirt340, Sirt341, Sirt342, Sirt343, Sirt344, Sirt345, Sirt346, Sirt347, Sirt348, Sirt349, Sirt350, Sirt351, Sirt352, Sirt353, Sirt354, Sirt355, Sirt356, Sirt357, Sirt358, Sirt359, Sirt360, Sirt361, Sirt362, Sirt363, Sirt364, Sirt365, Sirt366, Sirt367, Sirt368, Sirt369, Sirt370, Sirt371, Sirt372, Sirt373, Sirt374, Sirt375, Sirt376, Sirt377, Sirt378, Sirt379, Sirt380, Sirt381, Sirt382, Sirt383, Sirt384, Sirt385, Sirt386, Sirt387, Sirt388, Sirt389, Sirt390, Sirt391, Sirt392, Sirt393, Sirt394, Sirt395, Sirt396, Sirt397, Sirt398, Sirt399, Sirt400, Sirt401, Sirt402, Sirt403, Sirt404, Sirt405, Sirt406, Sirt407, Sirt408, Sirt409, Sirt410, Sirt411, Sirt412, Sirt413, Sirt414, Sirt415, Sirt416, Sirt417, Sirt418, Sirt419, Sirt420, Sirt421, Sirt422, Sirt423, Sirt424, Sirt425, Sirt426, Sirt427, Sirt428, Sirt429, Sirt430, Sirt431, Sirt432, Sirt433, Sirt434, Sirt435, Sirt436, Sirt437, Sirt438, Sirt439, Sirt440, Sirt441, Sirt442, Sirt443, Sirt444, Sirt445, Sirt446, Sirt447, Sirt448, Sirt449, Sirt450, Sirt451, Sirt452, Sirt453, Sirt454, Sirt455, Sirt456, Sirt457, Sirt458, Sirt459, Sirt460, Sirt461, Sirt462, Sirt463, Sirt464, Sirt465, Sirt466, Sirt467, Sirt468, Sirt469, Sirt470, Sirt471, Sirt472, Sirt473, Sirt474, Sirt475, Sirt476, Sirt477, Sirt478, Sirt479, Sirt480, Sirt481, Sirt482, Sirt483, Sirt484, Sirt485, Sirt486, Sirt487, Sirt488, Sirt489, Sirt490, Sirt491, Sirt492, Sirt493, Sirt494, Sirt495, Sirt496, Sirt497, Sirt498, Sirt499, Sirt500, Sirt501, Sirt502, Sirt503, Sirt504, Sirt505, Sirt506, Sirt507, Sirt508, Sirt509, Sirt510, Sirt511, Sirt512, Sirt513, Sirt514, Sirt515, Sirt516, Sirt517, Sirt518, Sirt519, Sirt520, Sirt521, Sirt522, Sirt523, Sirt524, Sirt525, Sirt526, Sirt527, Sirt528, Sirt529, Sirt530, Sirt531, Sirt532, Sirt533, Sirt534, Sirt535, Sirt536, Sirt537, Sirt538, Sirt539, Sirt540, Sirt541, Sirt542, Sirt543, Sirt544, Sirt545, Sirt546, Sirt547, Sirt548, Sirt549, Sirt550, Sirt551, Sirt552, Sirt553, Sirt554, Sirt555, Sirt556, Sirt557, Sirt558, Sirt559, Sirt560, Sirt561, Sirt562, Sirt563, Sirt564, Sirt565, Sirt566, Sirt567, Sirt568, Sirt569, Sirt570, Sirt571, Sirt572, Sirt573, Sirt574, Sirt575, Sirt576, Sirt577, Sirt578, Sirt579, Sirt580, Sirt581, Sirt582, Sirt583, Sirt584, Sirt585, Sirt586, Sirt587, Sirt588, Sirt589, Sirt590, Sirt591, Sirt592, Sirt593, Sirt594, Sirt595, Sirt596, Sirt597, Sirt598, Sirt599, Sirt600, Sirt601, Sirt602, Sirt603, Sirt604, Sirt605, Sirt606, Sirt607, Sirt608, Sirt609, Sirt610, Sirt611, Sirt612, Sirt613, Sirt614, Sirt615, Sirt616, Sirt617, Sirt618, Sirt619, Sirt620, Sirt621, Sirt622, Sirt623, Sirt624, Sirt625, Sirt626, Sirt627, Sirt628, Sirt629, Sirt630, Sirt631, Sirt632, Sirt633, Sirt634, Sirt635, Sirt636, Sirt637, Sirt638, Sirt639, Sirt640, Sirt641, Sirt642, Sirt643, Sirt644, Sirt645, Sirt646, Sirt647, Sirt648, Sirt649, Sirt650, Sirt651, Sirt6



Sirtuins are class III histone deacetylase enzymes that use NAD<sup>+</sup> as a co-substrate for their enzymatic activities. In mammals, there are 7 sirtuin members (SIRT1-7), which play important roles in aging, metabolism, cancer, inflammation, DNA repair and cellular responses to stress.

Rk1 100 nM

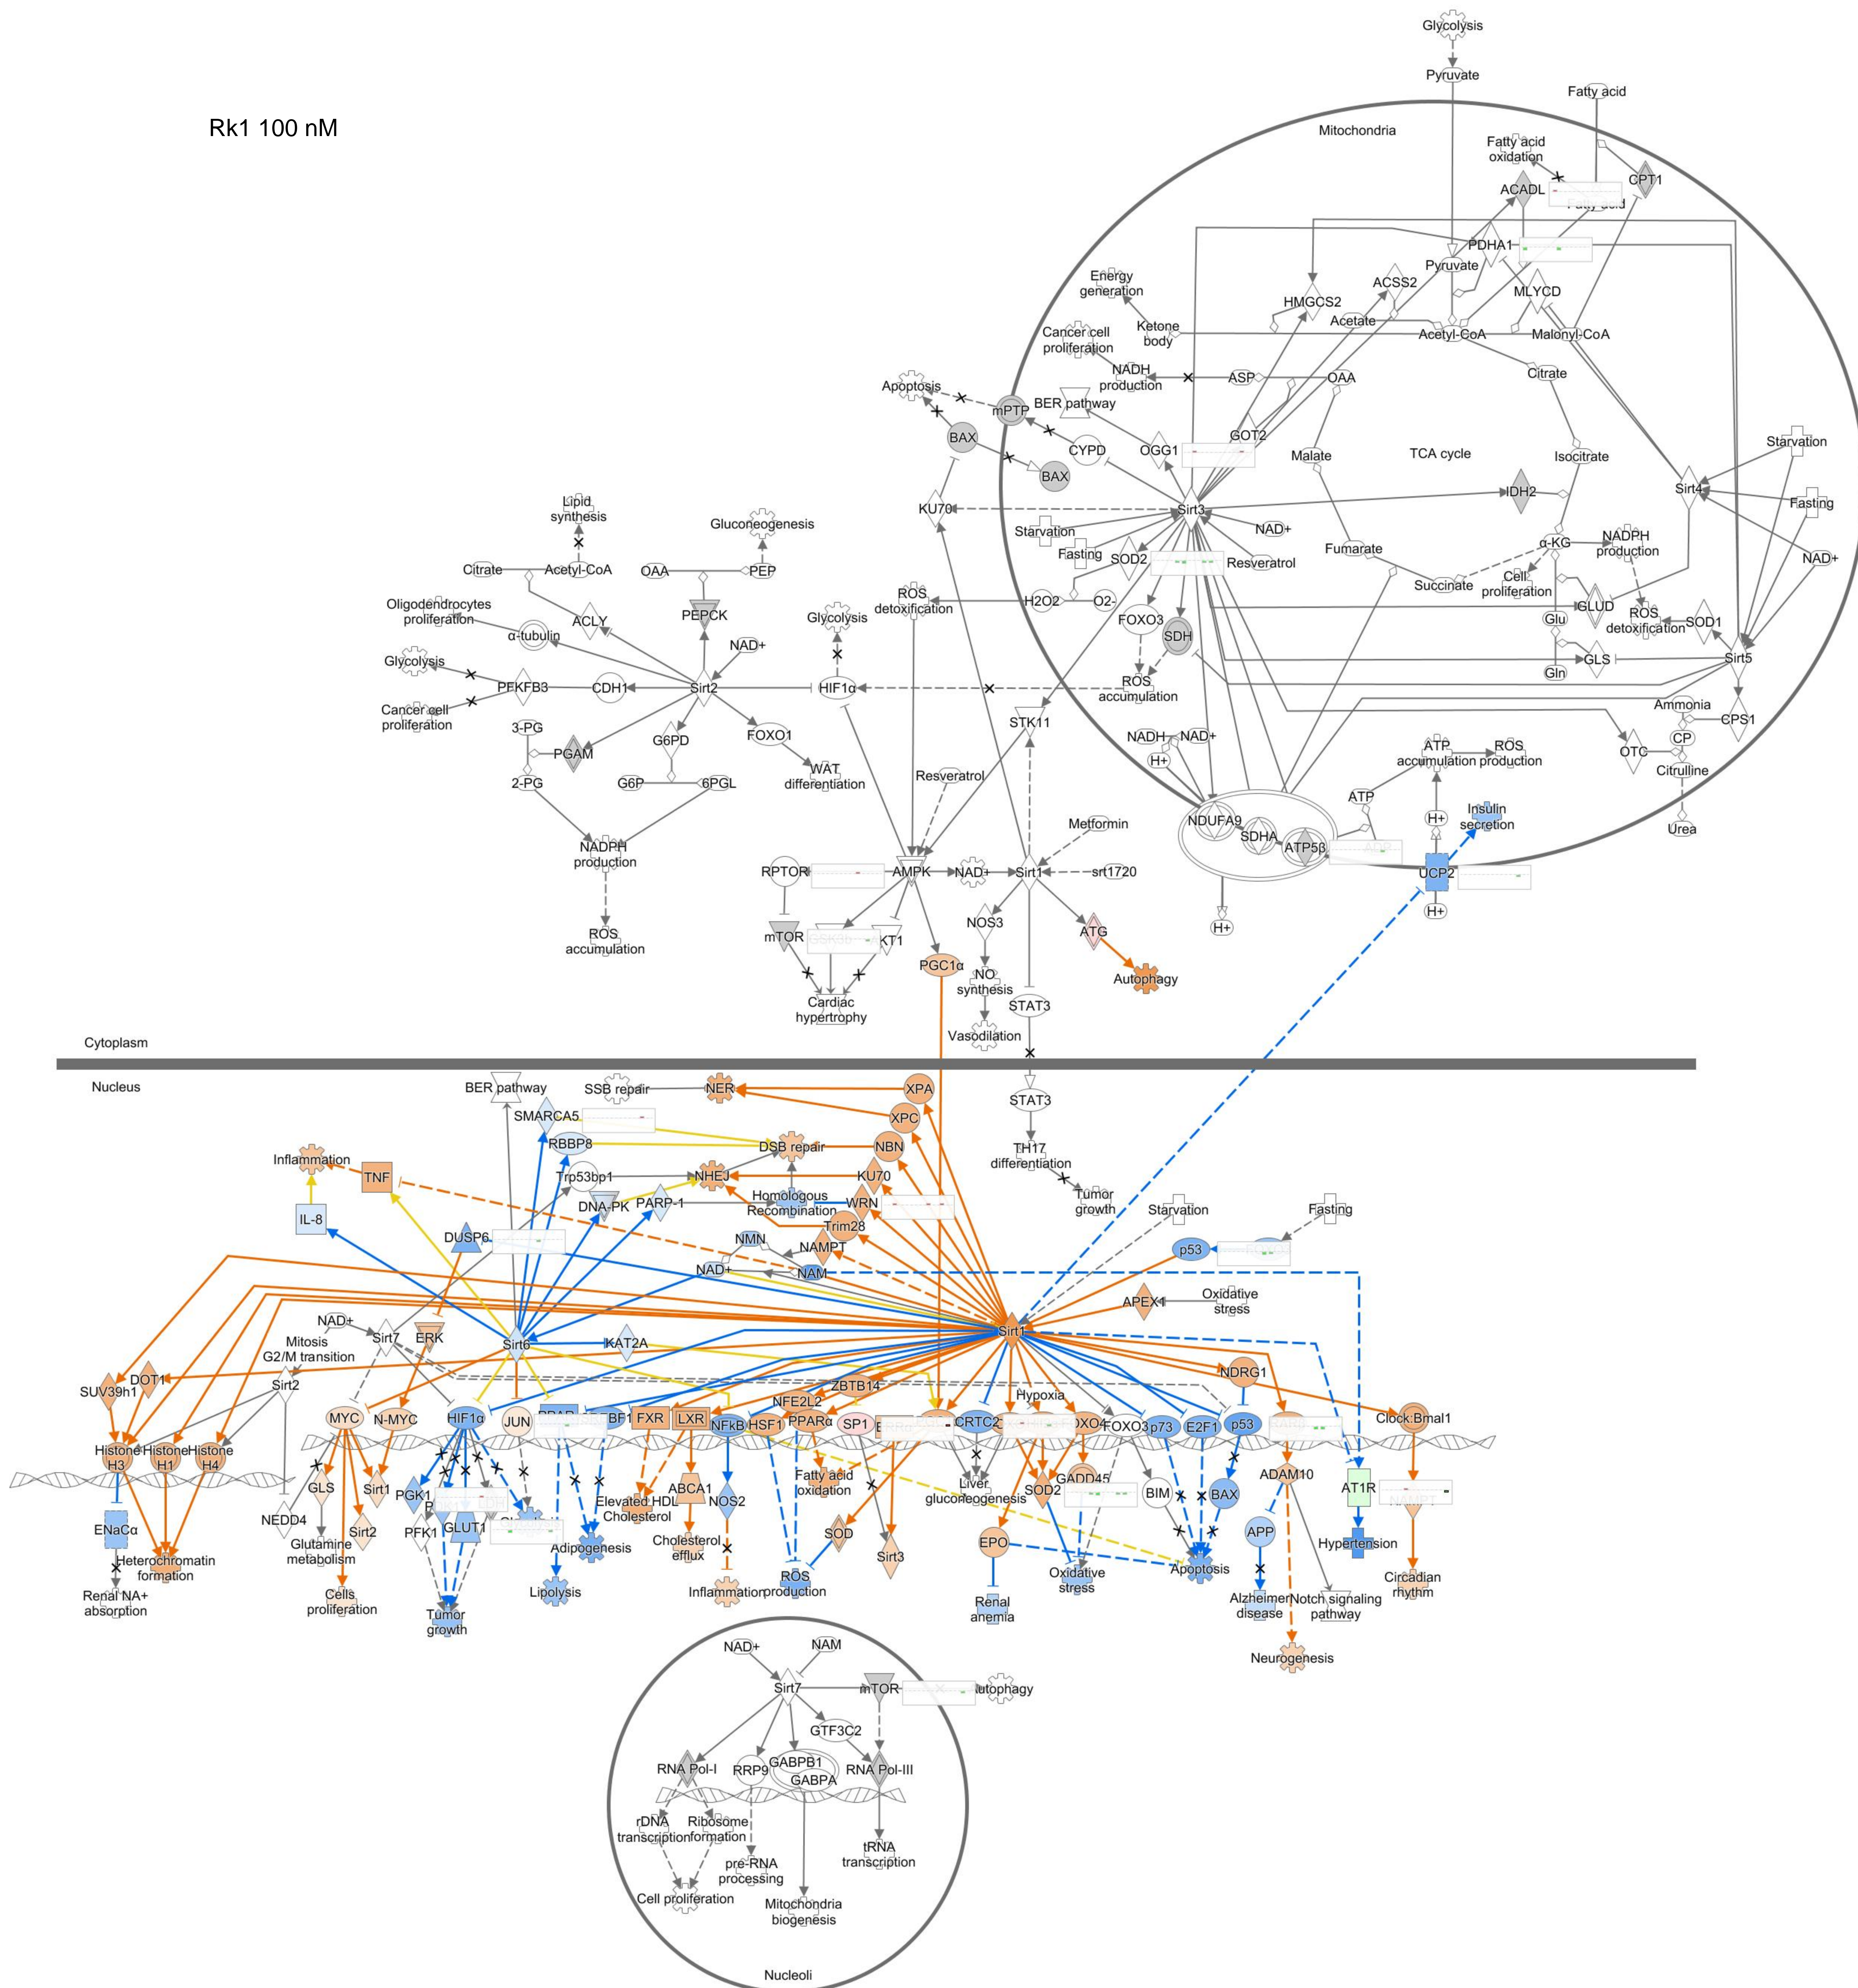

Supplement: Supplementary file 2 [file supplementary]
