# Supplementary material for: Network Pharmacology of Ginseng (Part II): The Differential Effects of Red Ginseng and Ginsenoside Rg5 in Cancer and Heart Diseases as Determined by Transcriptomics
Source: Preprints.org preprint supplement (doi:10.20944/preprints202109.0258.v1), 2021-09-15

The diagram illustrates the complex signaling pathways leading to cellular senescence. Key components include:

- Stimuli:** Developmentally programmed senescence, Damage-associated molecular patterns (DAMPs), Serum amyloid-A, Oxidative stress, and Telomere erosion.
- Receptors:** TGFBR, TLR2, L-VDCC, and others.
- Signaling Molecules:** Kinases (Ras, Raf, MEK, ERK, Akt, mTOR, JNK, p38, MAPK, GSK3, etc.), phosphatases (PTEN, PDK1, etc.), and transcription factors (NF-κB, FOXO, etc.).
- Key Nodes:** TP53, NF-κB, FOXO, and others.
- Cellular Processes:** Cell cycle arrest, DNA damage response, Senescence-associated secretory phenotype (SASP), and others.







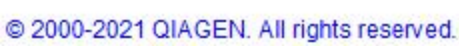



Cellular senescence is an anti-proliferative program that restricts the propagation of cells subjected to different kinds of stress. Senescence has important role in numerous biological processes such as maintenance of tissue homeostasis, wound healing, embryonic development and also is implicated in organismal aging, in development of age-related diseases and cancer progression. These detrimental effects are primarily driven by the pro-inflammatory and hyper-secretory phenotype of senescent cells.

HRG80 100 ng/ml

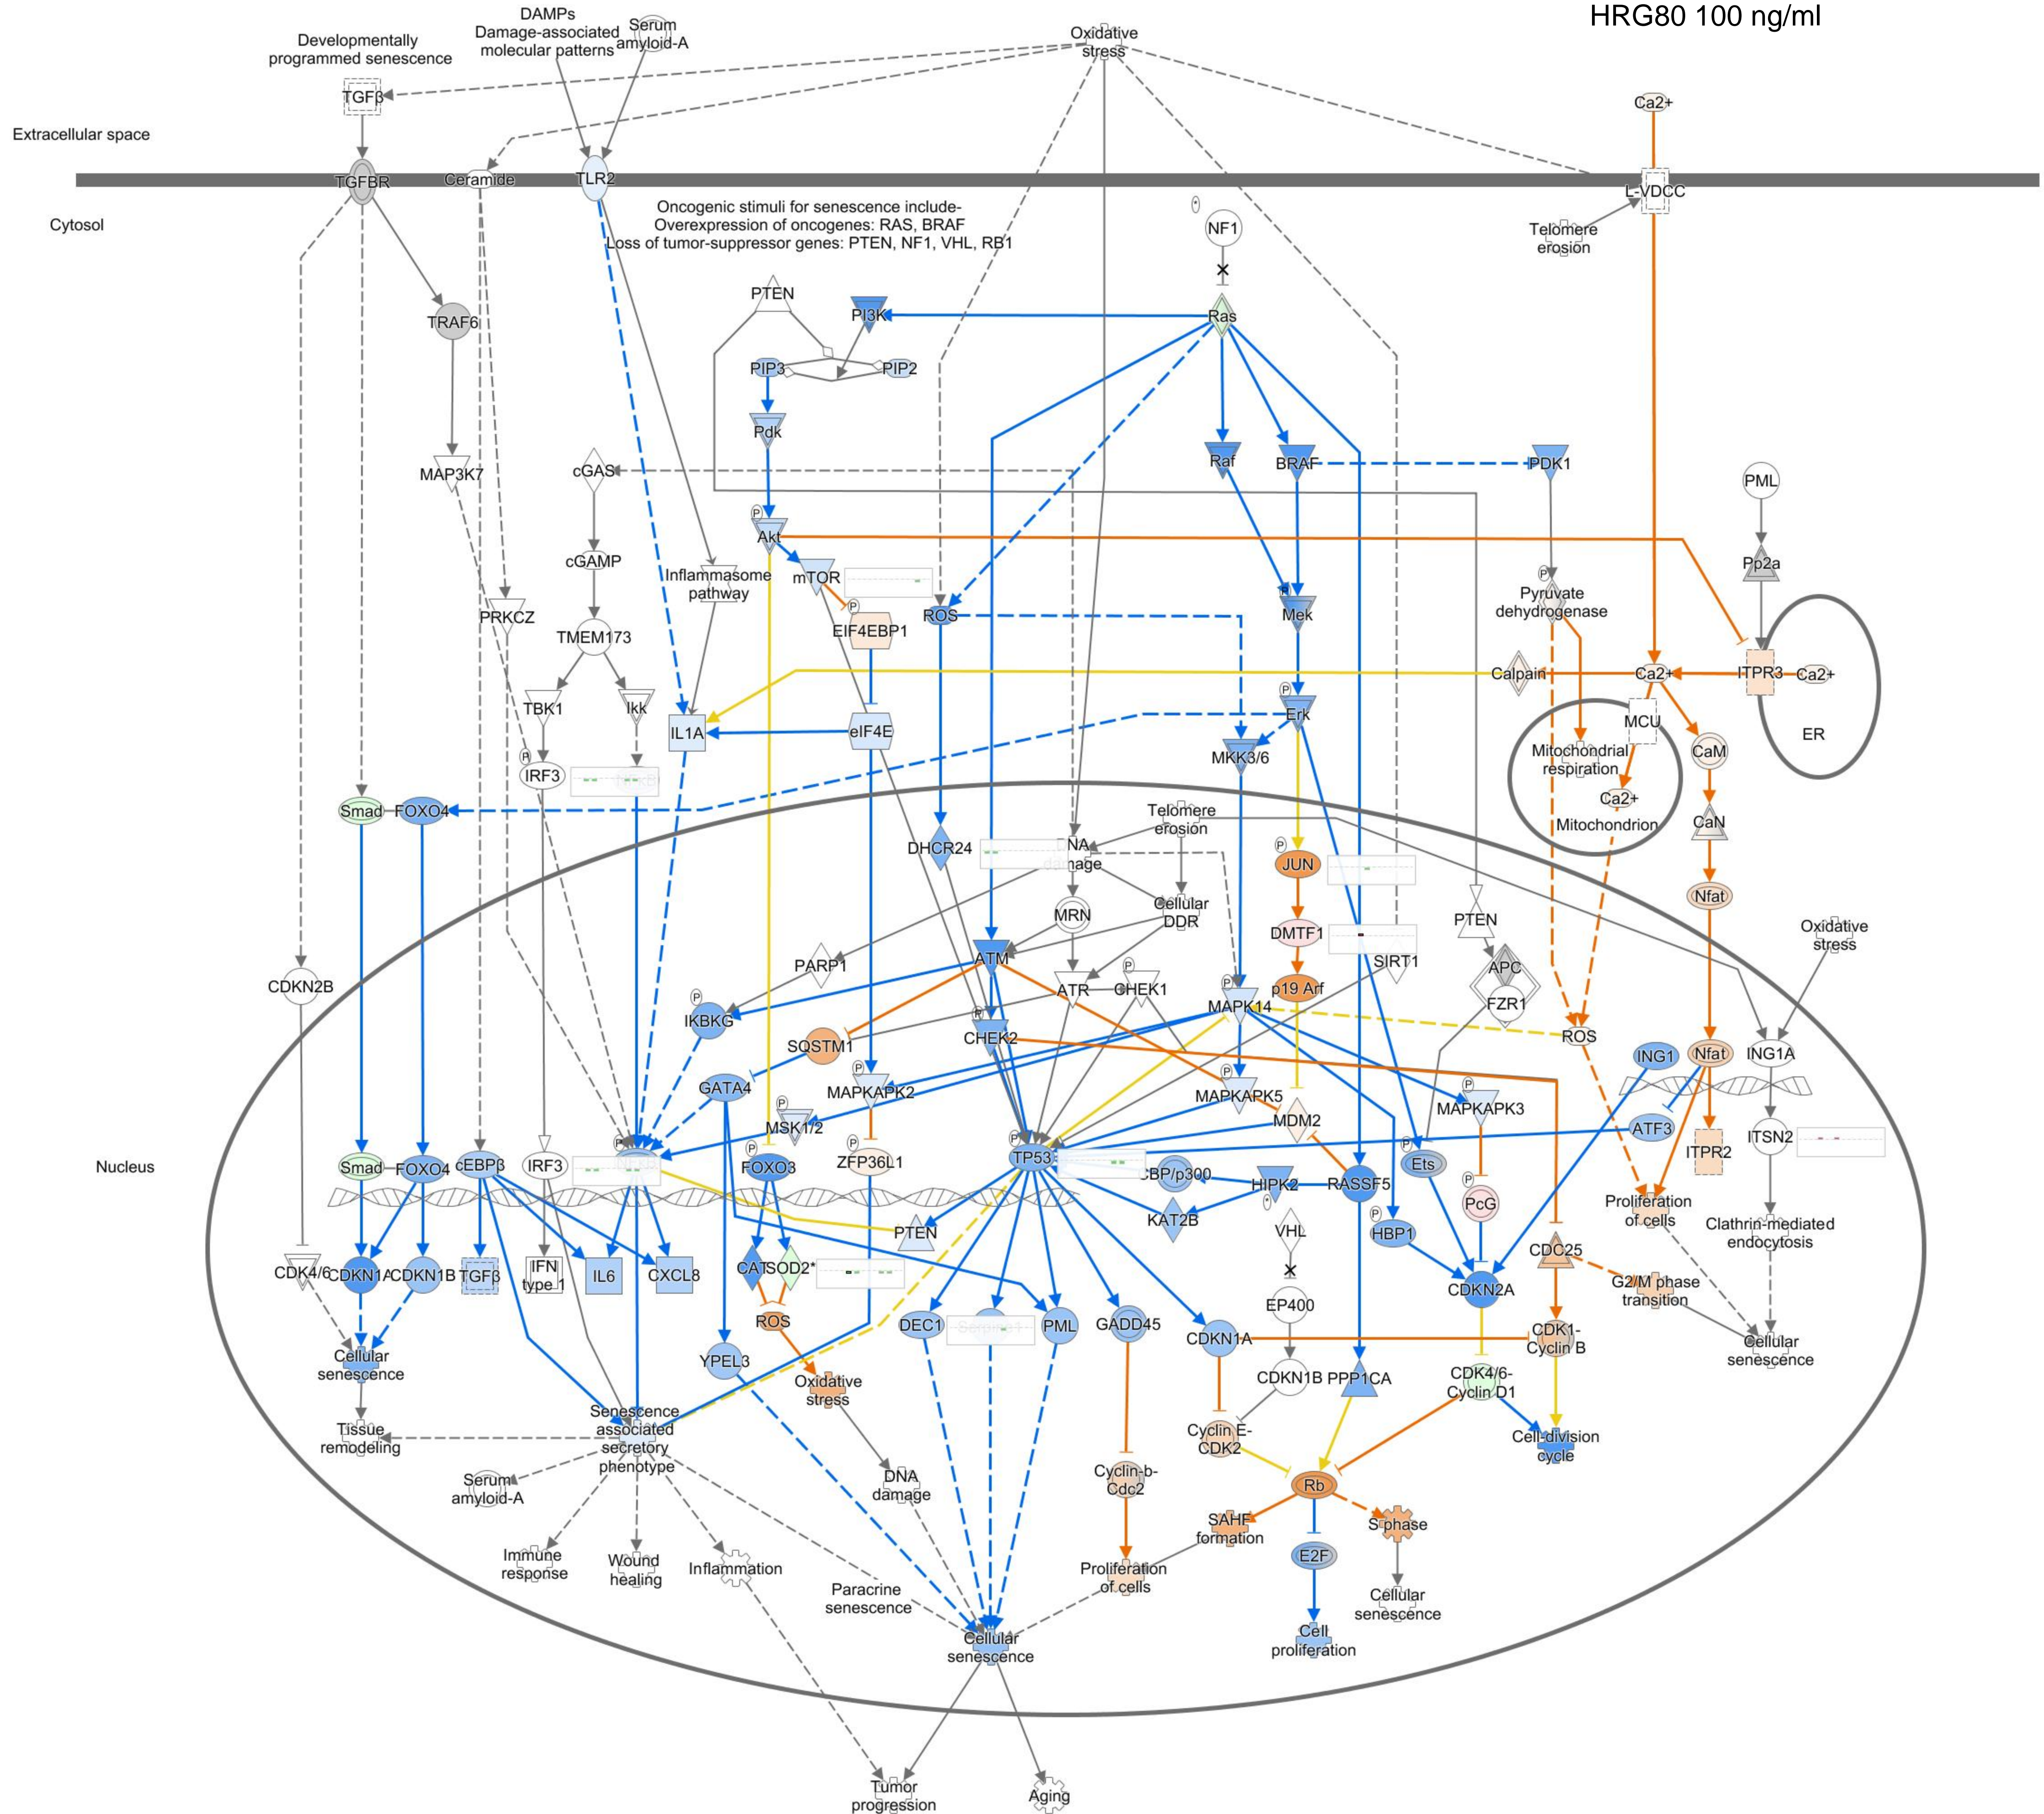



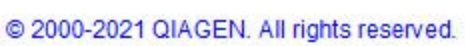















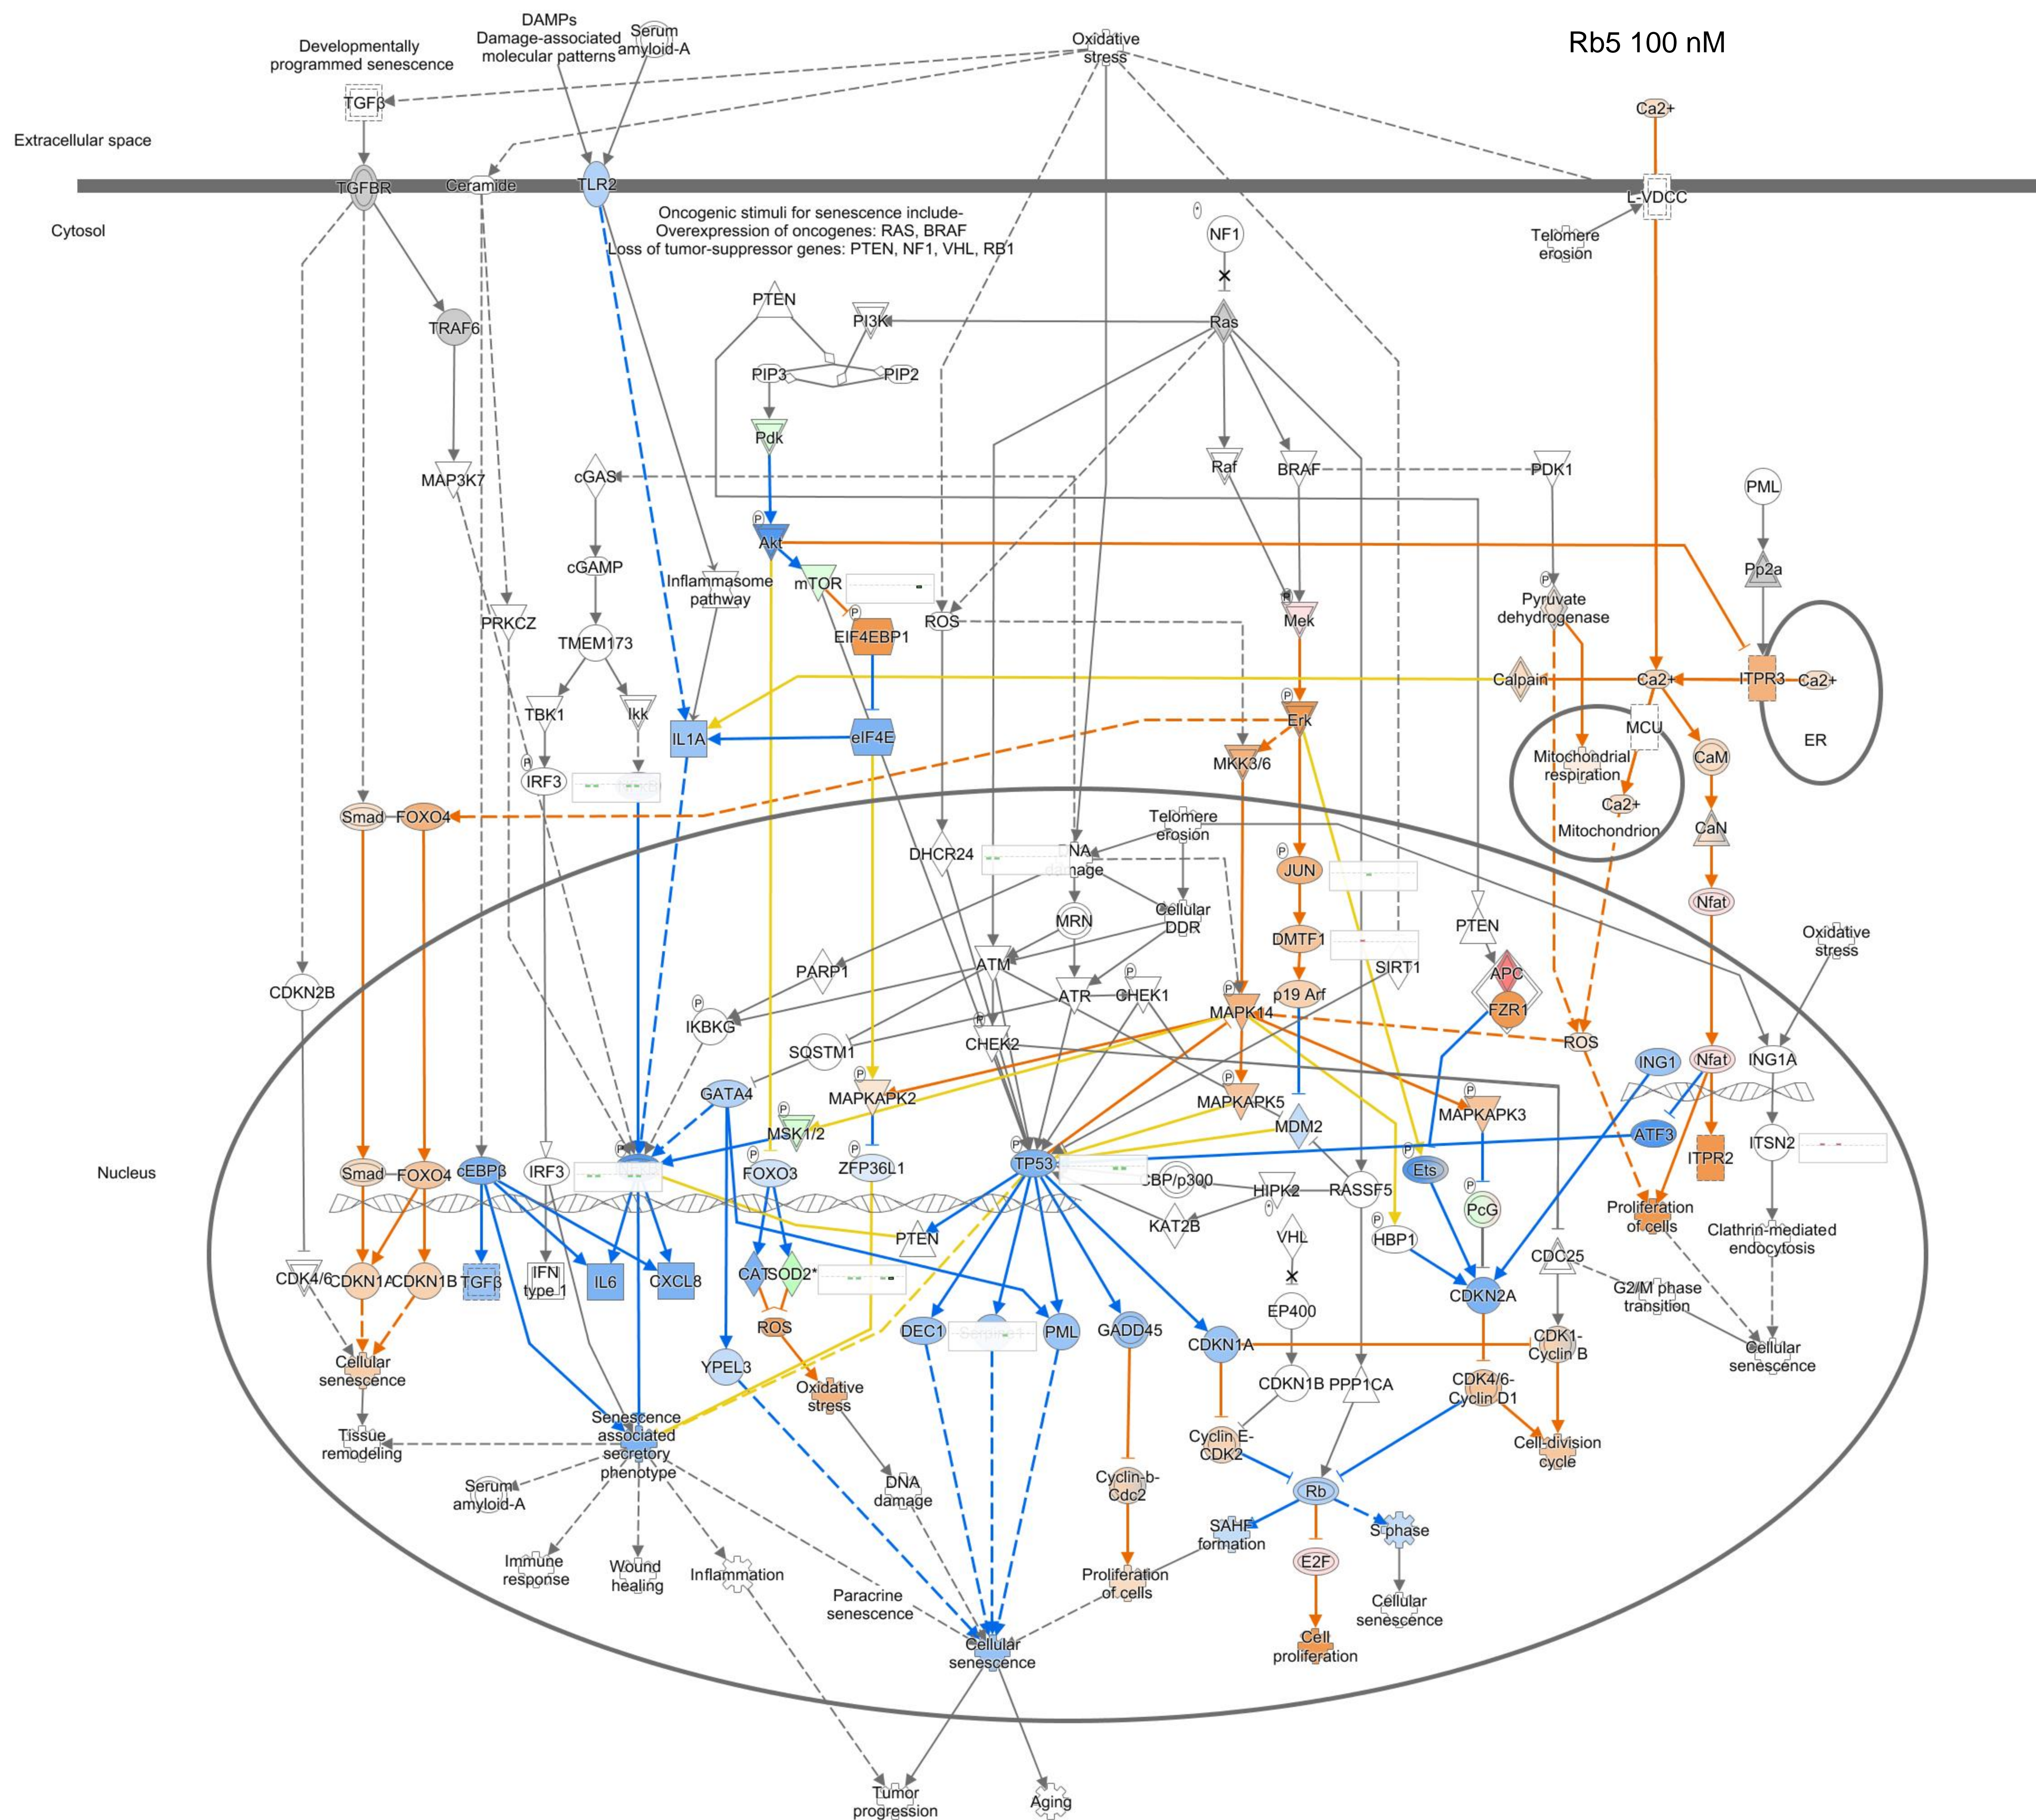





Supplement: Supplementary file 6 [file supplementary]
