# Supplementary figures and images for: Network Pharmacology of Ginseng (Part II): The Differential Effects of Red Ginseng and Ginsenoside Rg5 in Cancer and Heart Diseases as Determined by Transcriptomics
Source: Preprints.org preprint supplement (doi:10.20944/preprints202109.0258.v1), 2021-09-15

WG 10000 ng/ml

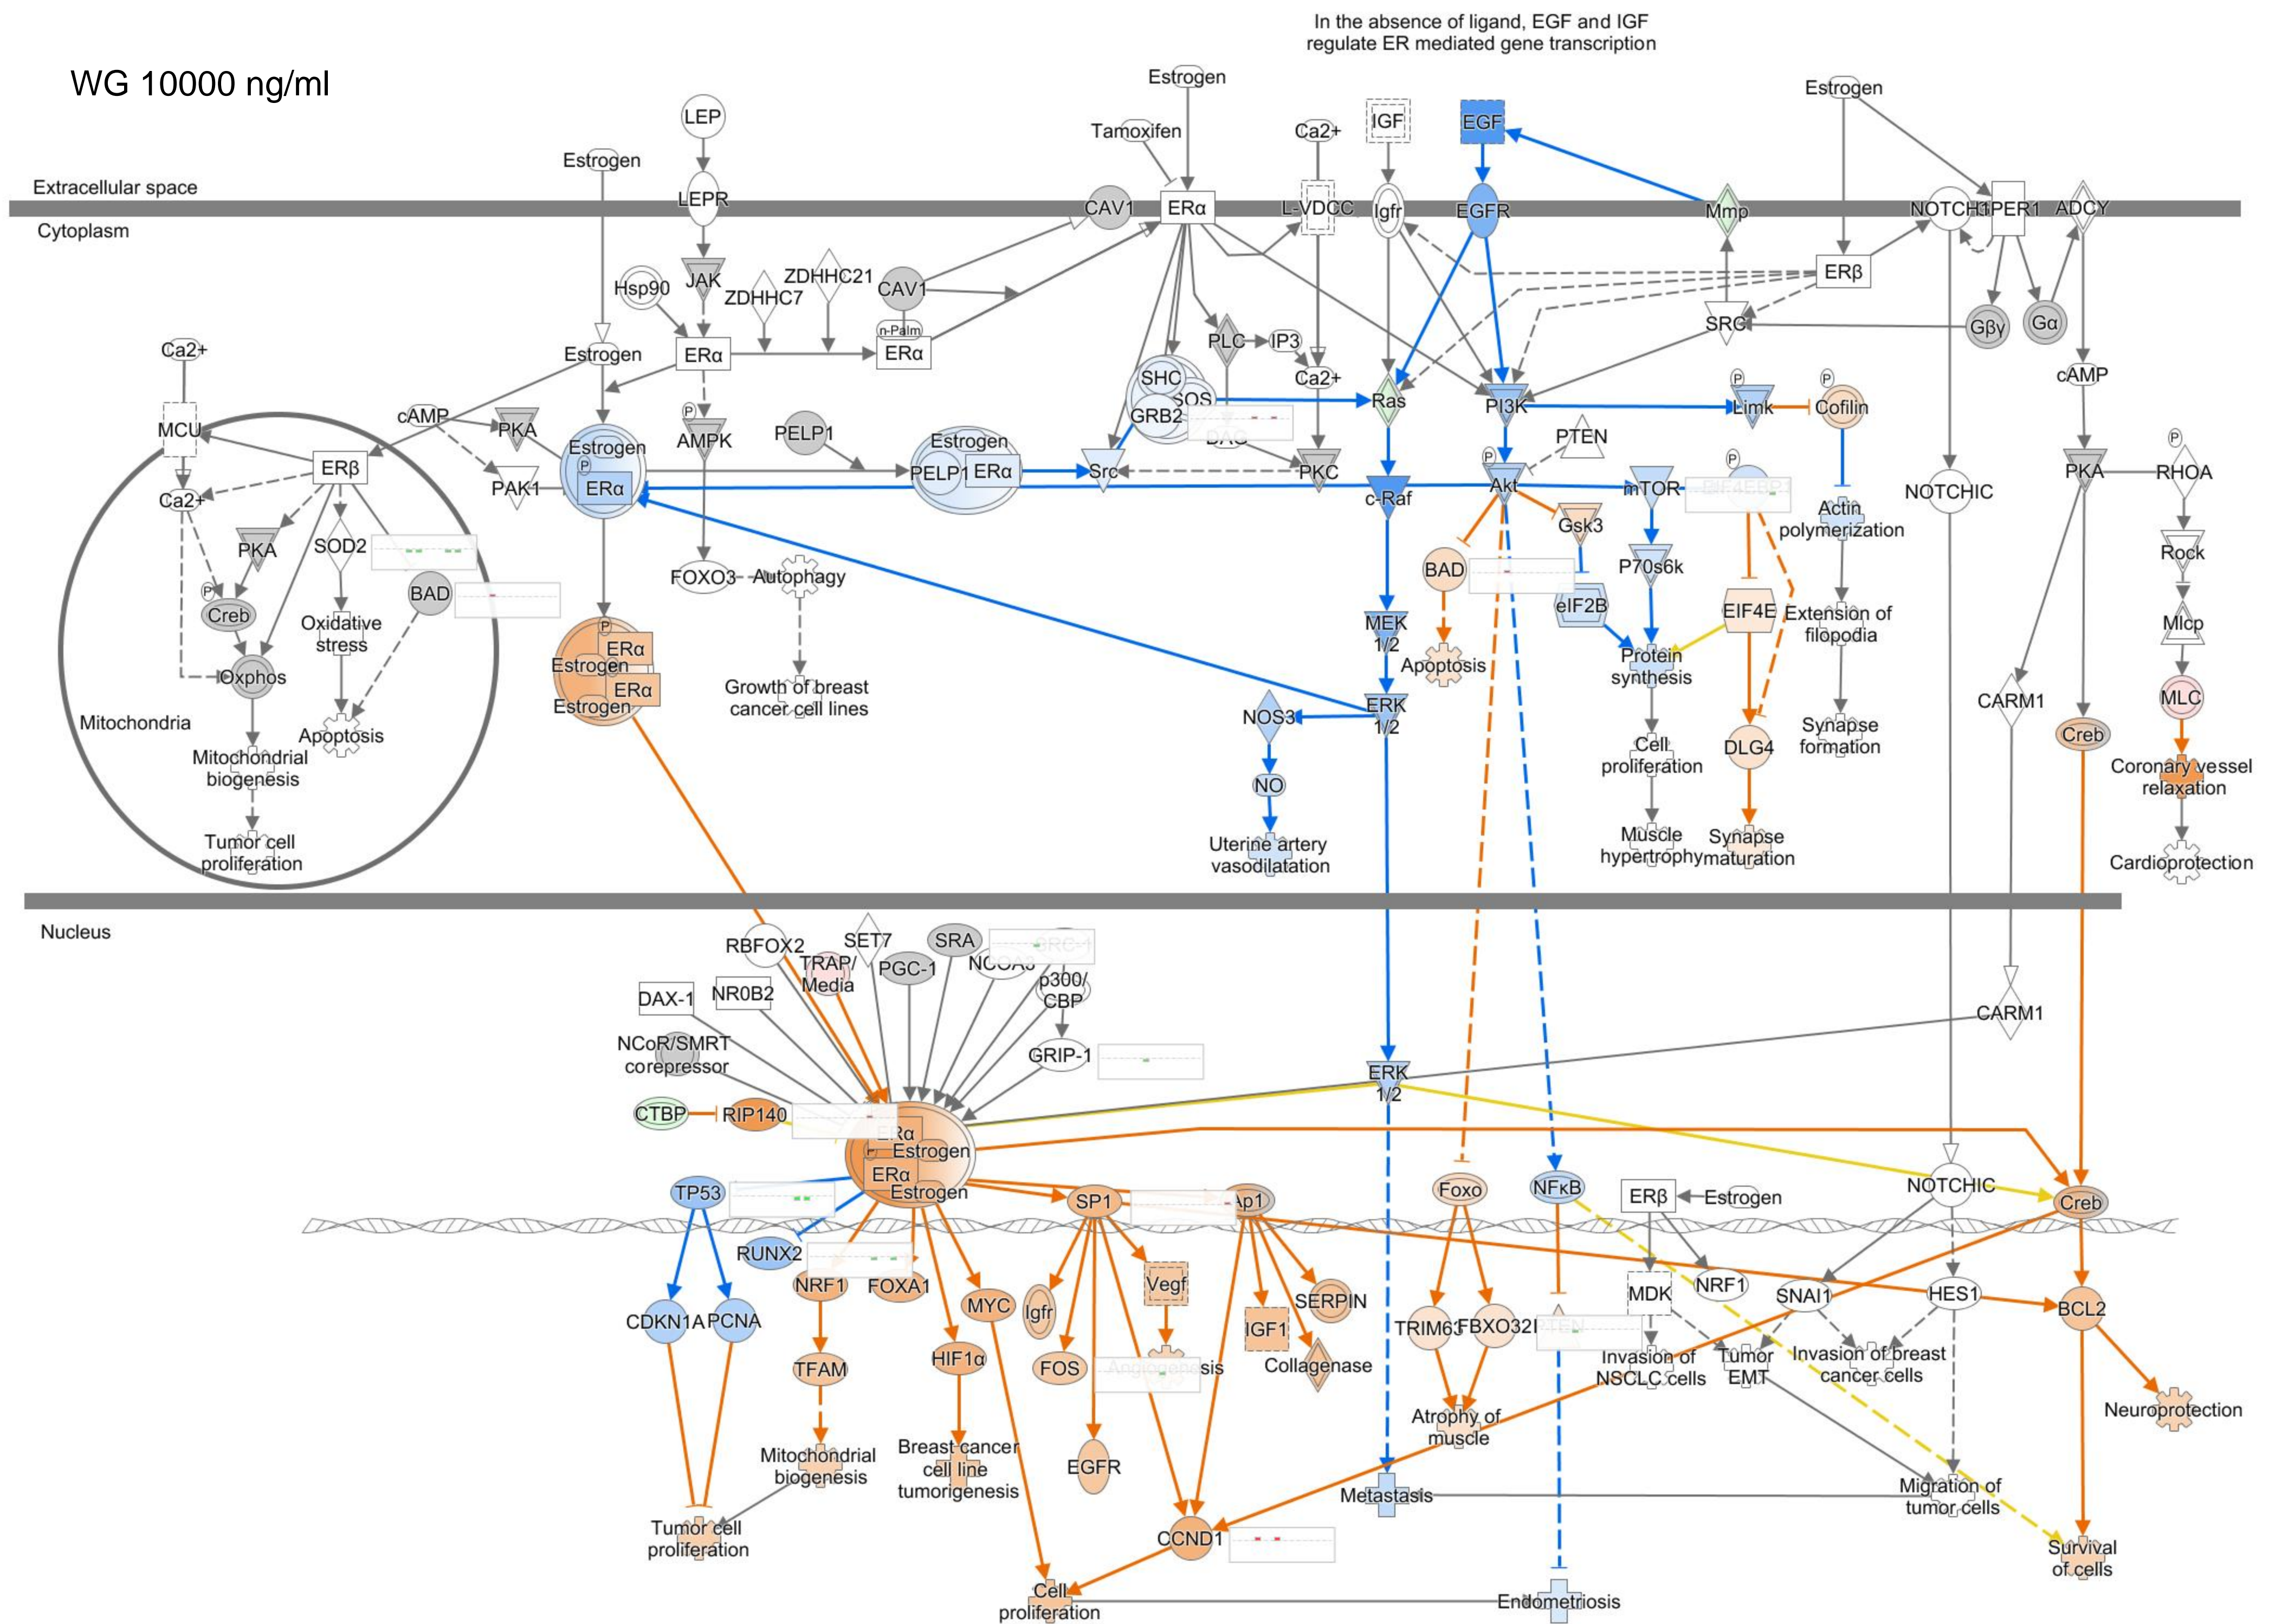



HRG80 10000 ng/ml

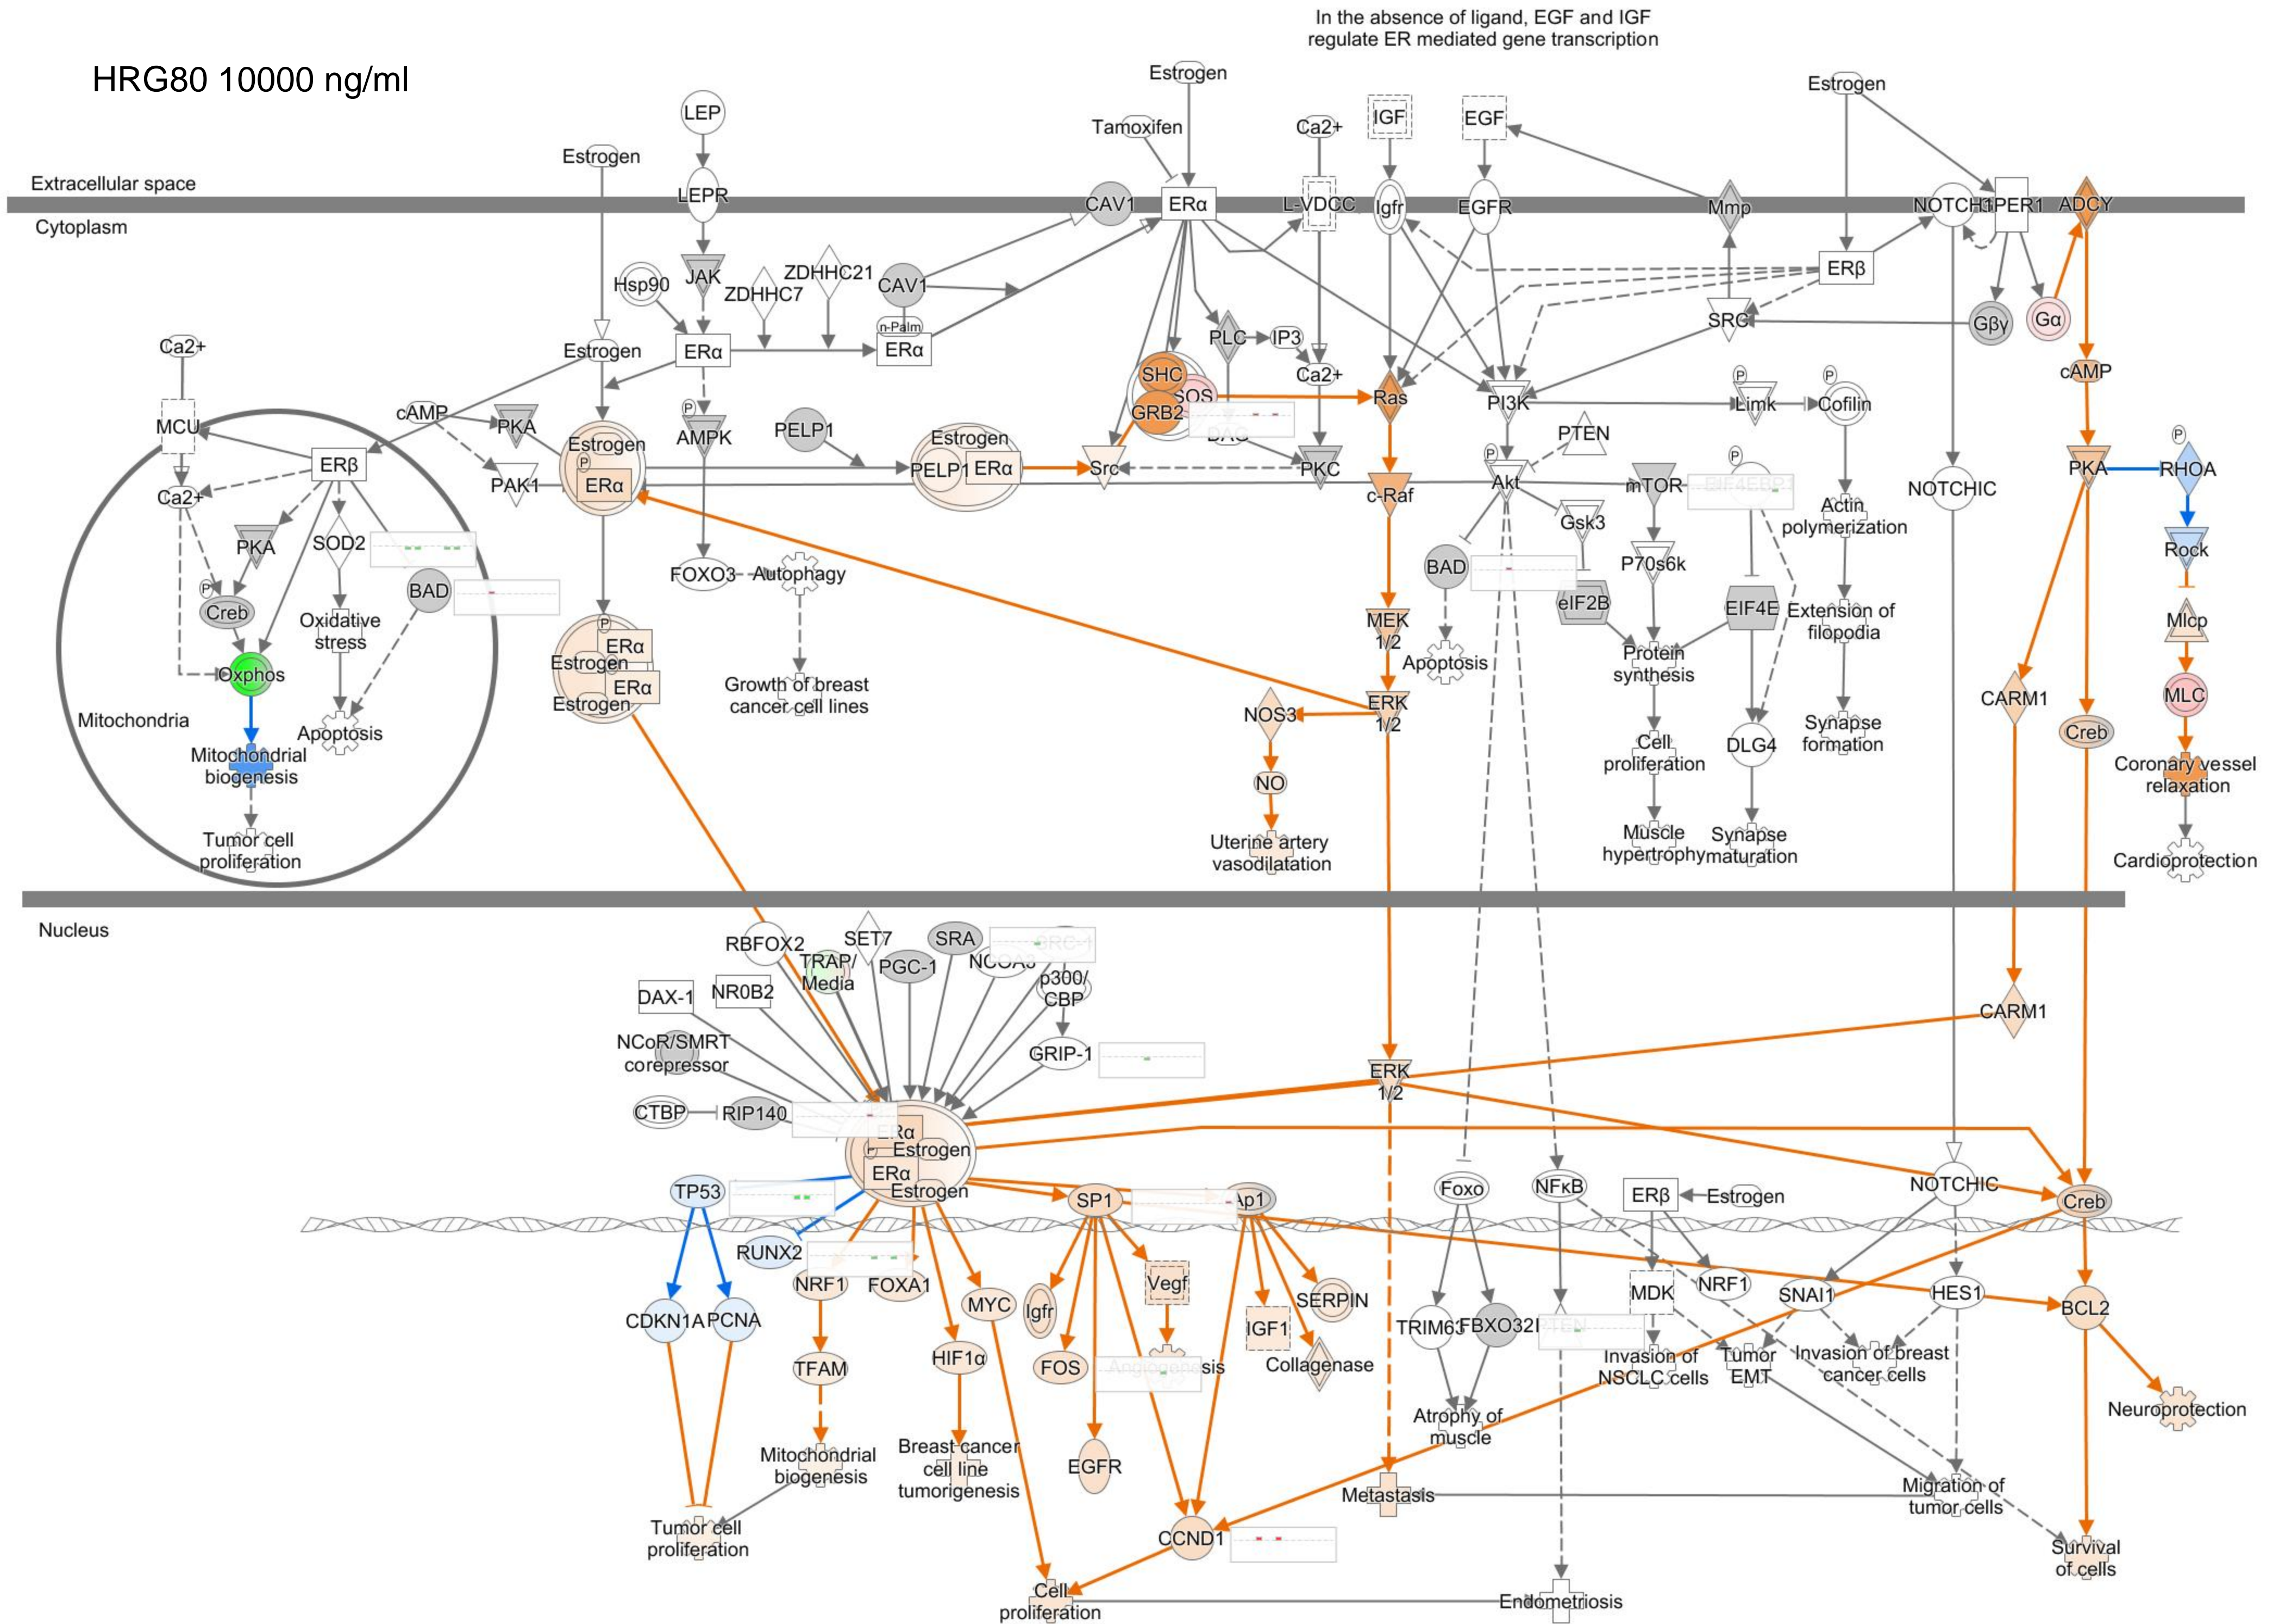



HRG80 1000 ng/m

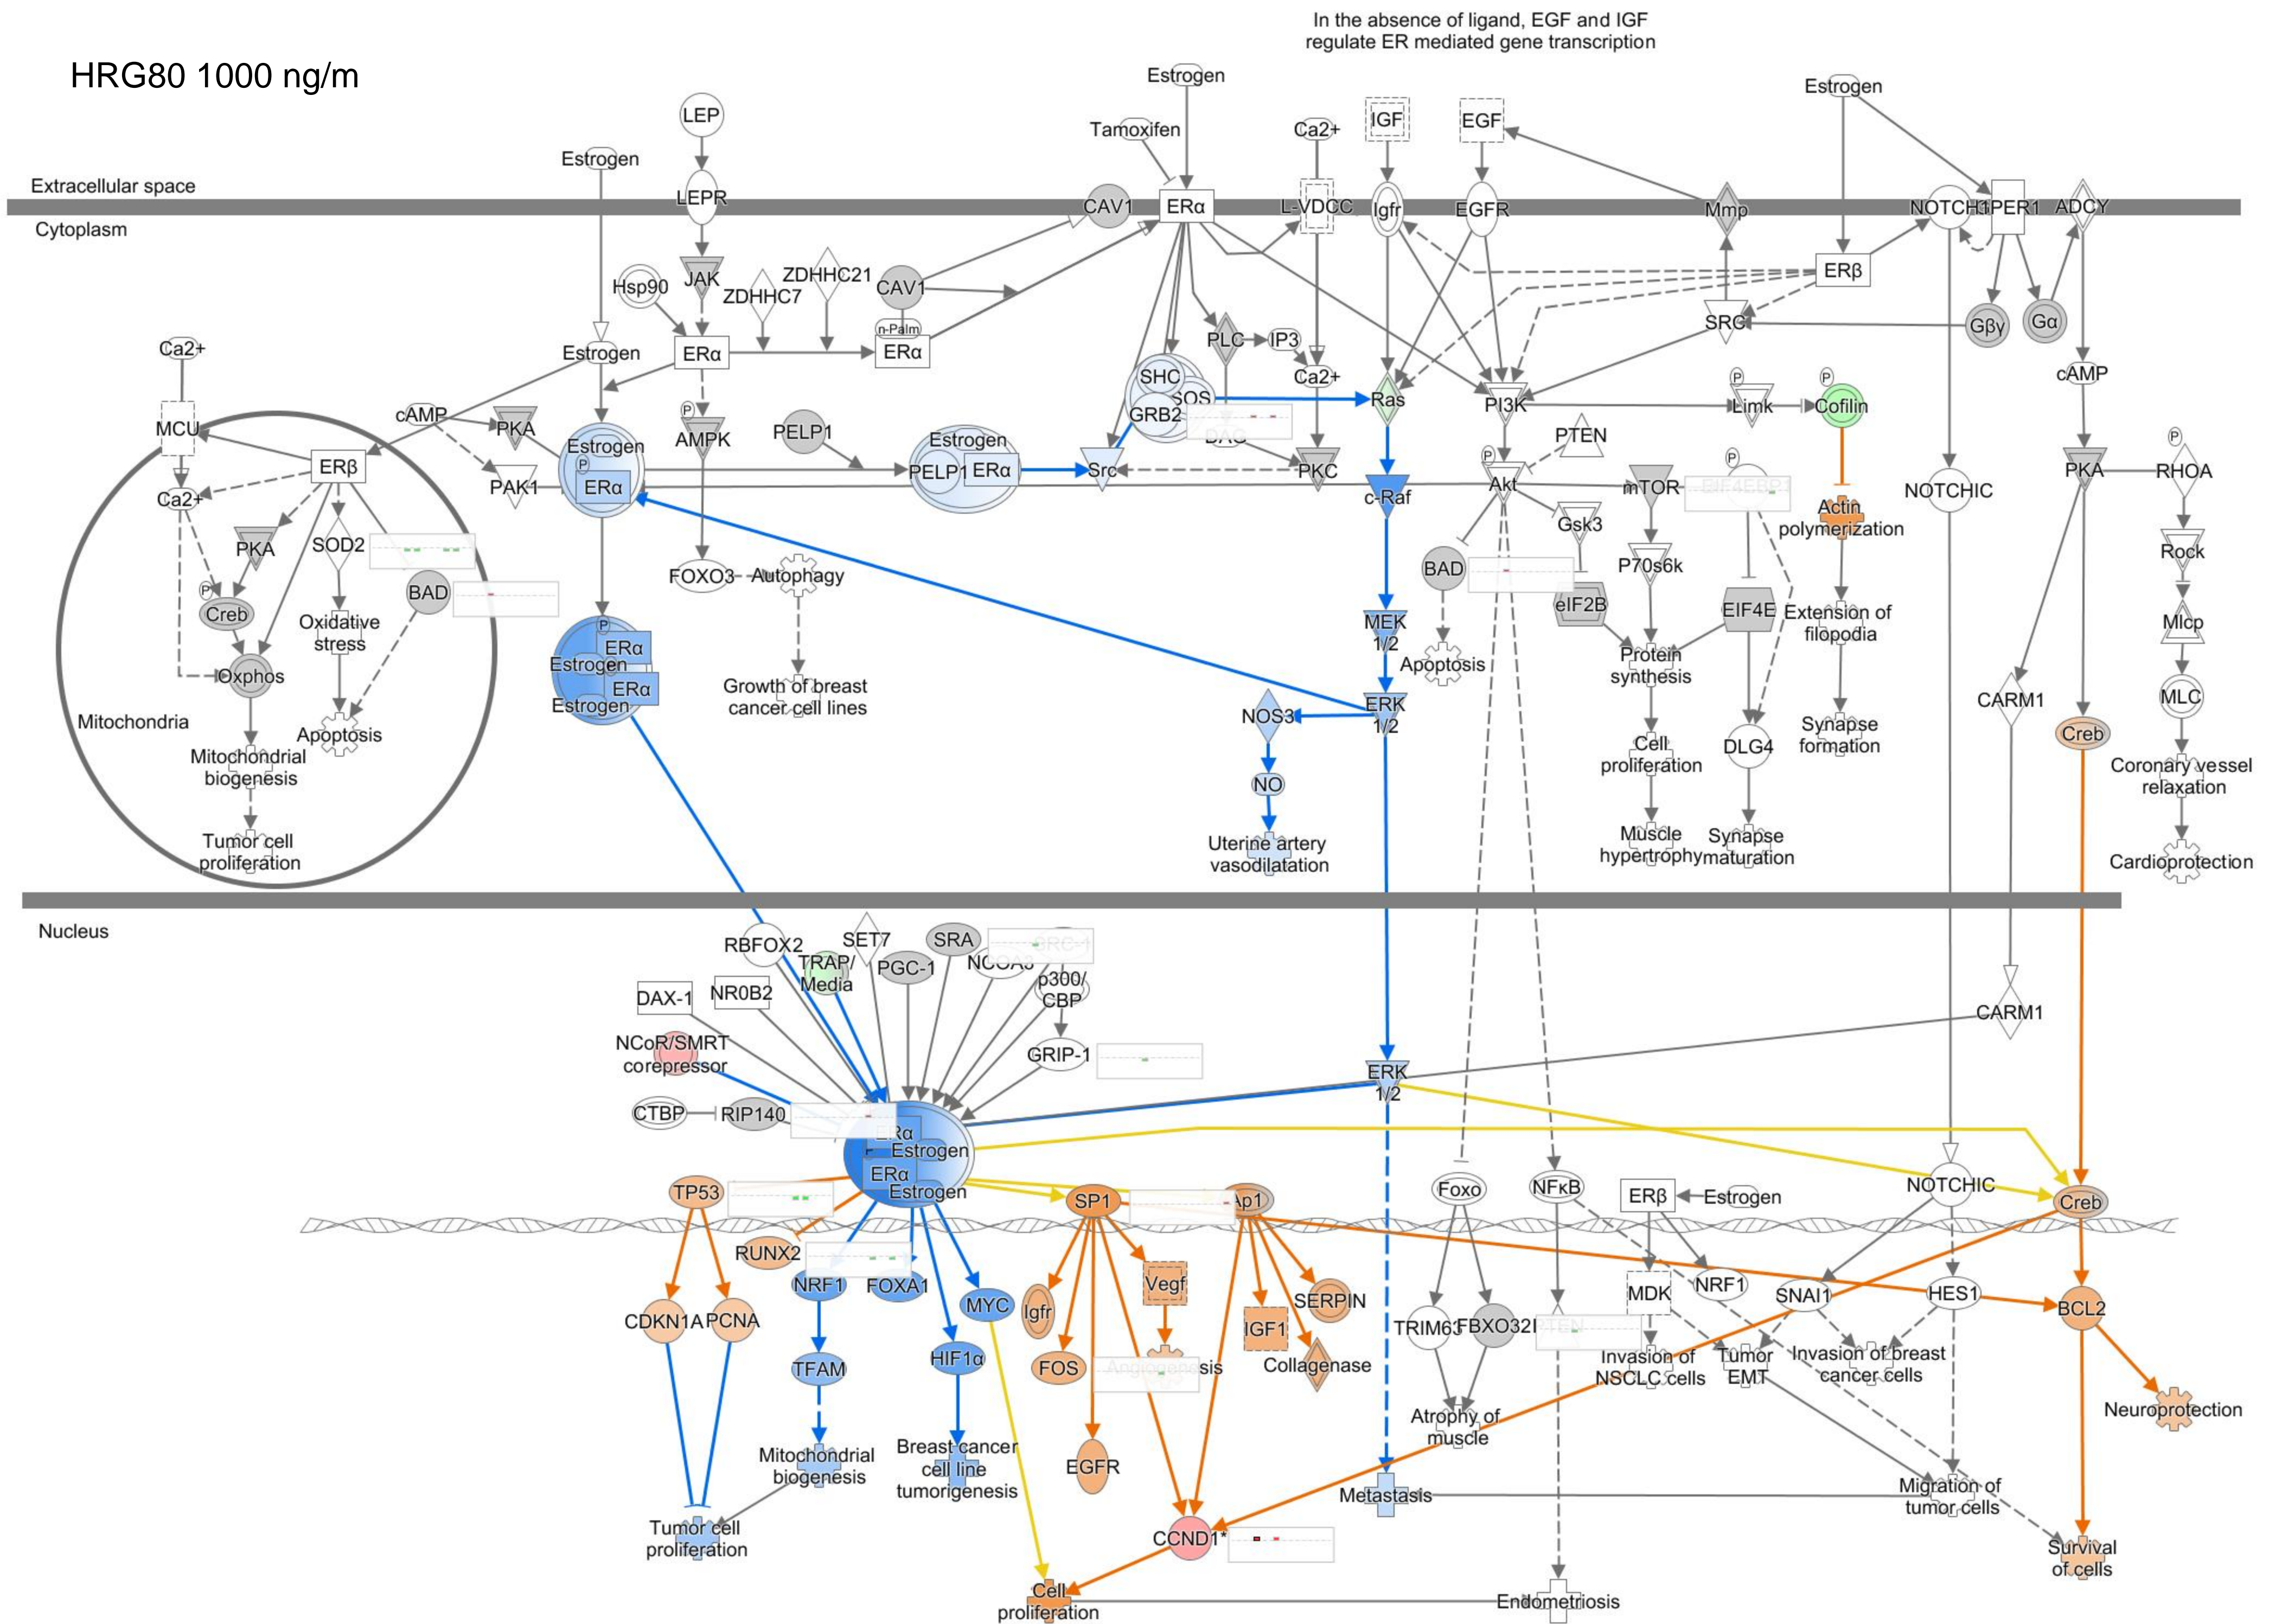



HRG80 100 ng/m

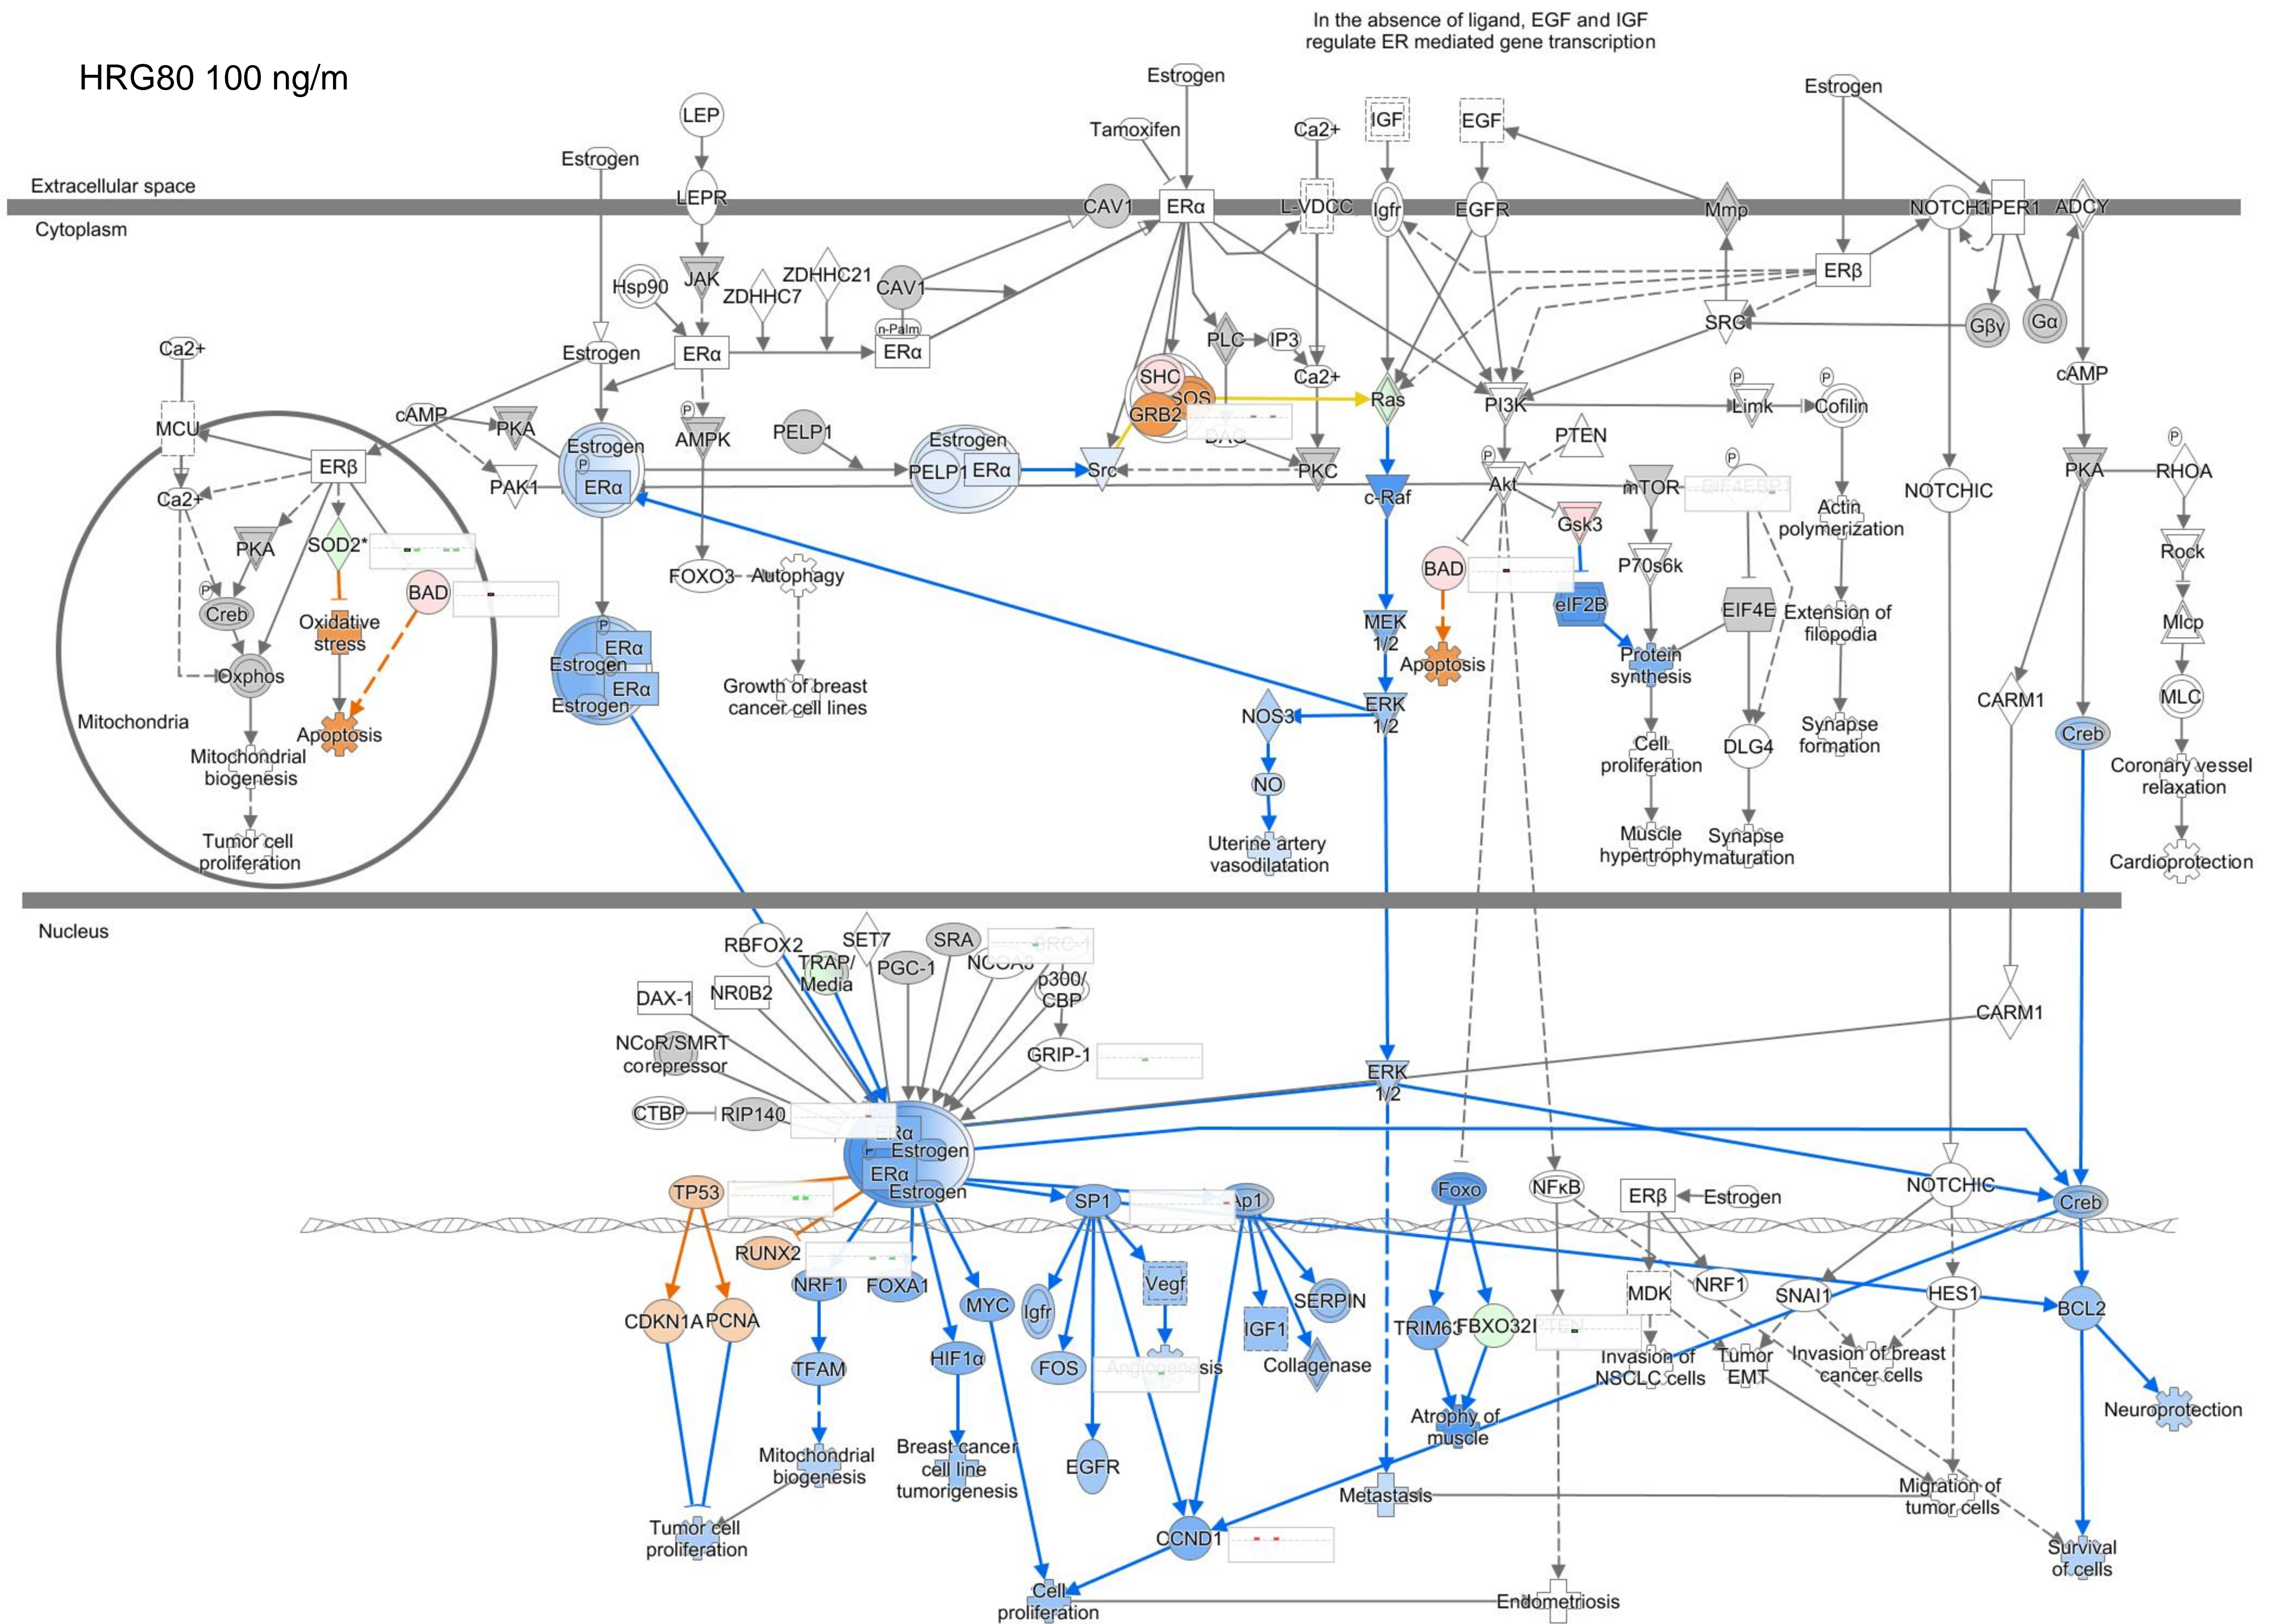



HRG80 10 ng/m

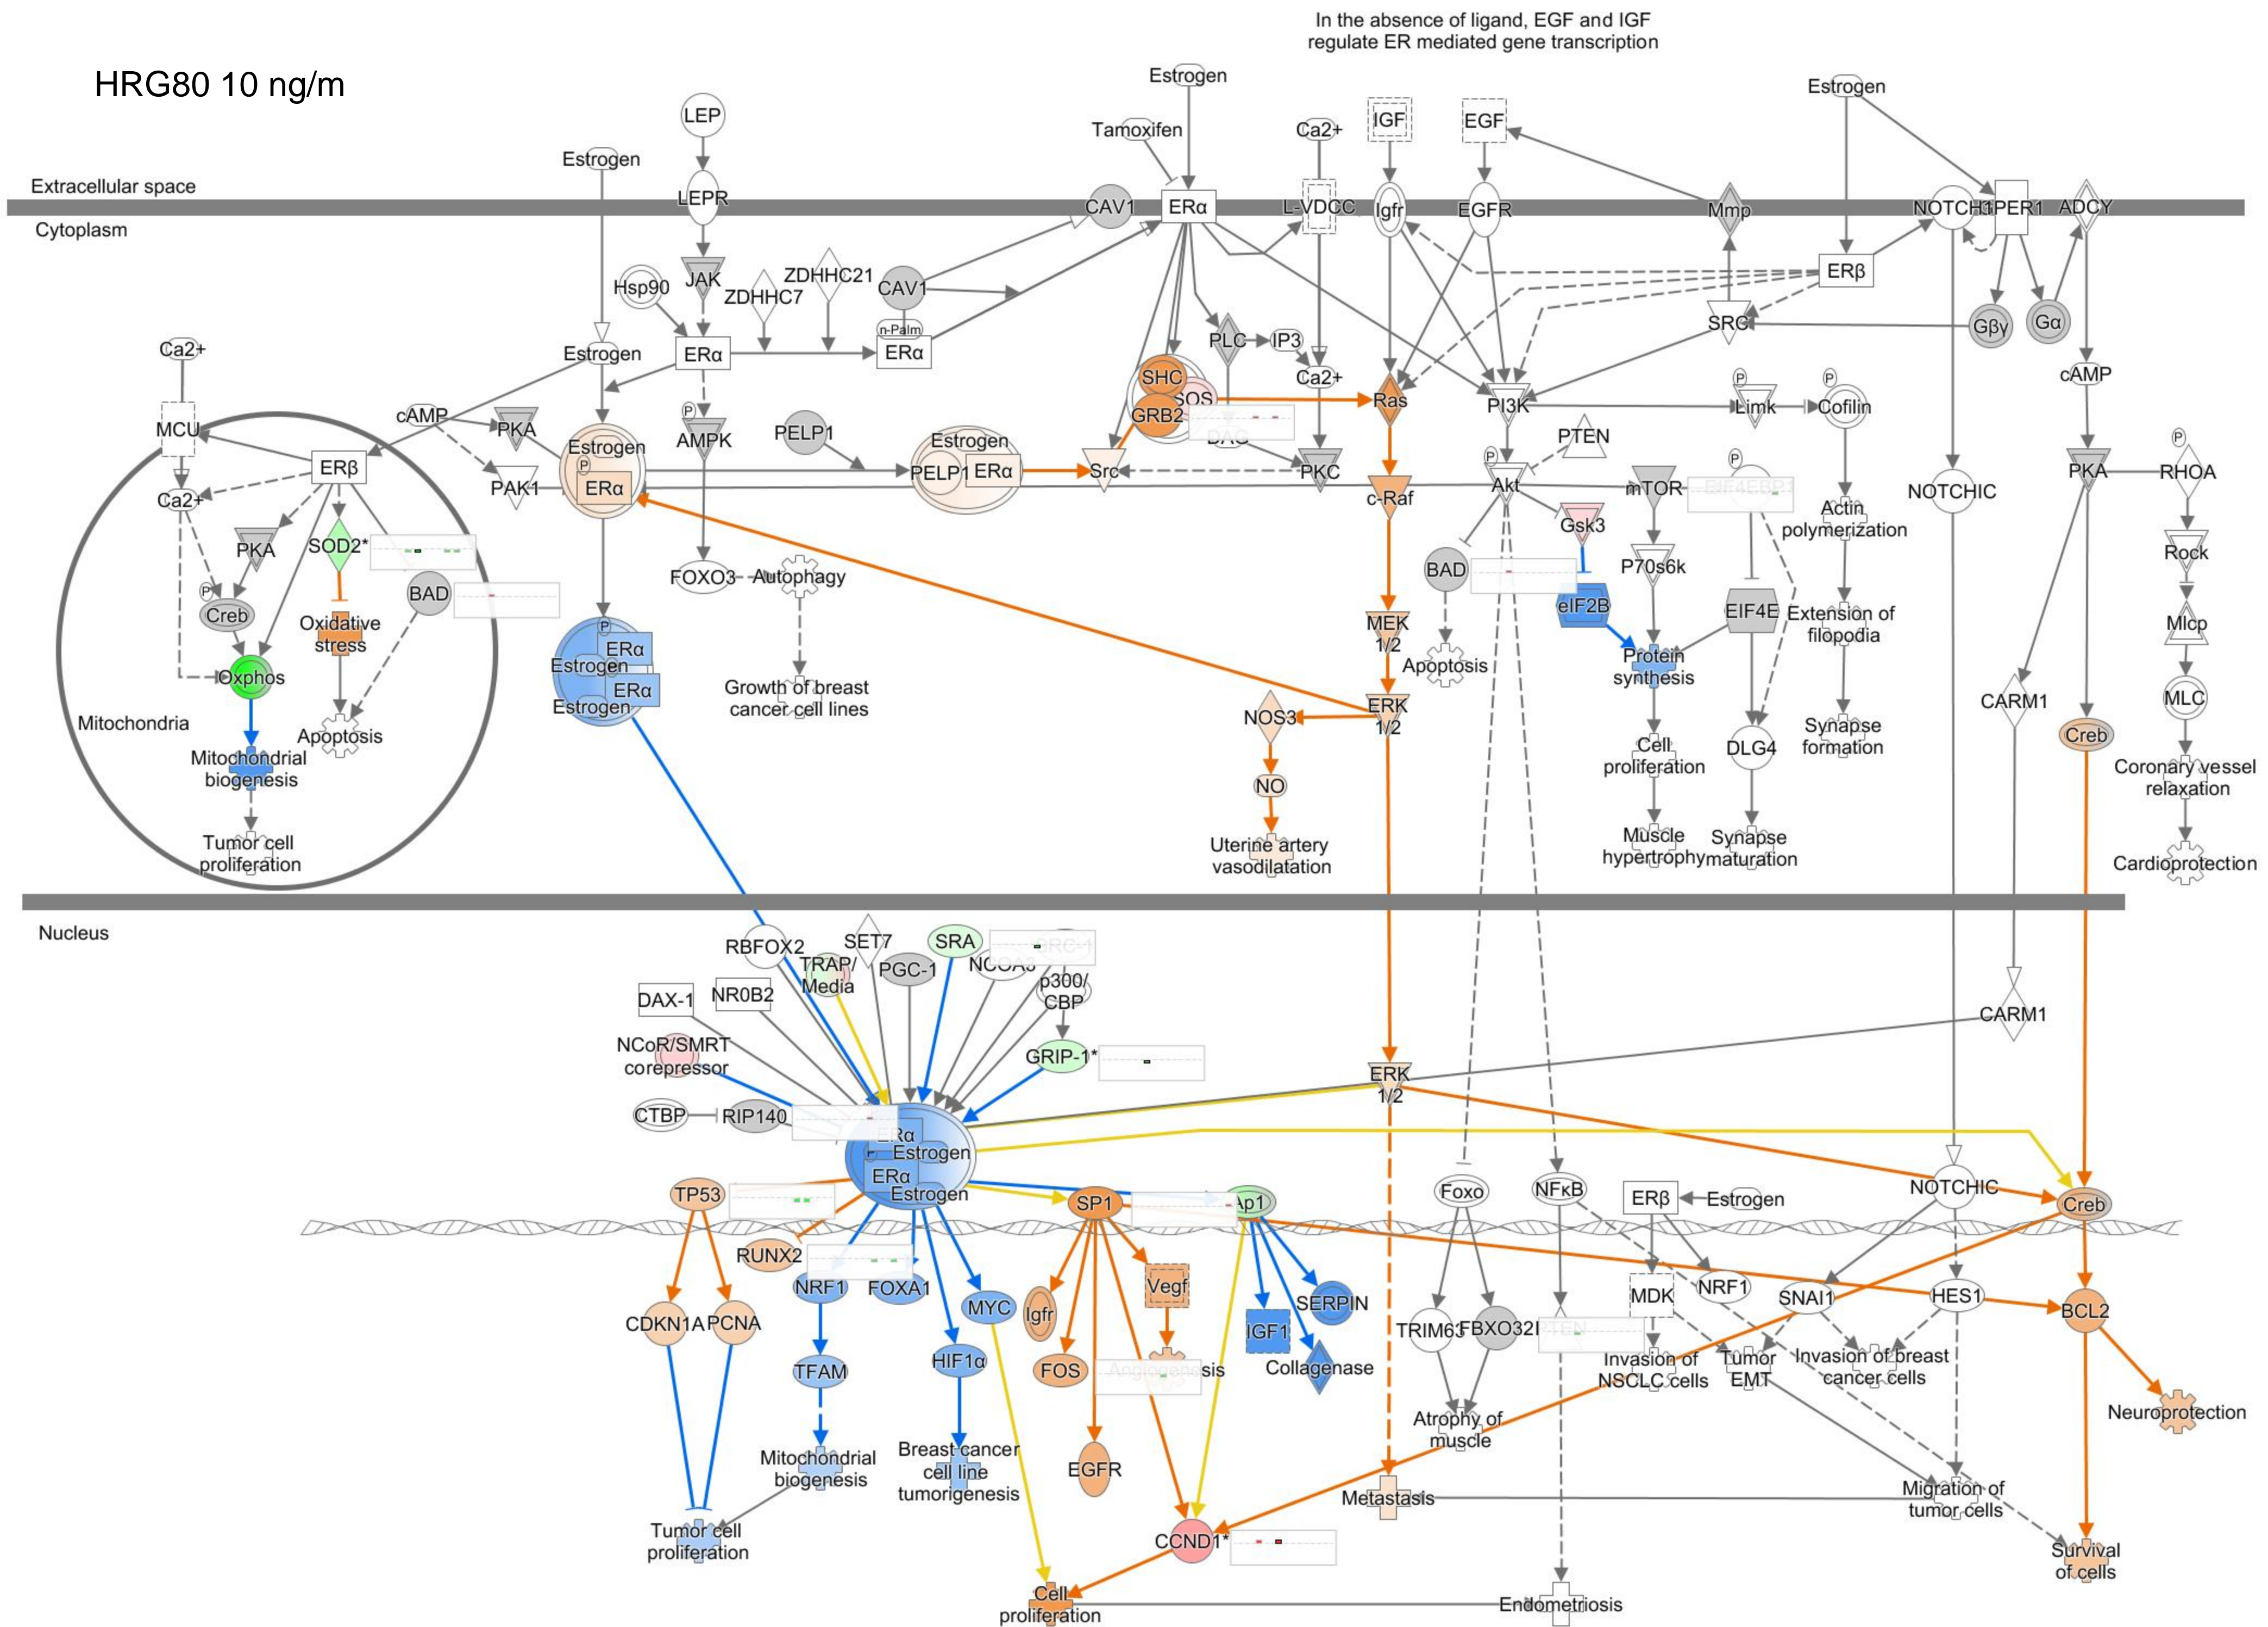



HRG80 0.01 ng/m

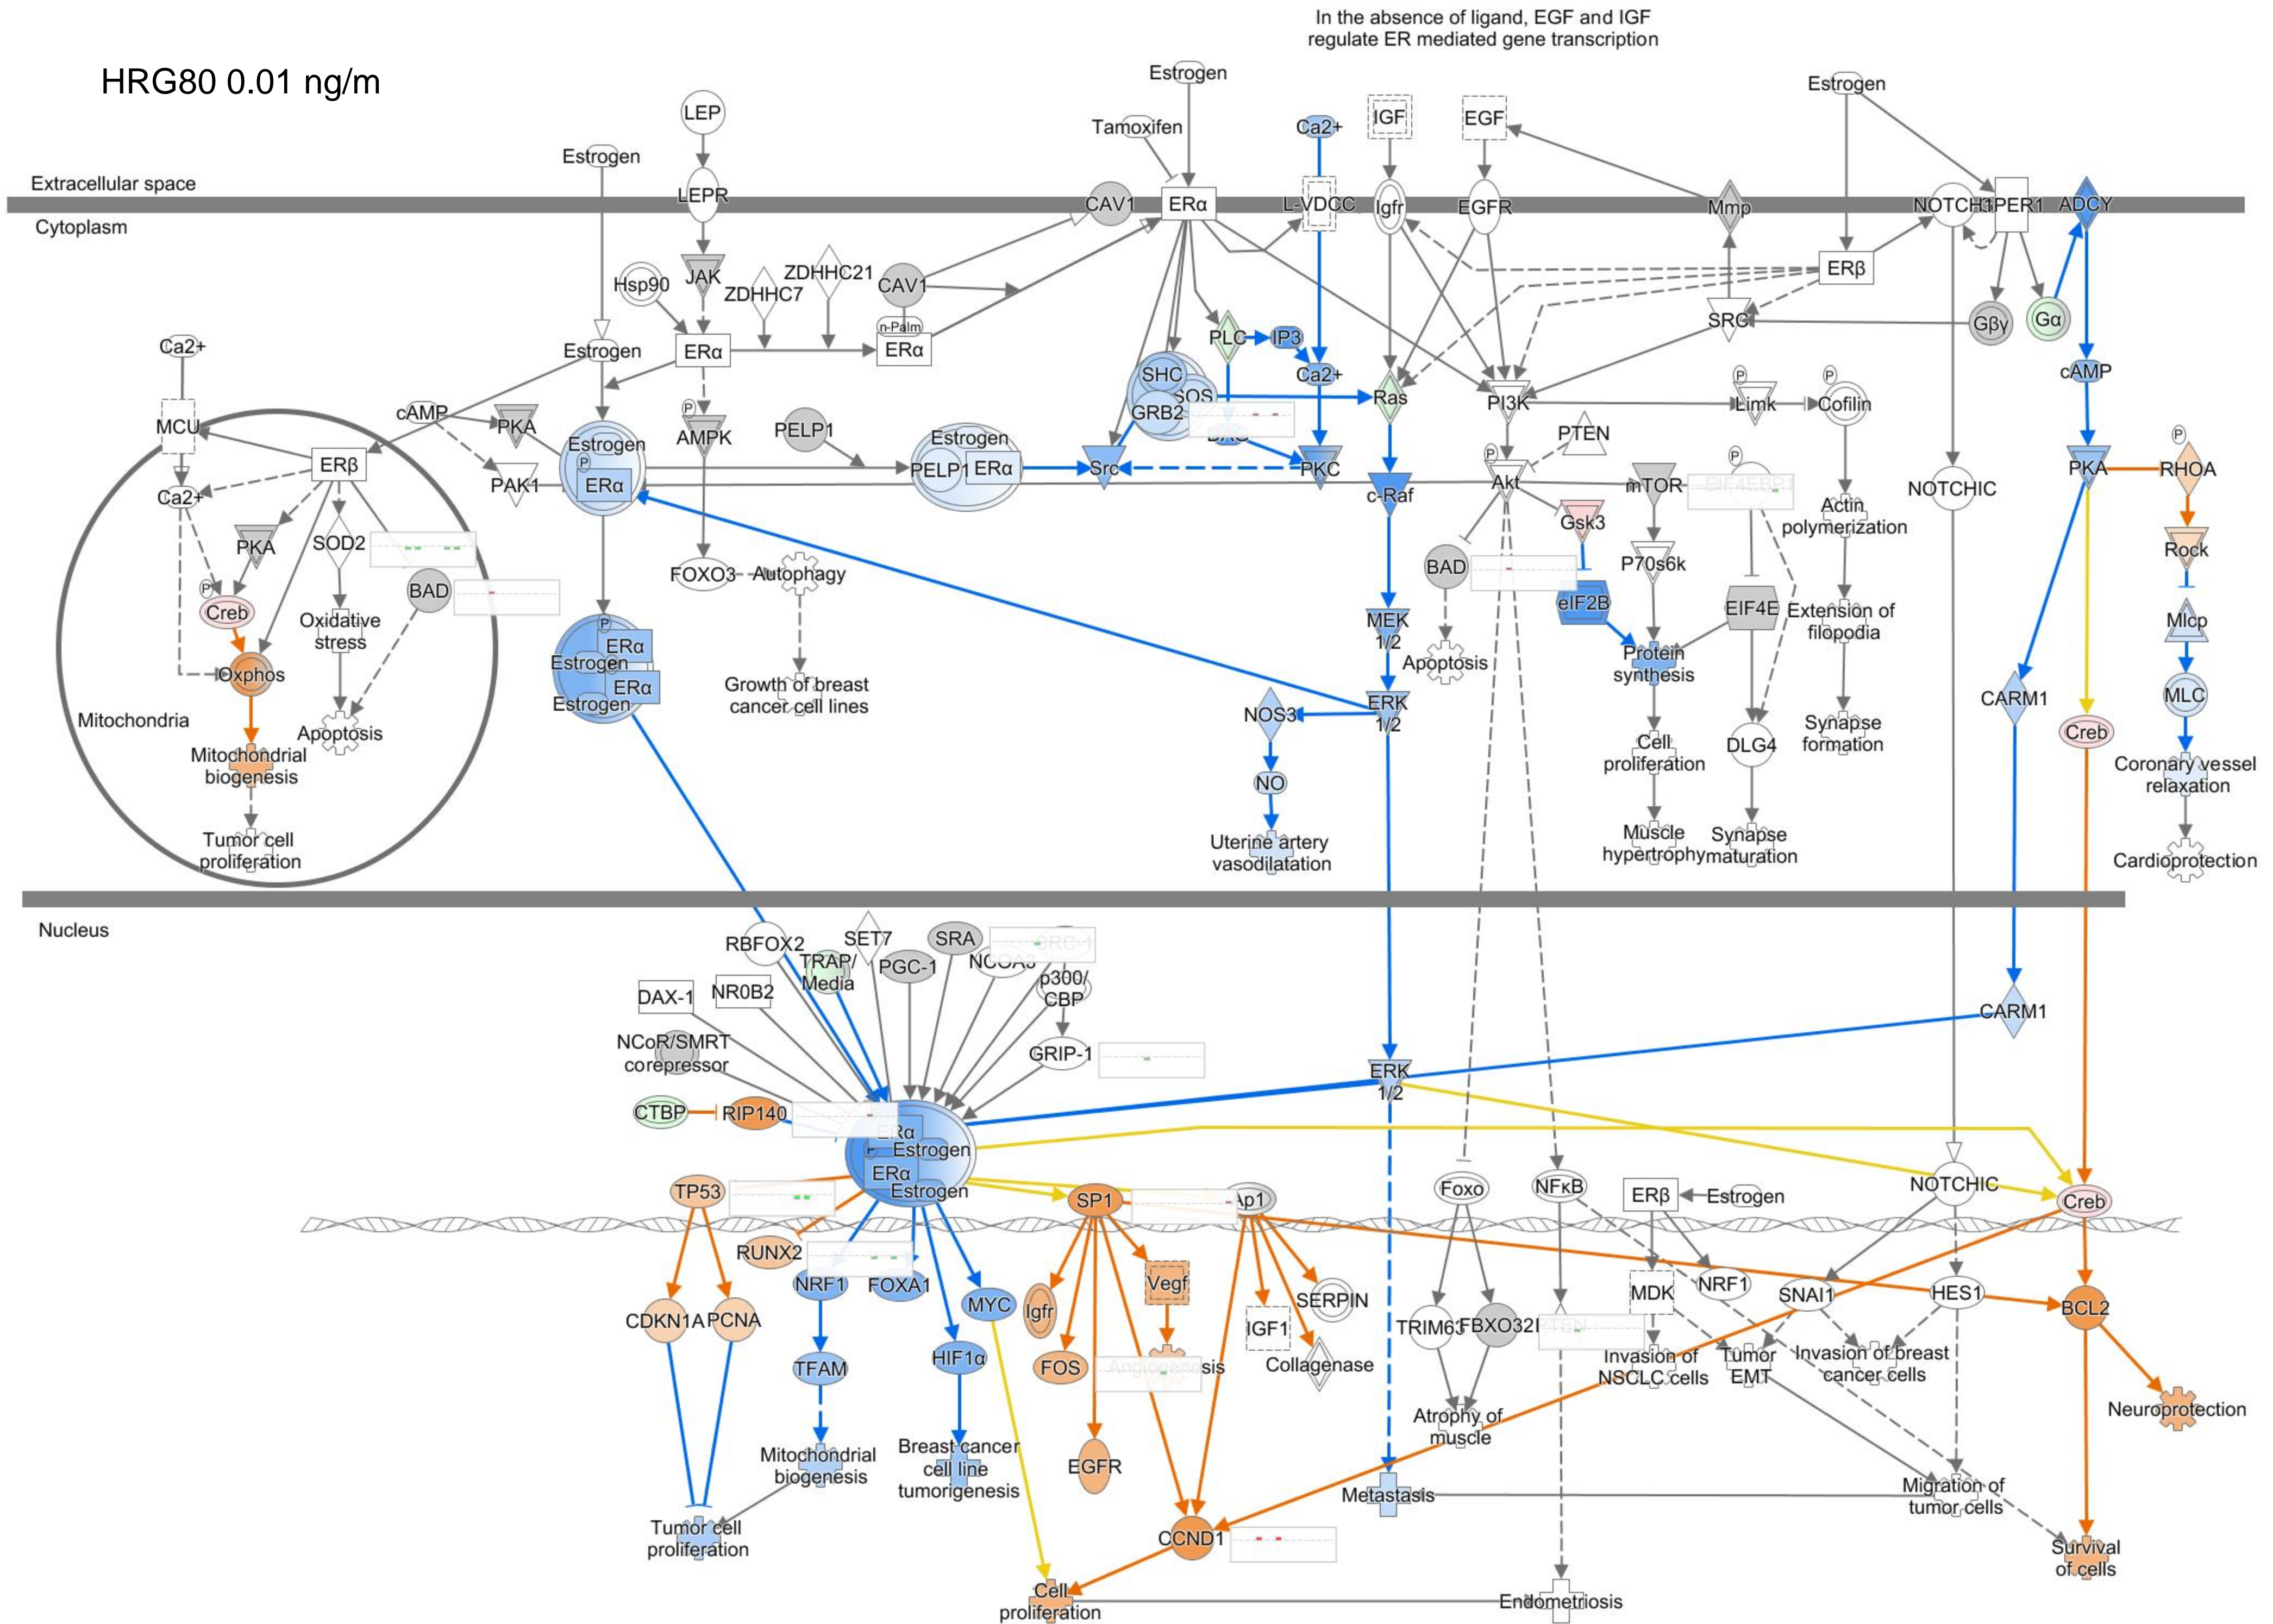



Rb1 100nM

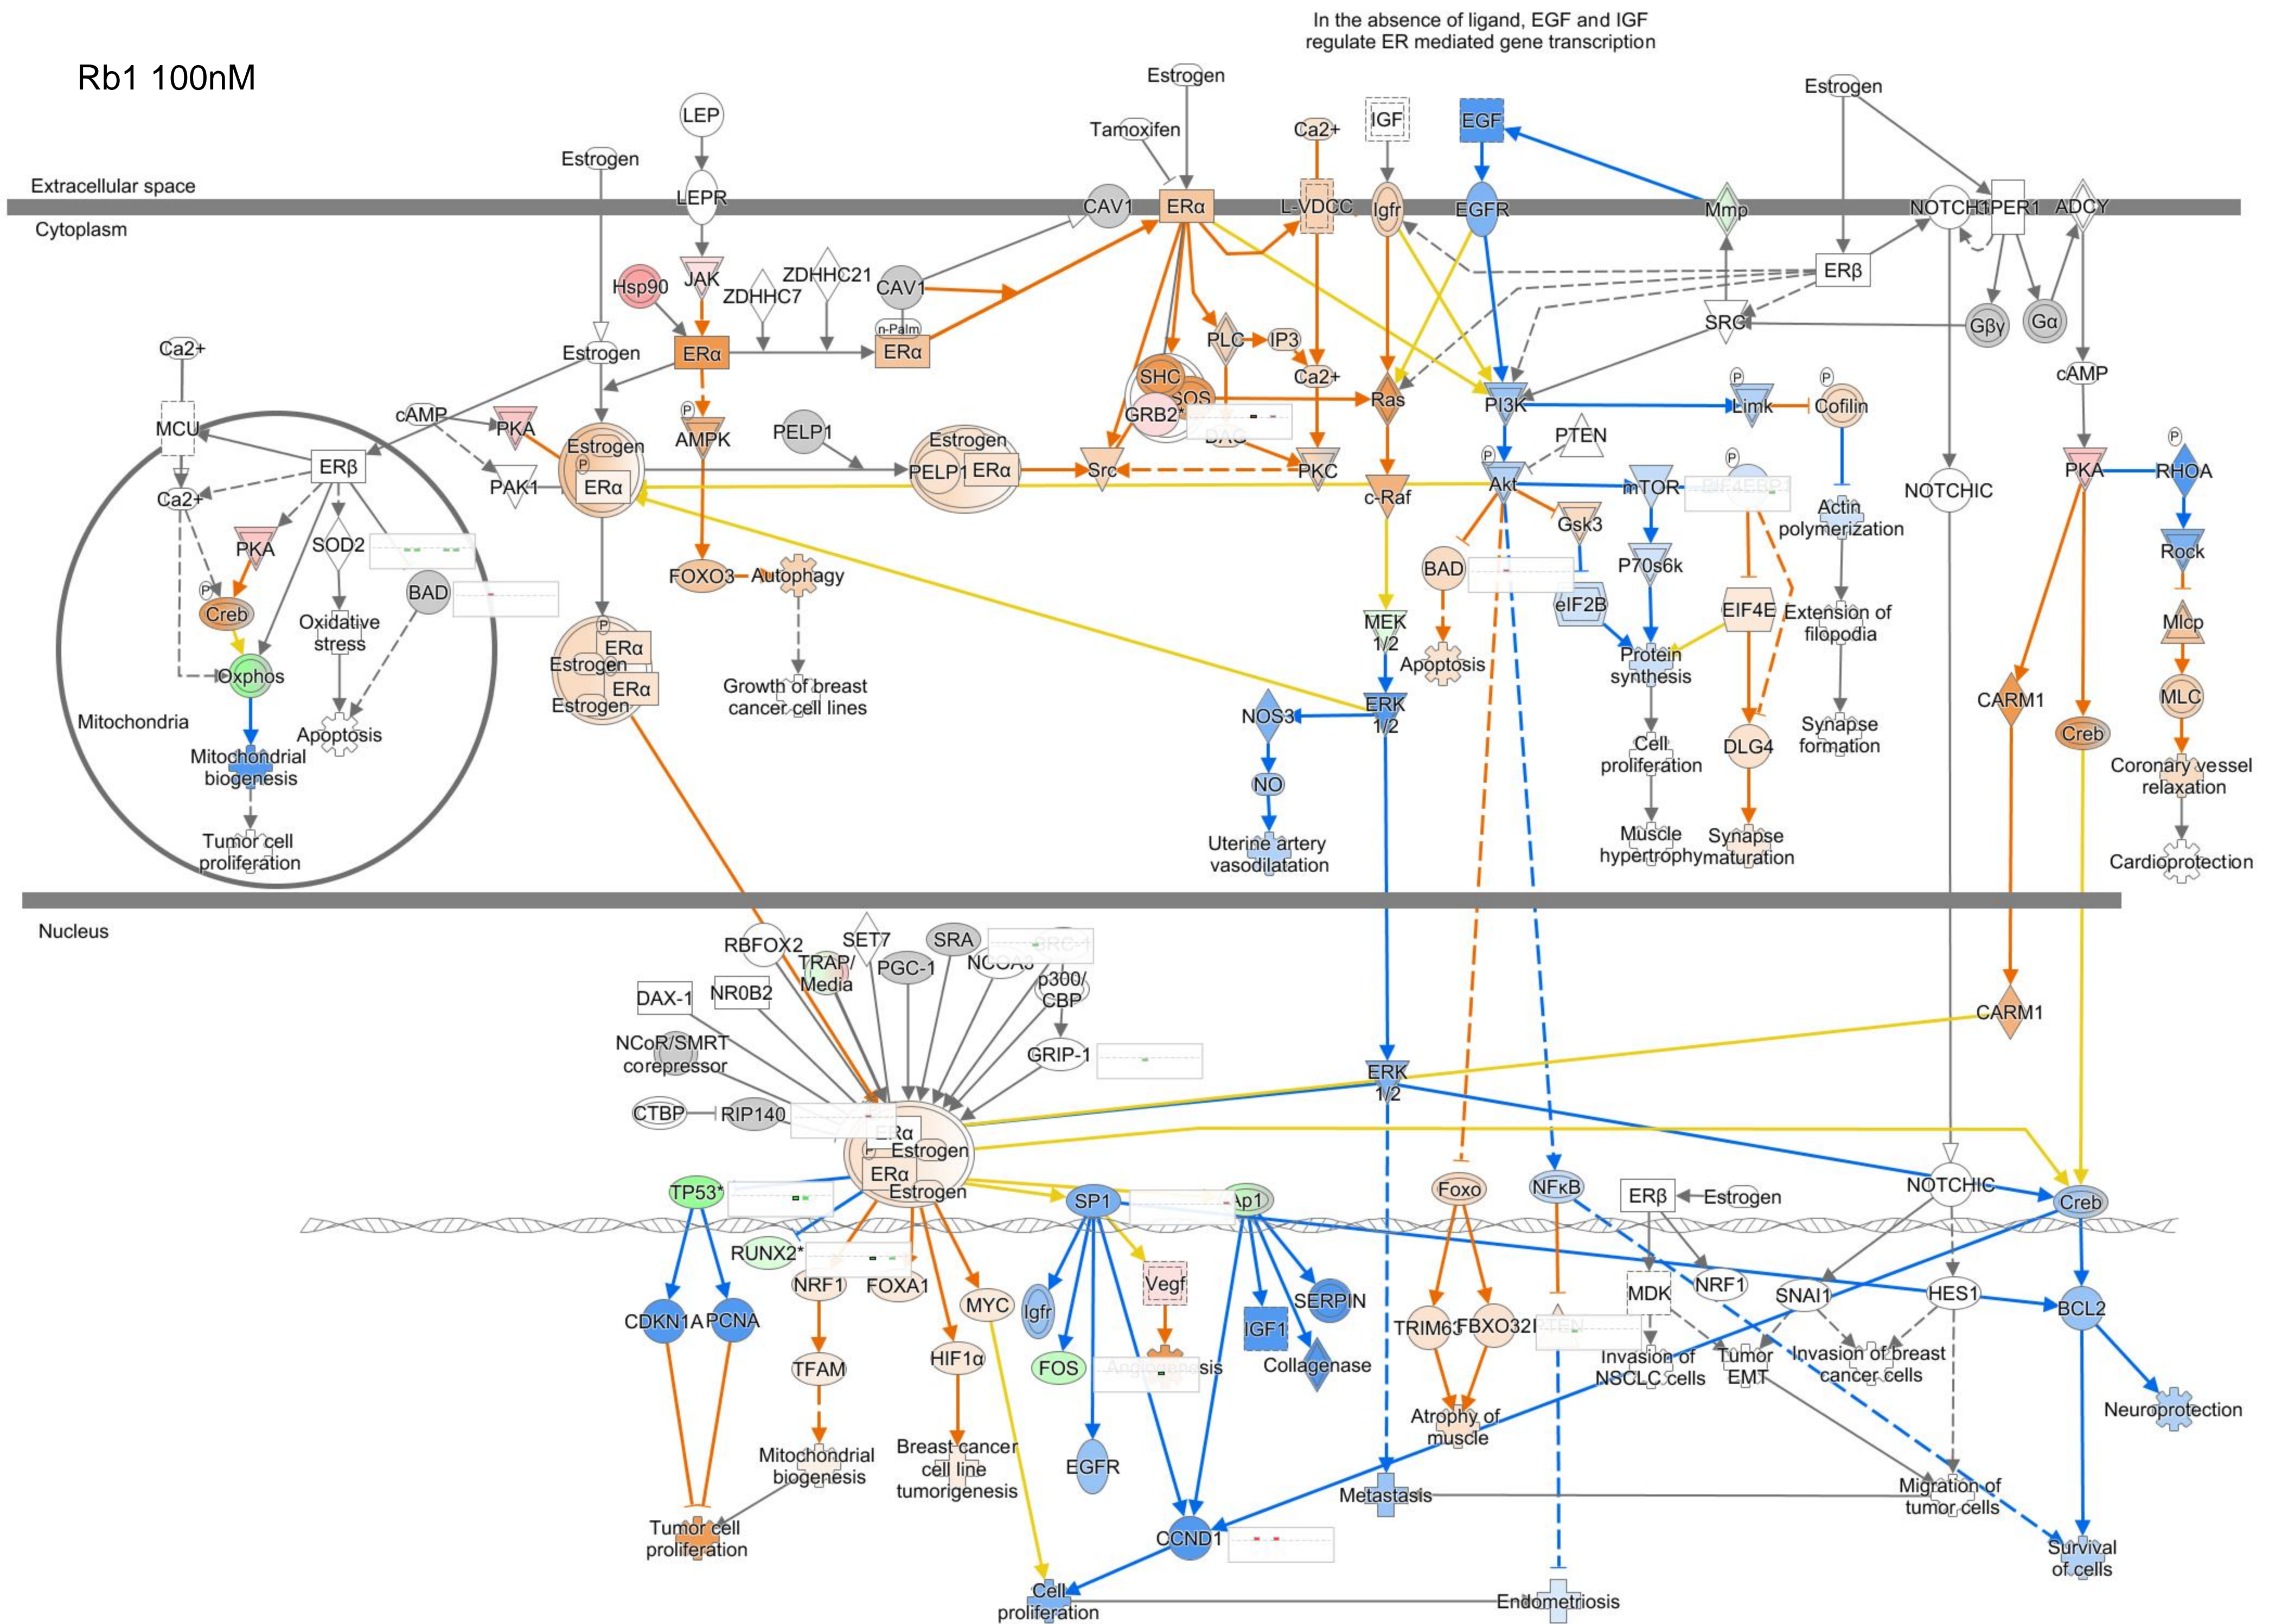



Rg3 100nM

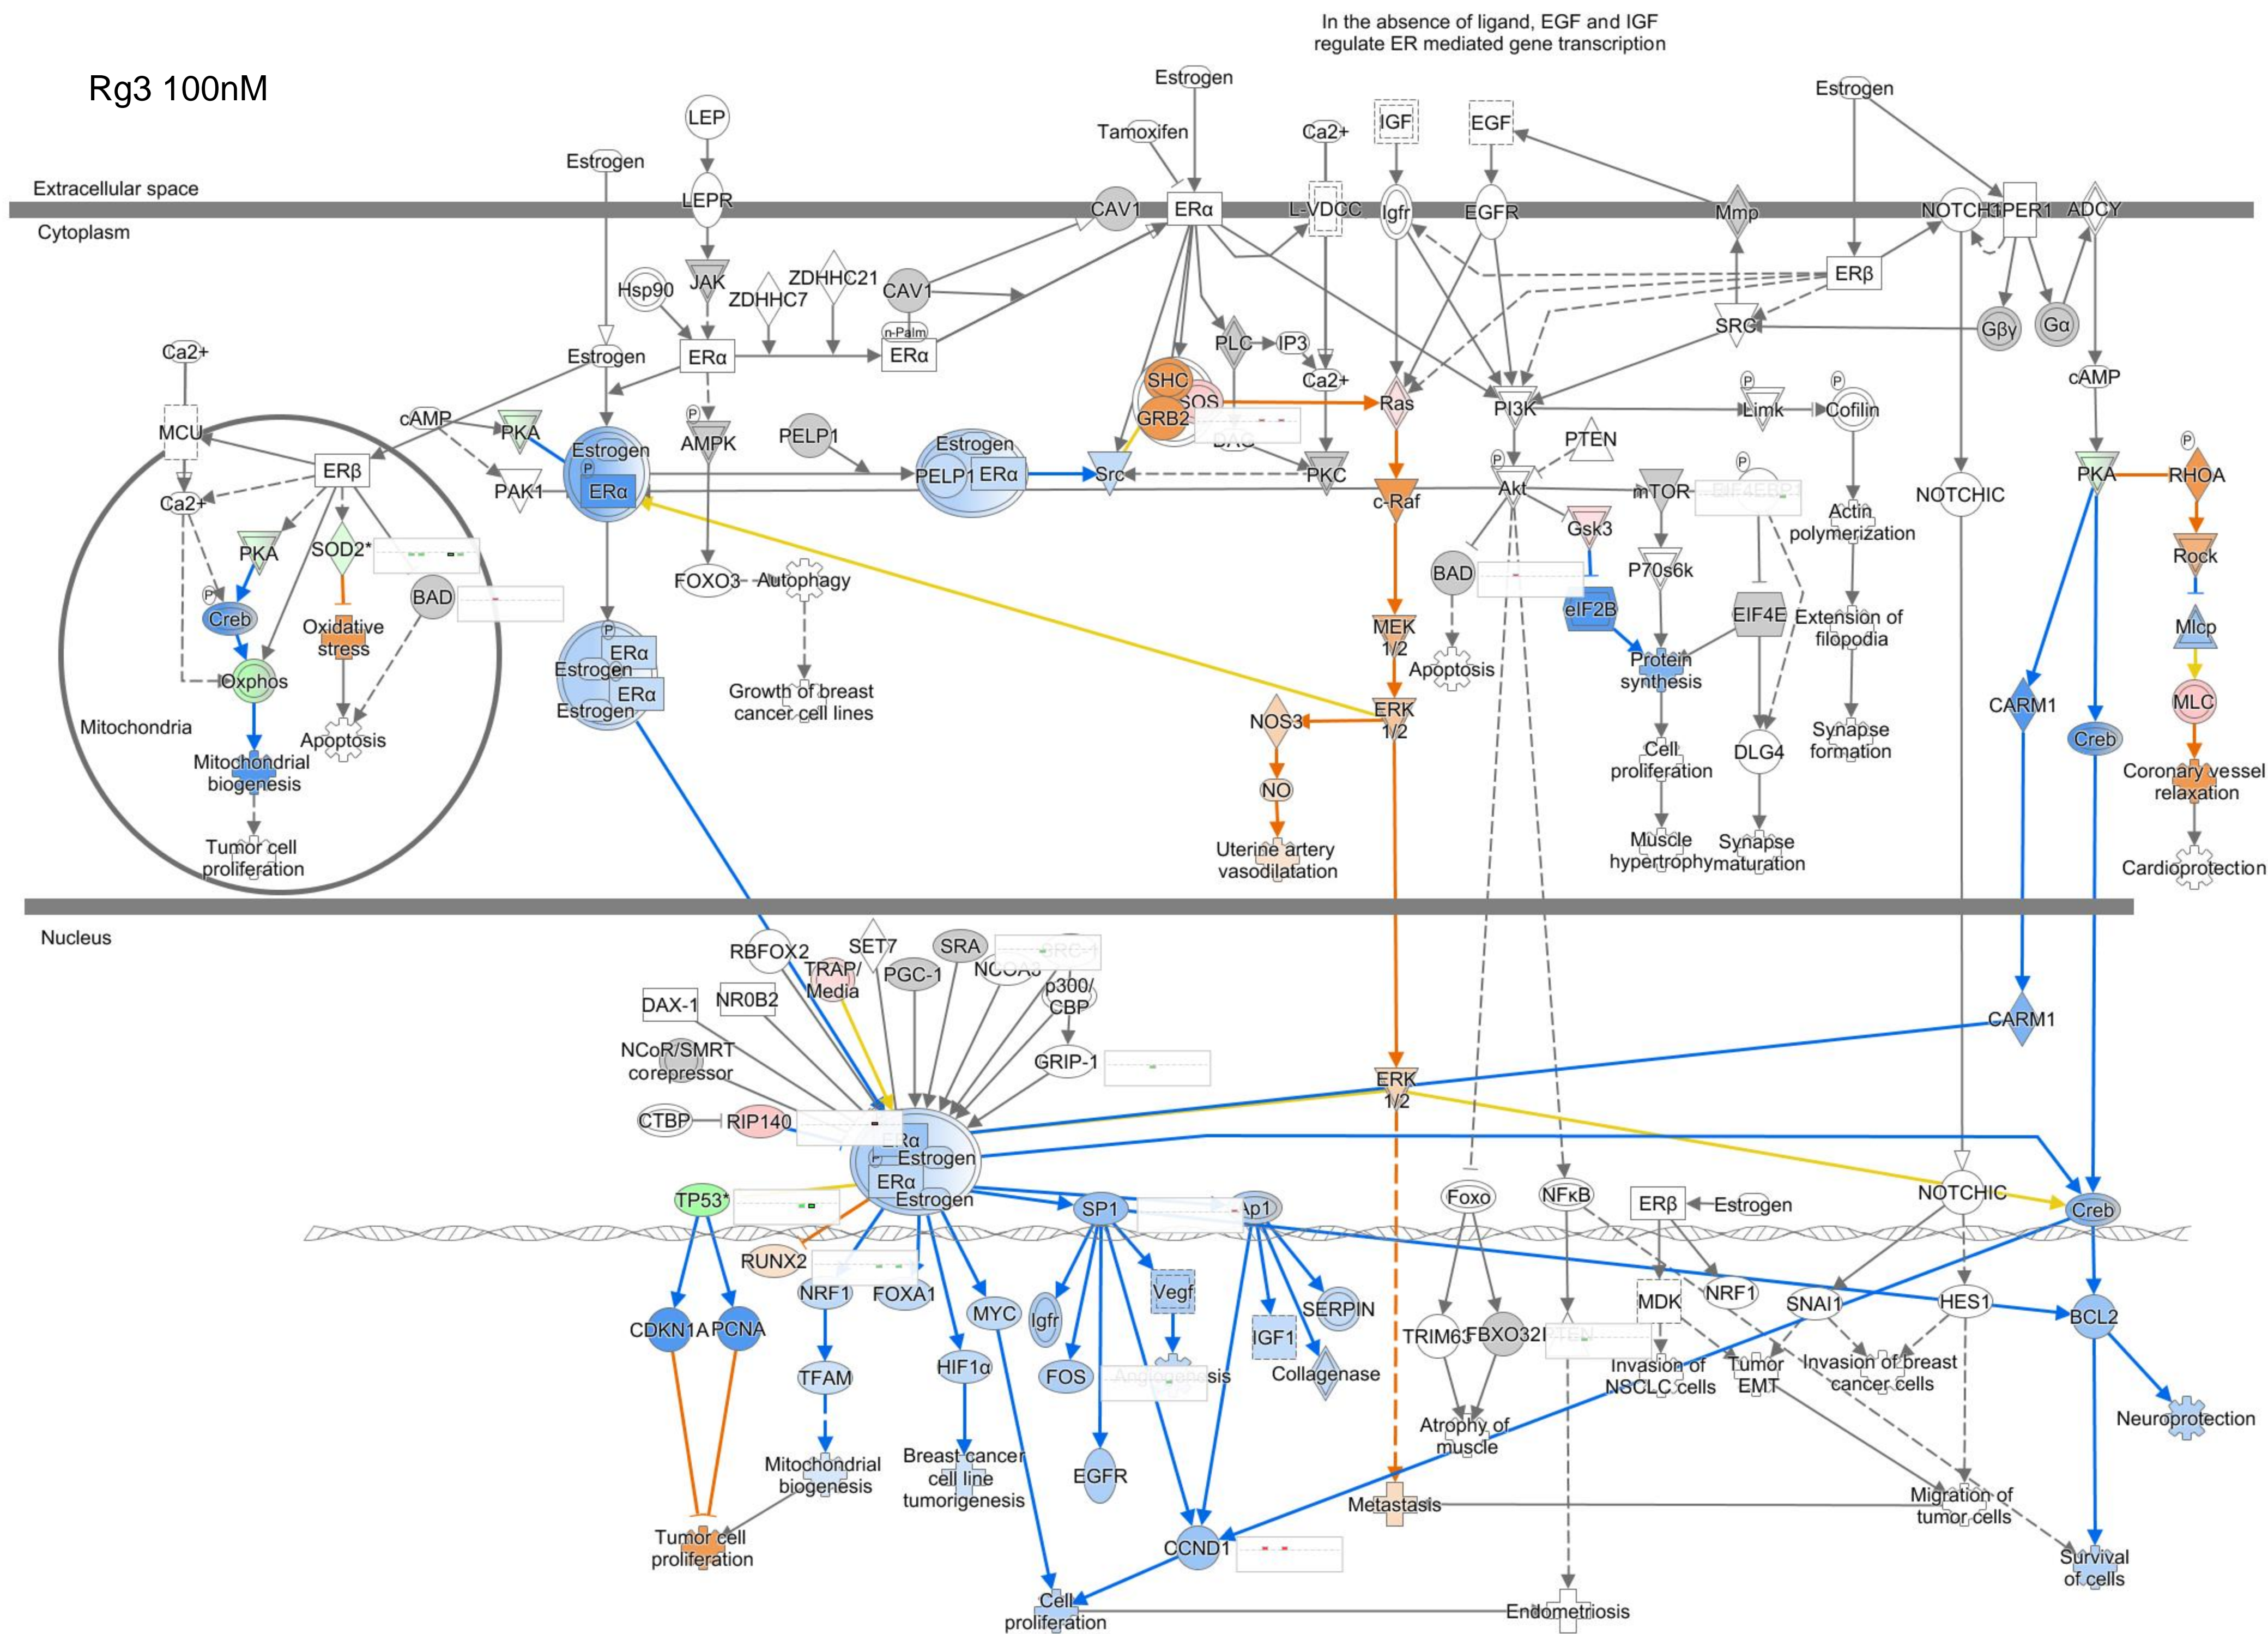



Rg5 100nM

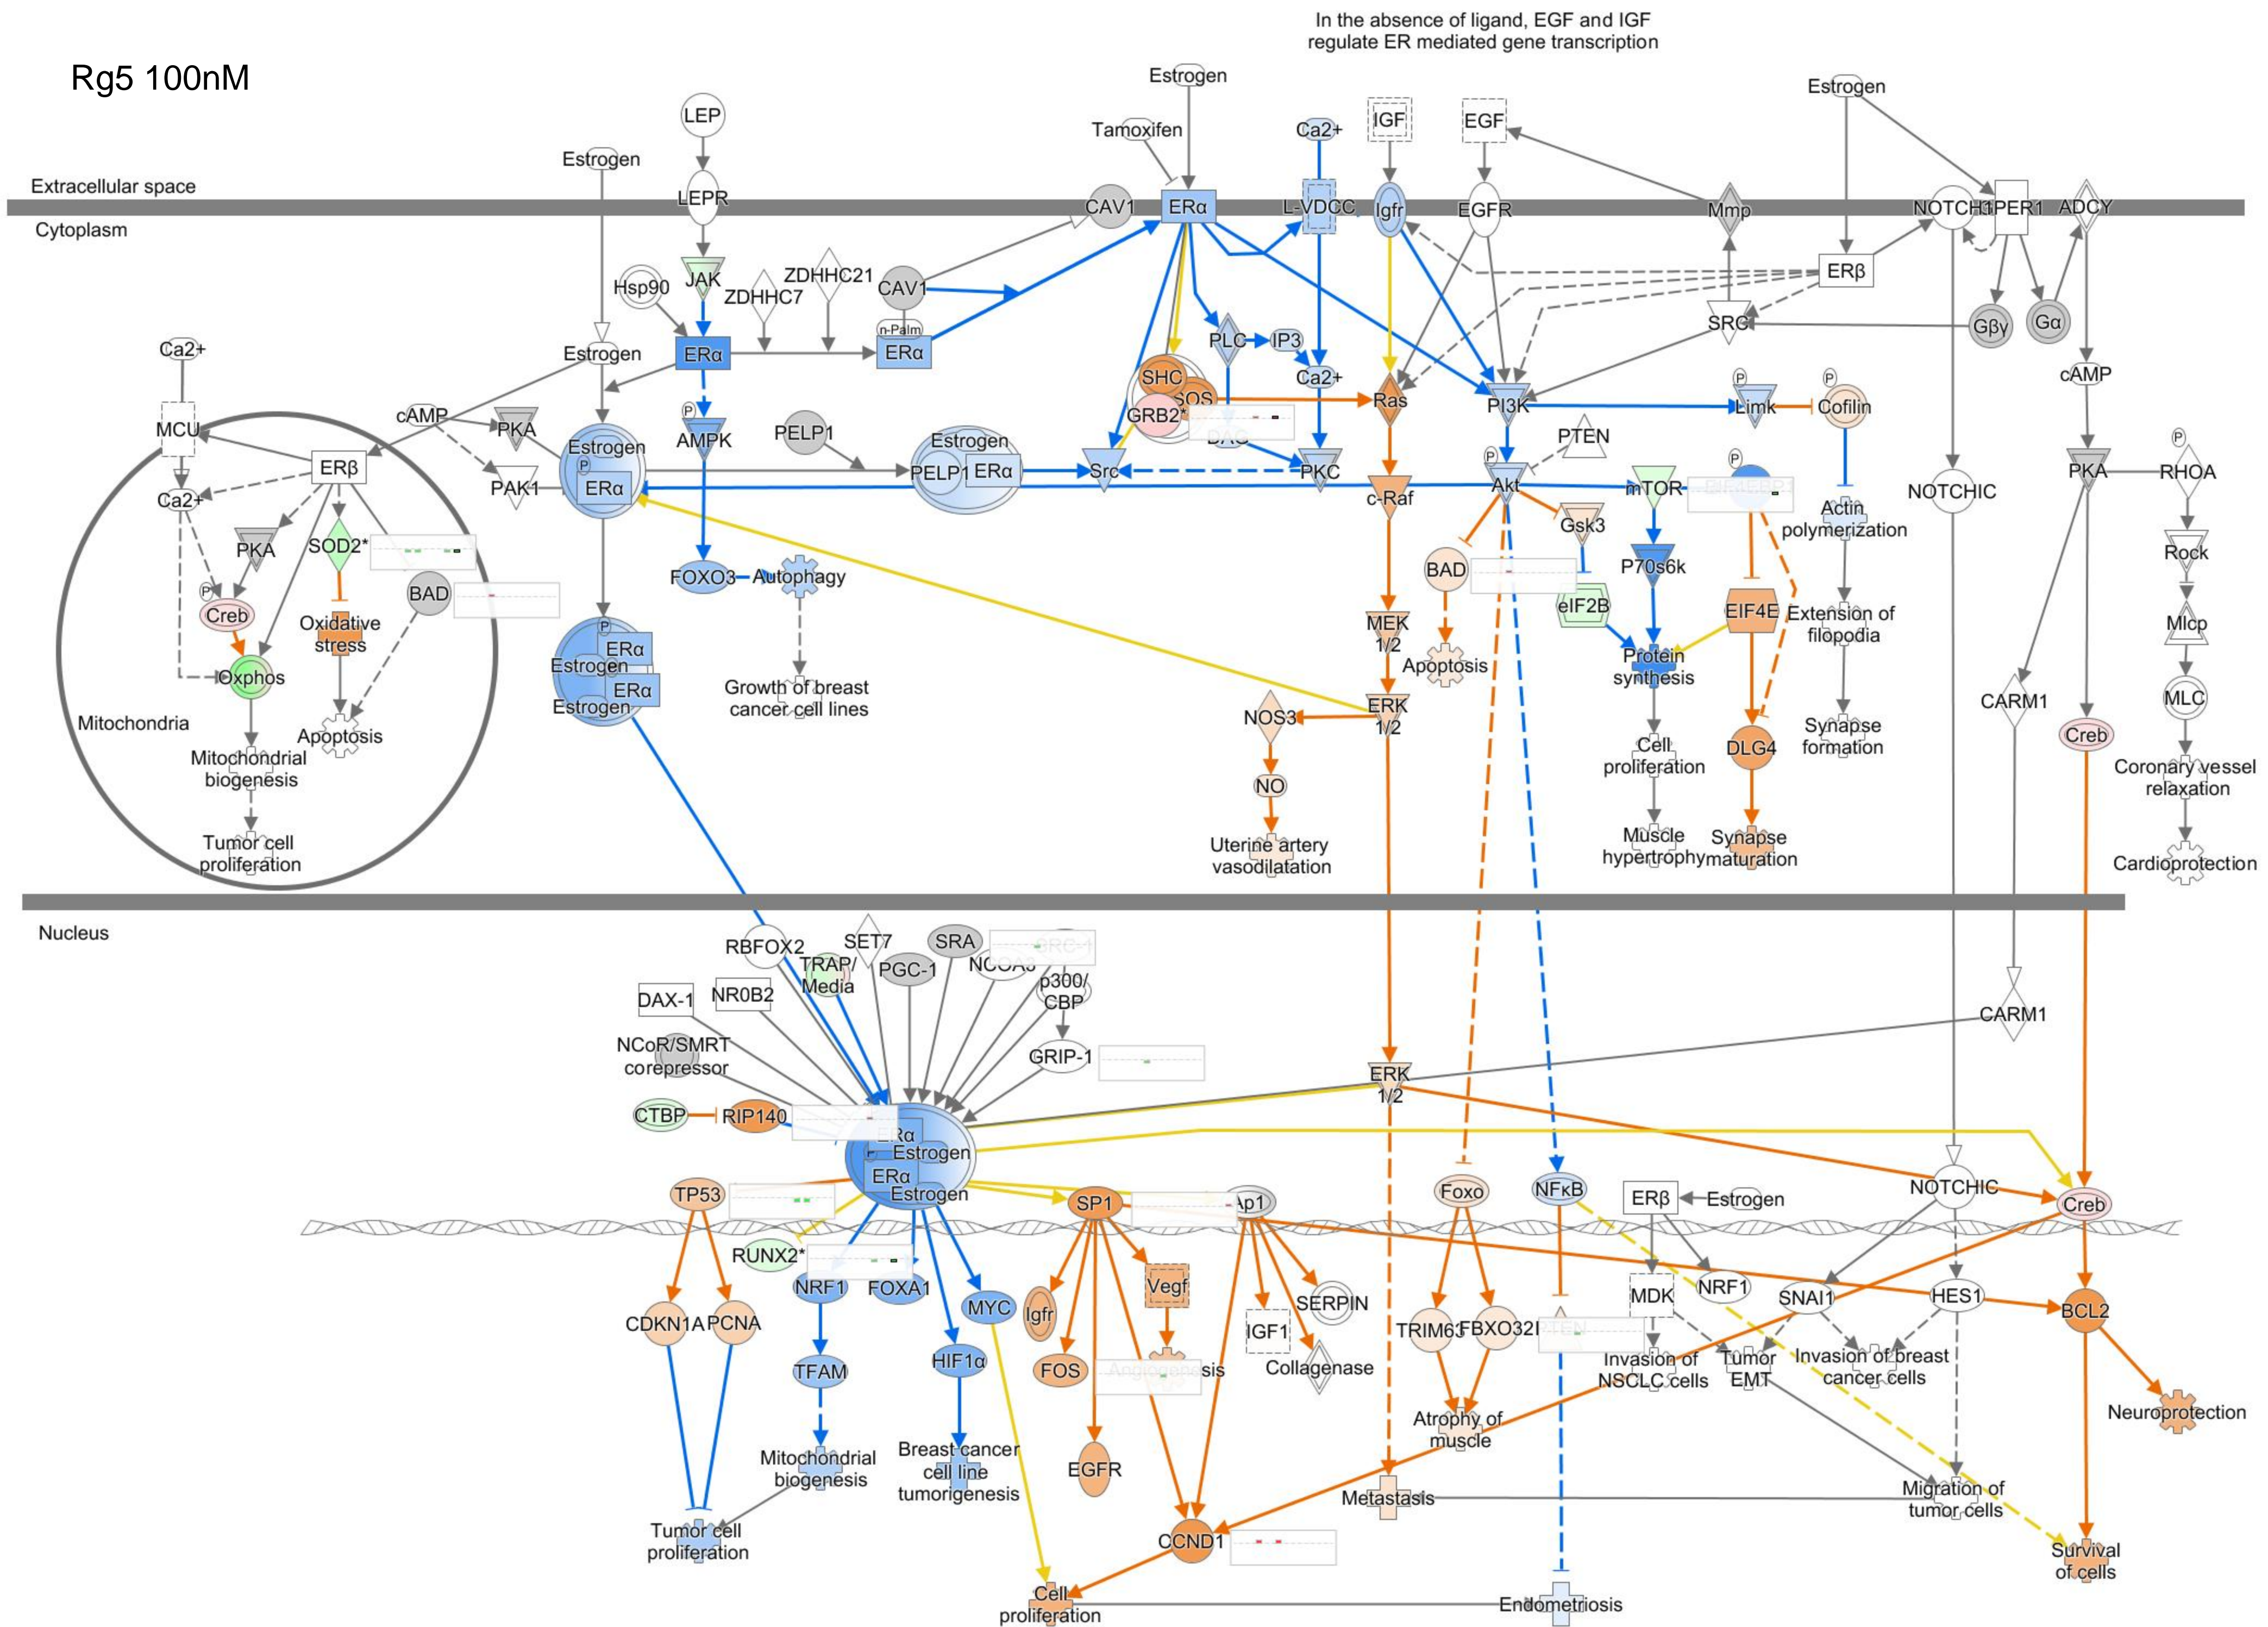



Rk1 100nM

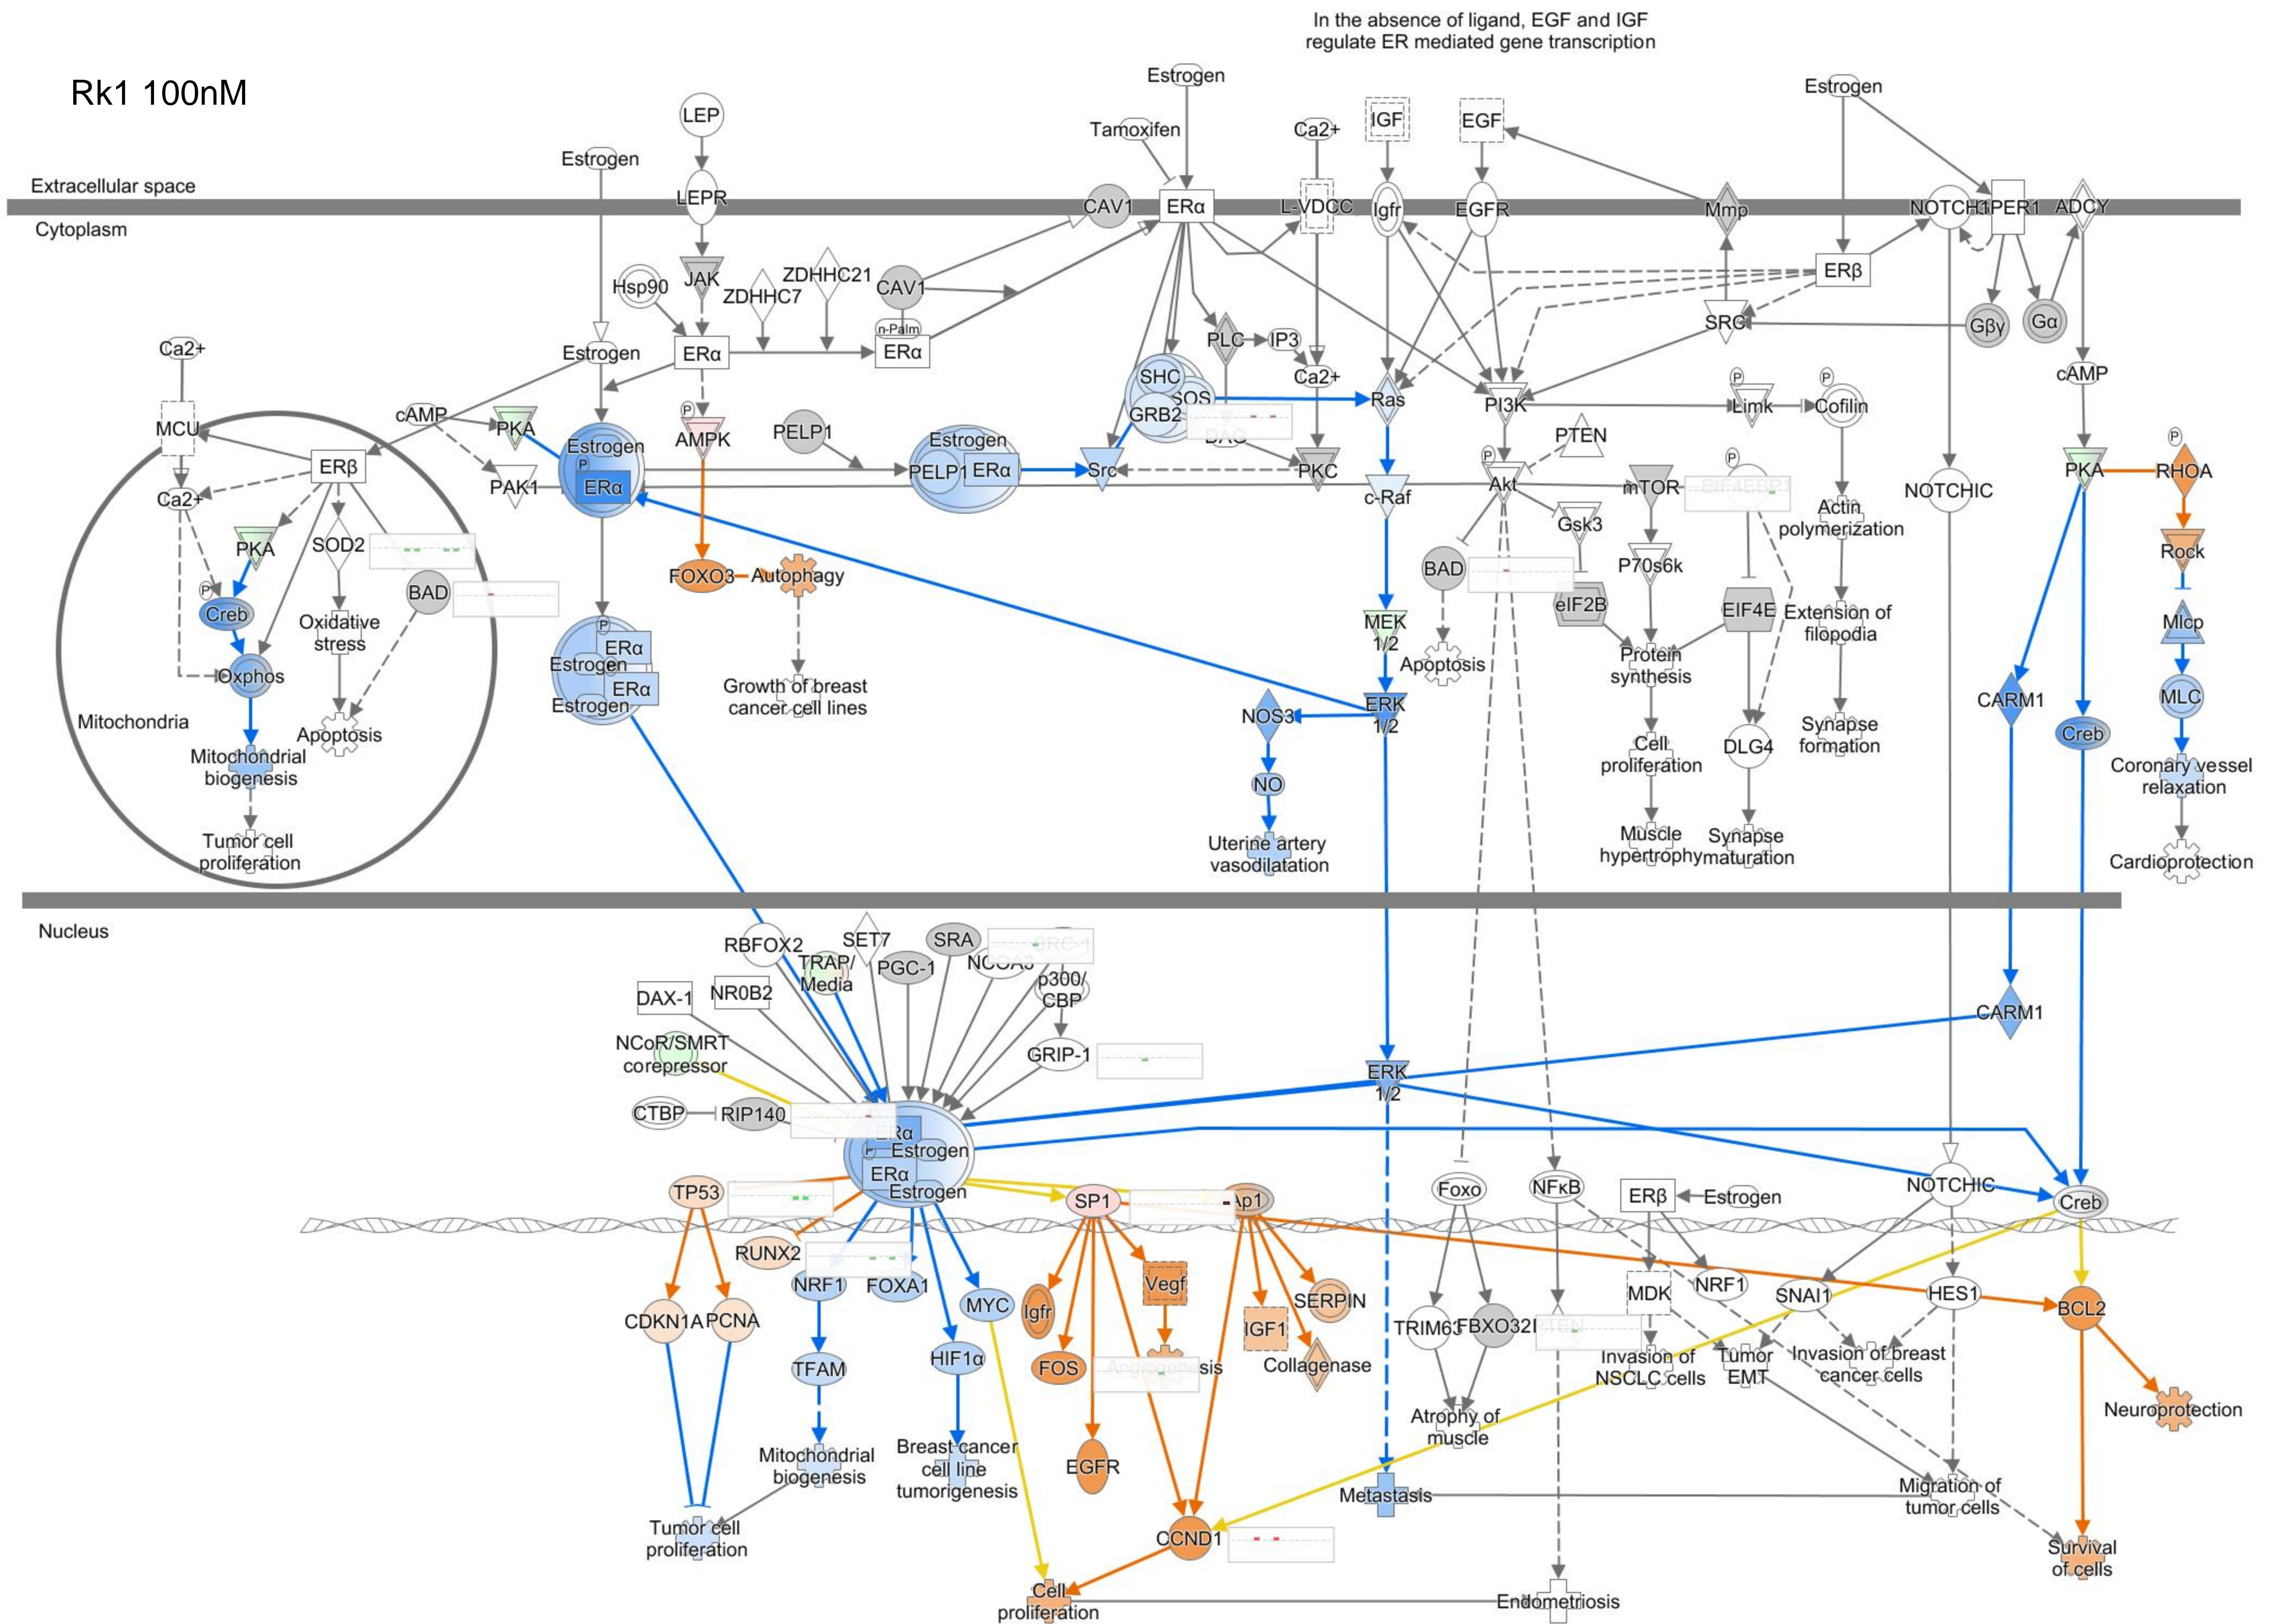

Supplement: Supplementary file 3 [file supplementary]

WG 10000 ng/ml

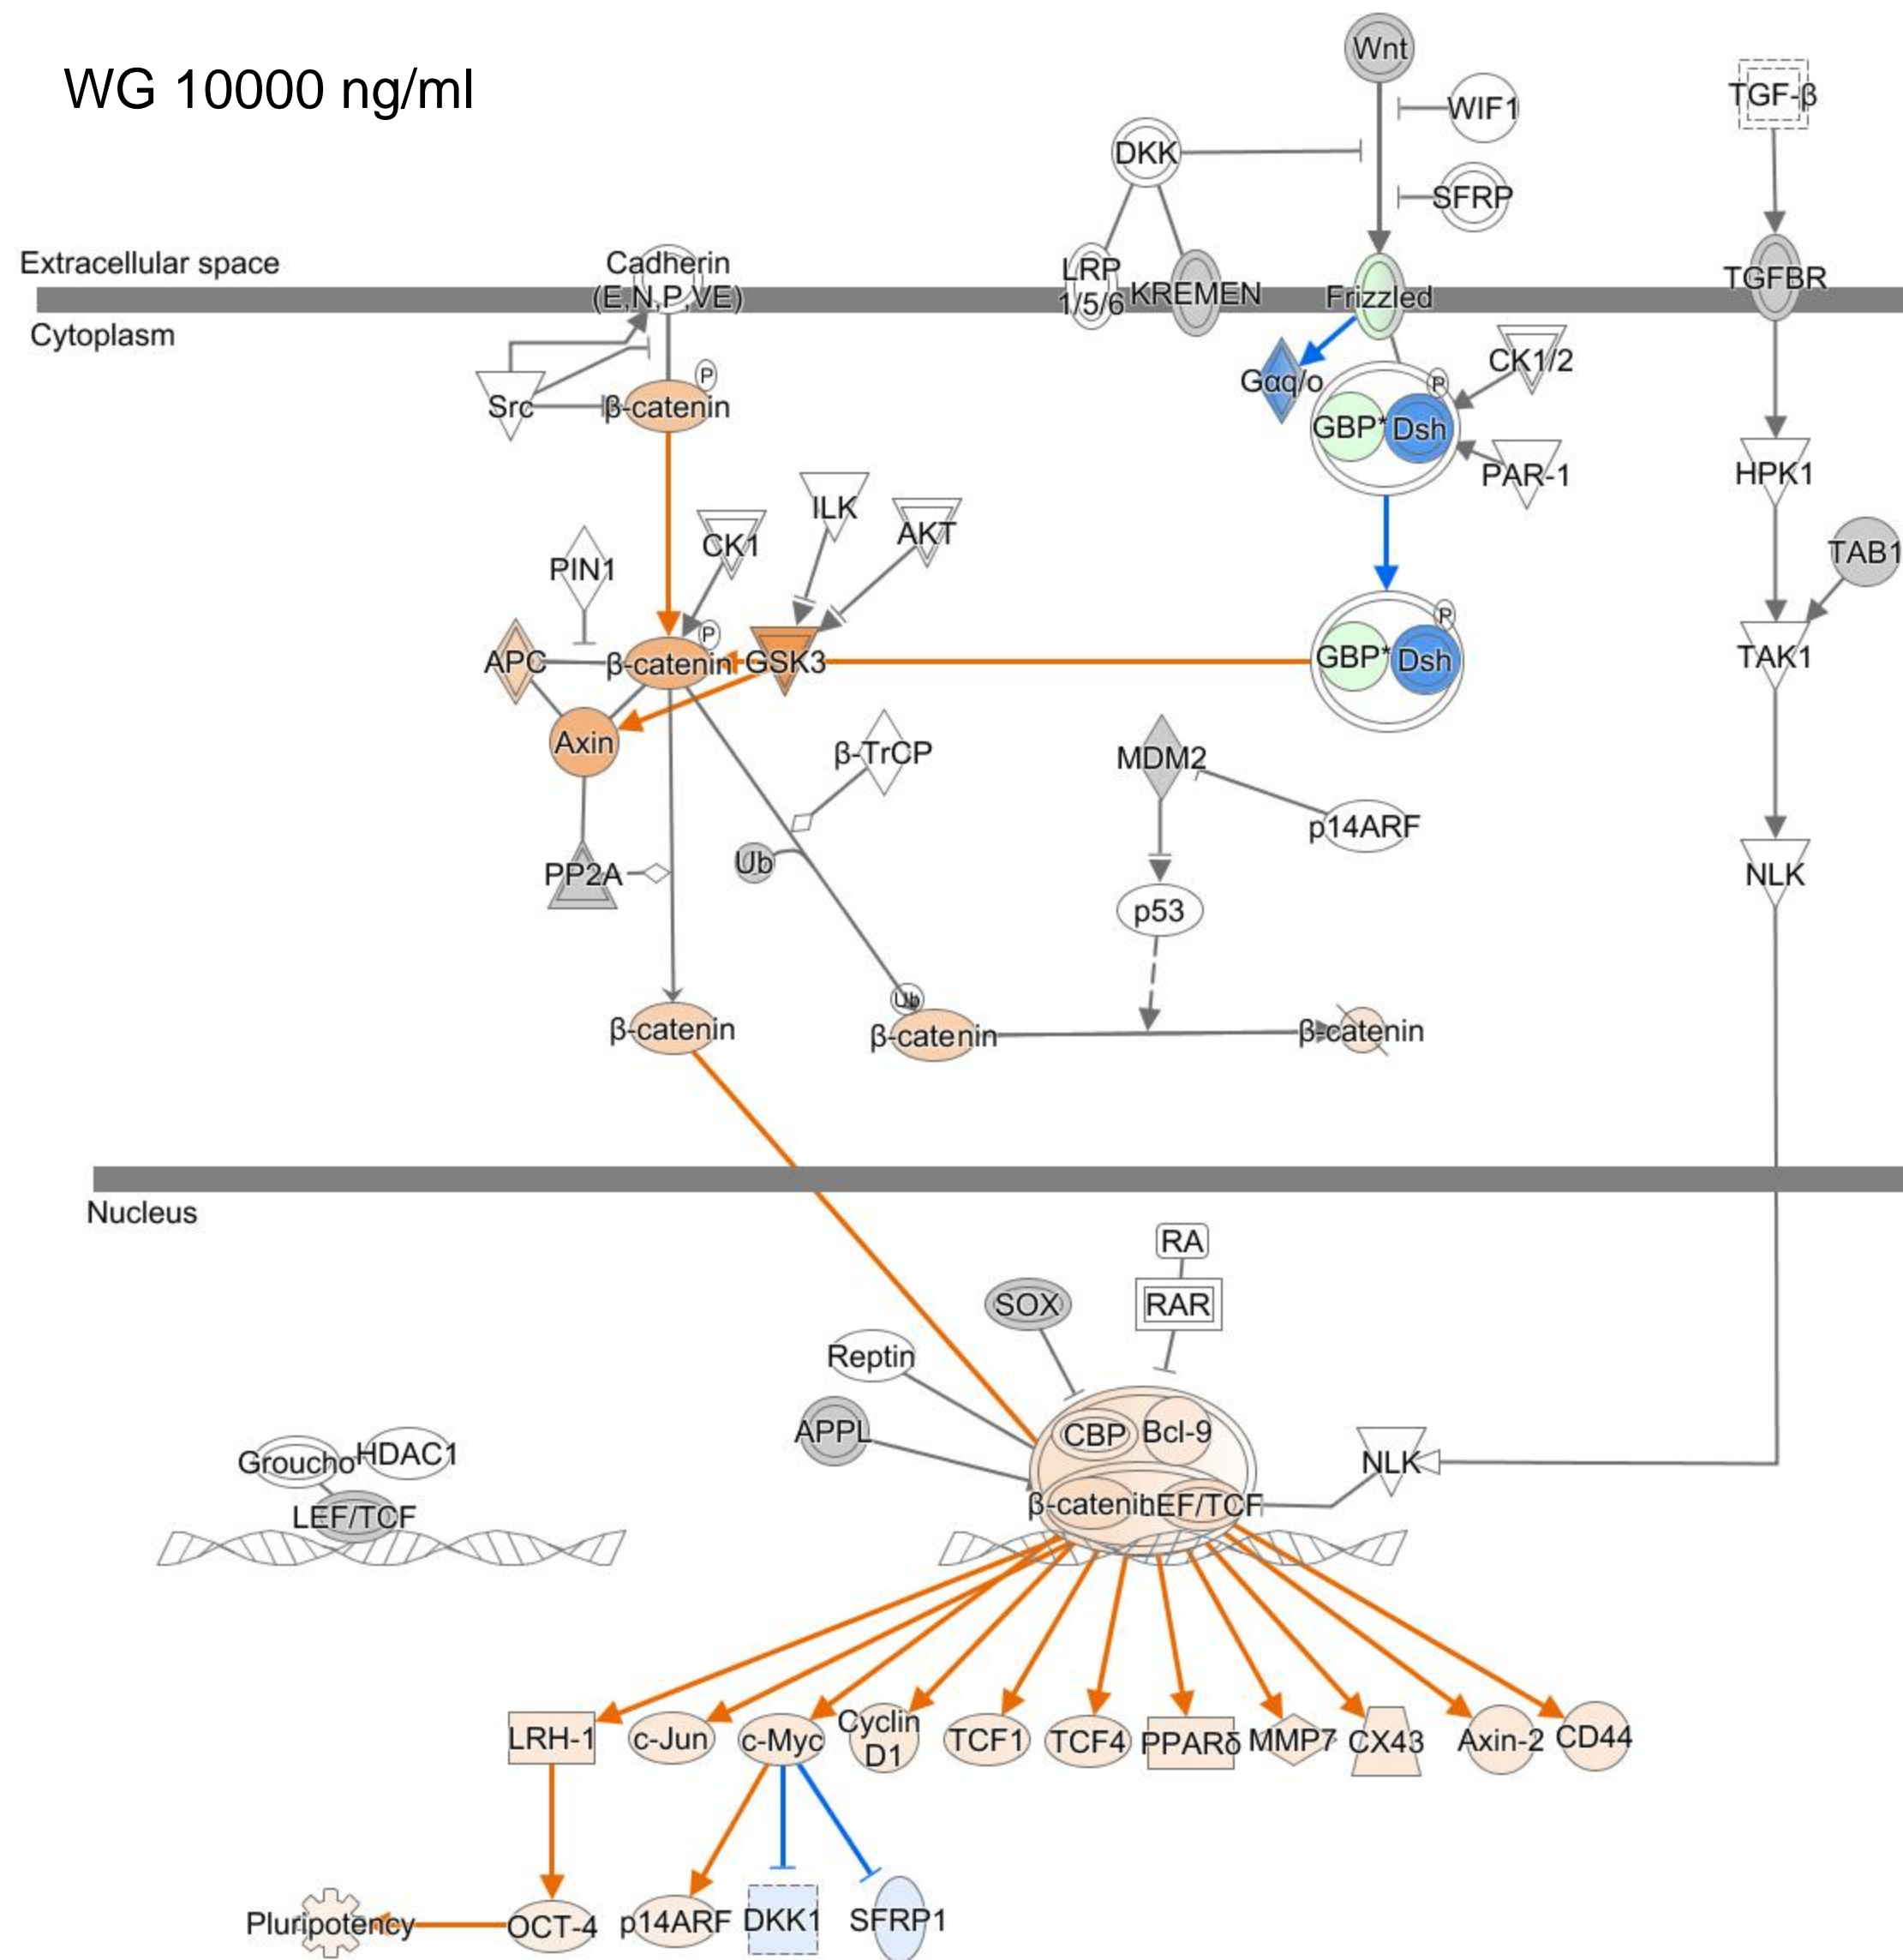

HRG80 10000 ng/ml

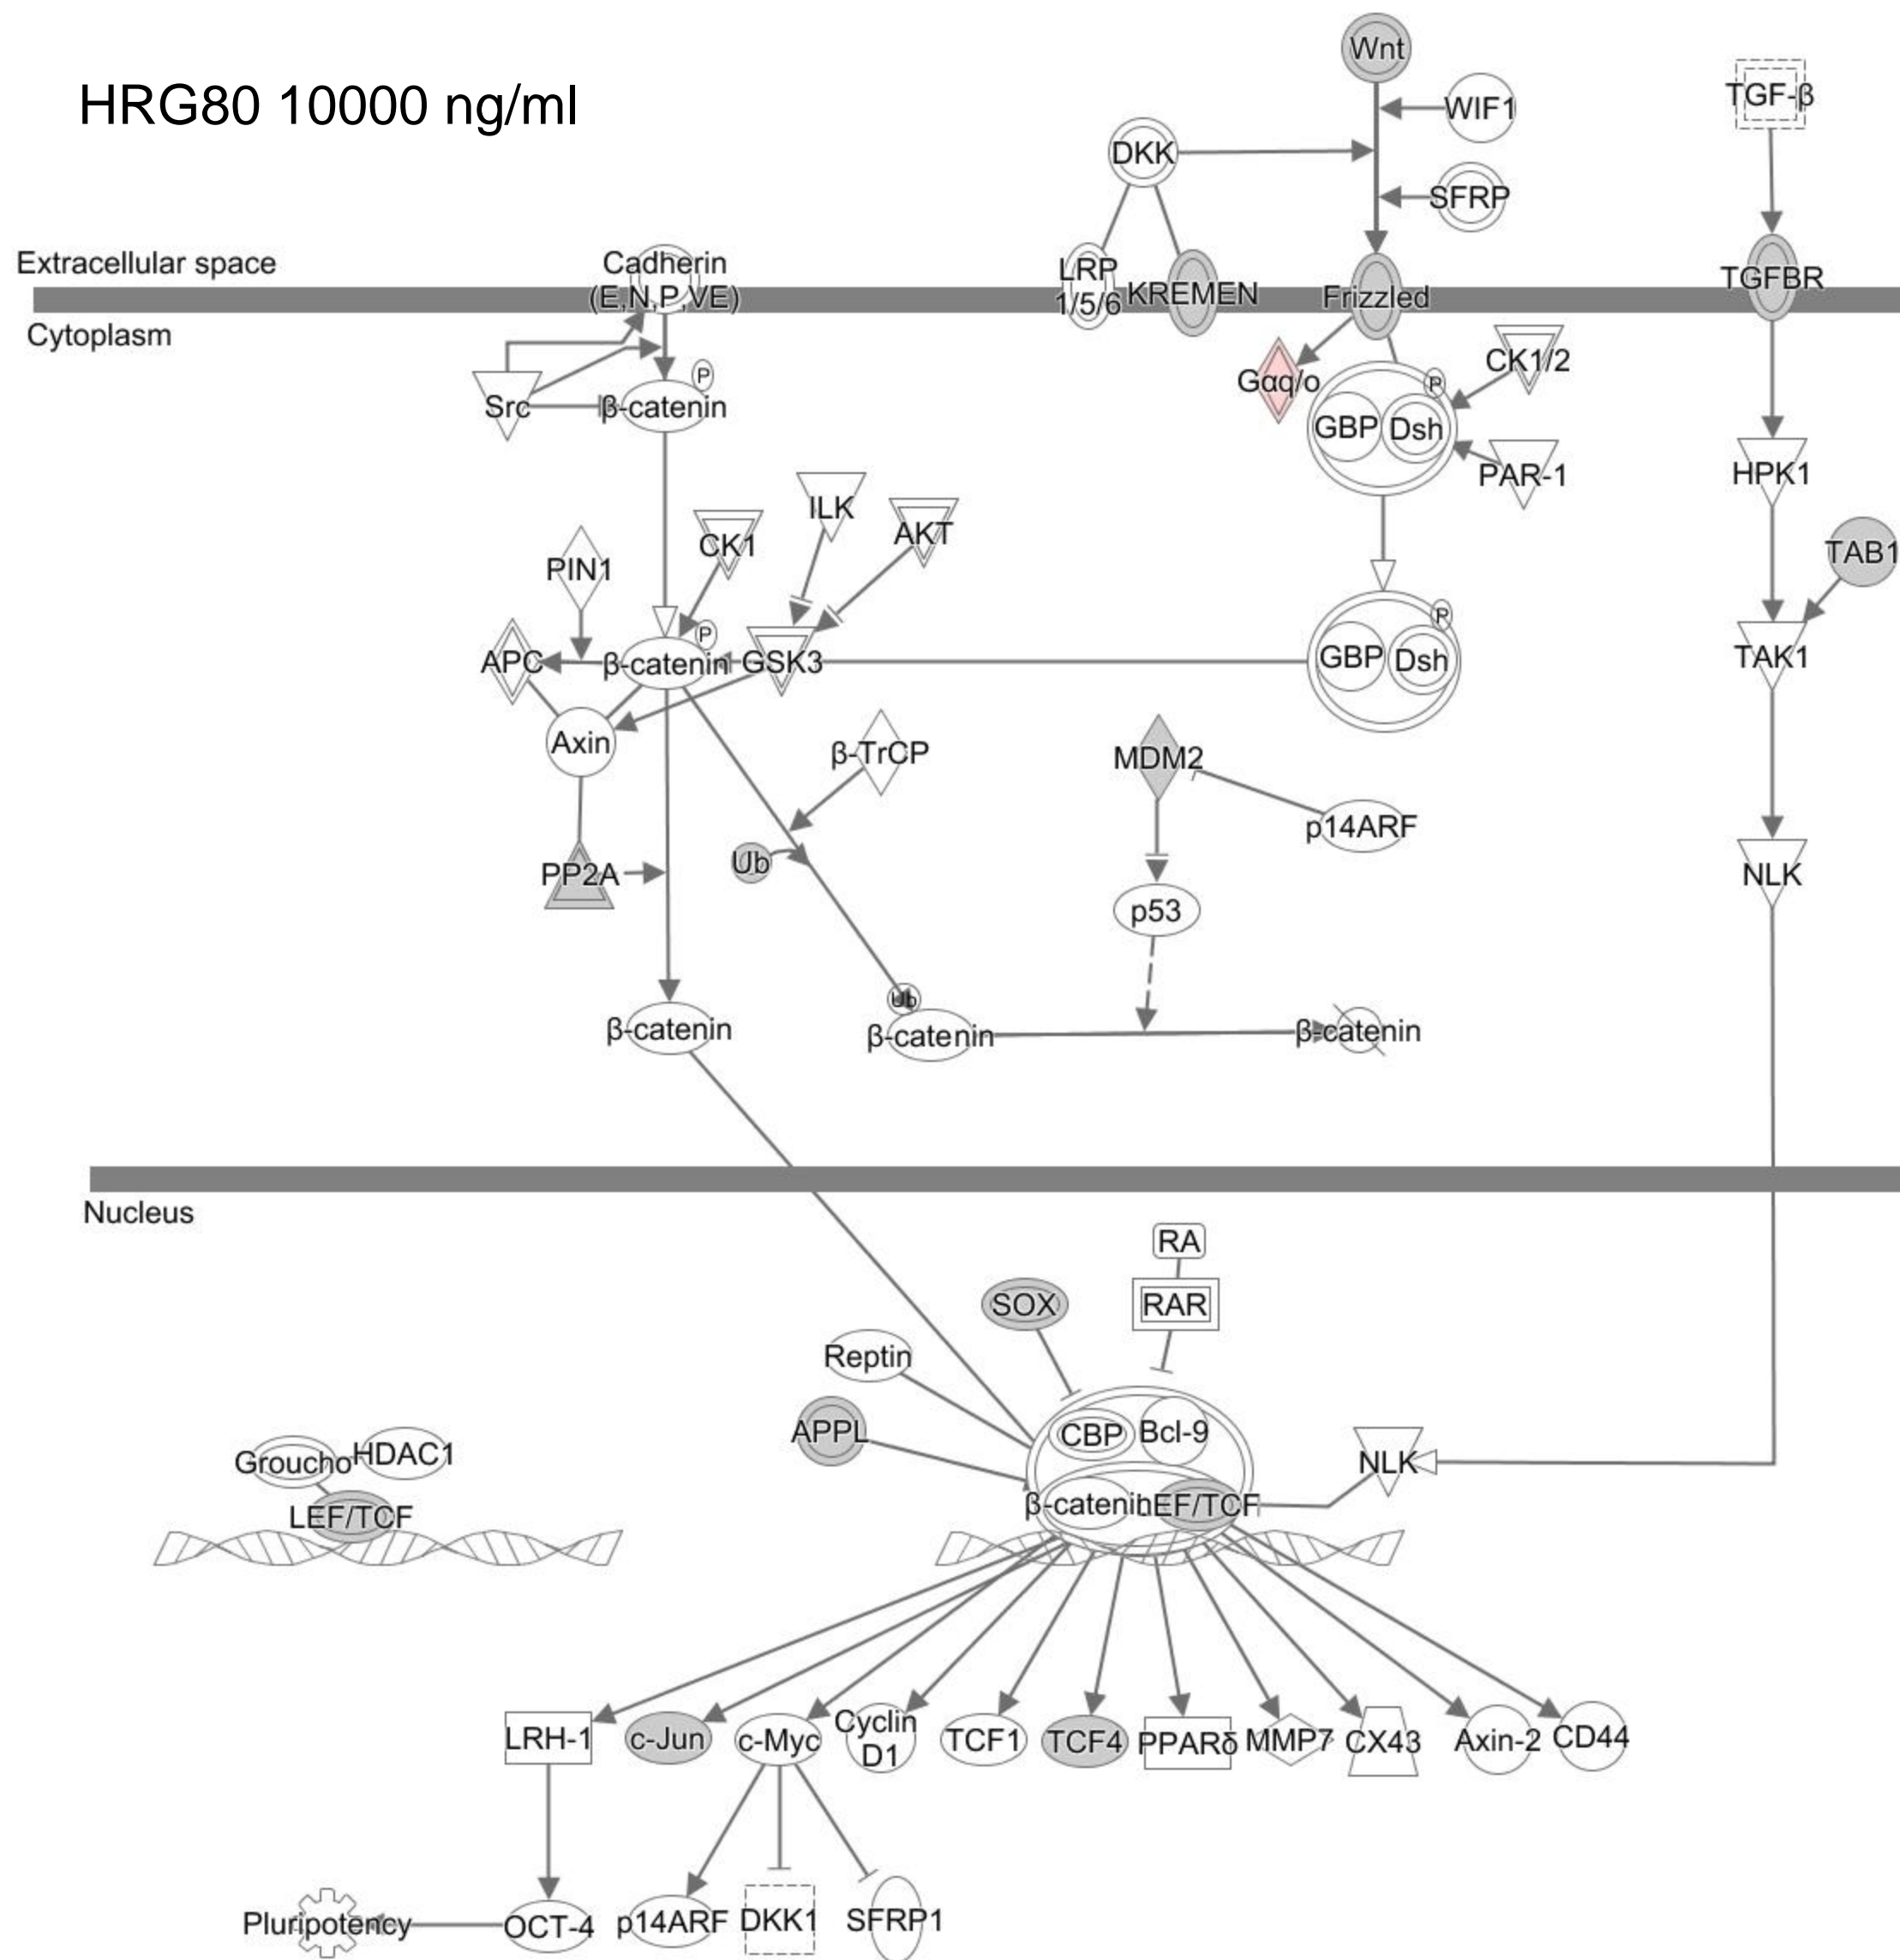



HRG80 1000 ng/ml

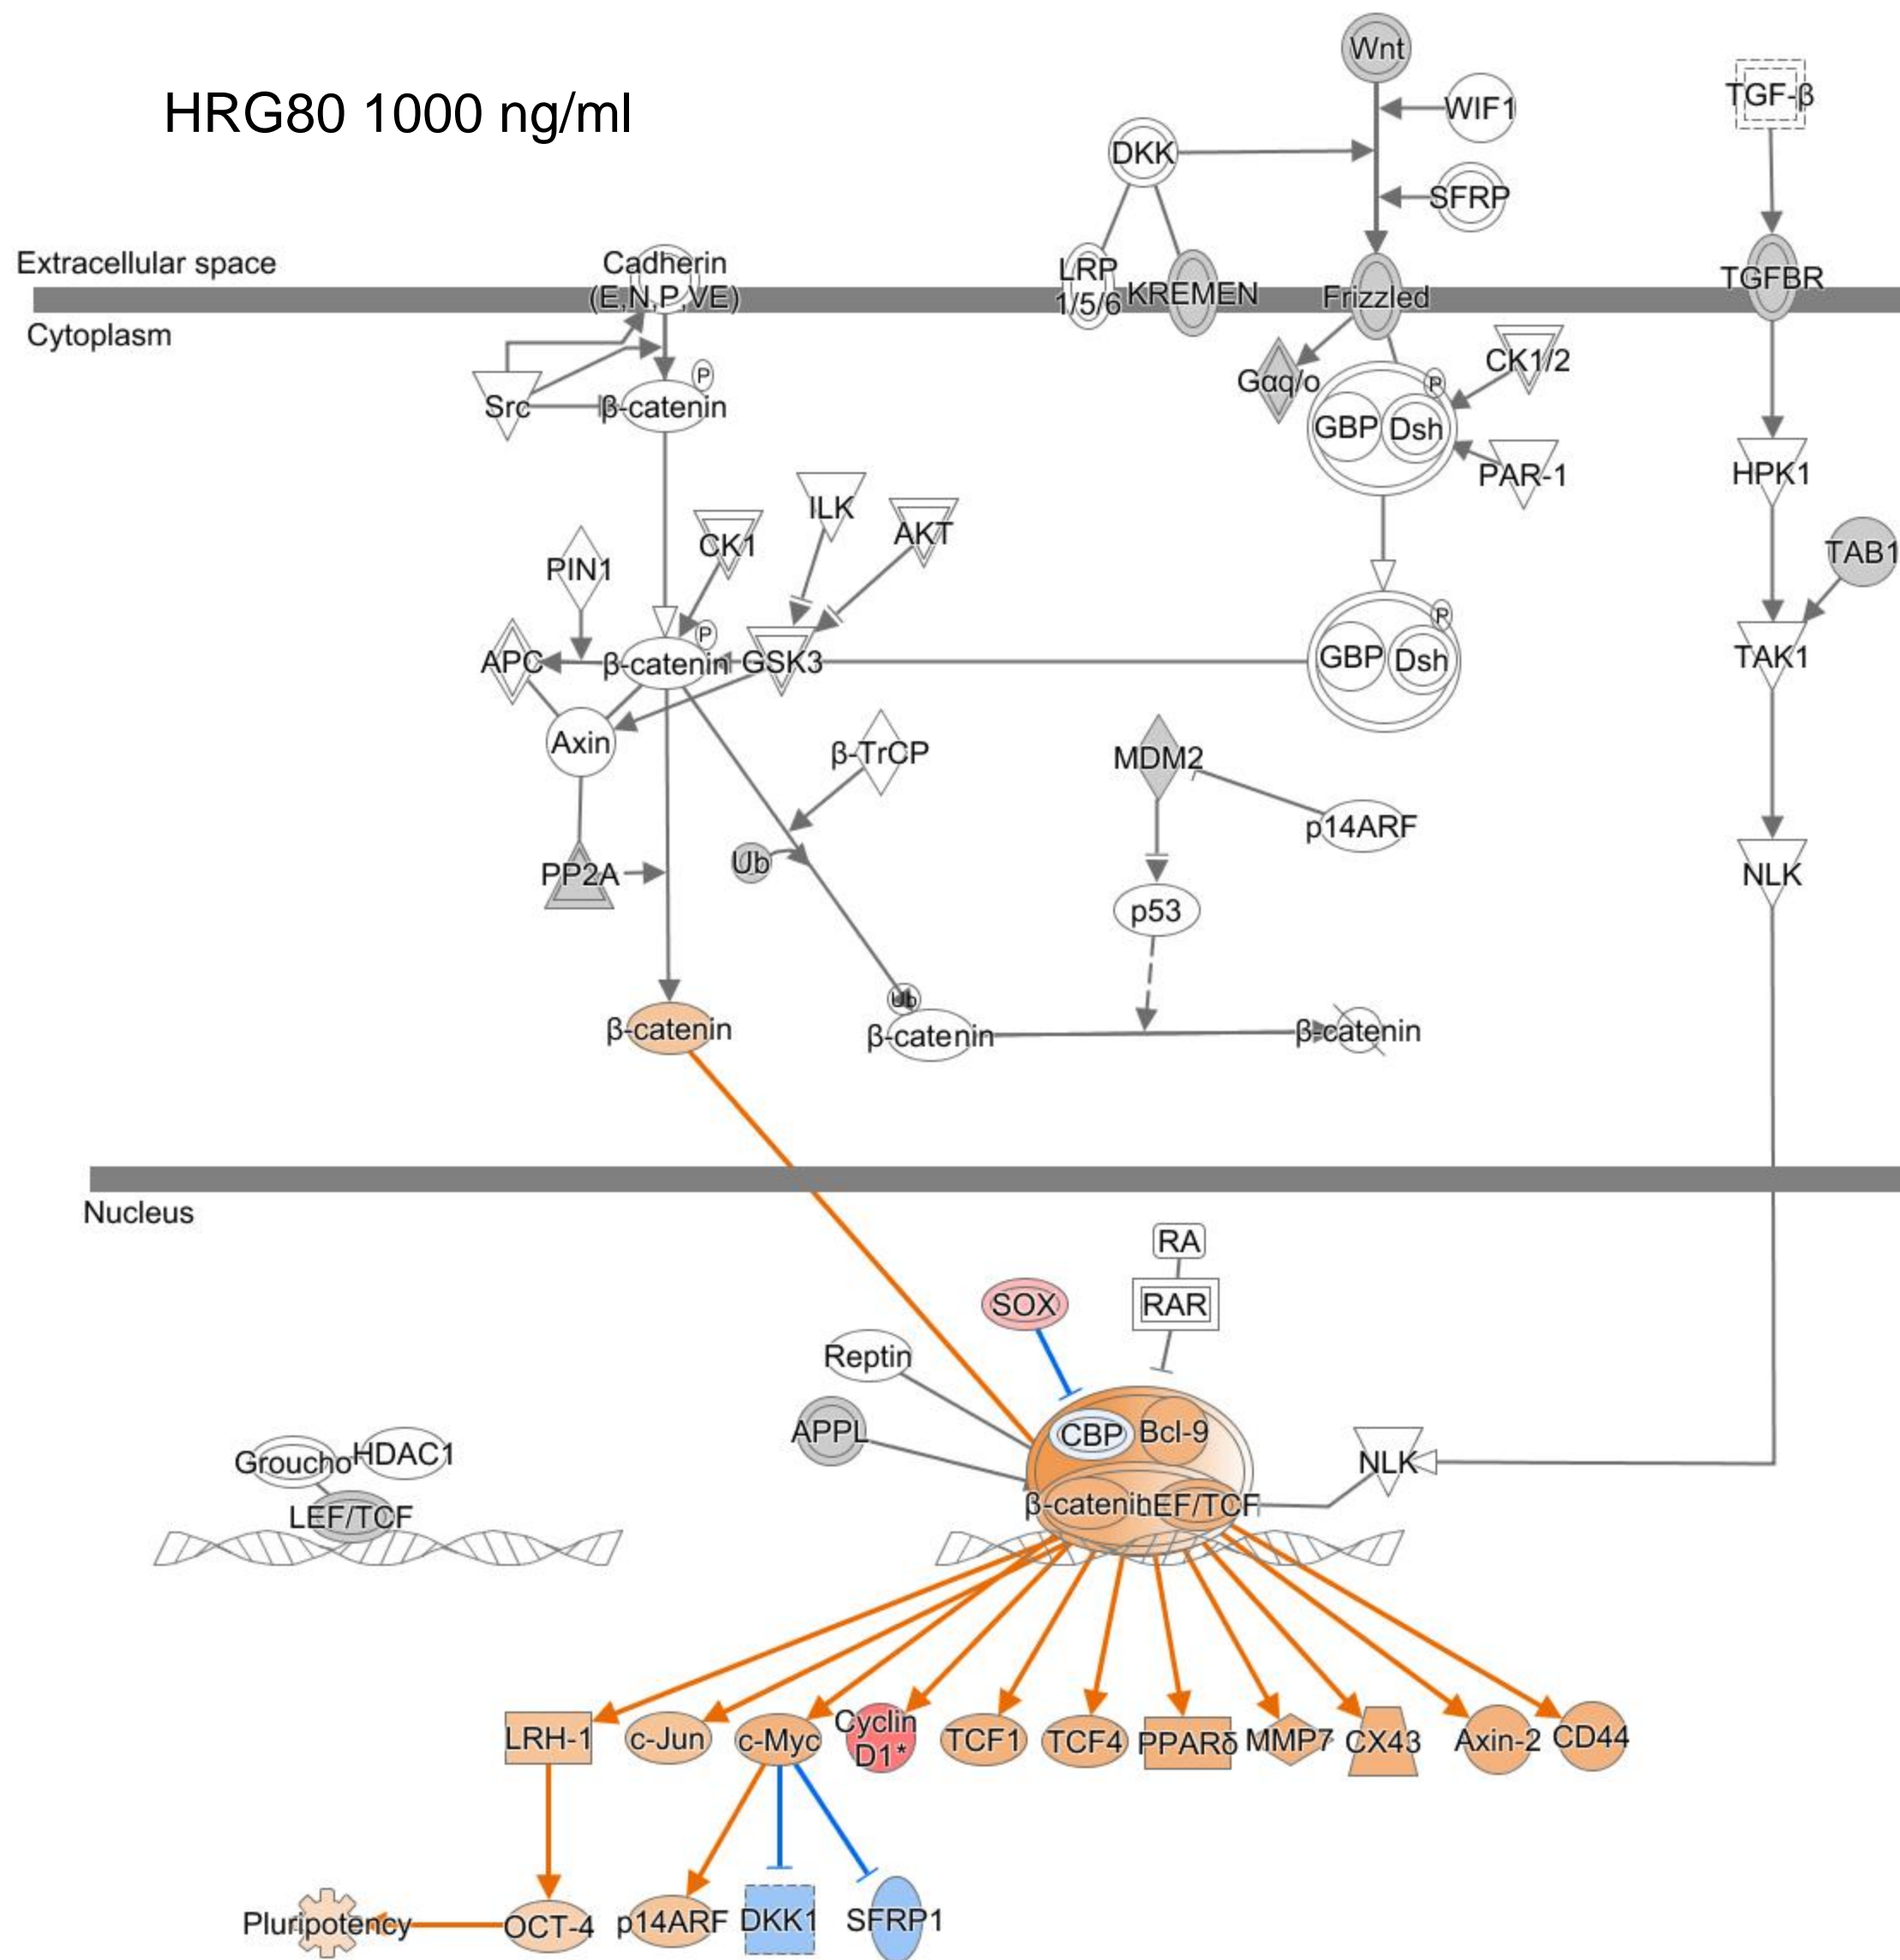

HRG80 100 ng/ml

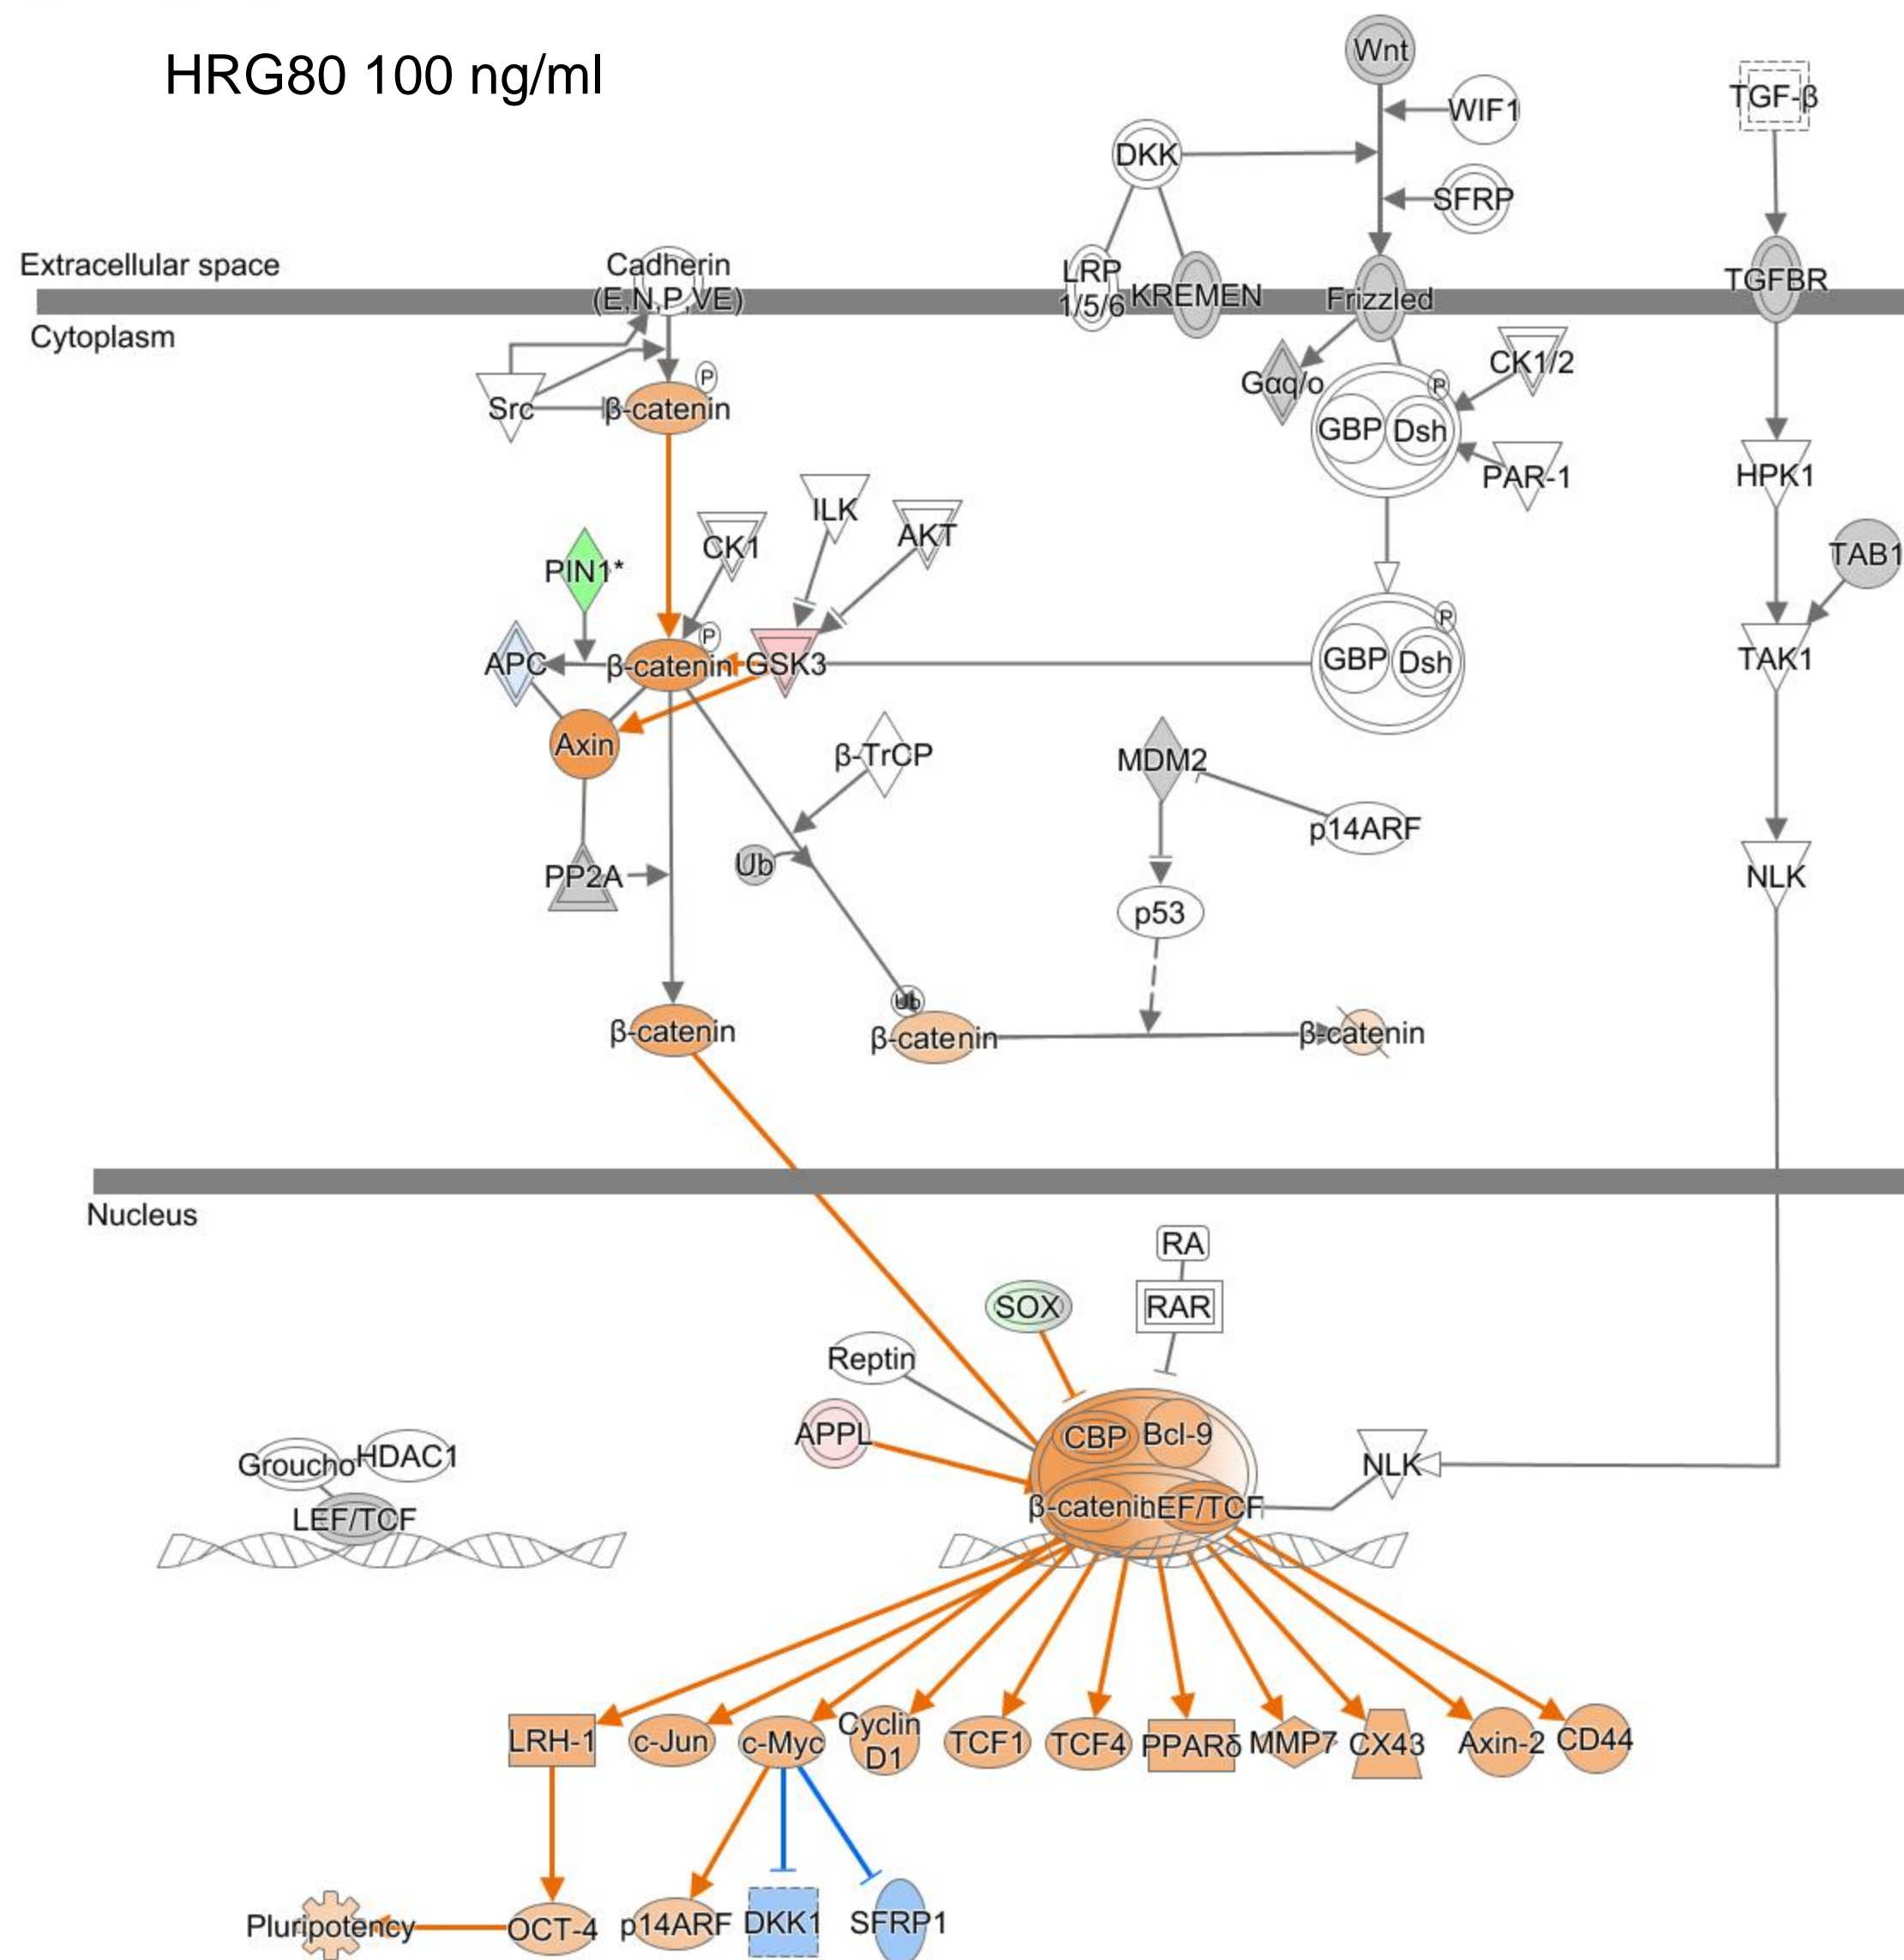



HRG80 10 ng/ml

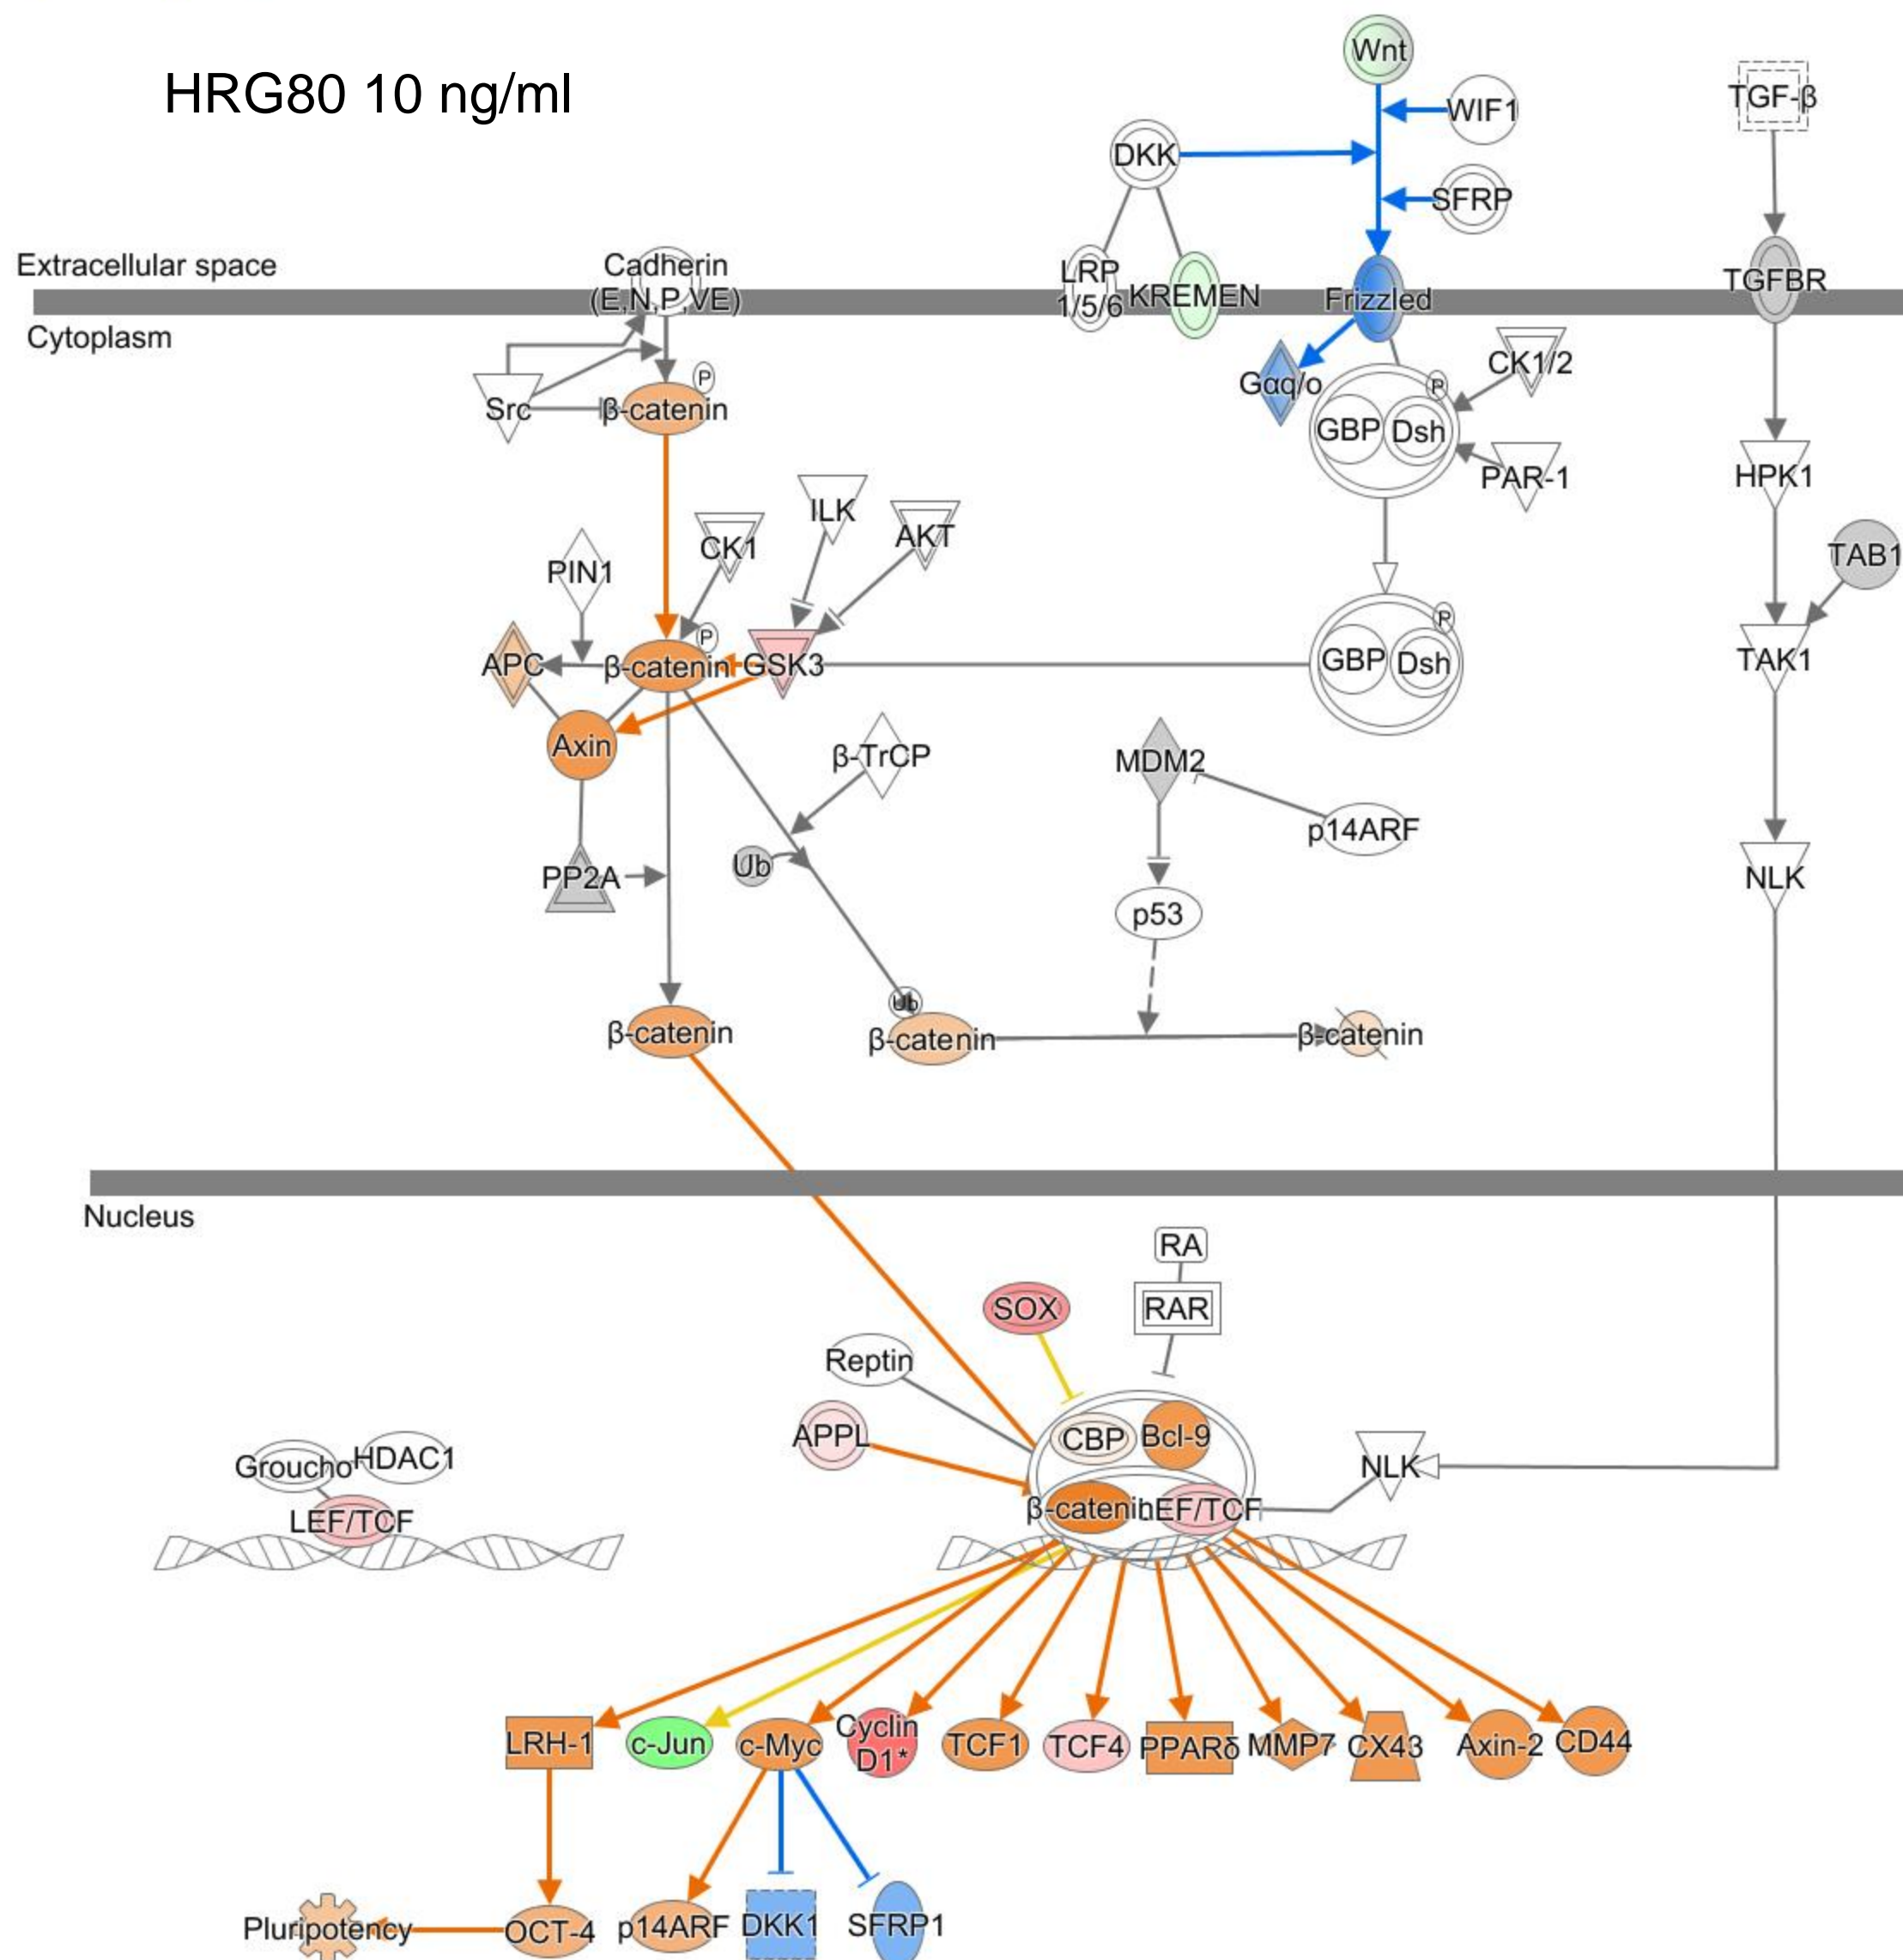

HRG80 0.01 ng/ml

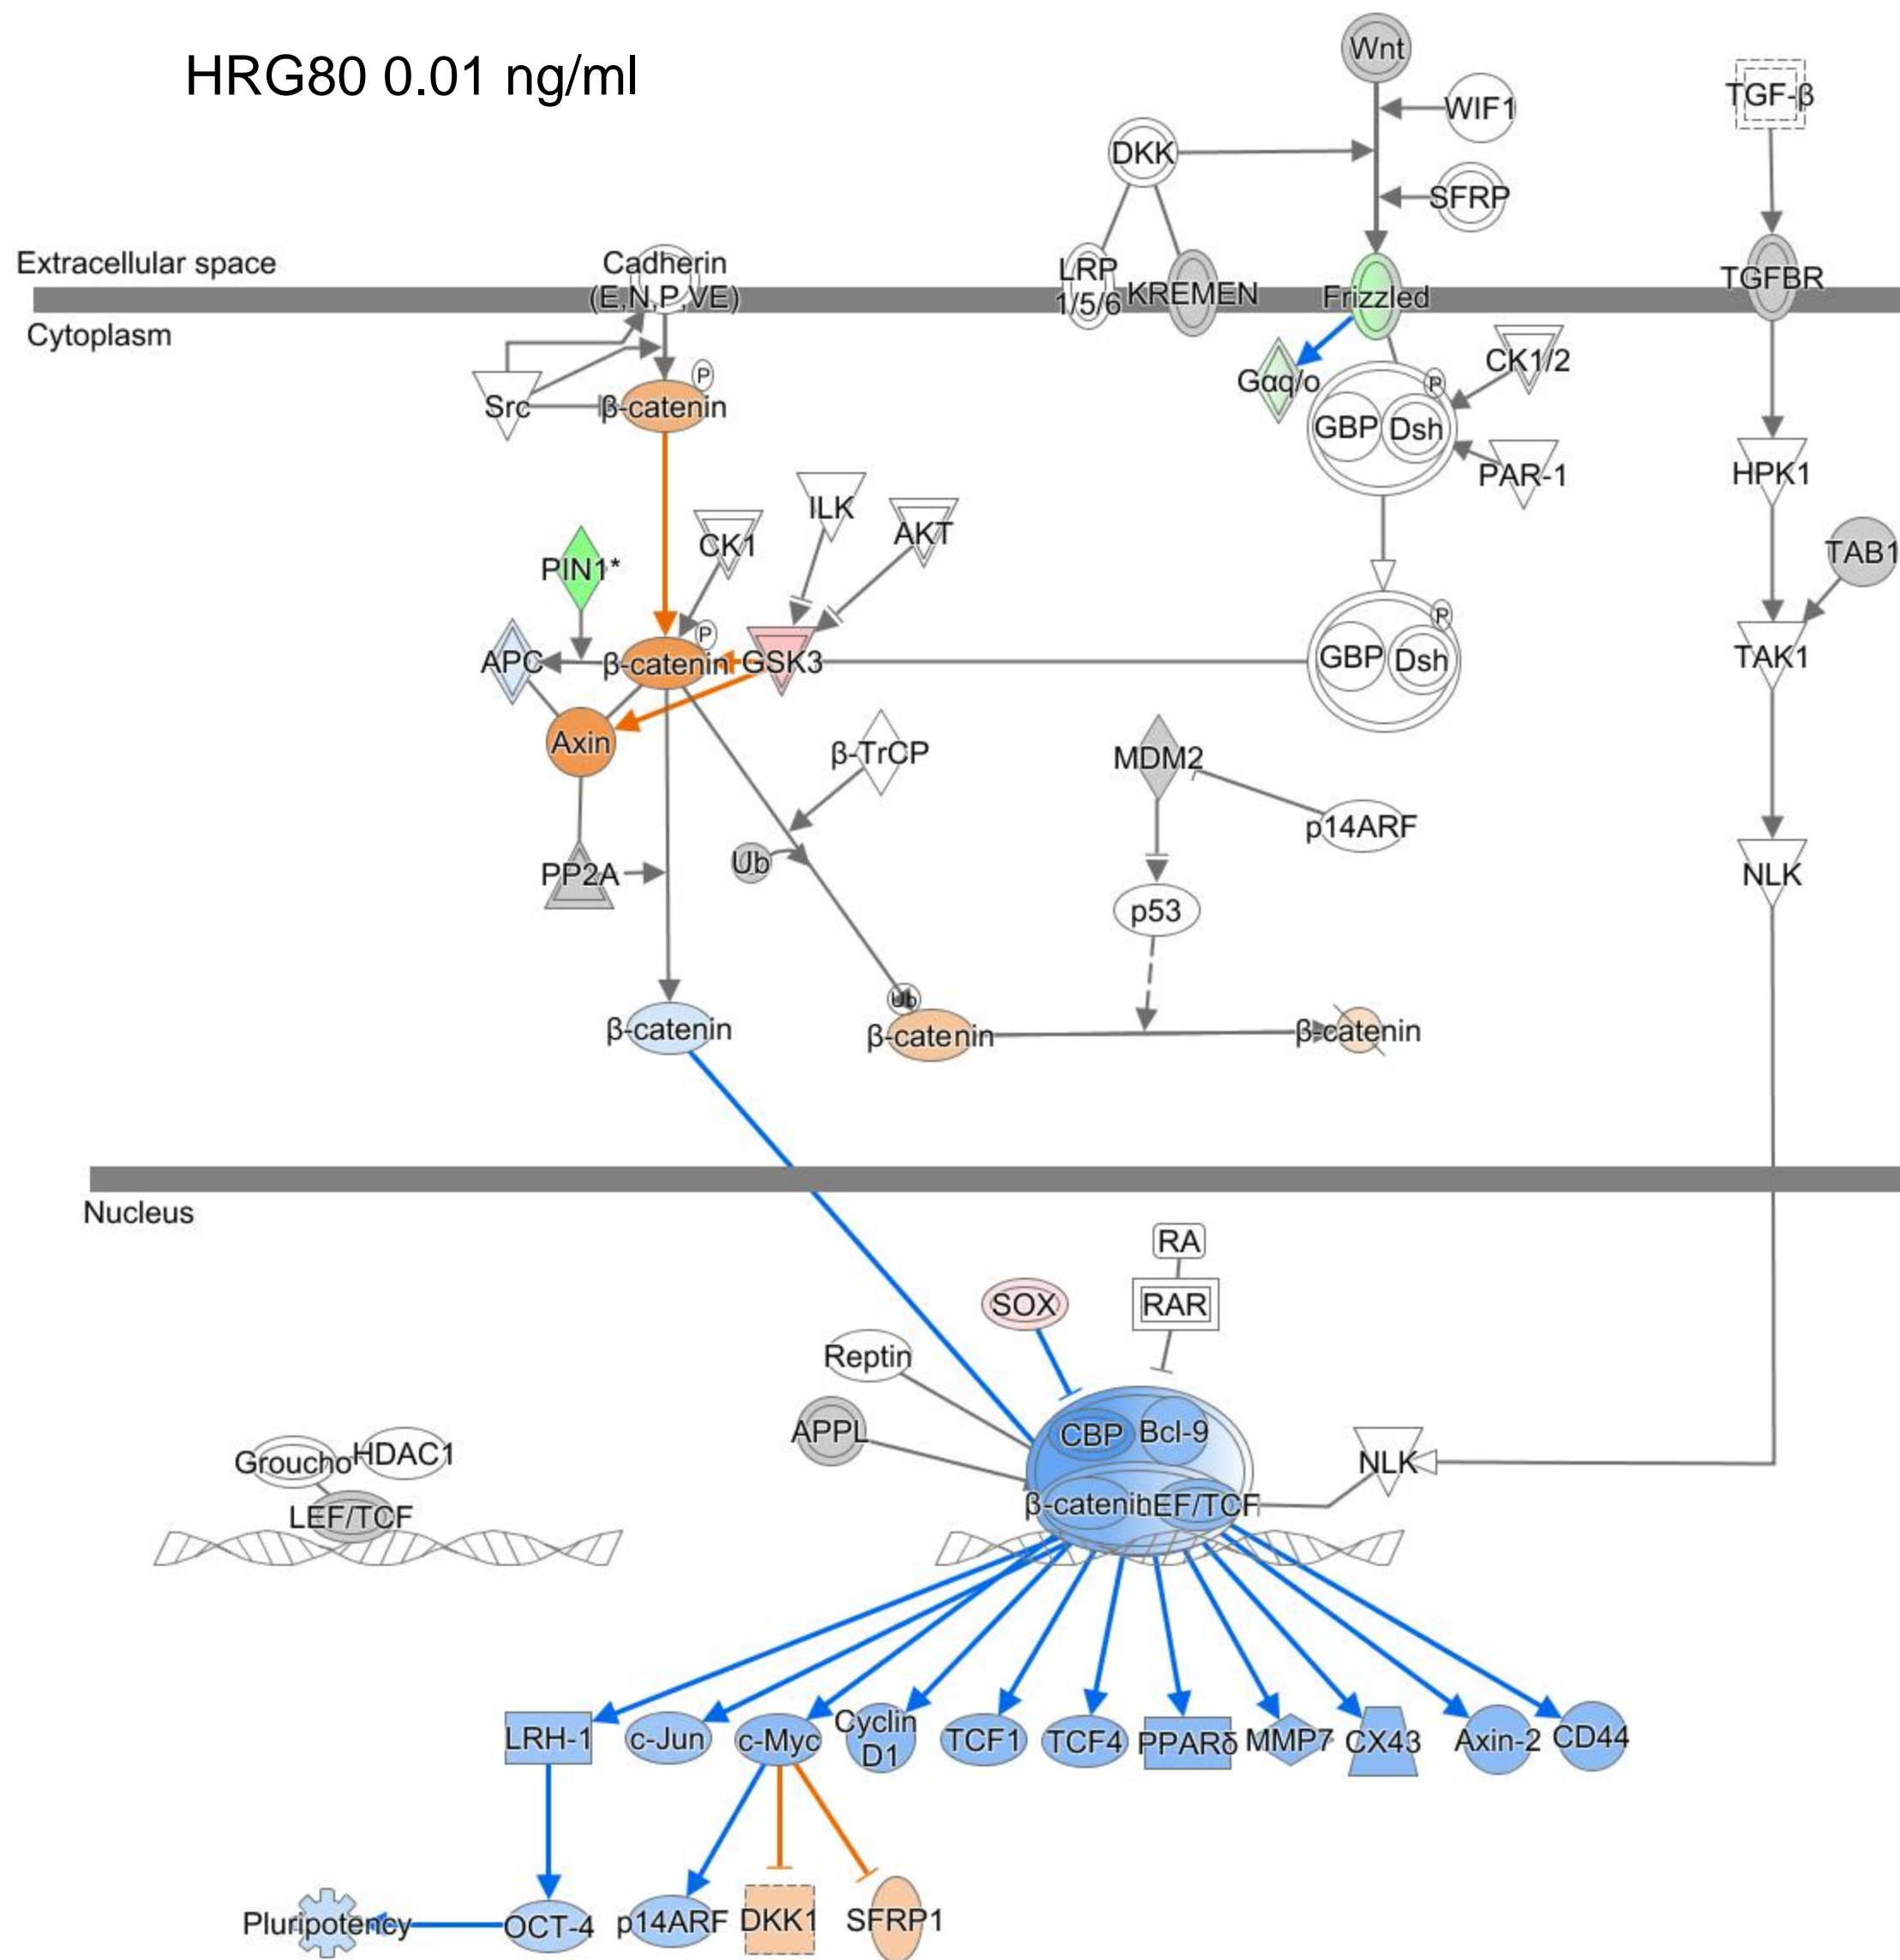



Rb1 100 nM

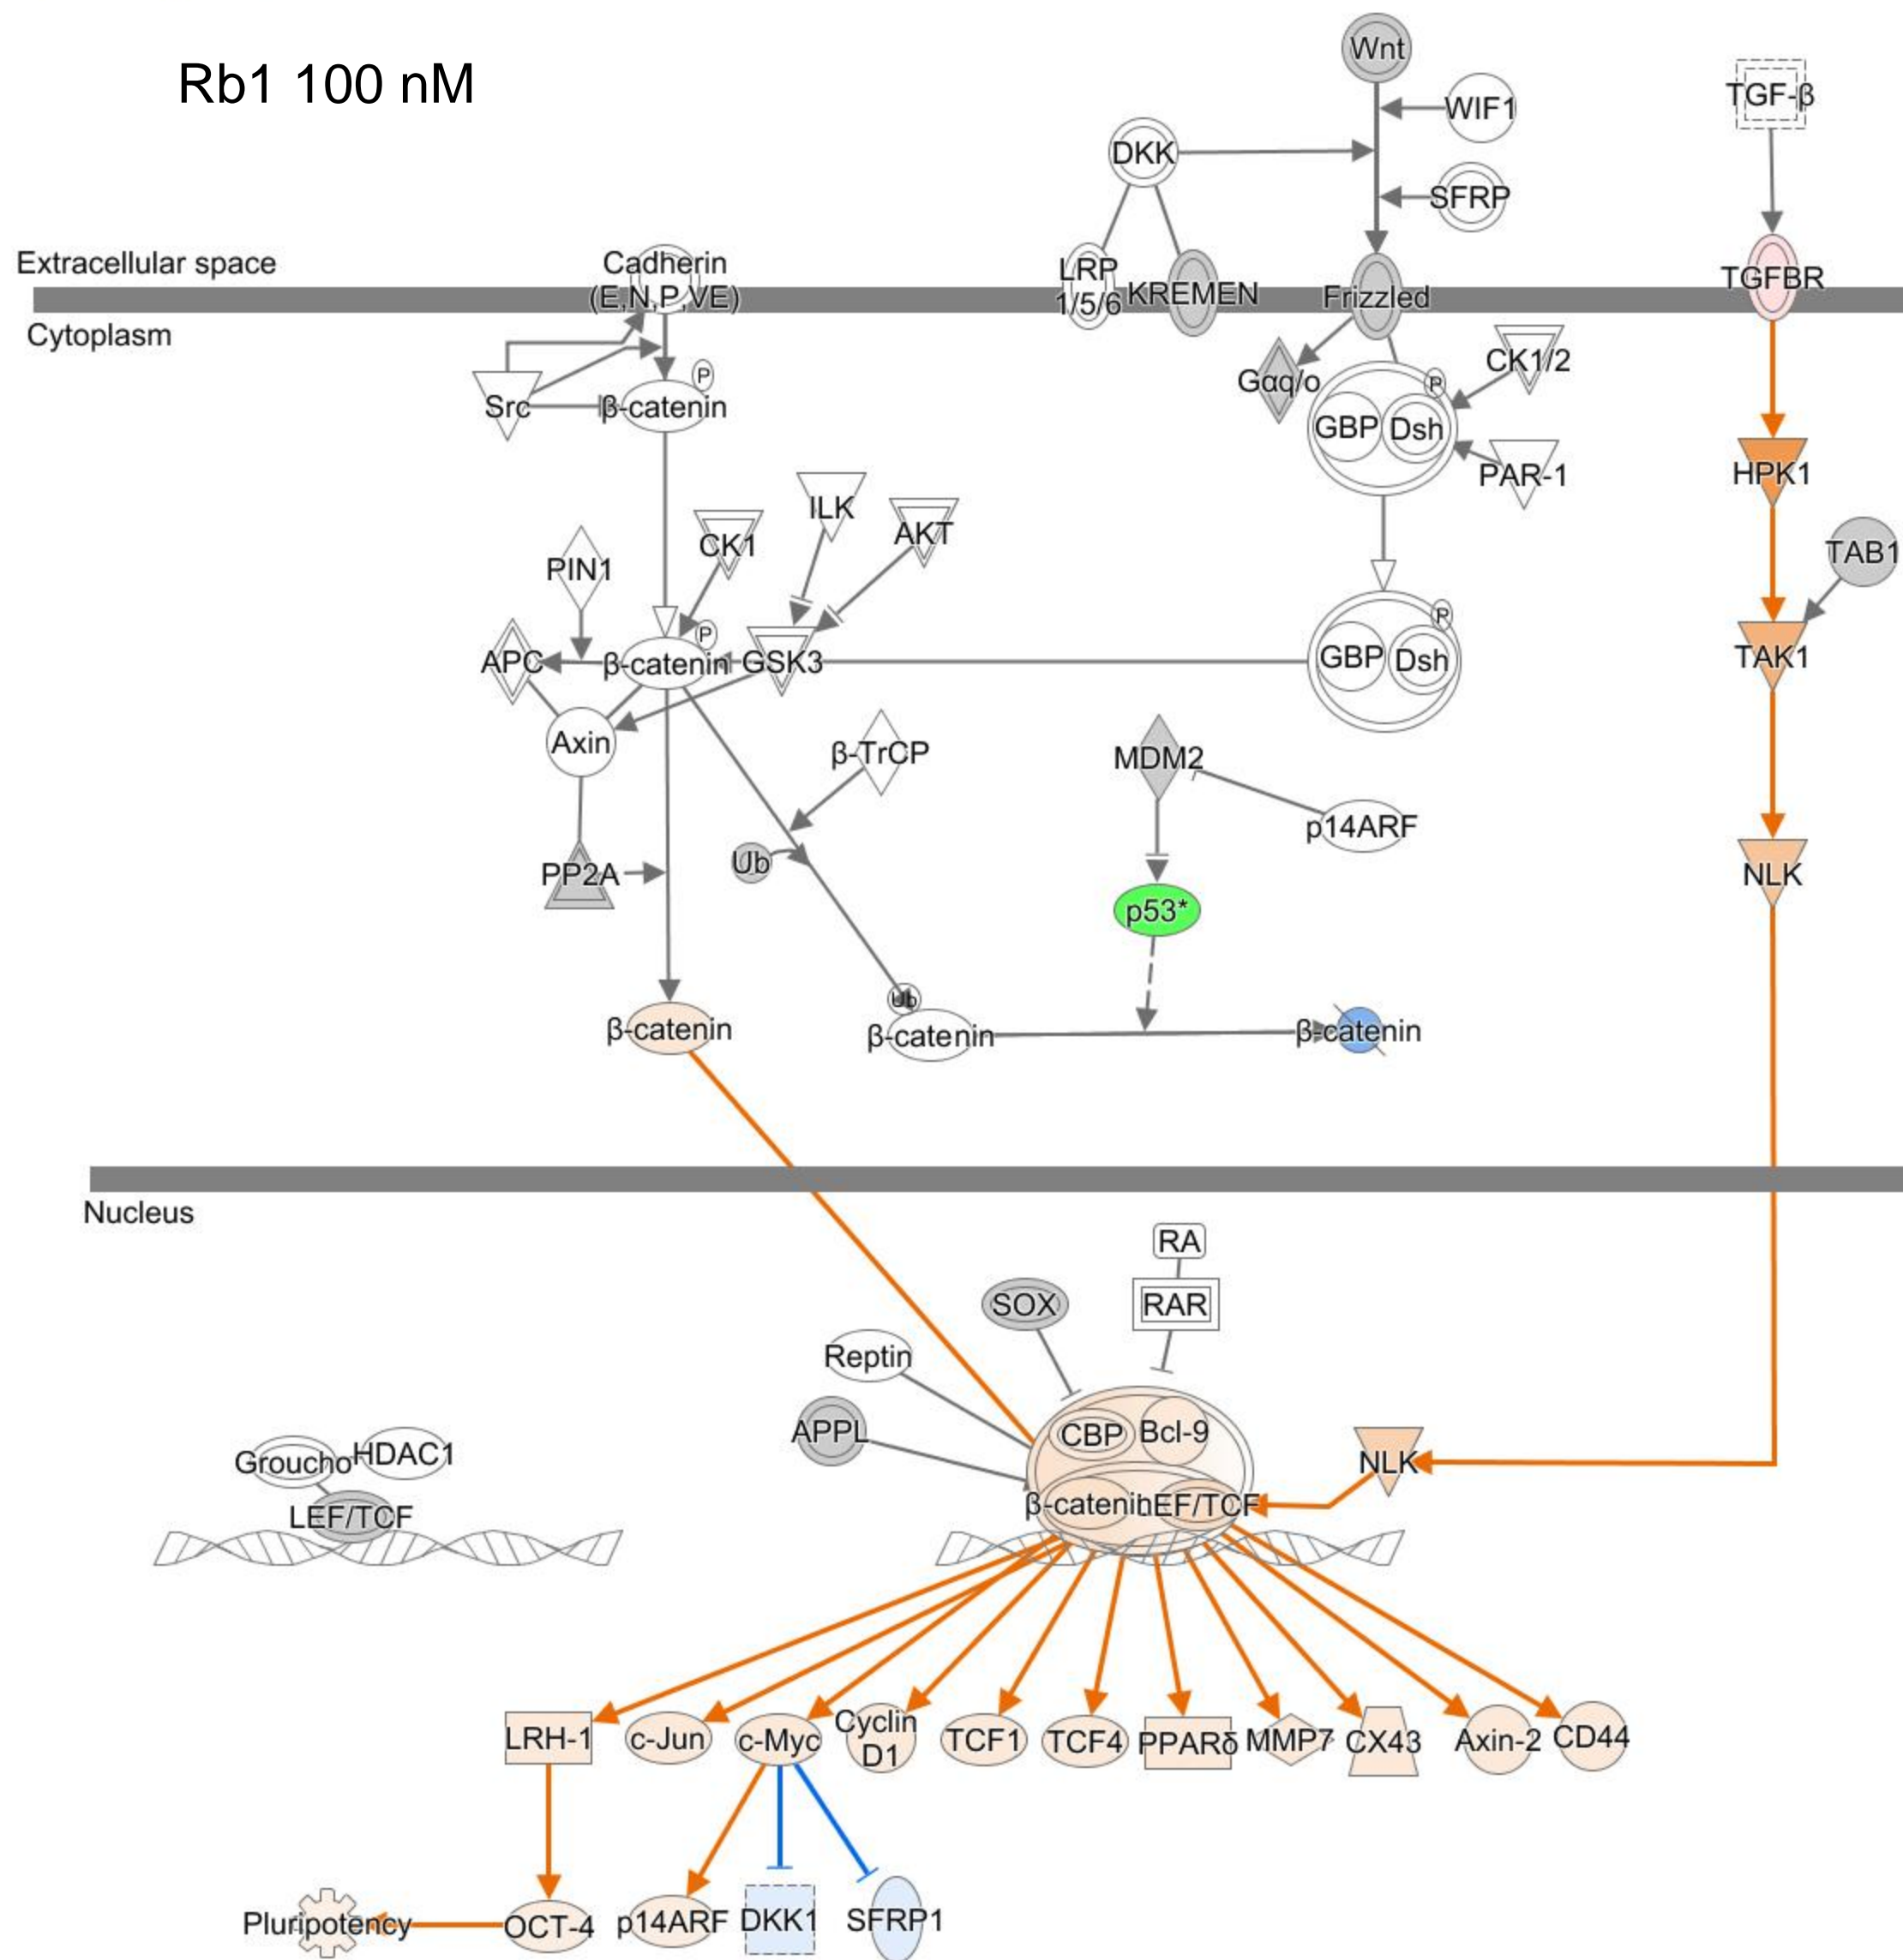

Rg3 100 nM

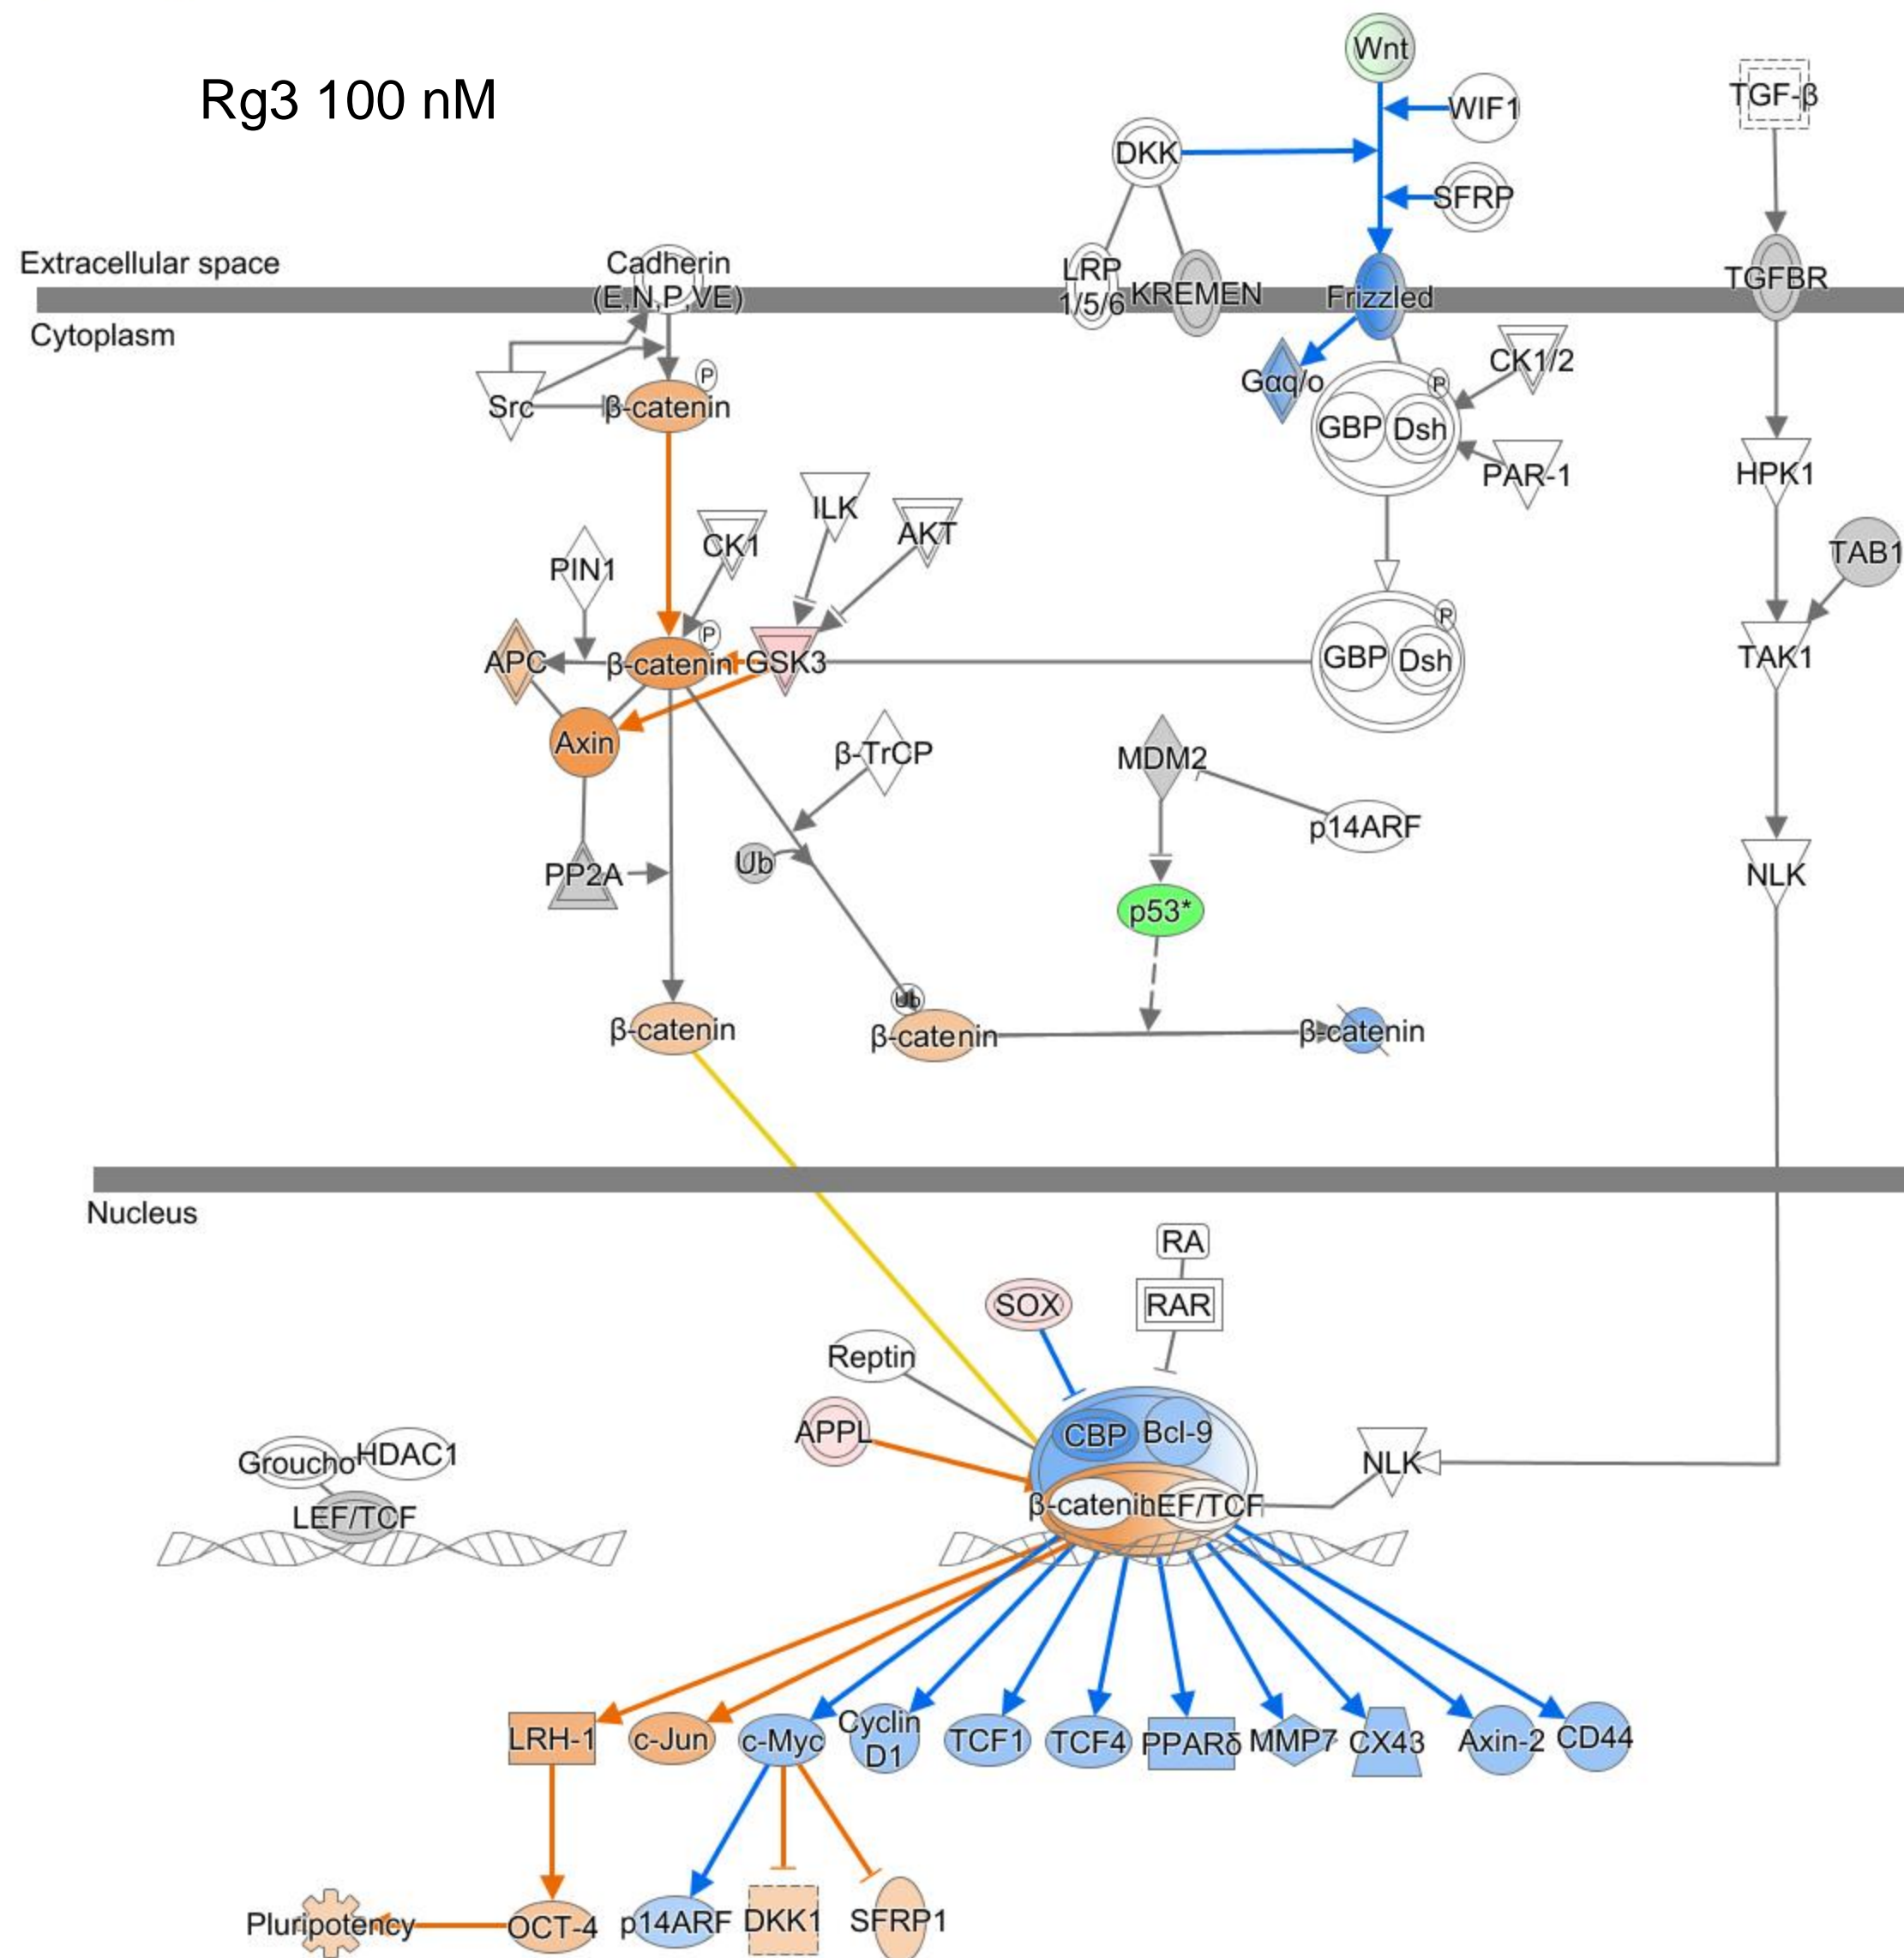



Rg5 100 nM

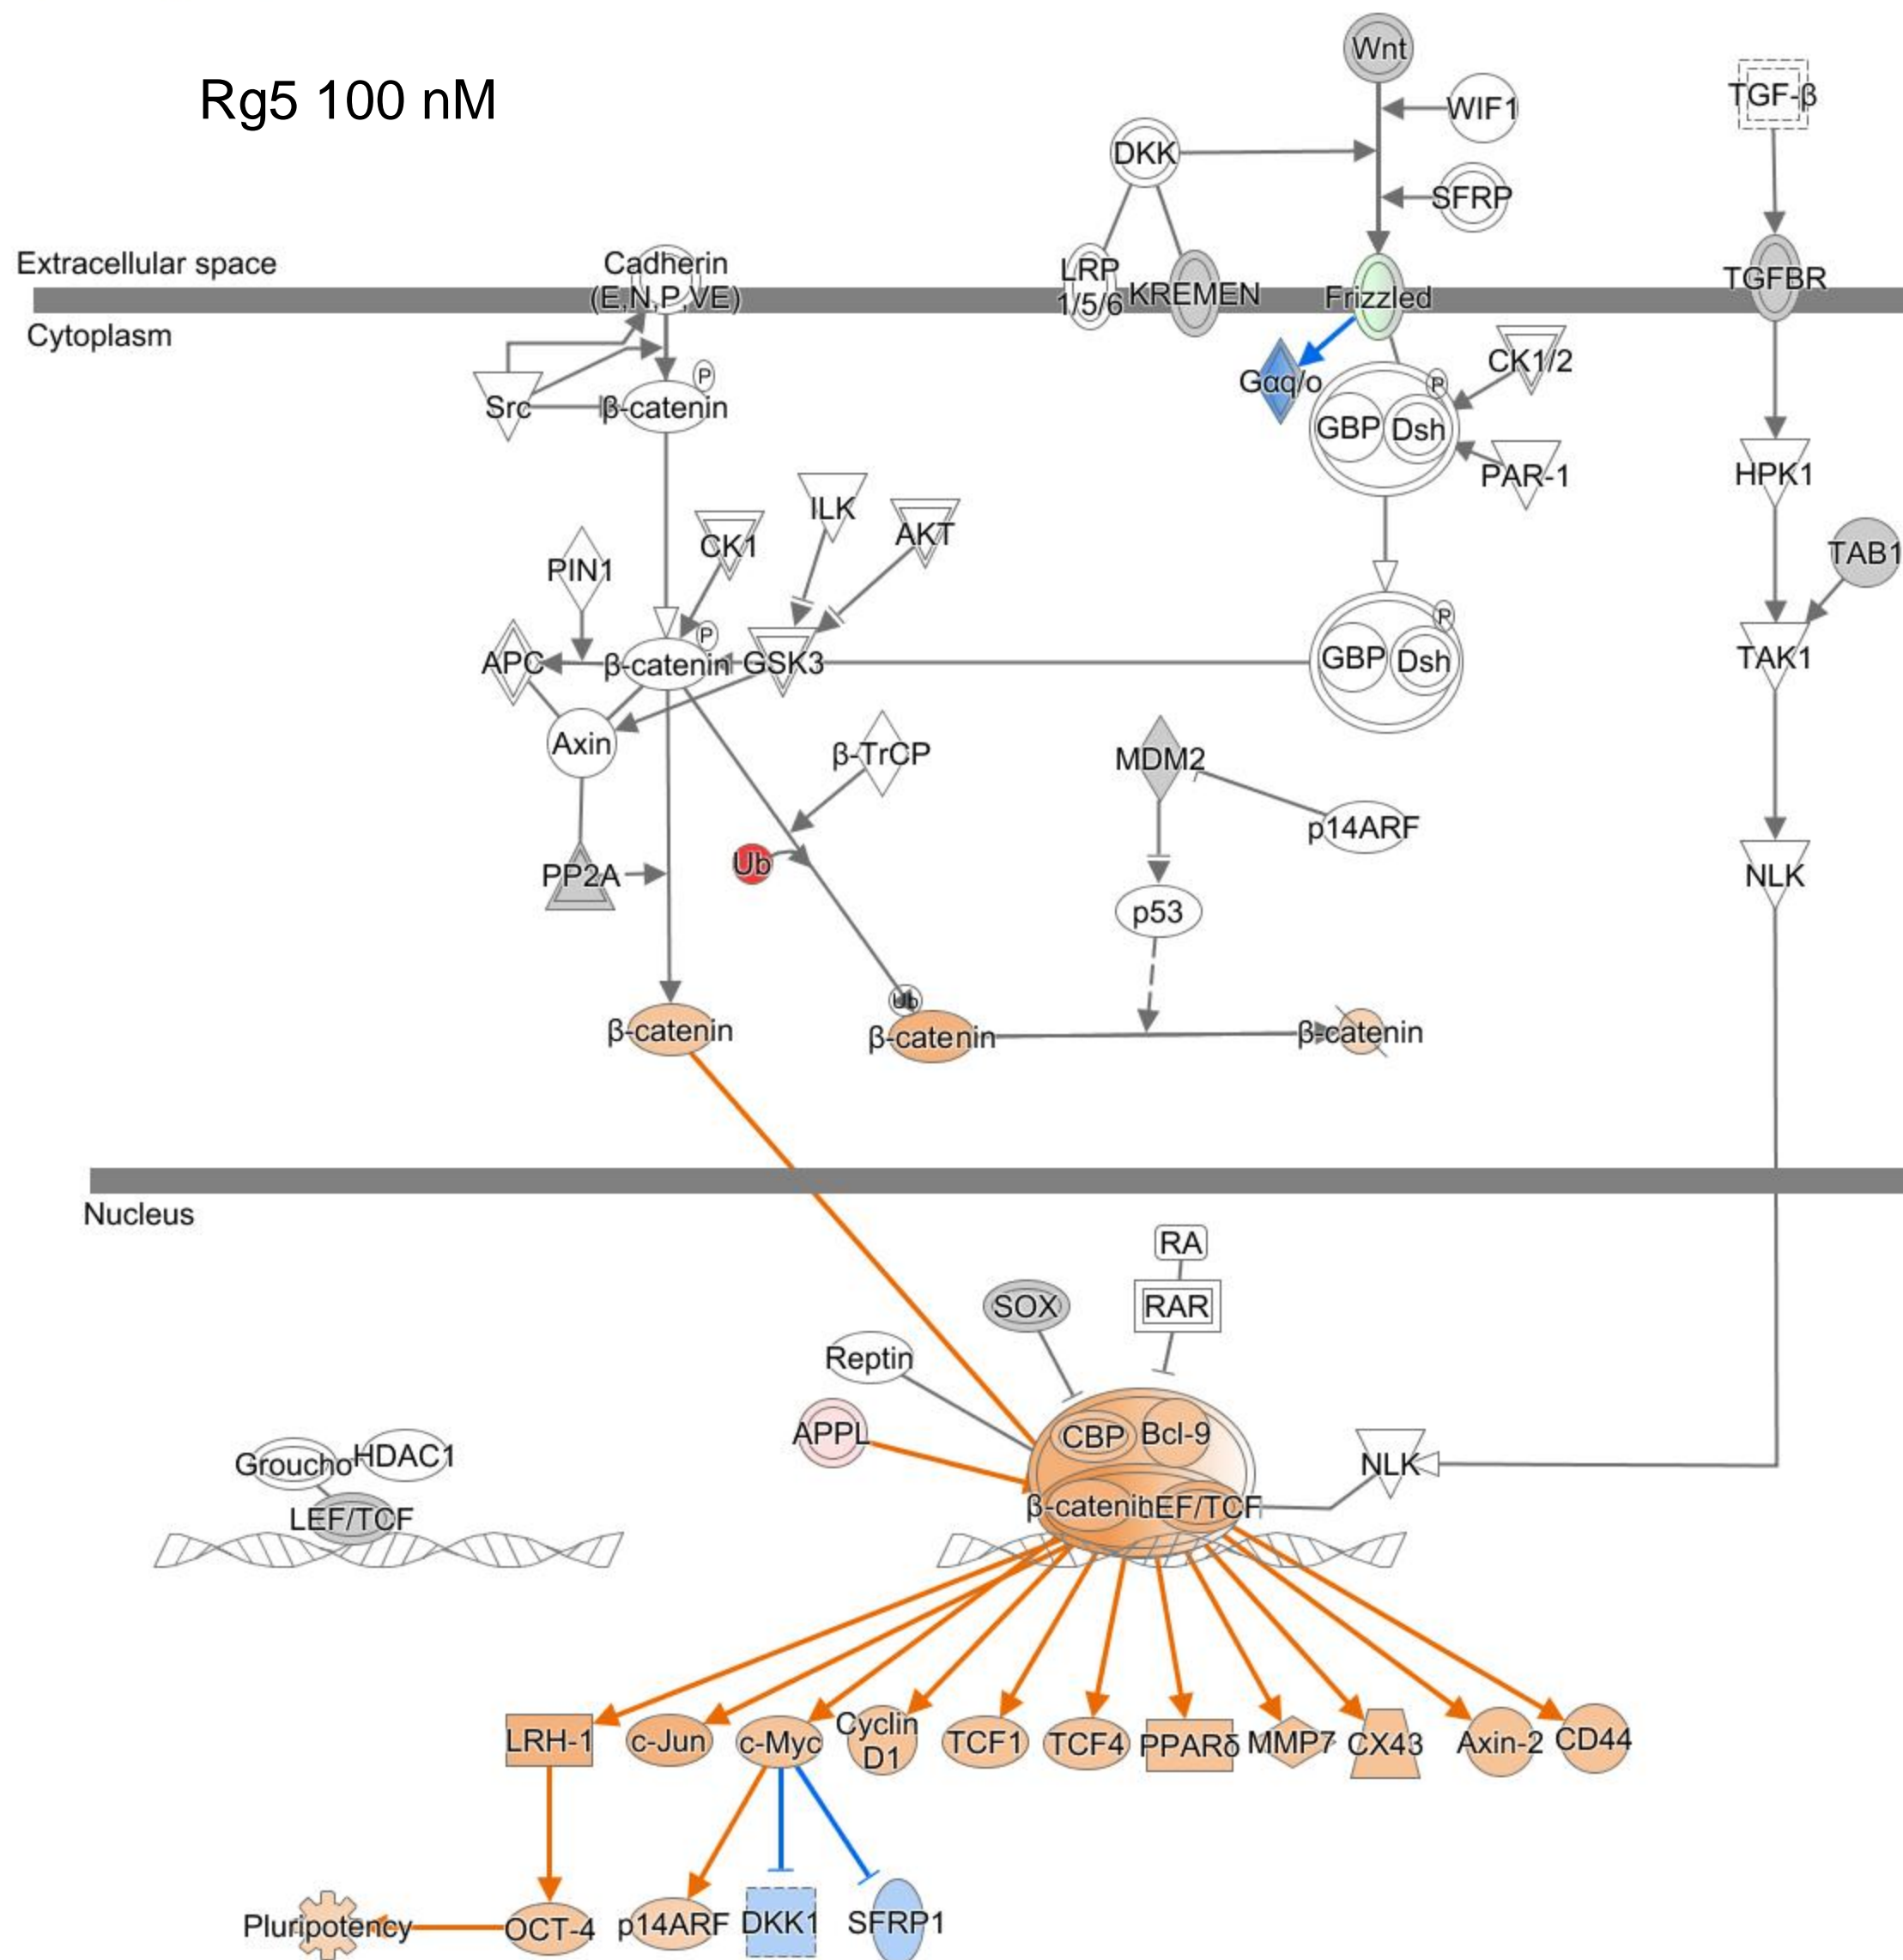

Rk1 100 nM

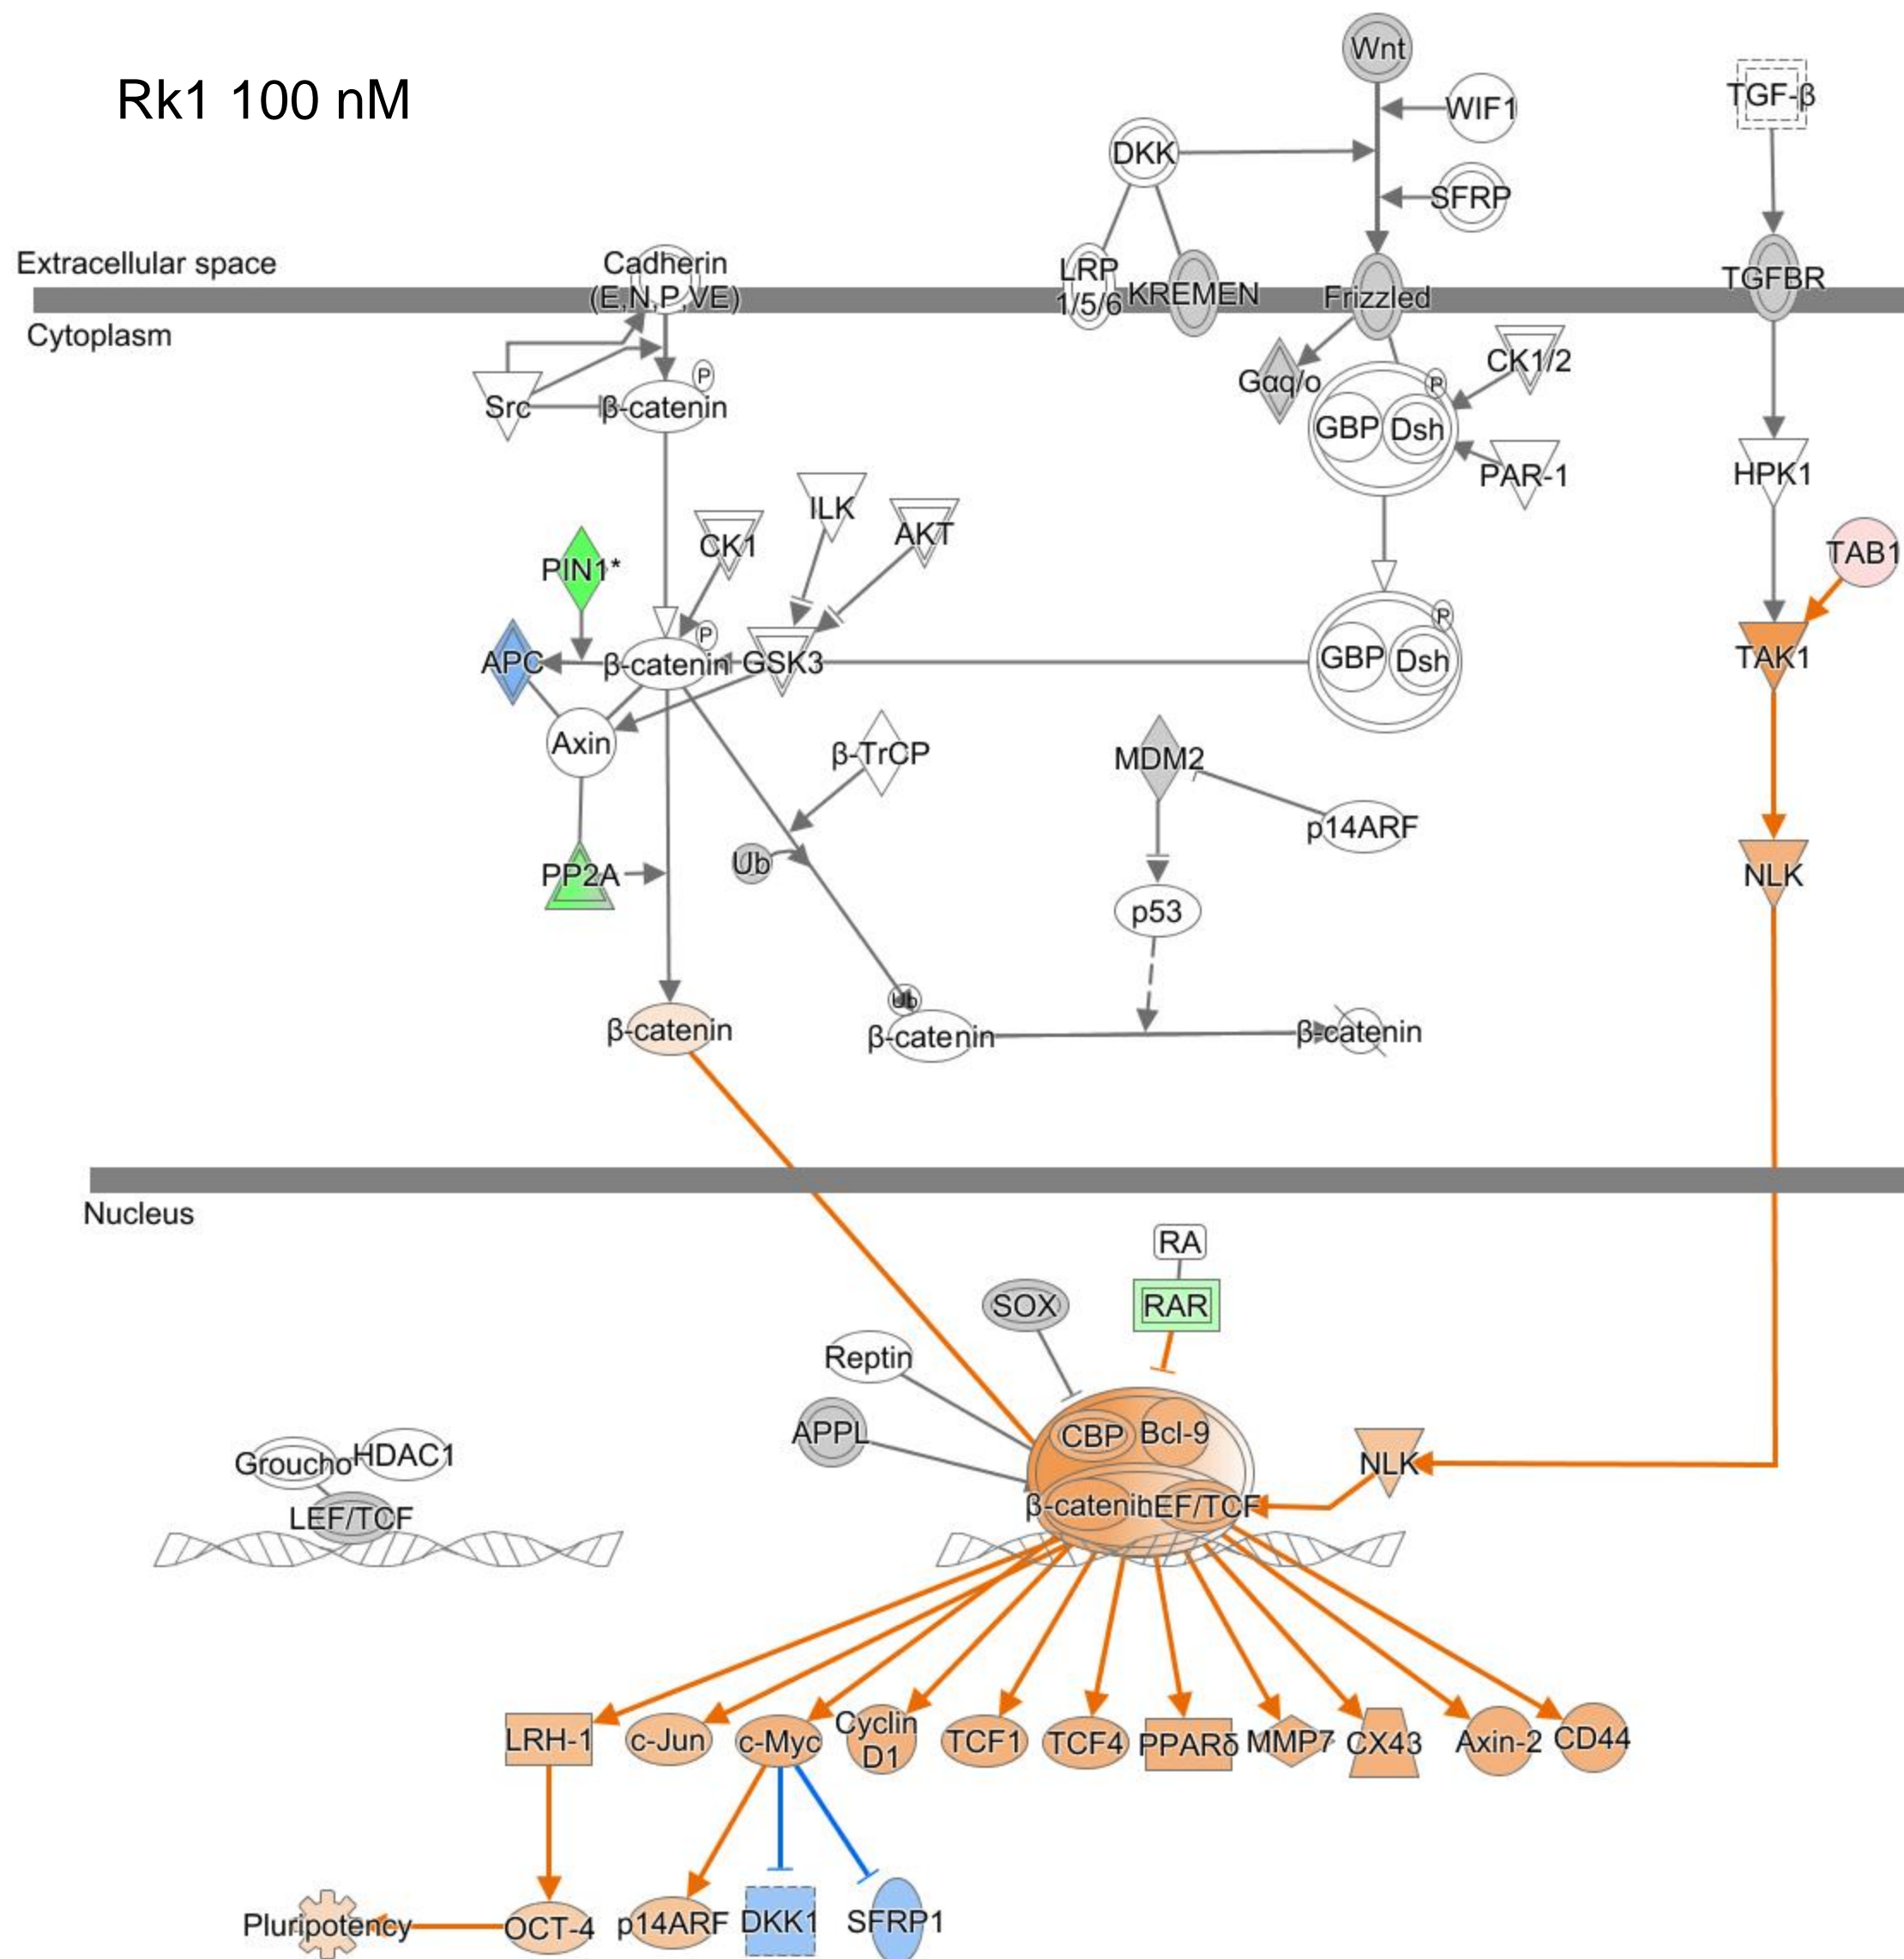

Supplement: Supplementary file 4 [file supplementary]

WG 10000 ng/ml

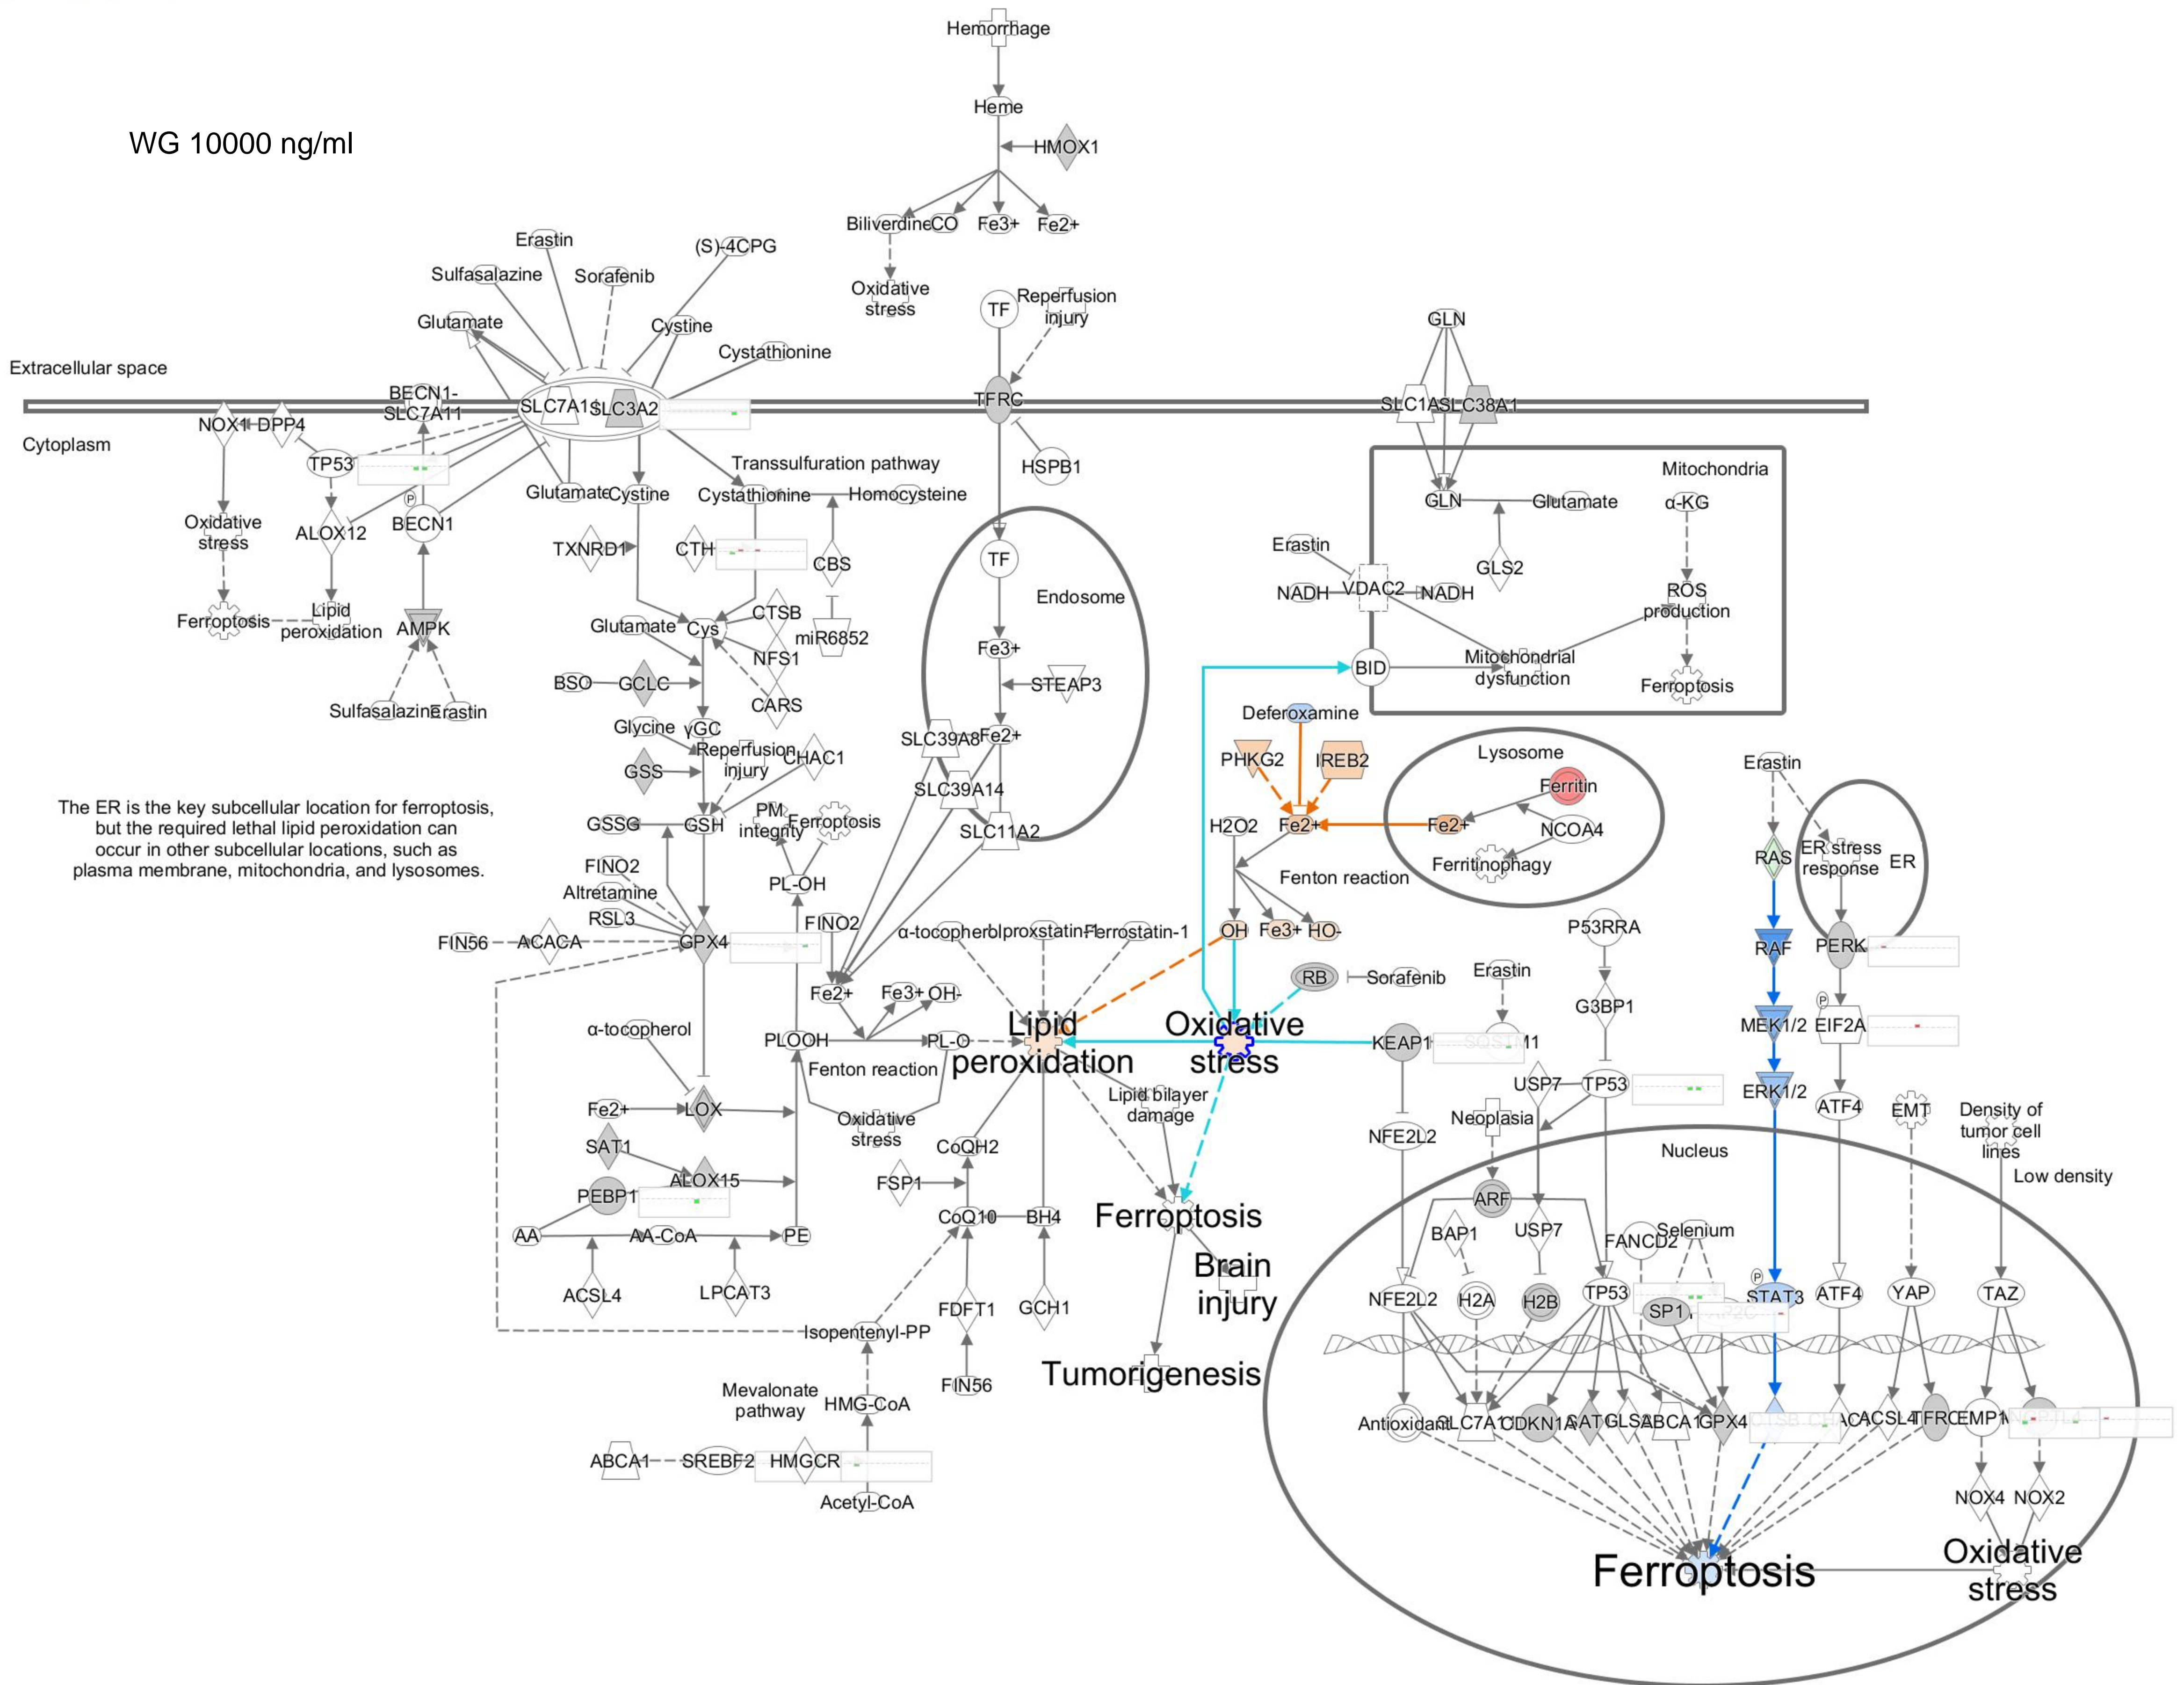



HRG80 10000 ng/ml

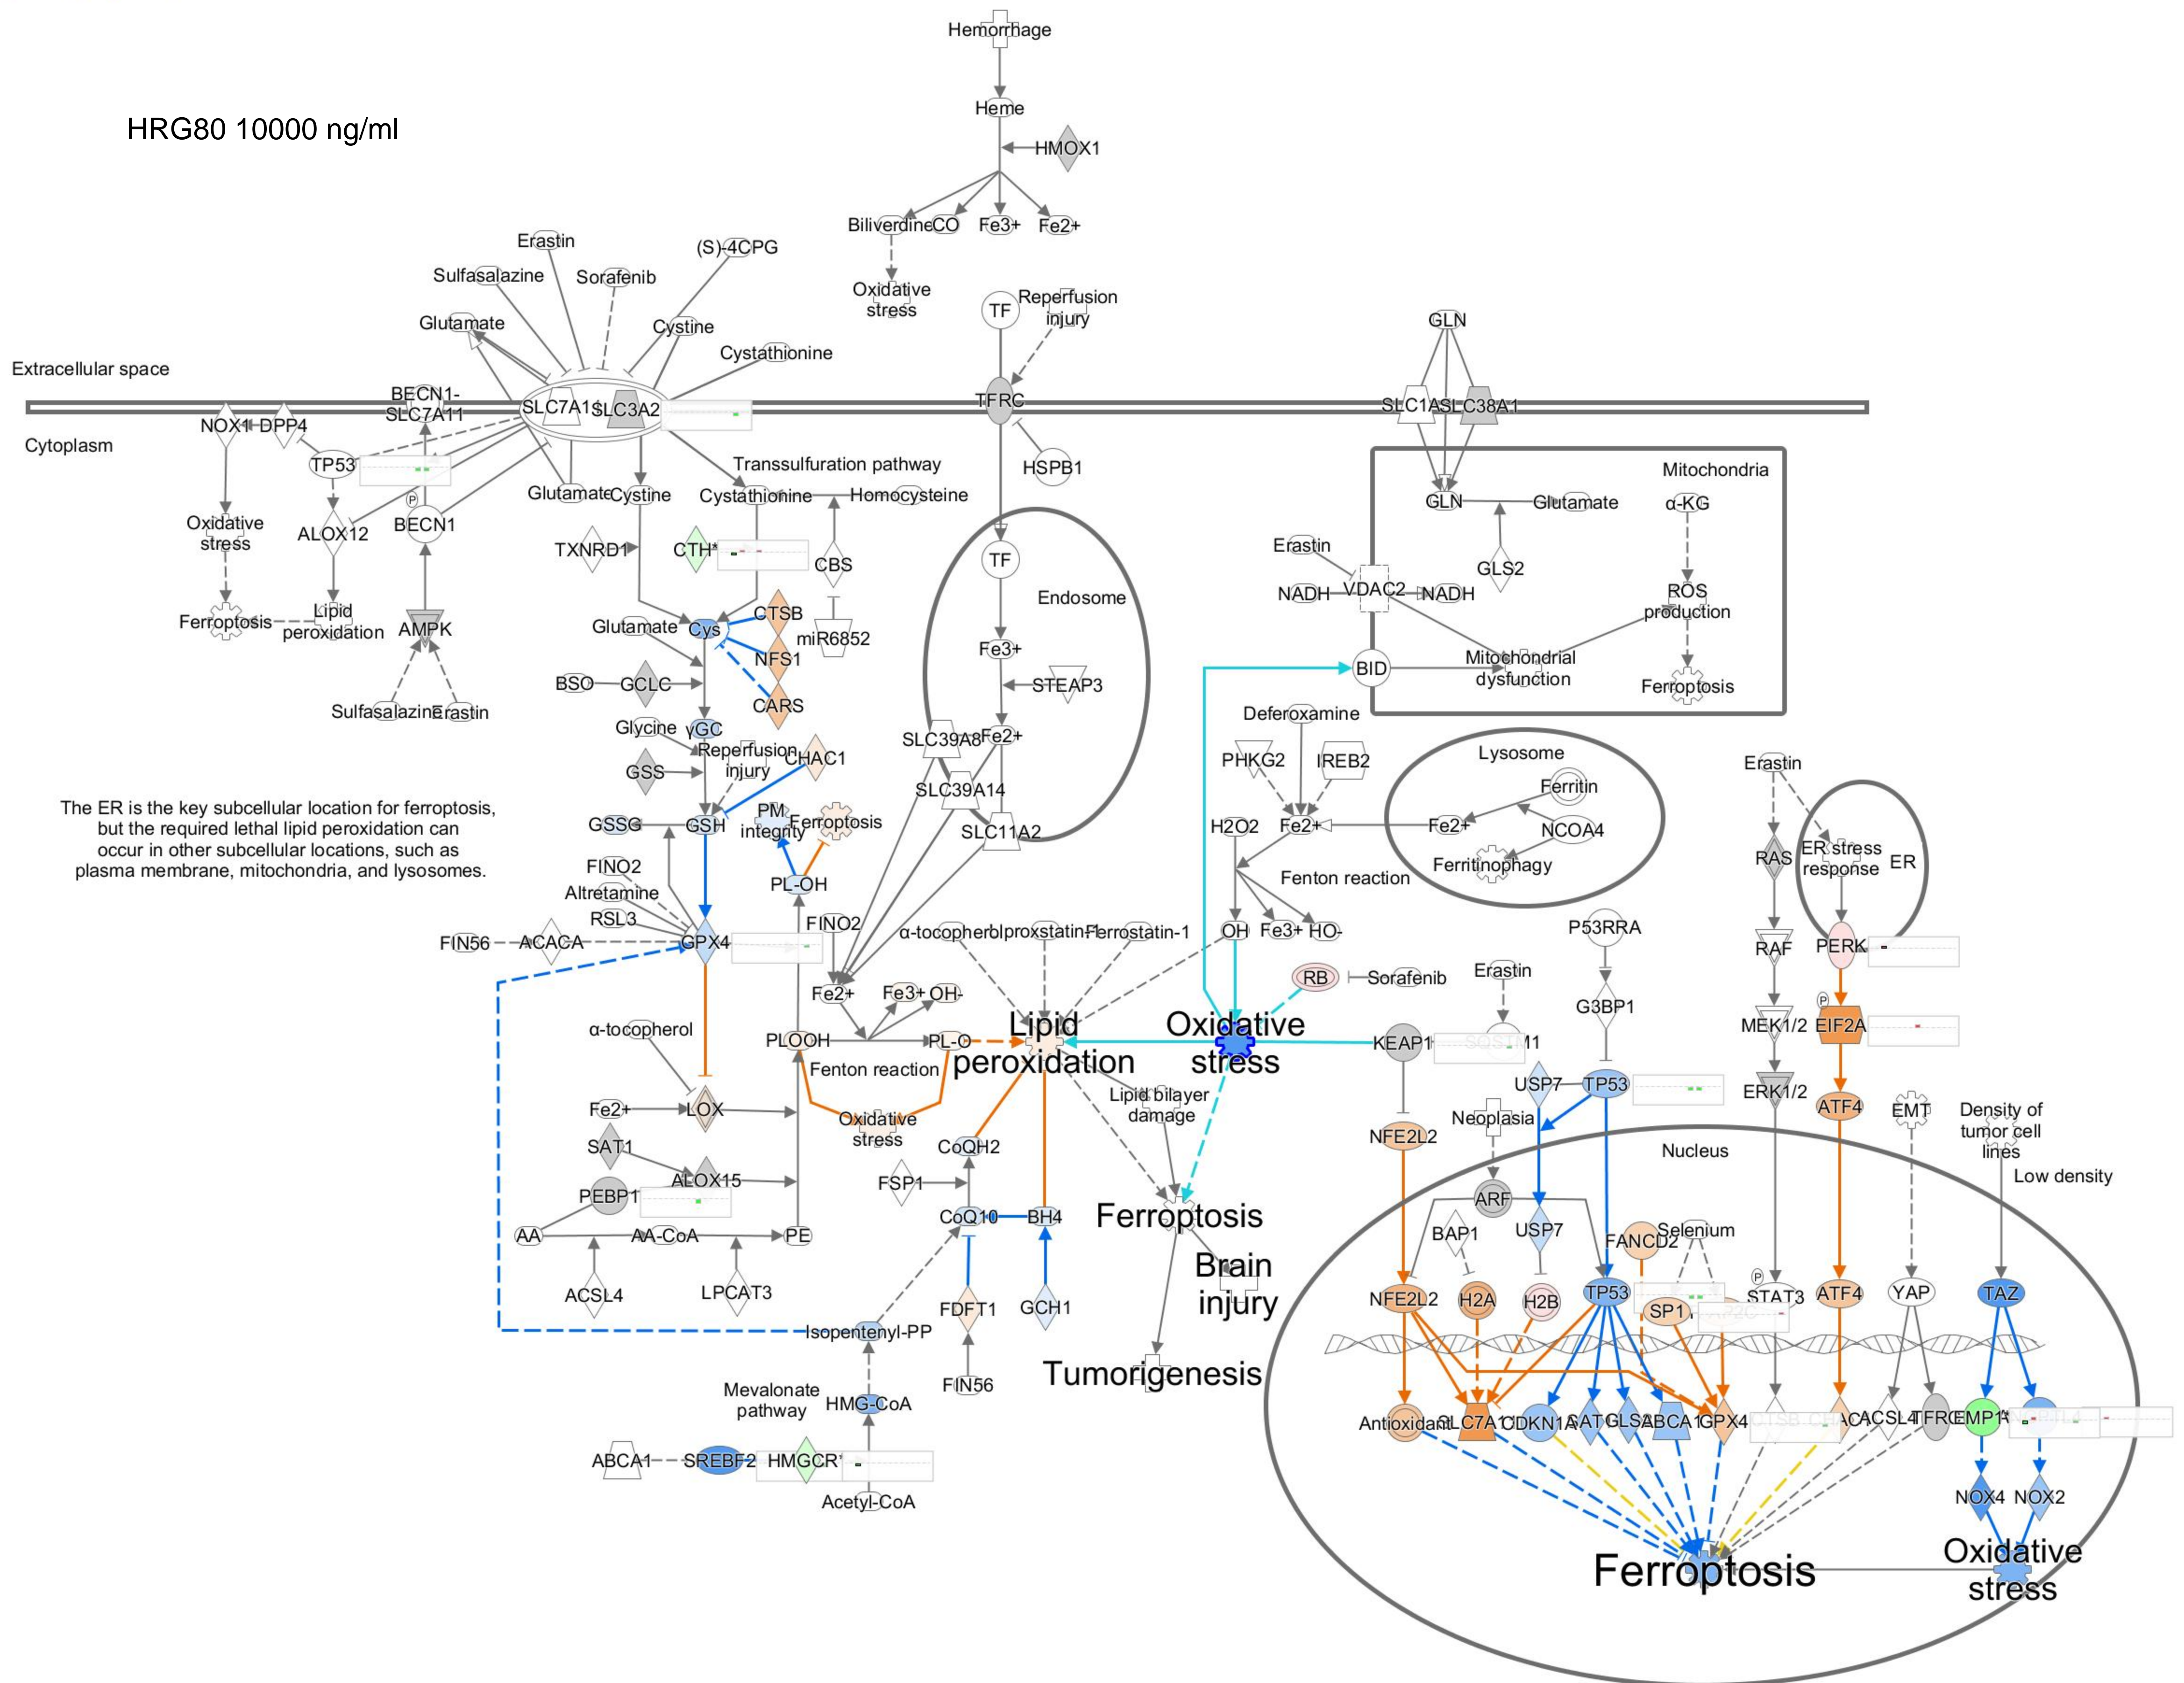



HRG80 1000 ng/ml

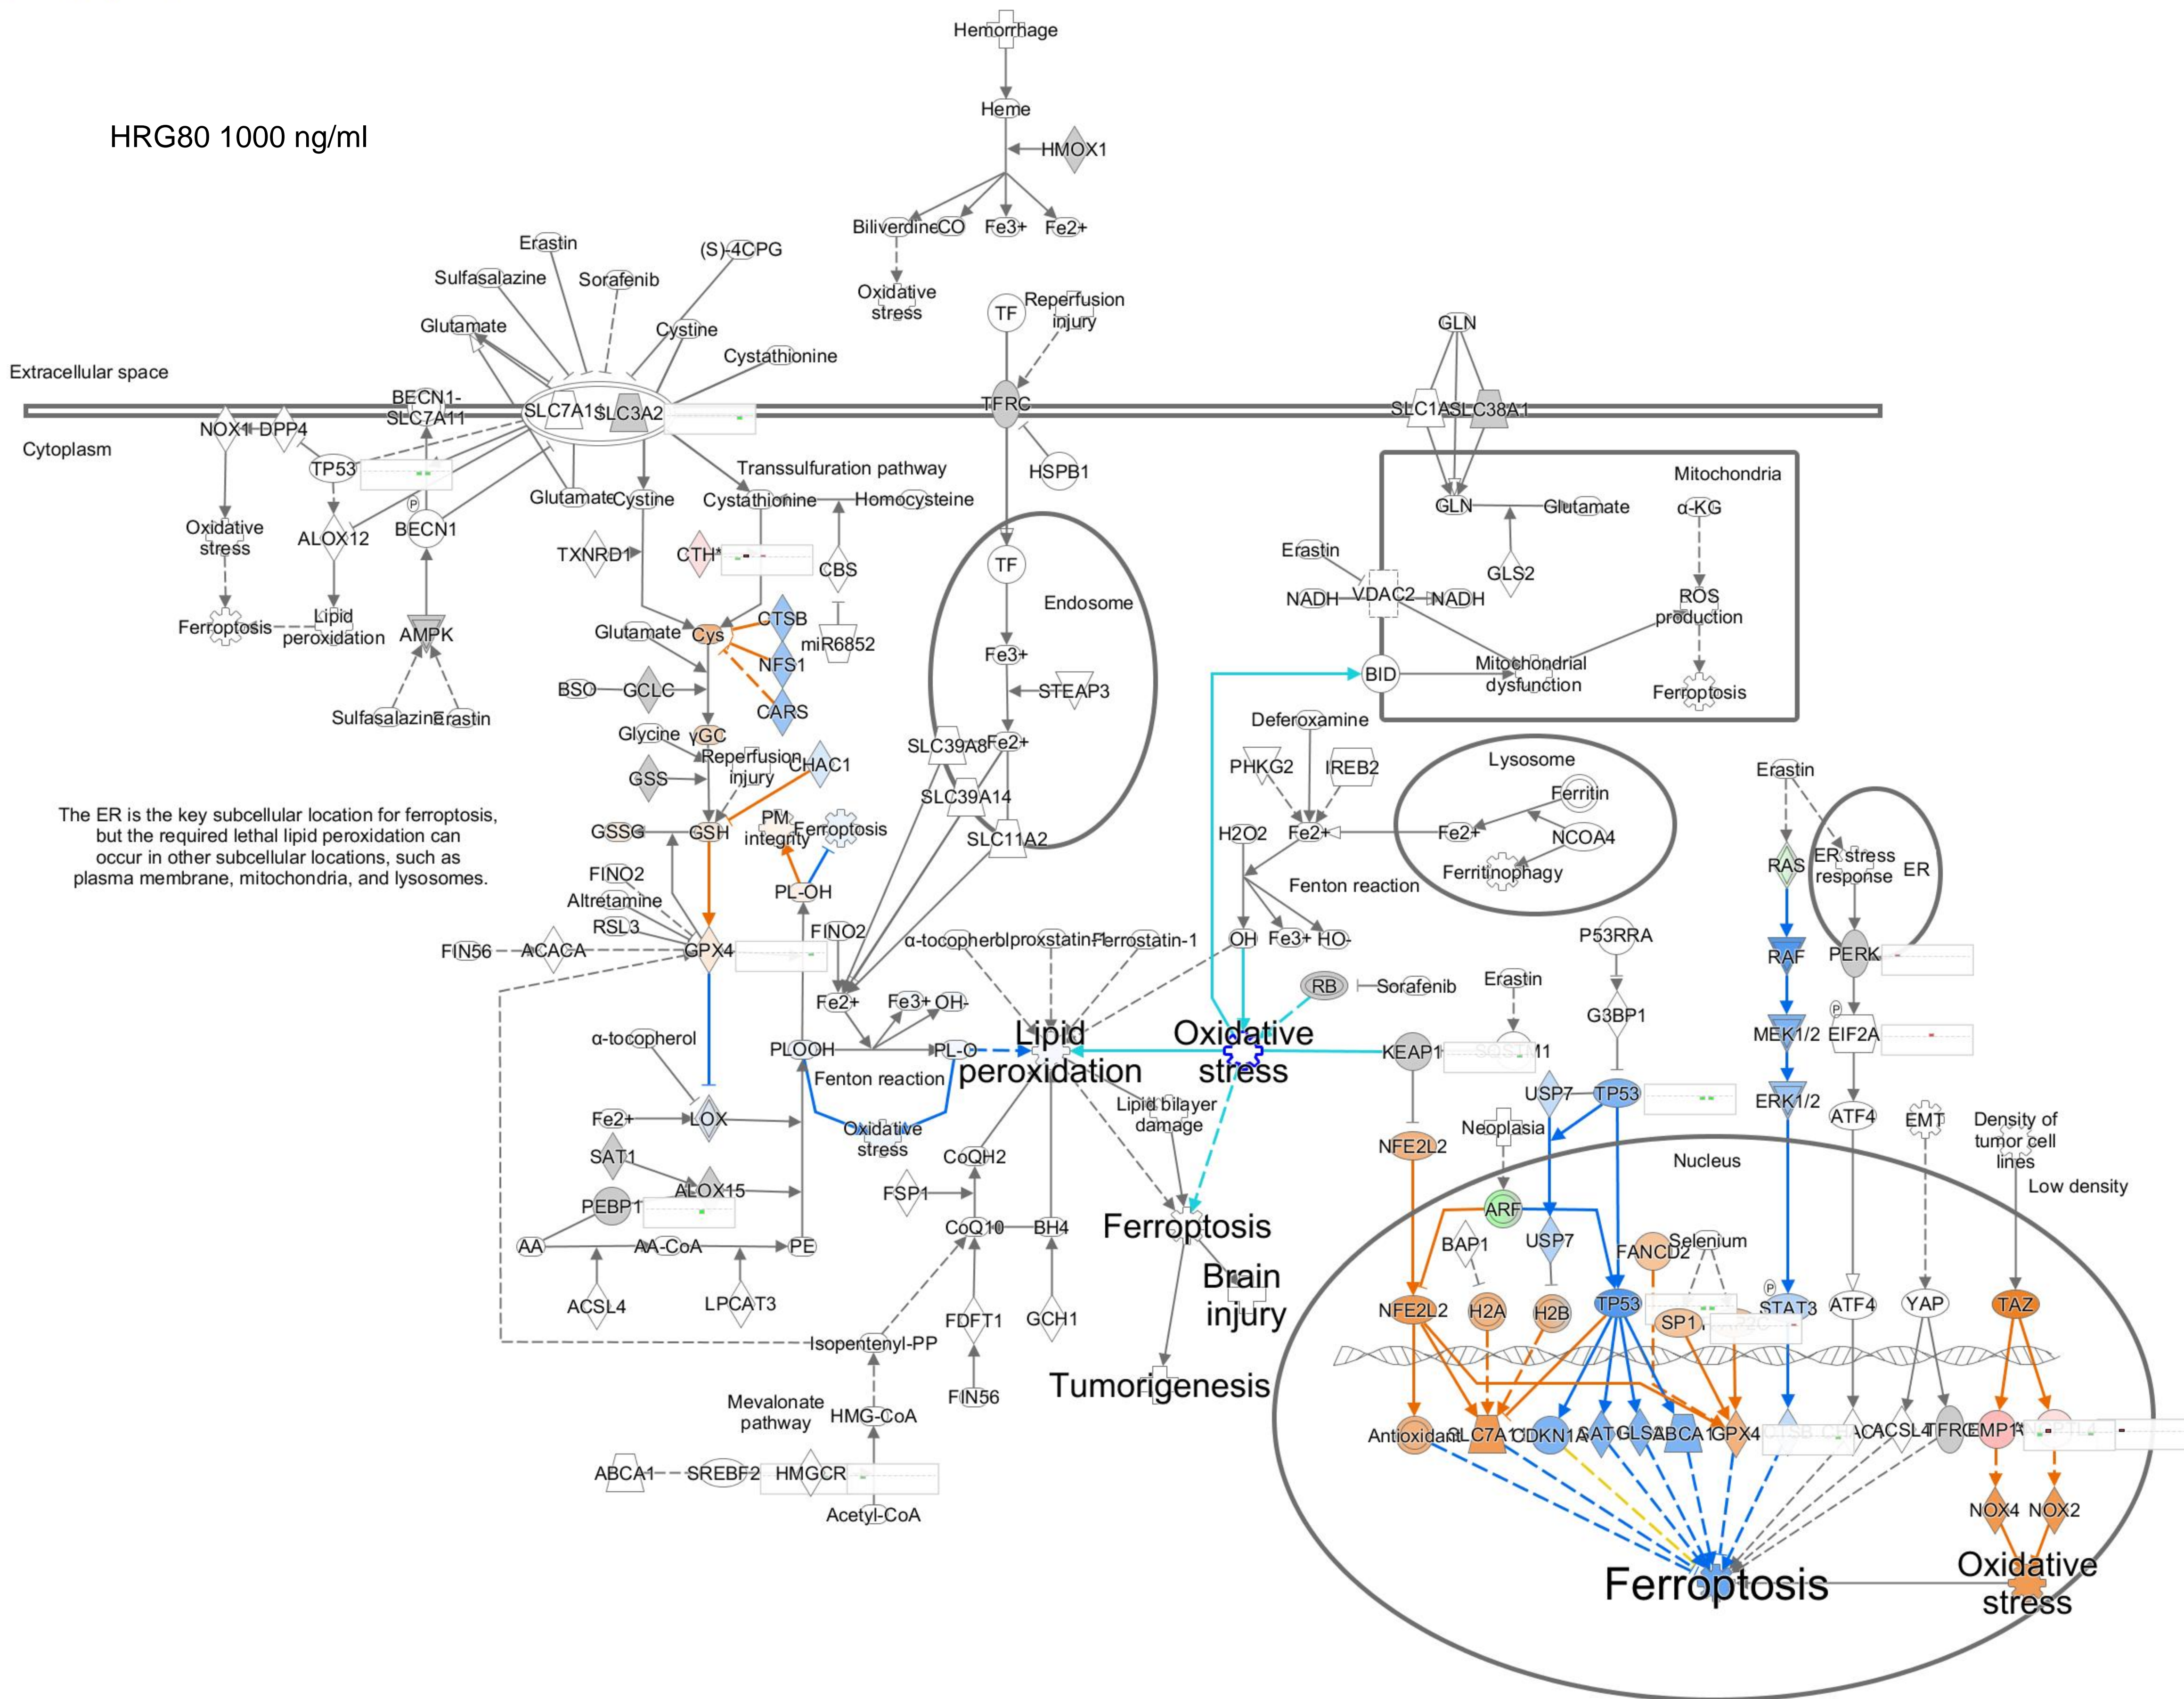



HRG80 100 ng/ml

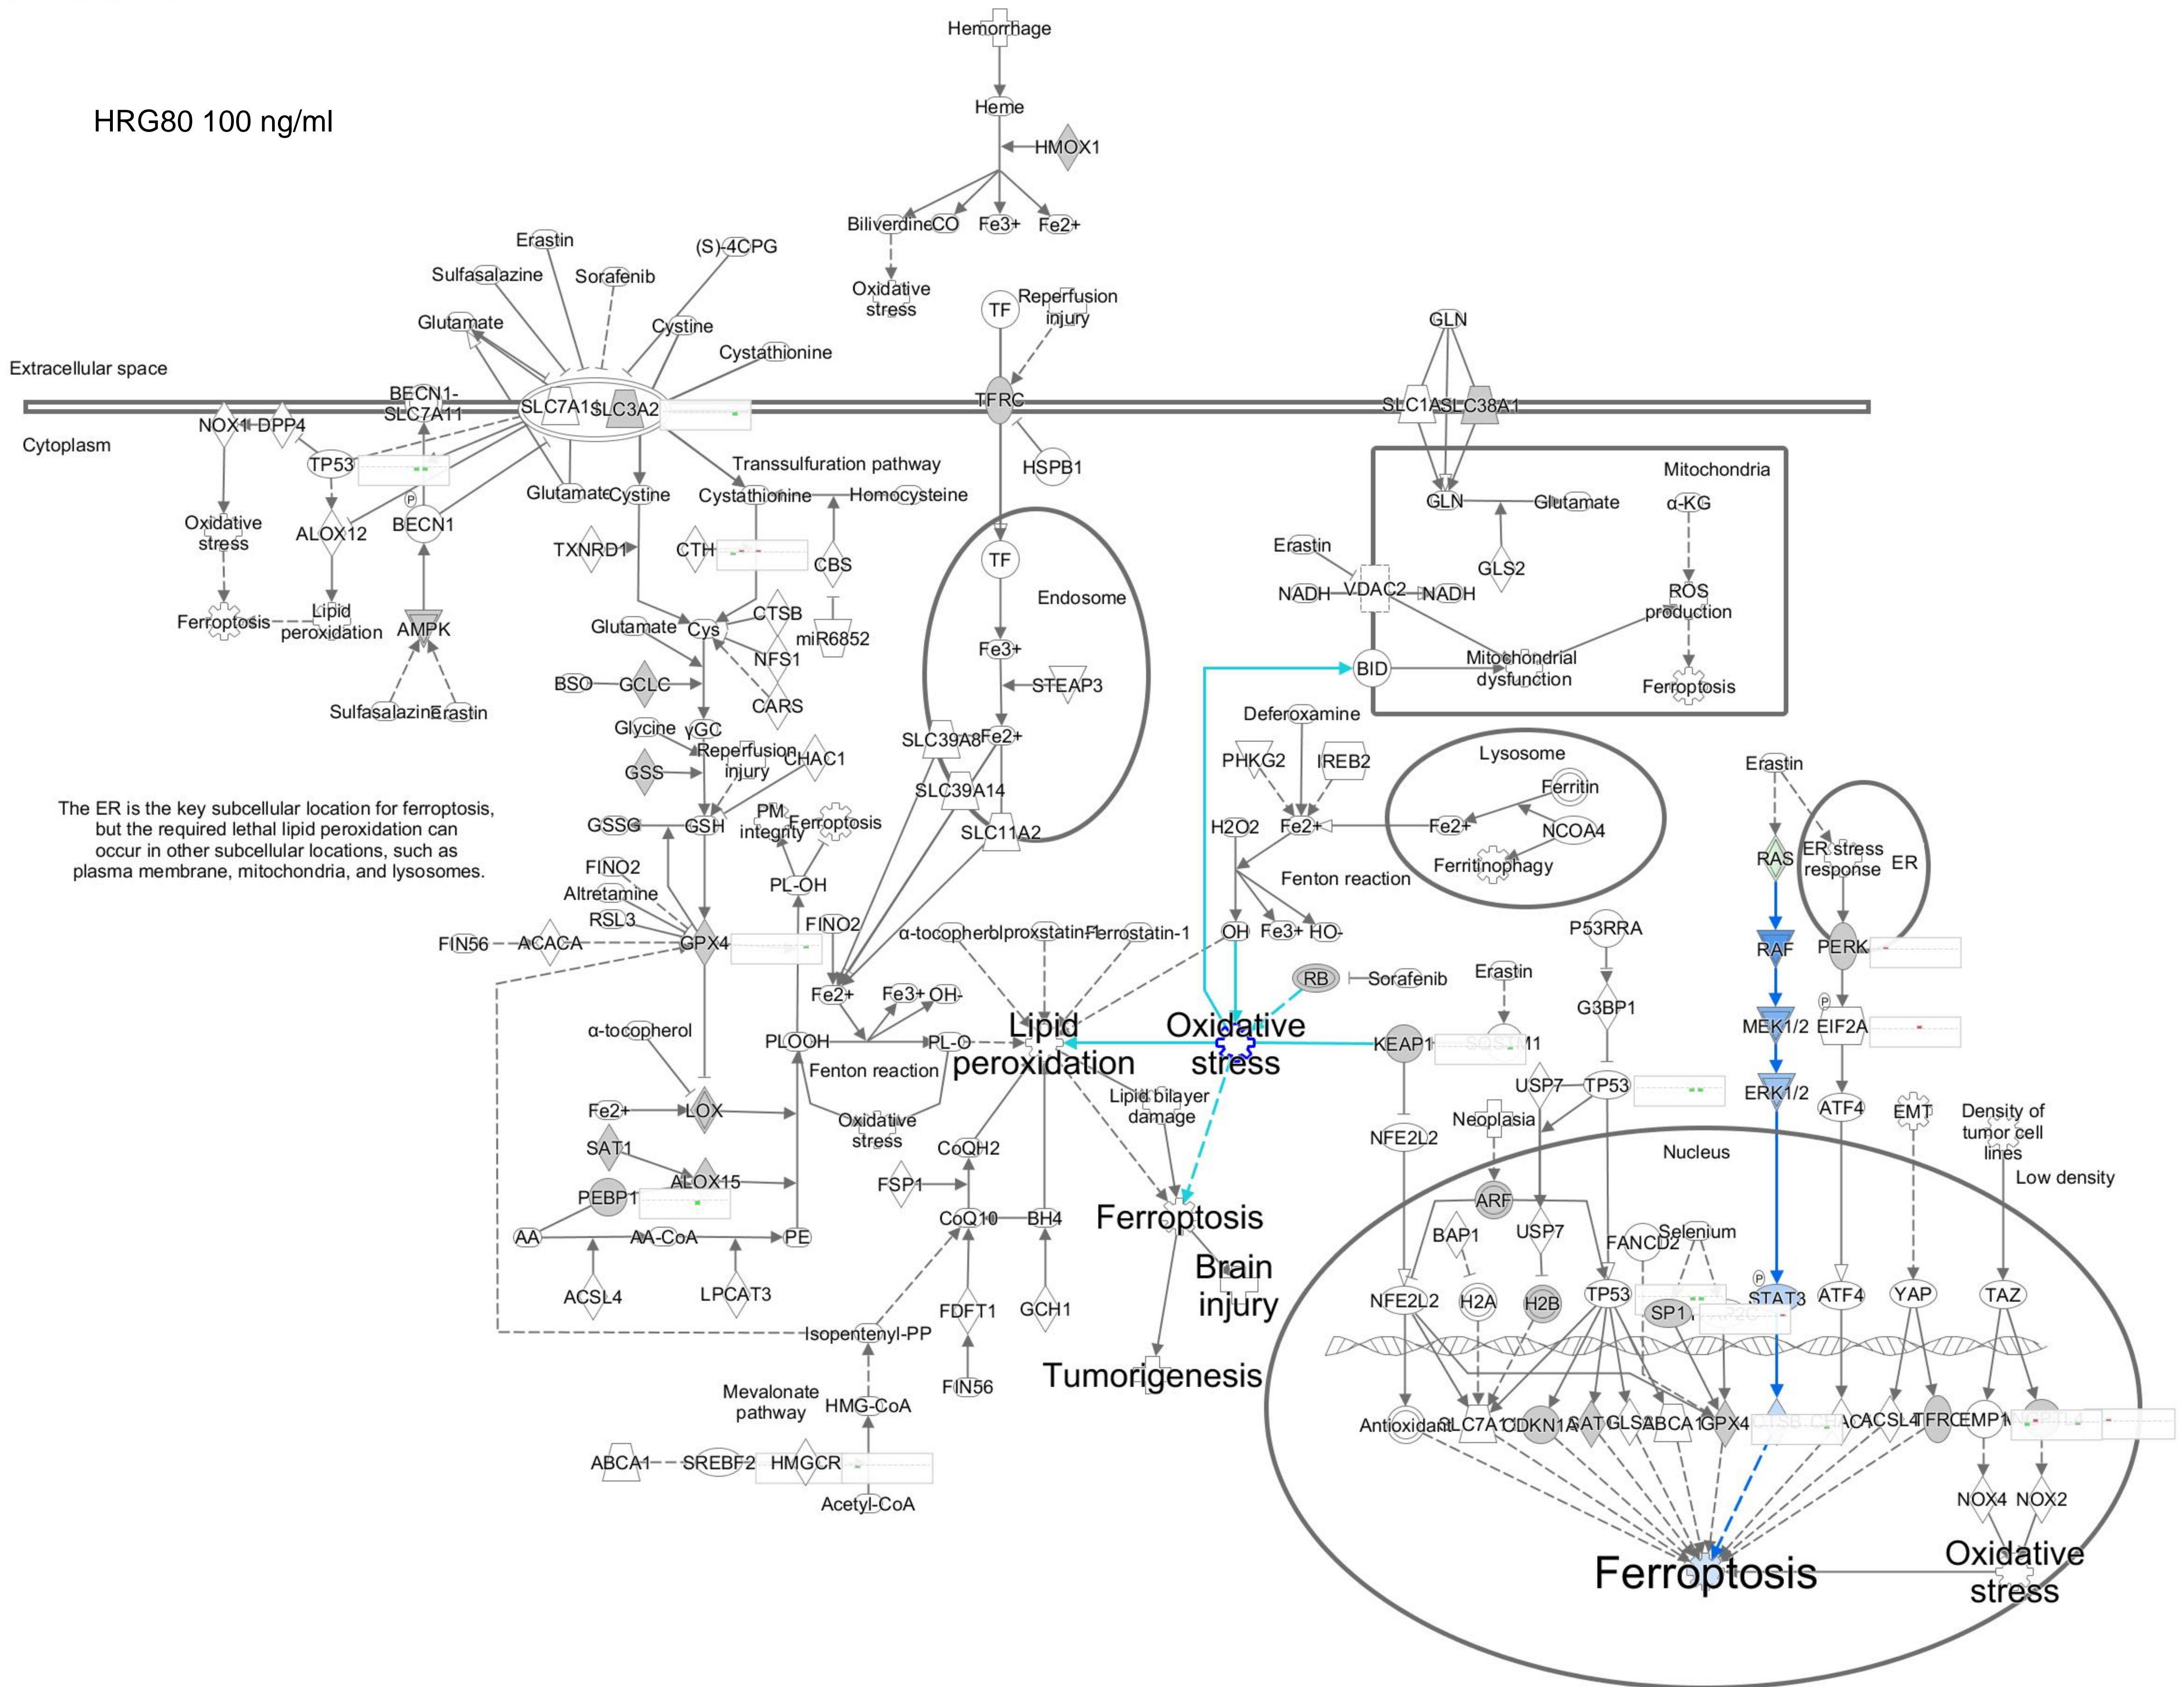



HRG80 10 ng/ml

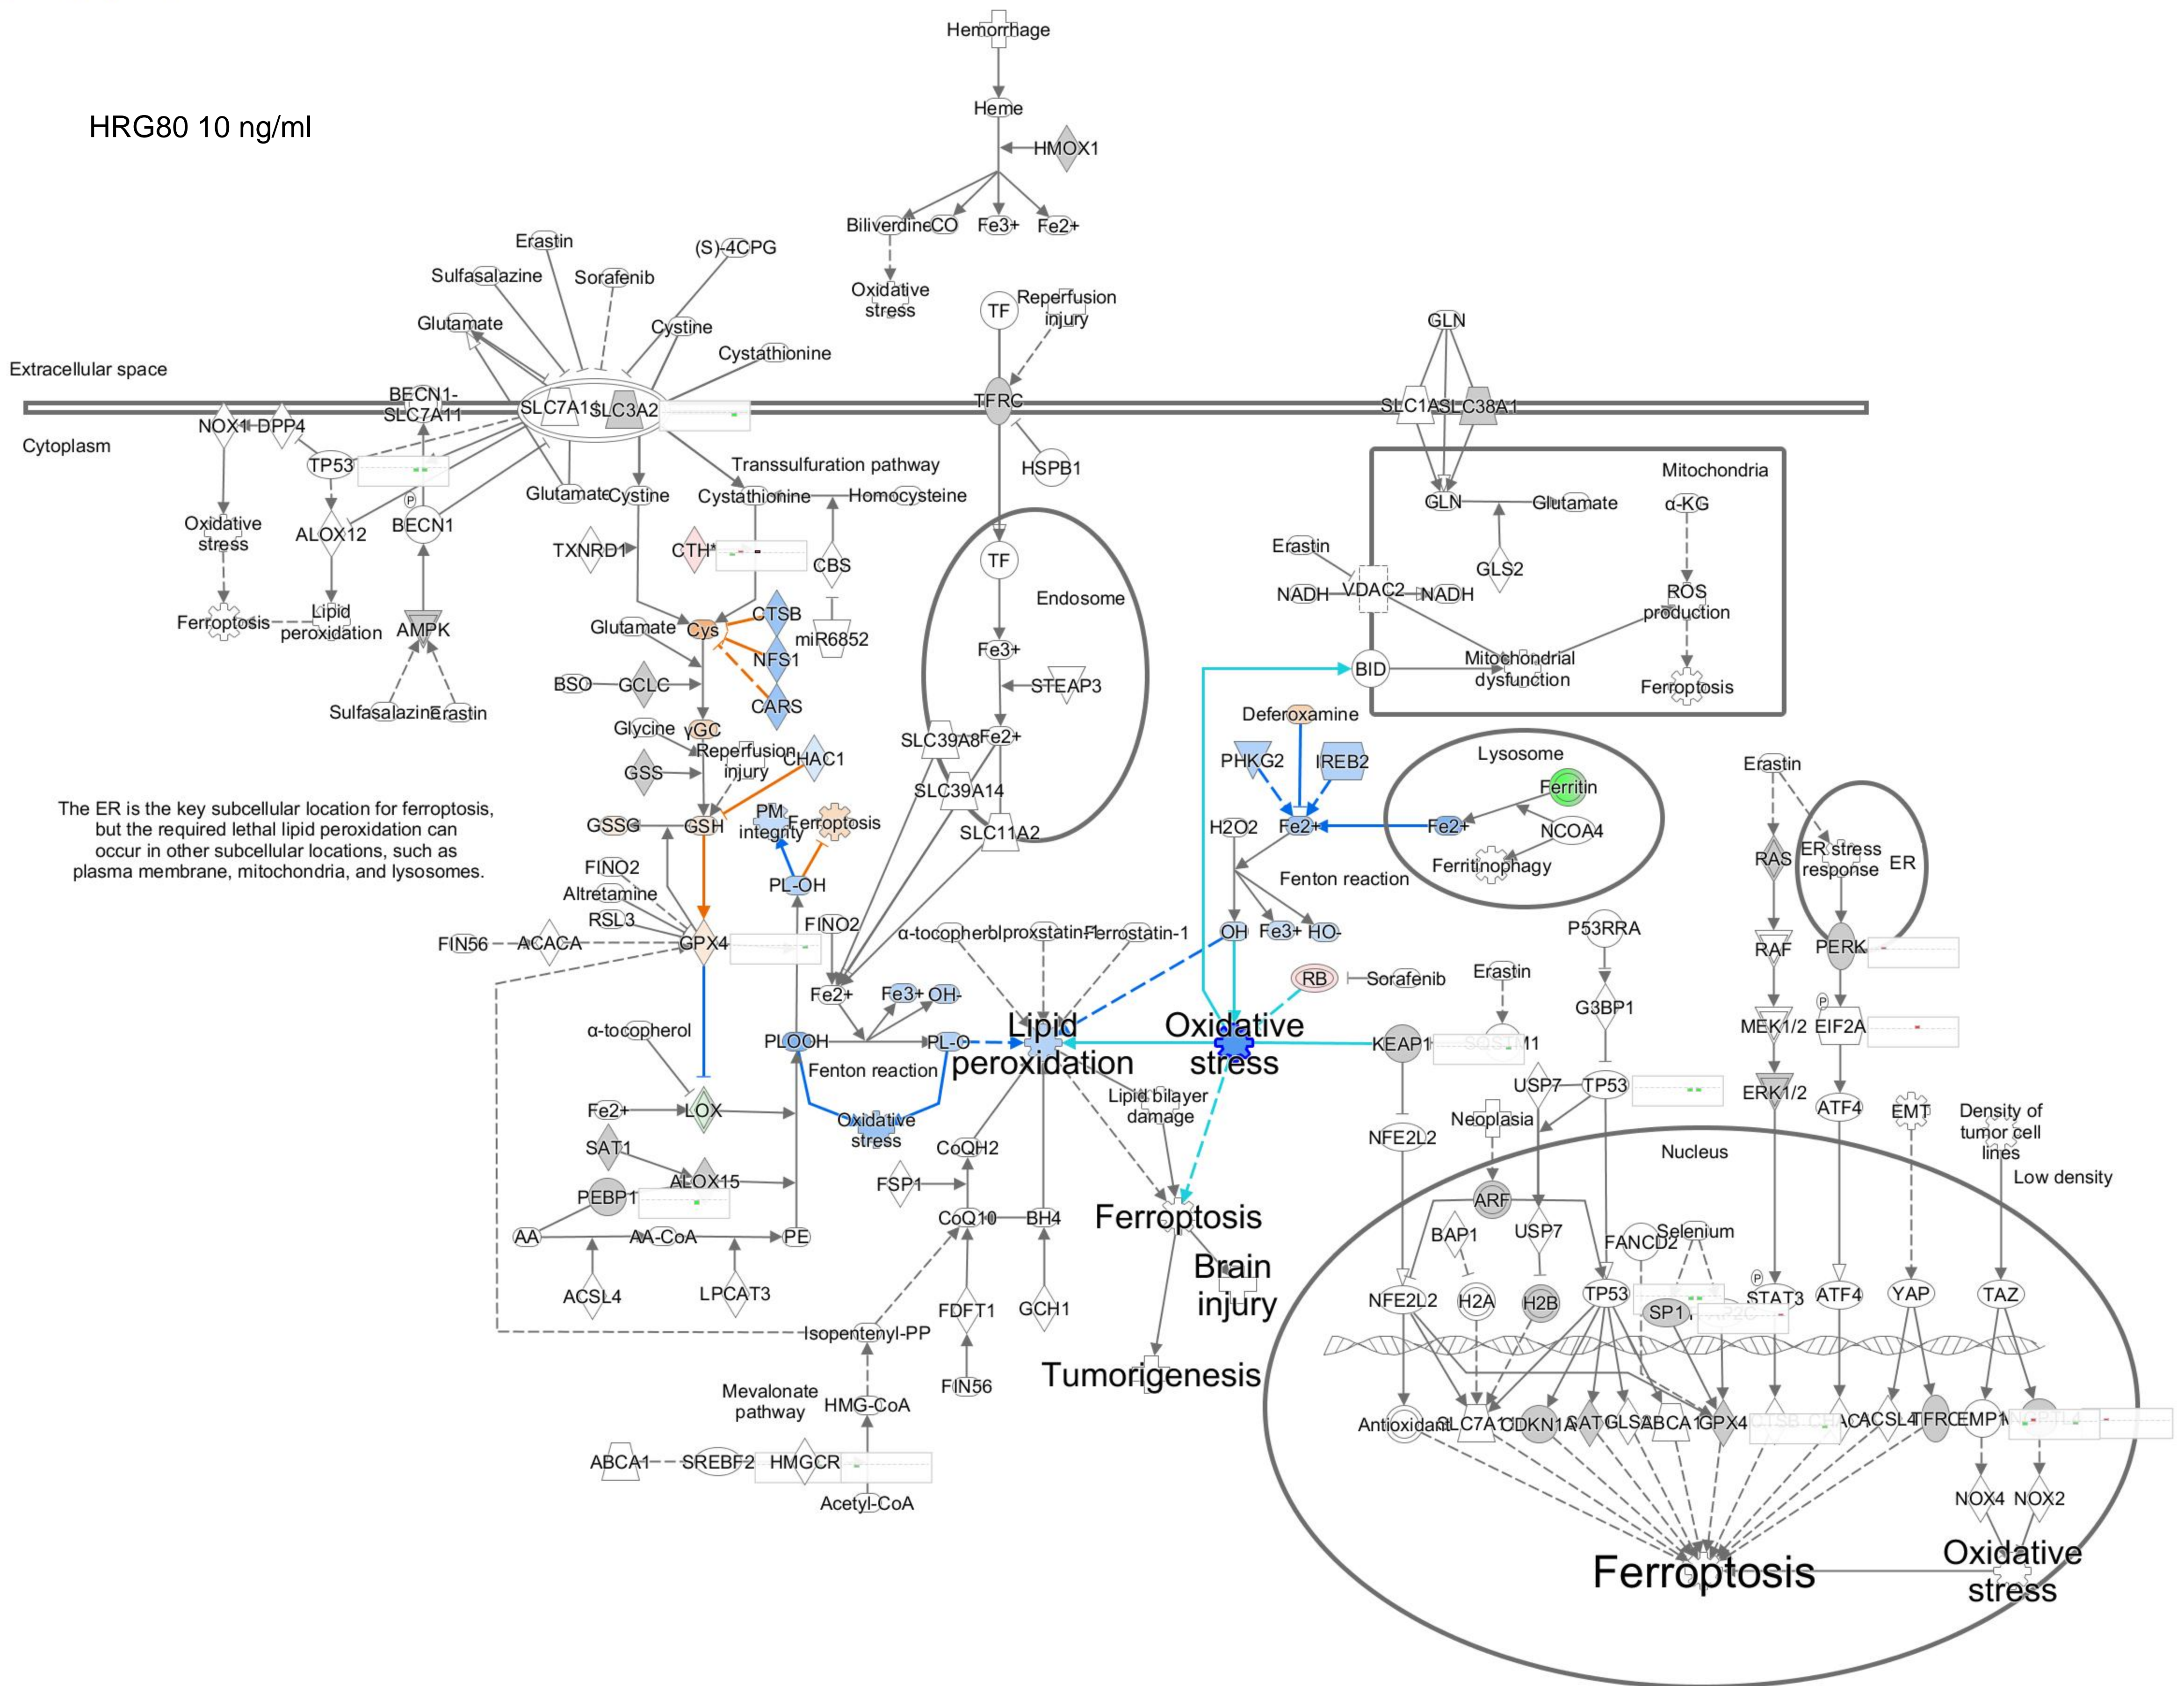



HRG80 0.01 ng/ml

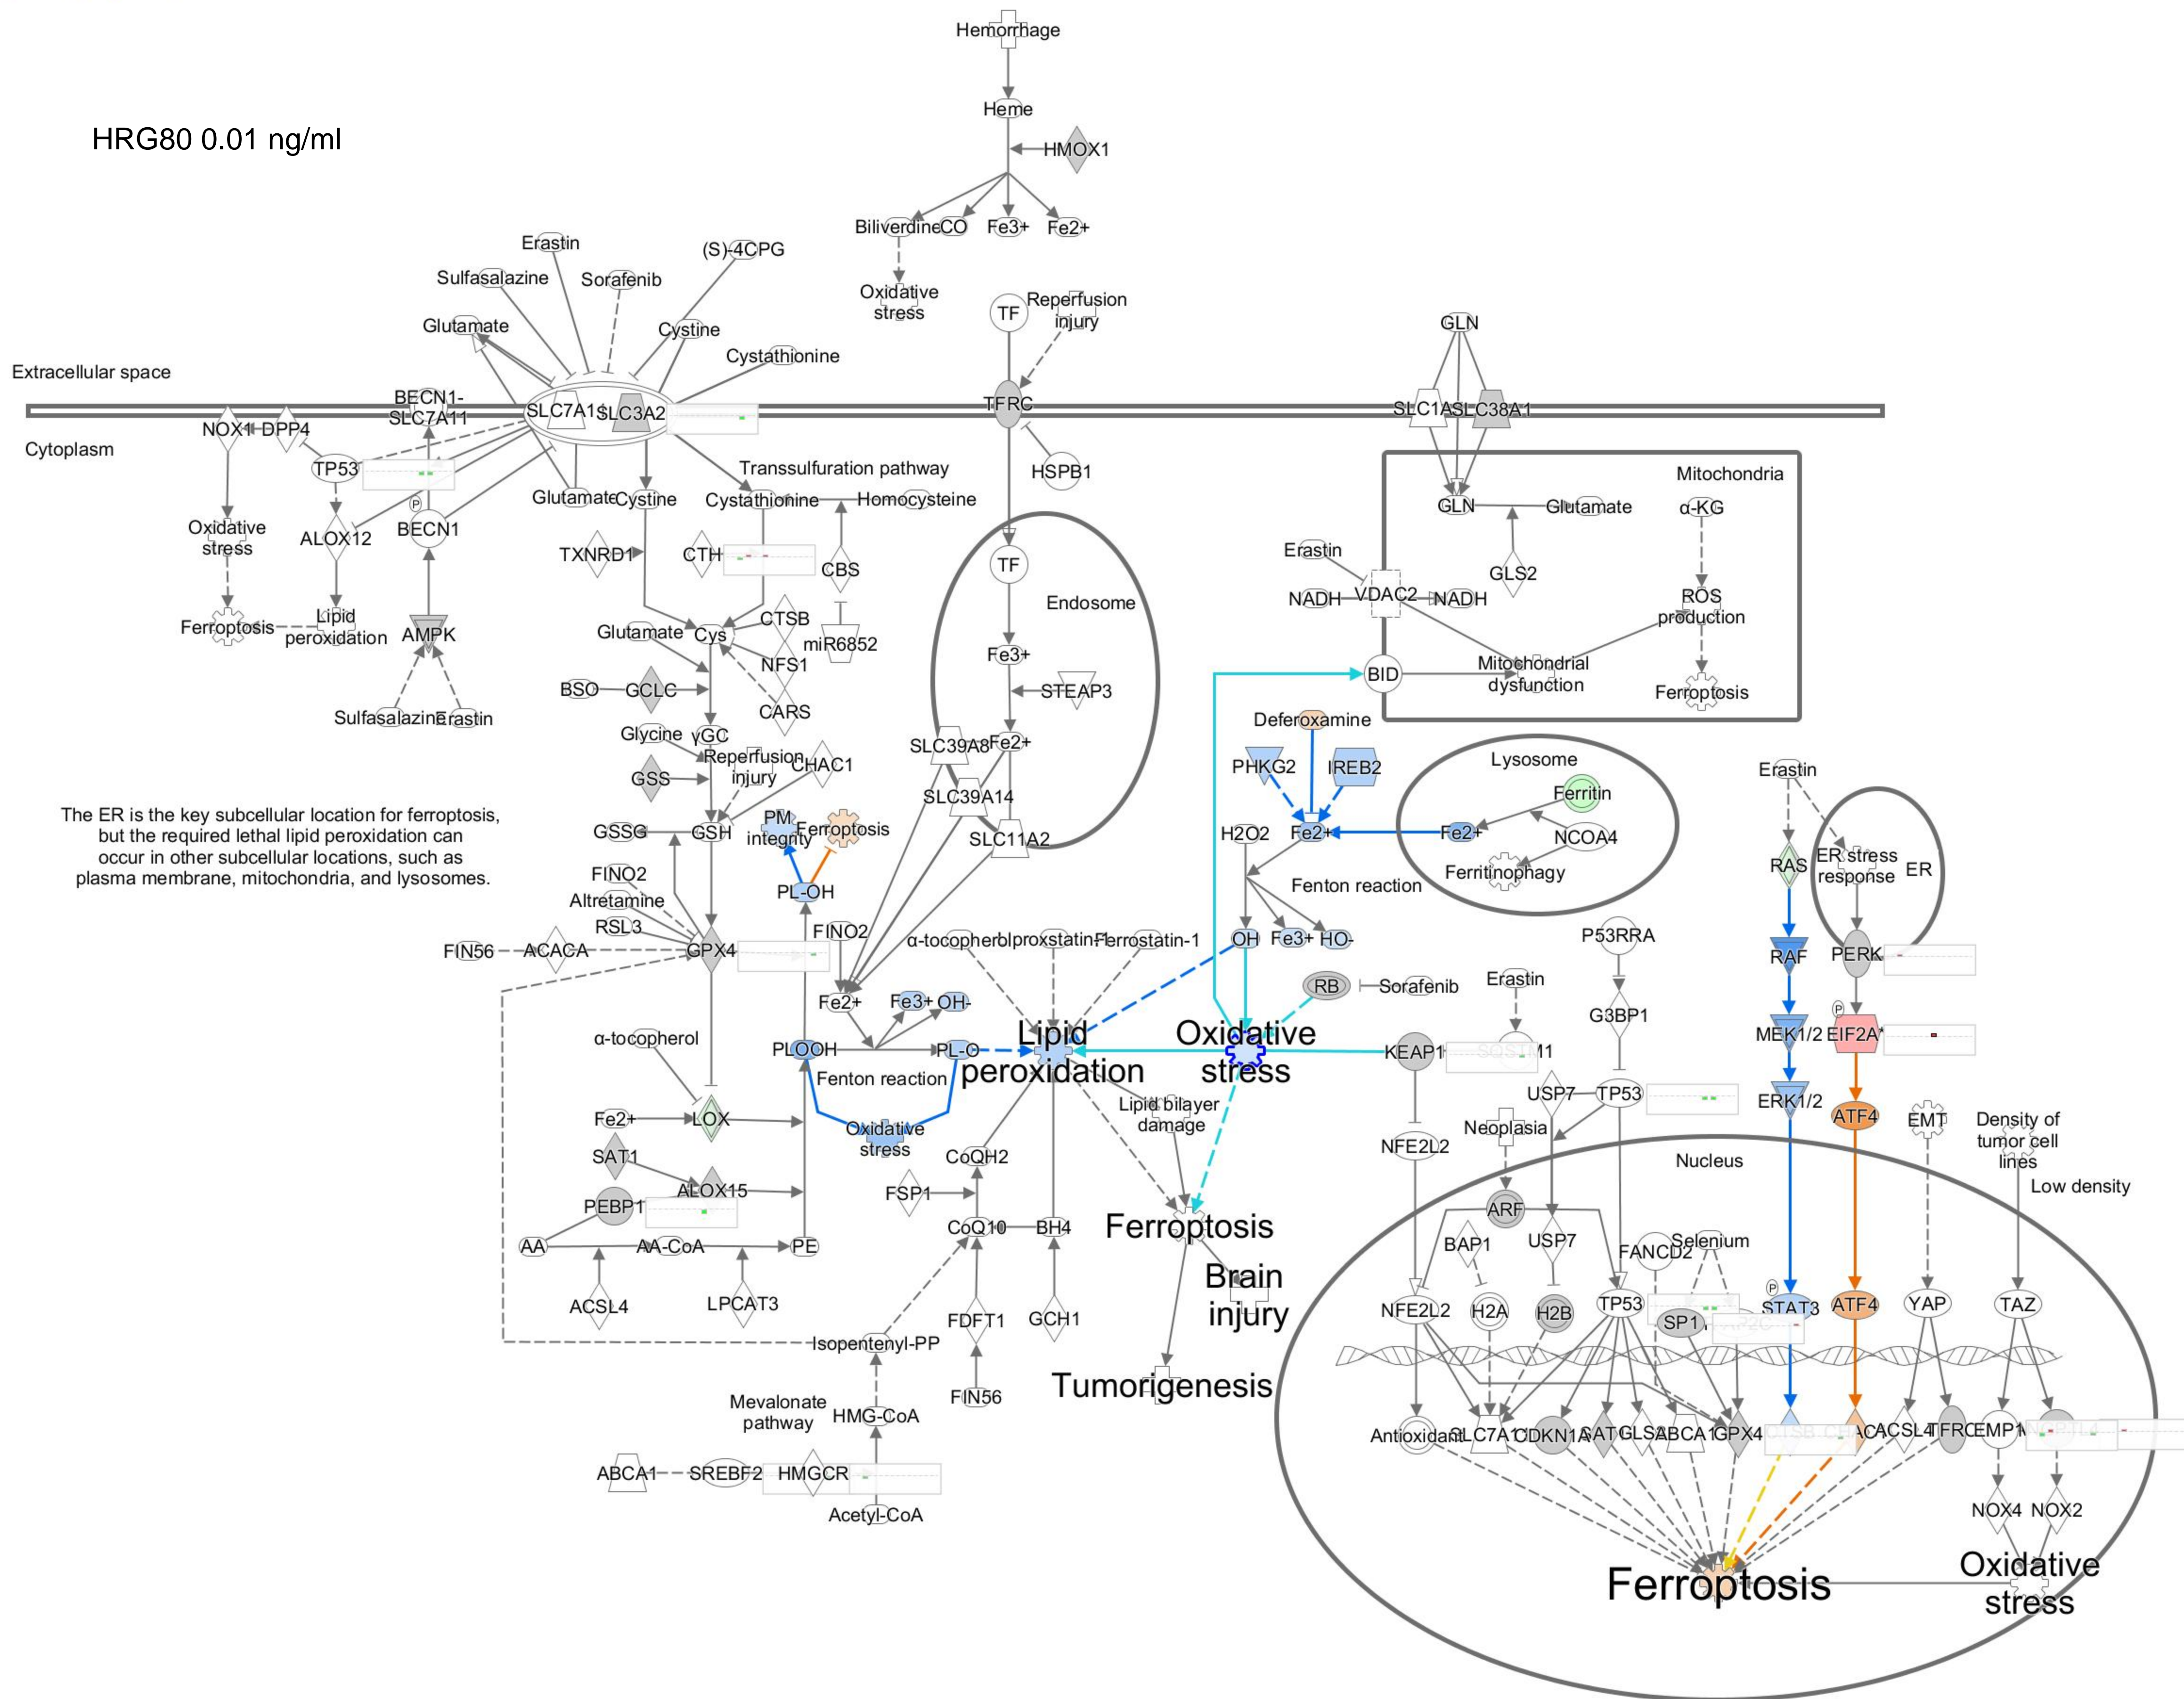



Rb1 100 nM

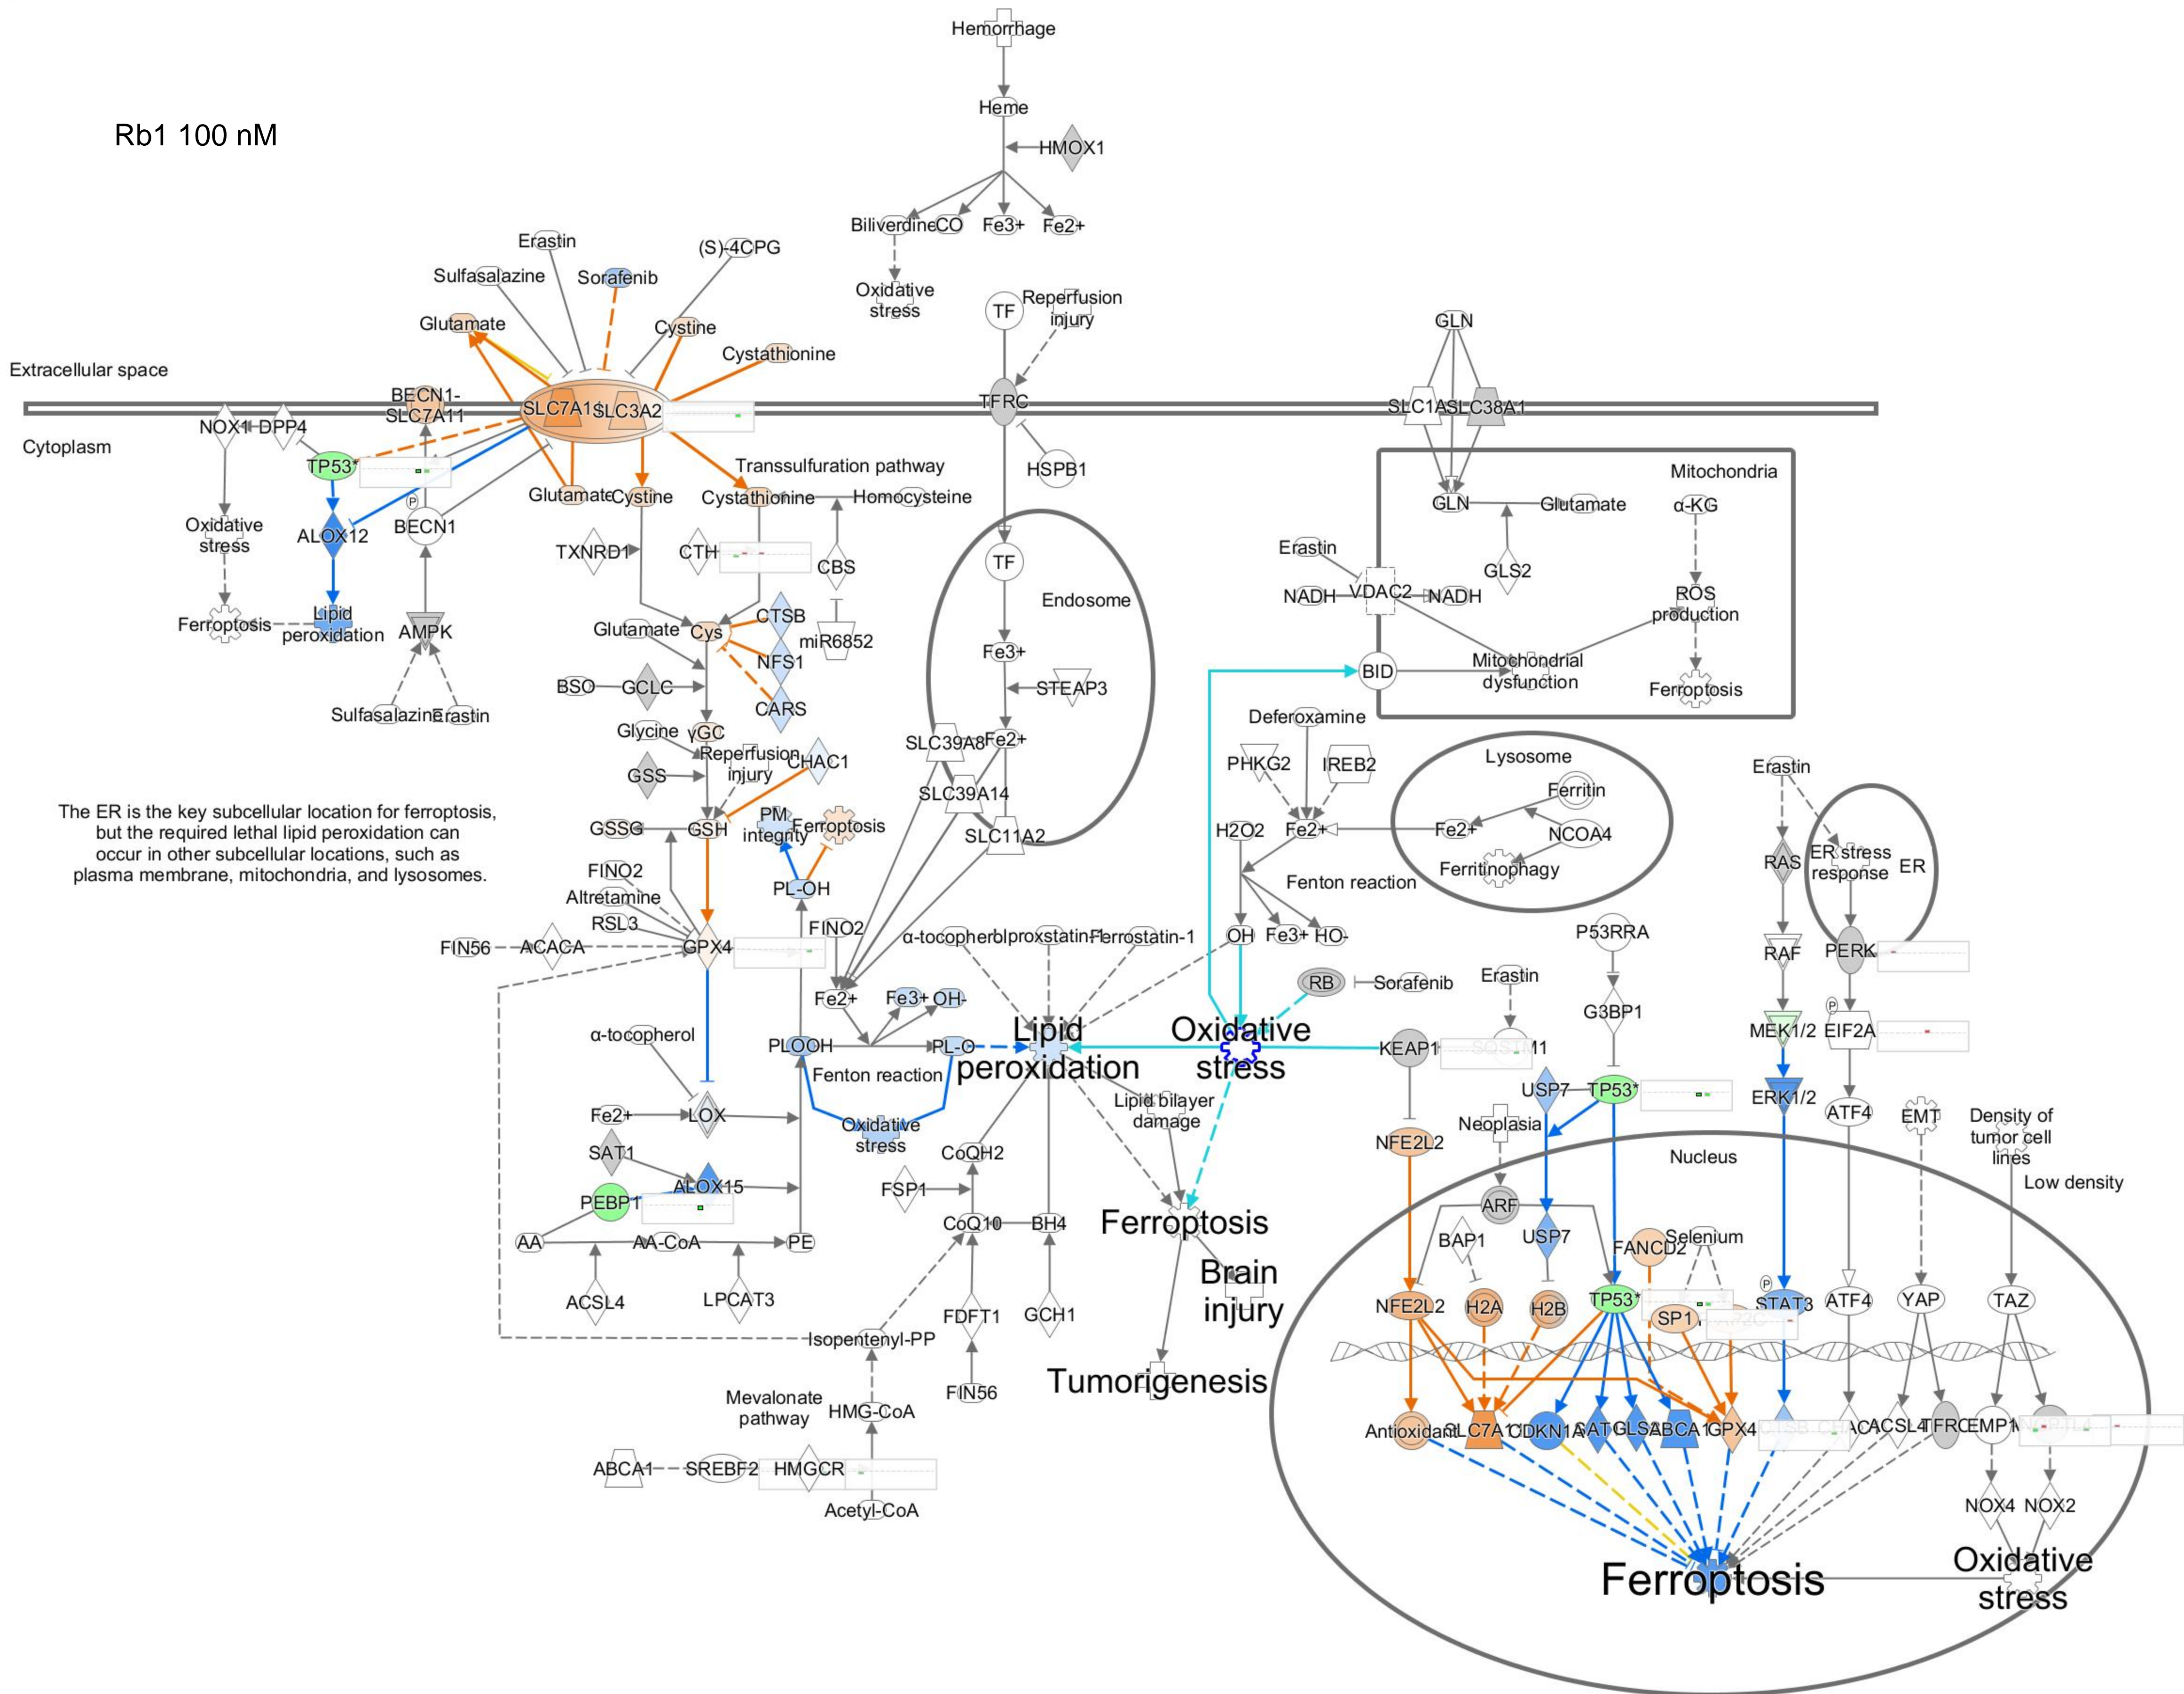



Rg3 100 nM

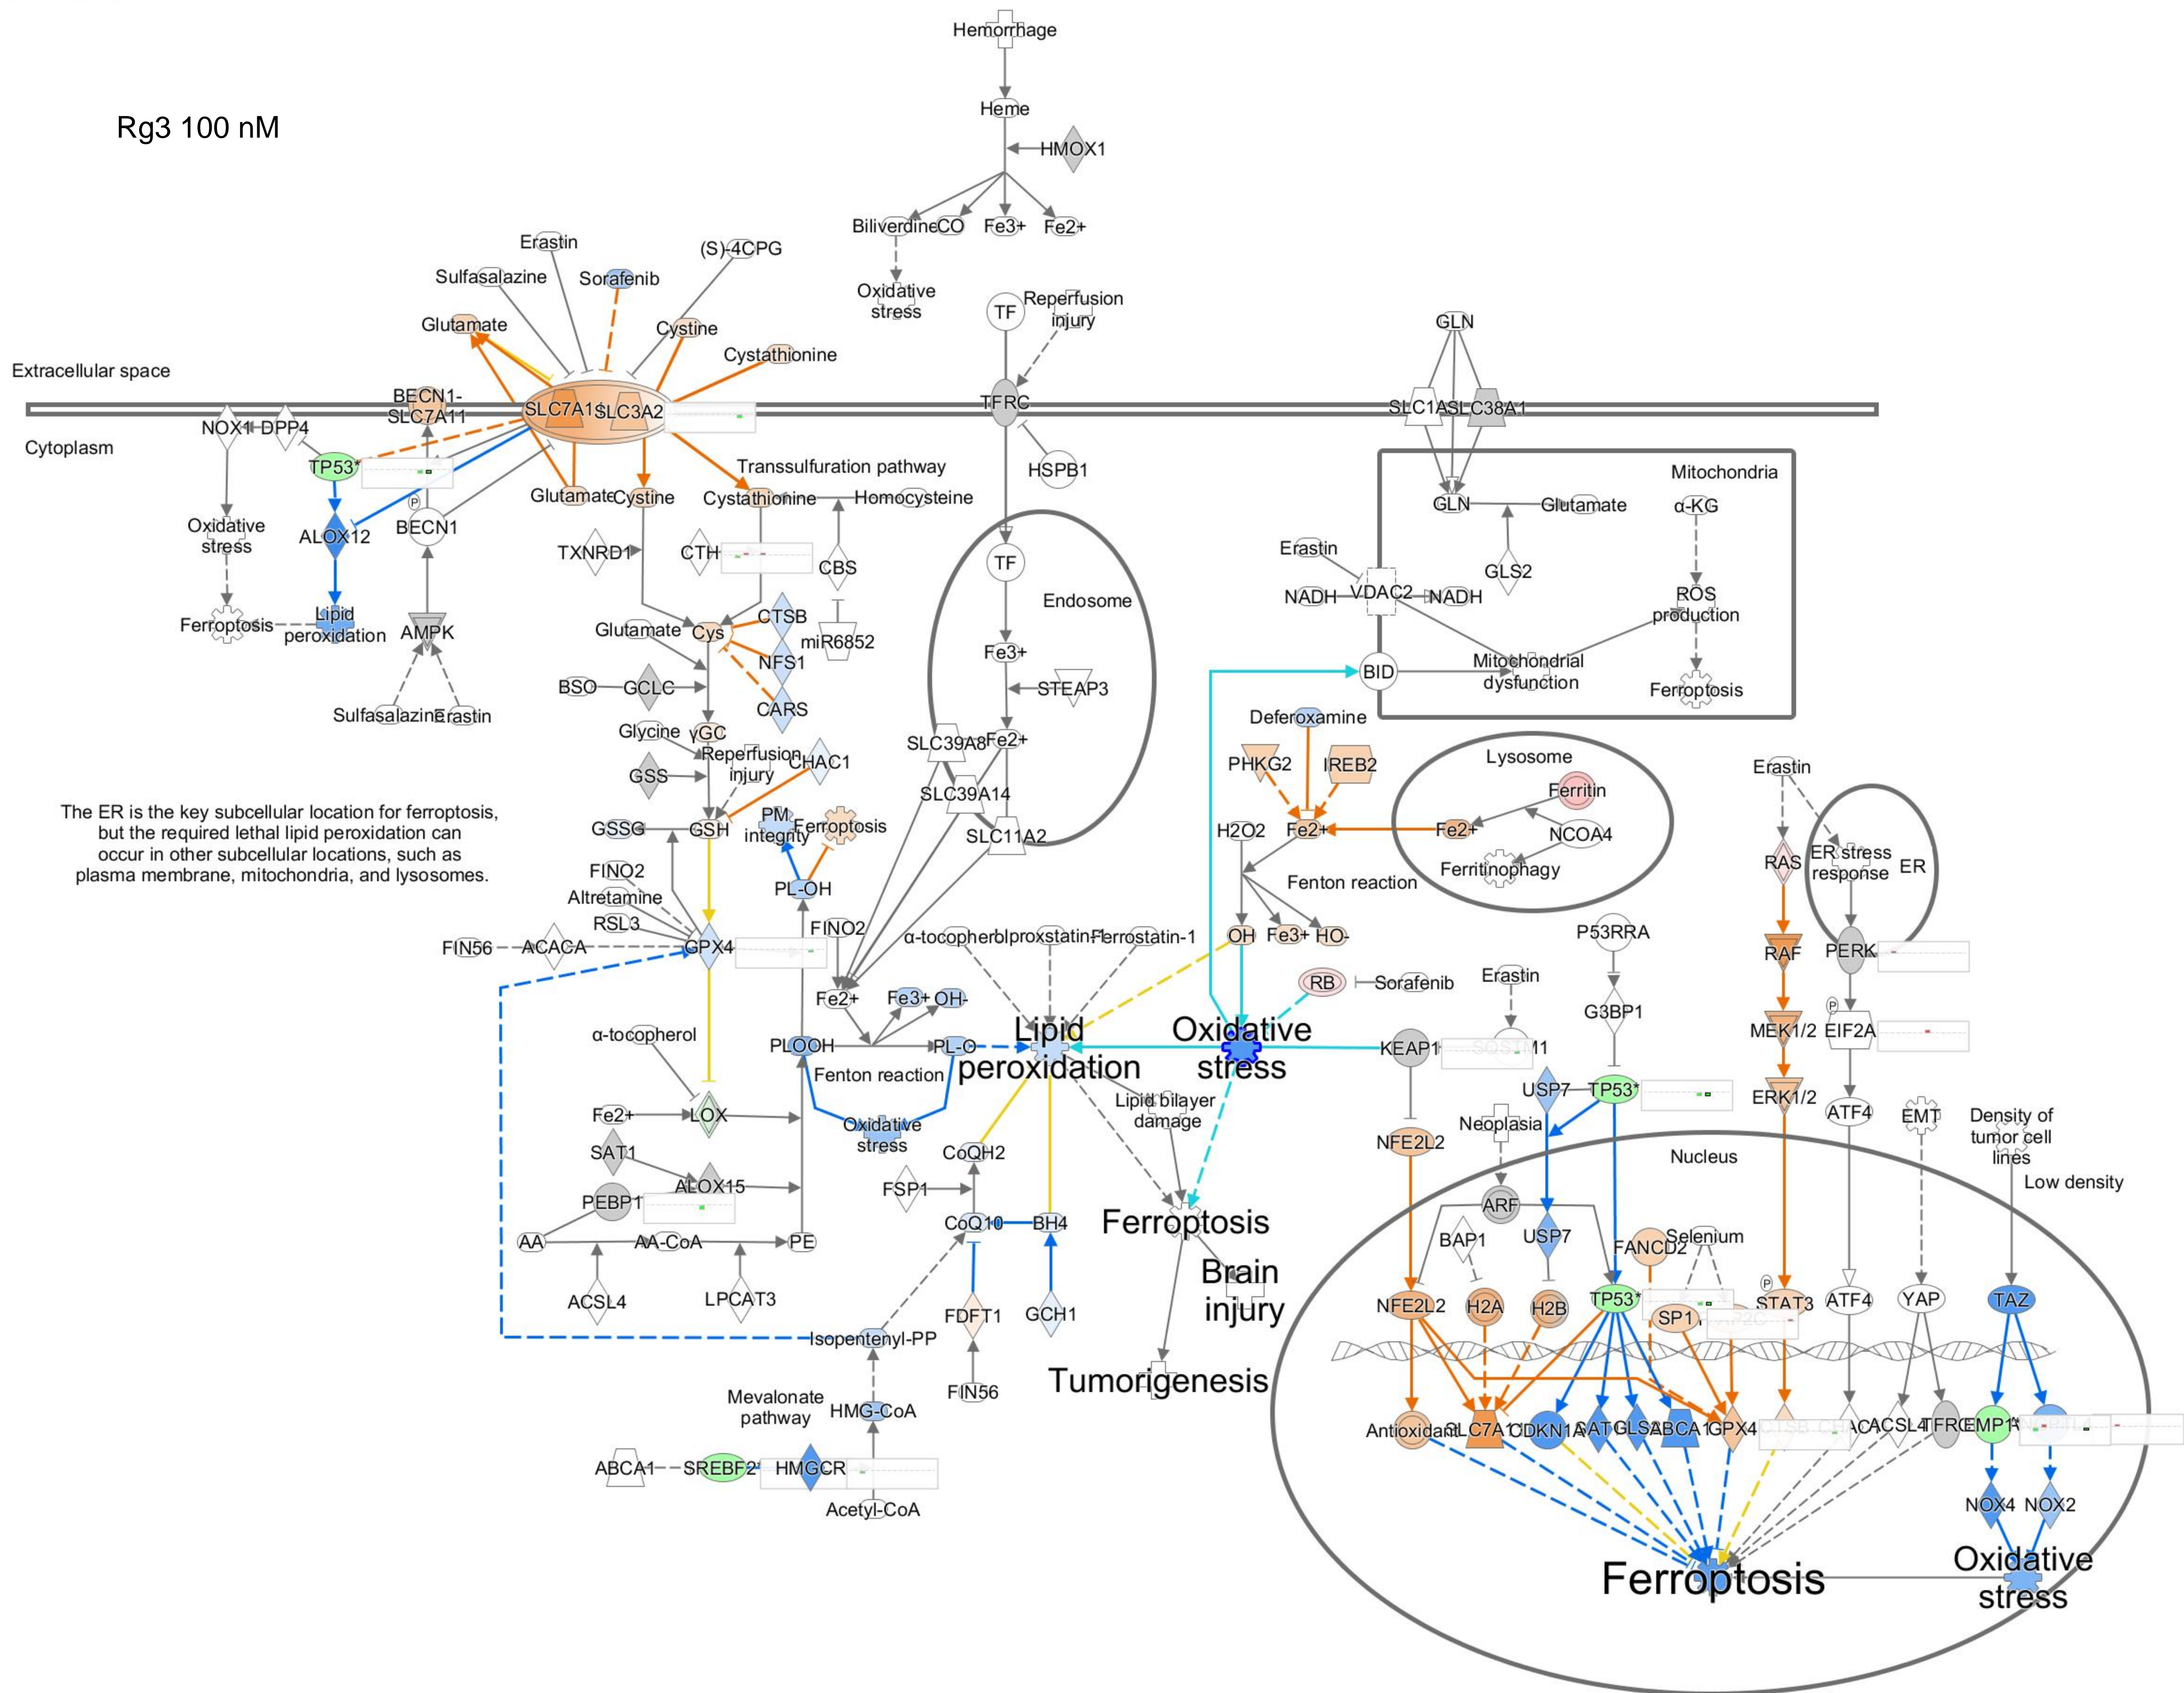



Rg5 100 nM

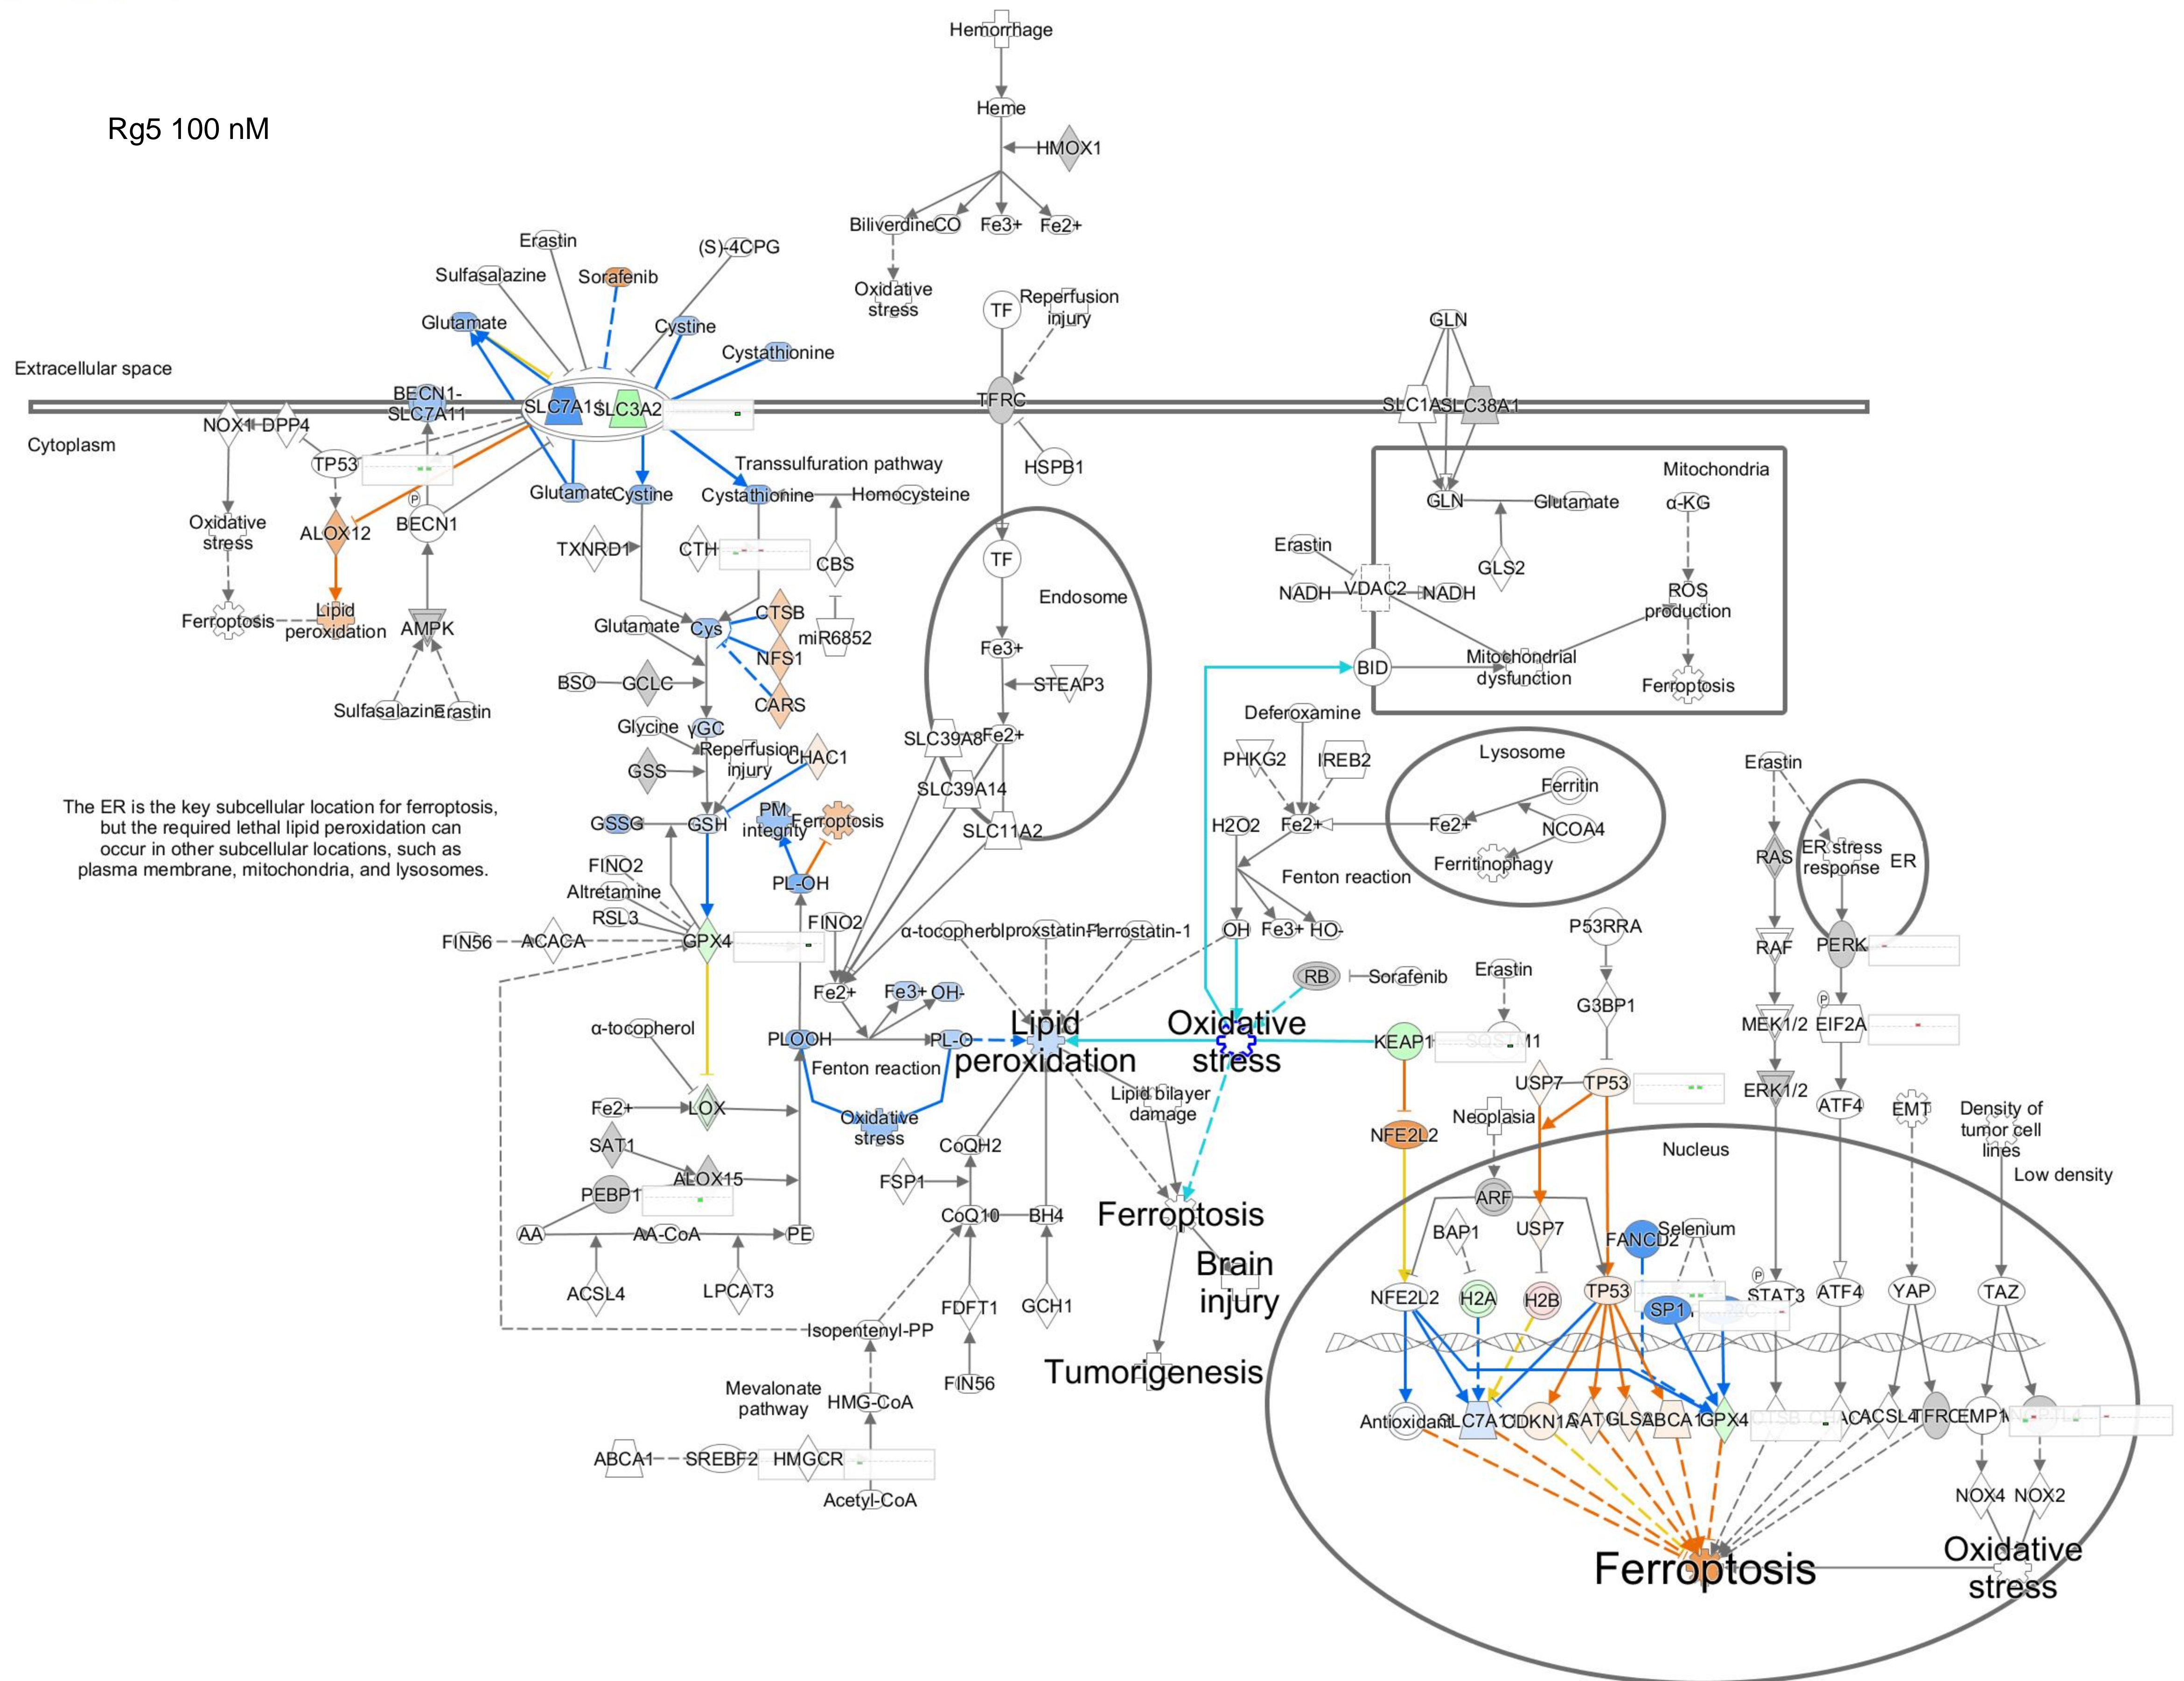



Rk1 100 nM

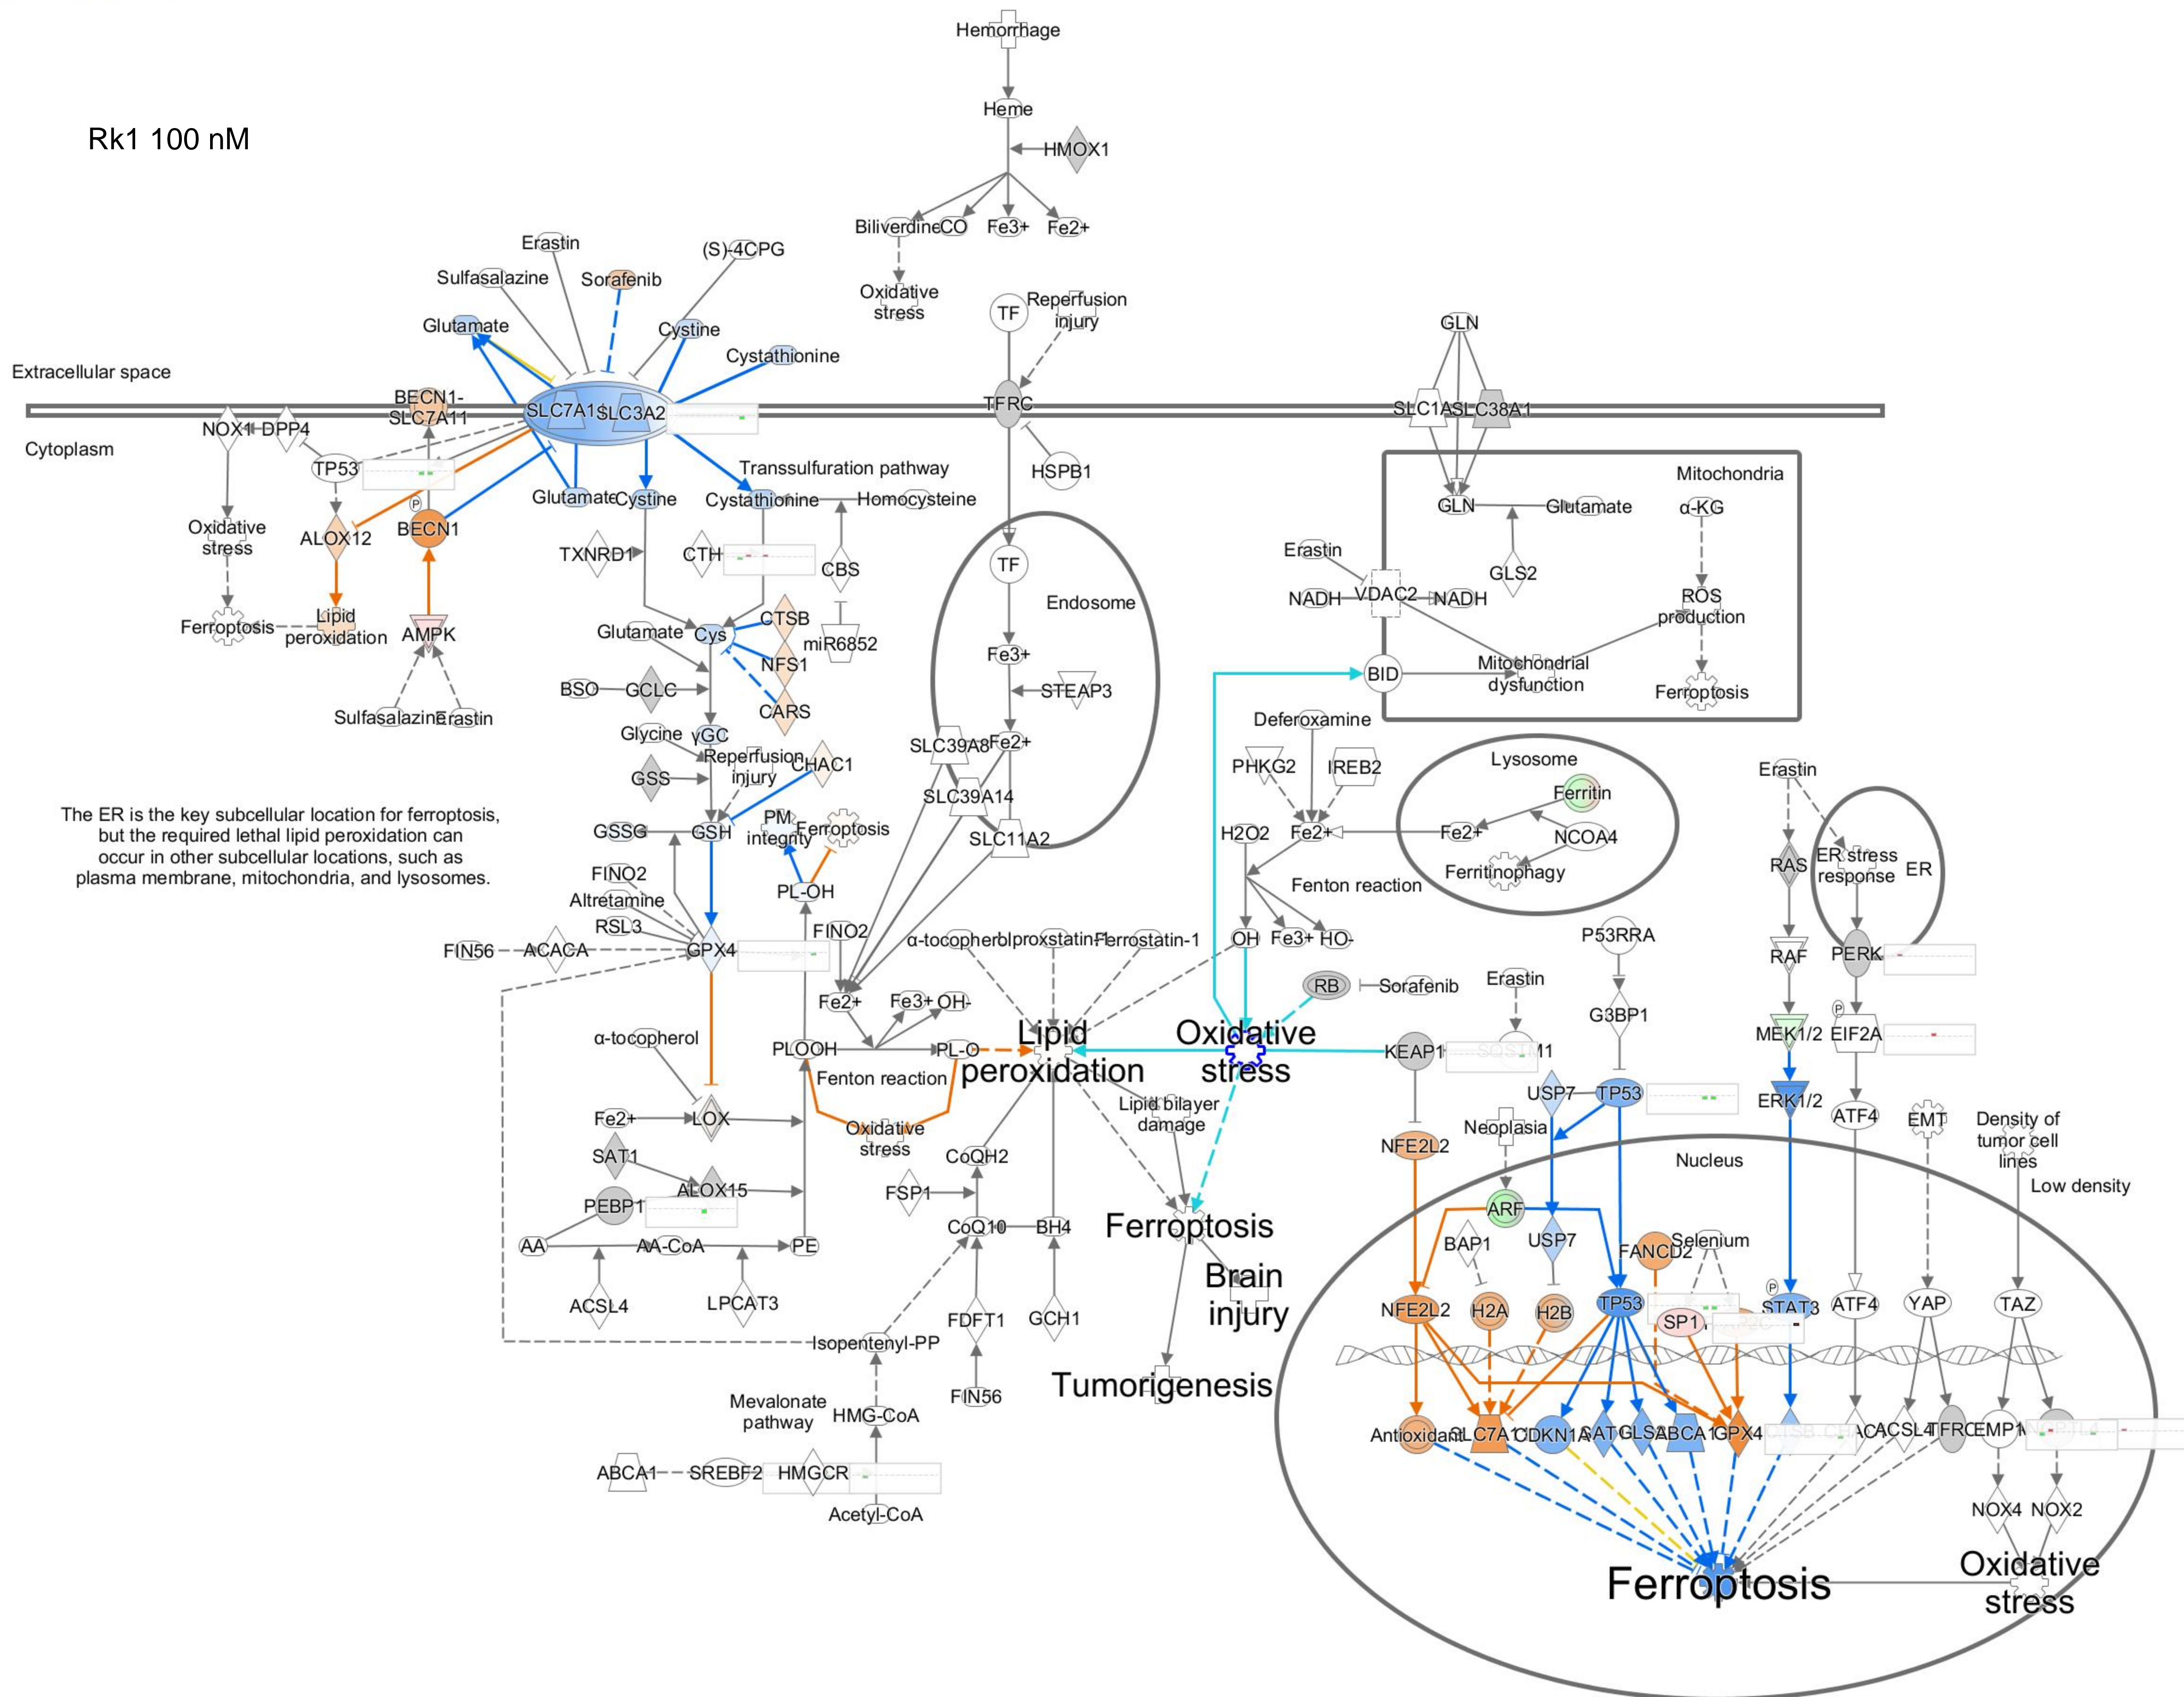

Supplement: Supplementary file 5 [file supplementary]

WG 10000 ng/ml

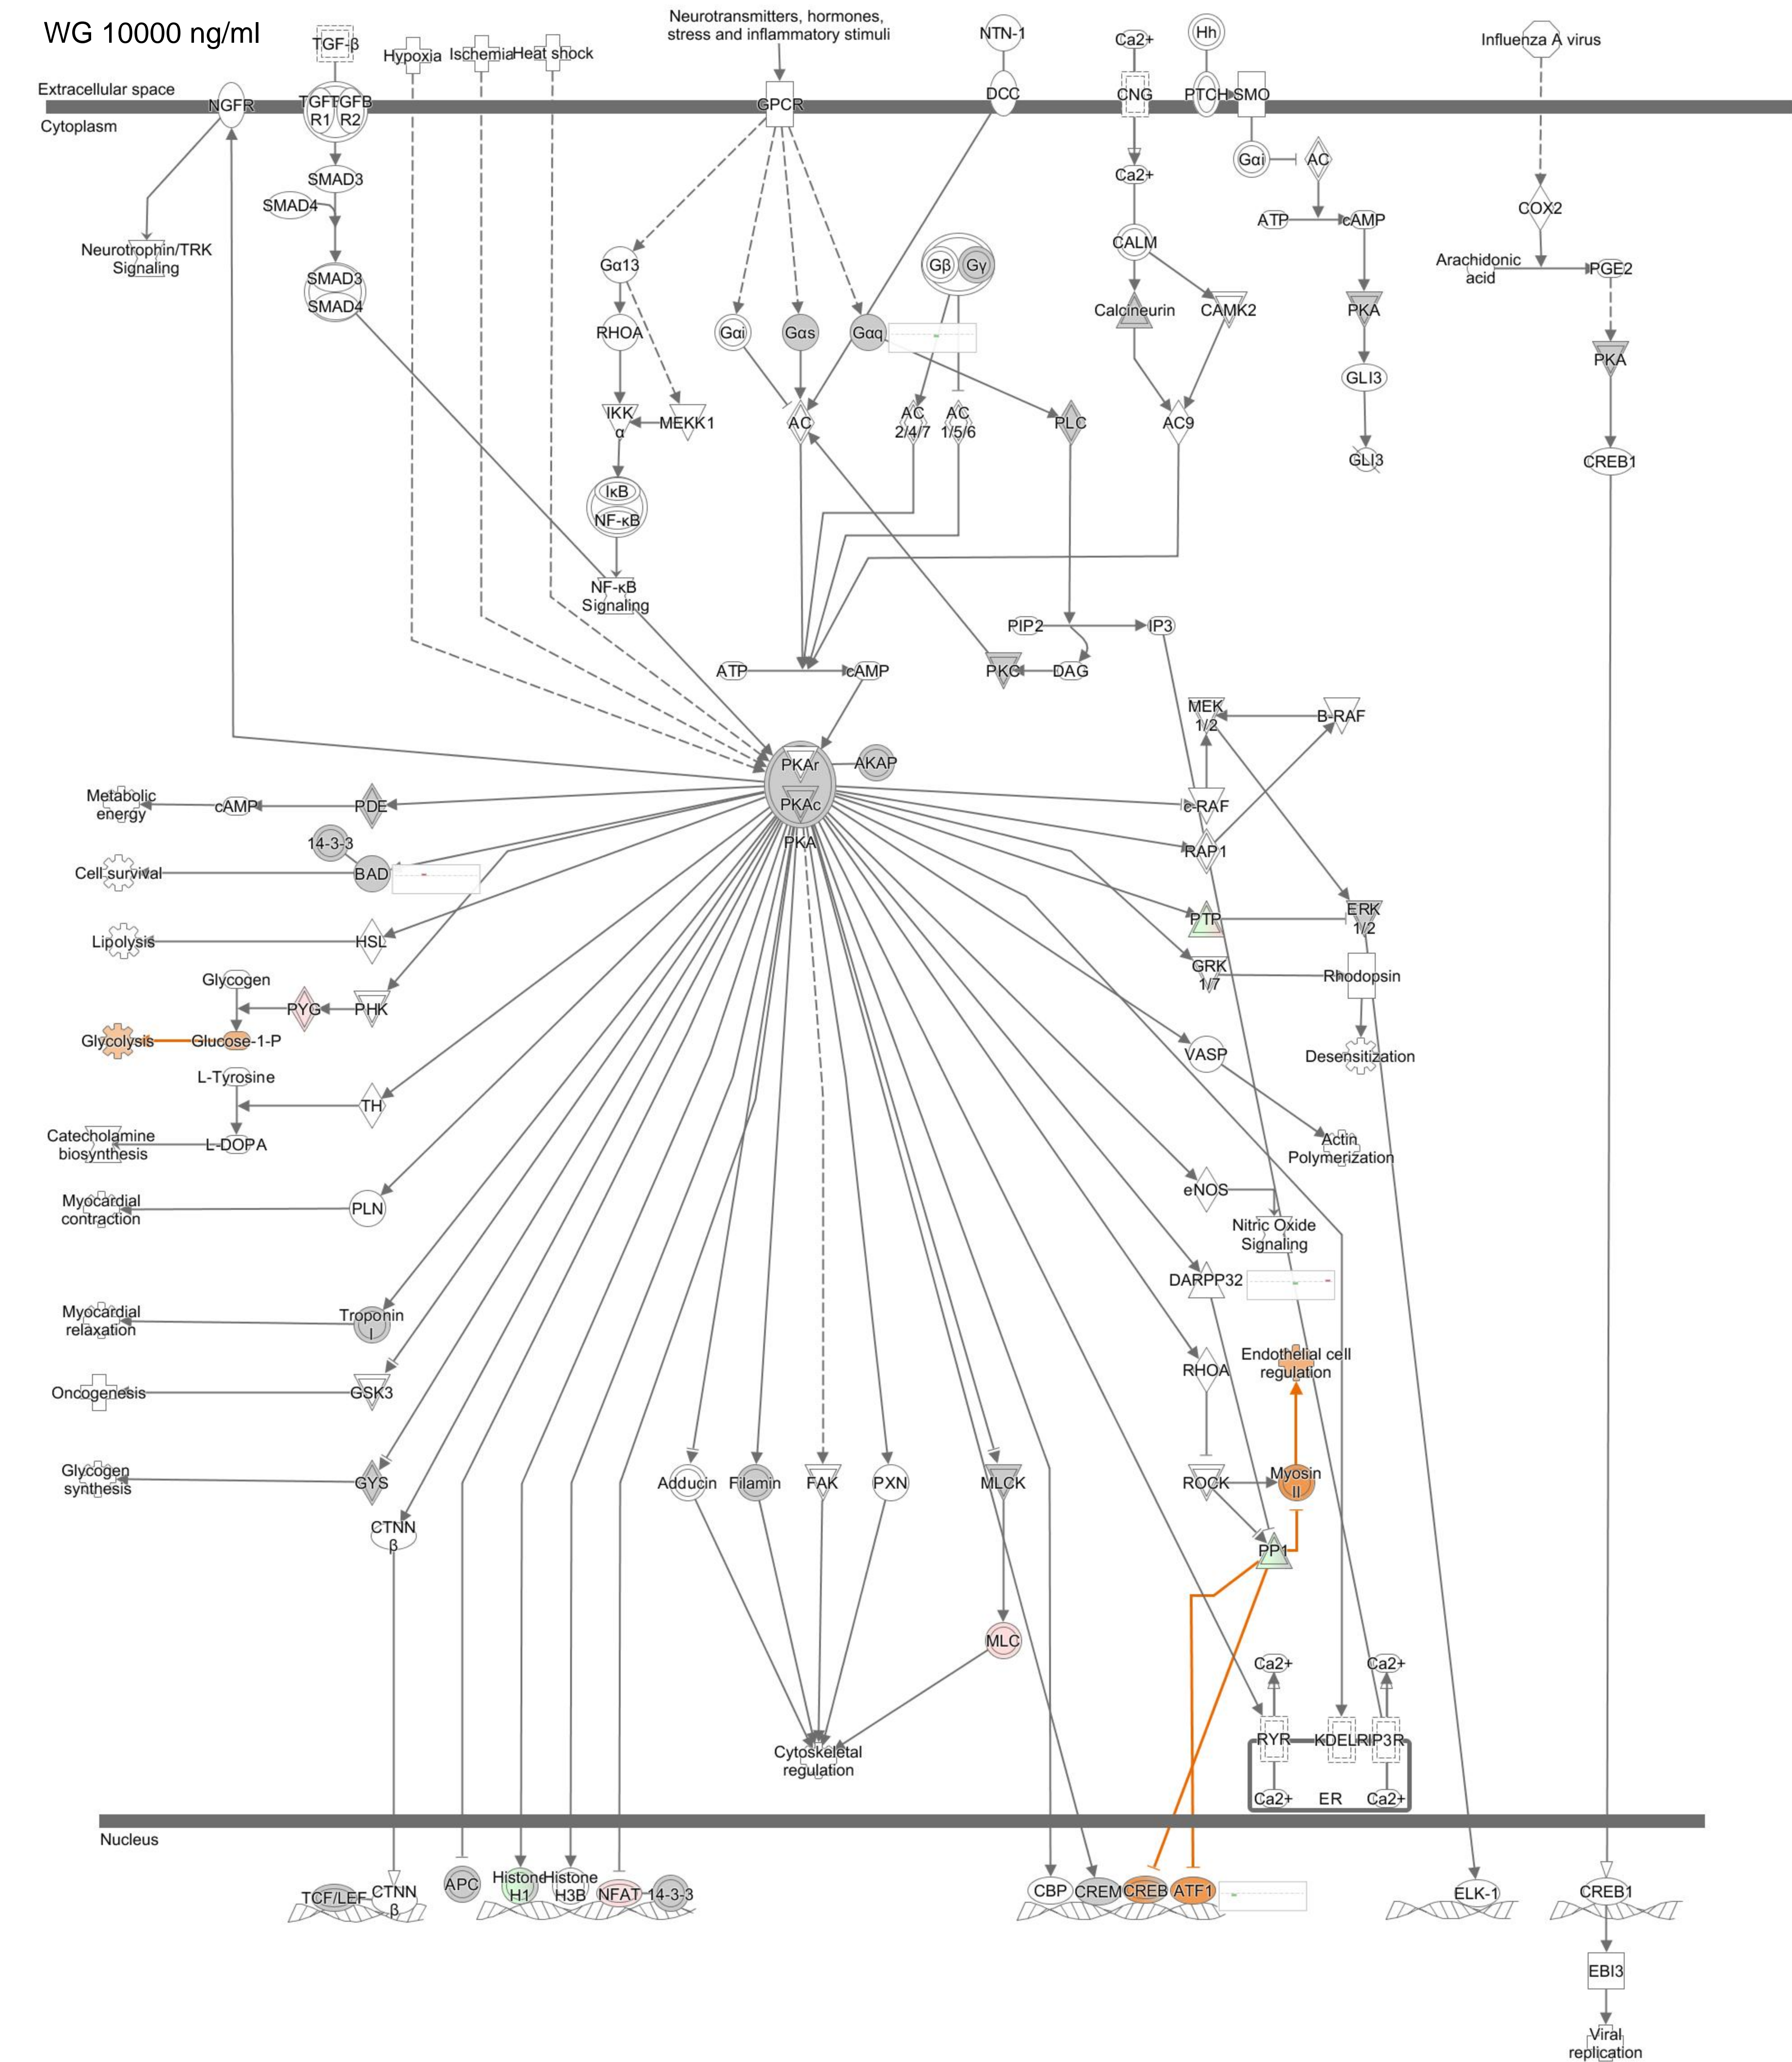



HRG80 10000 ng/ml

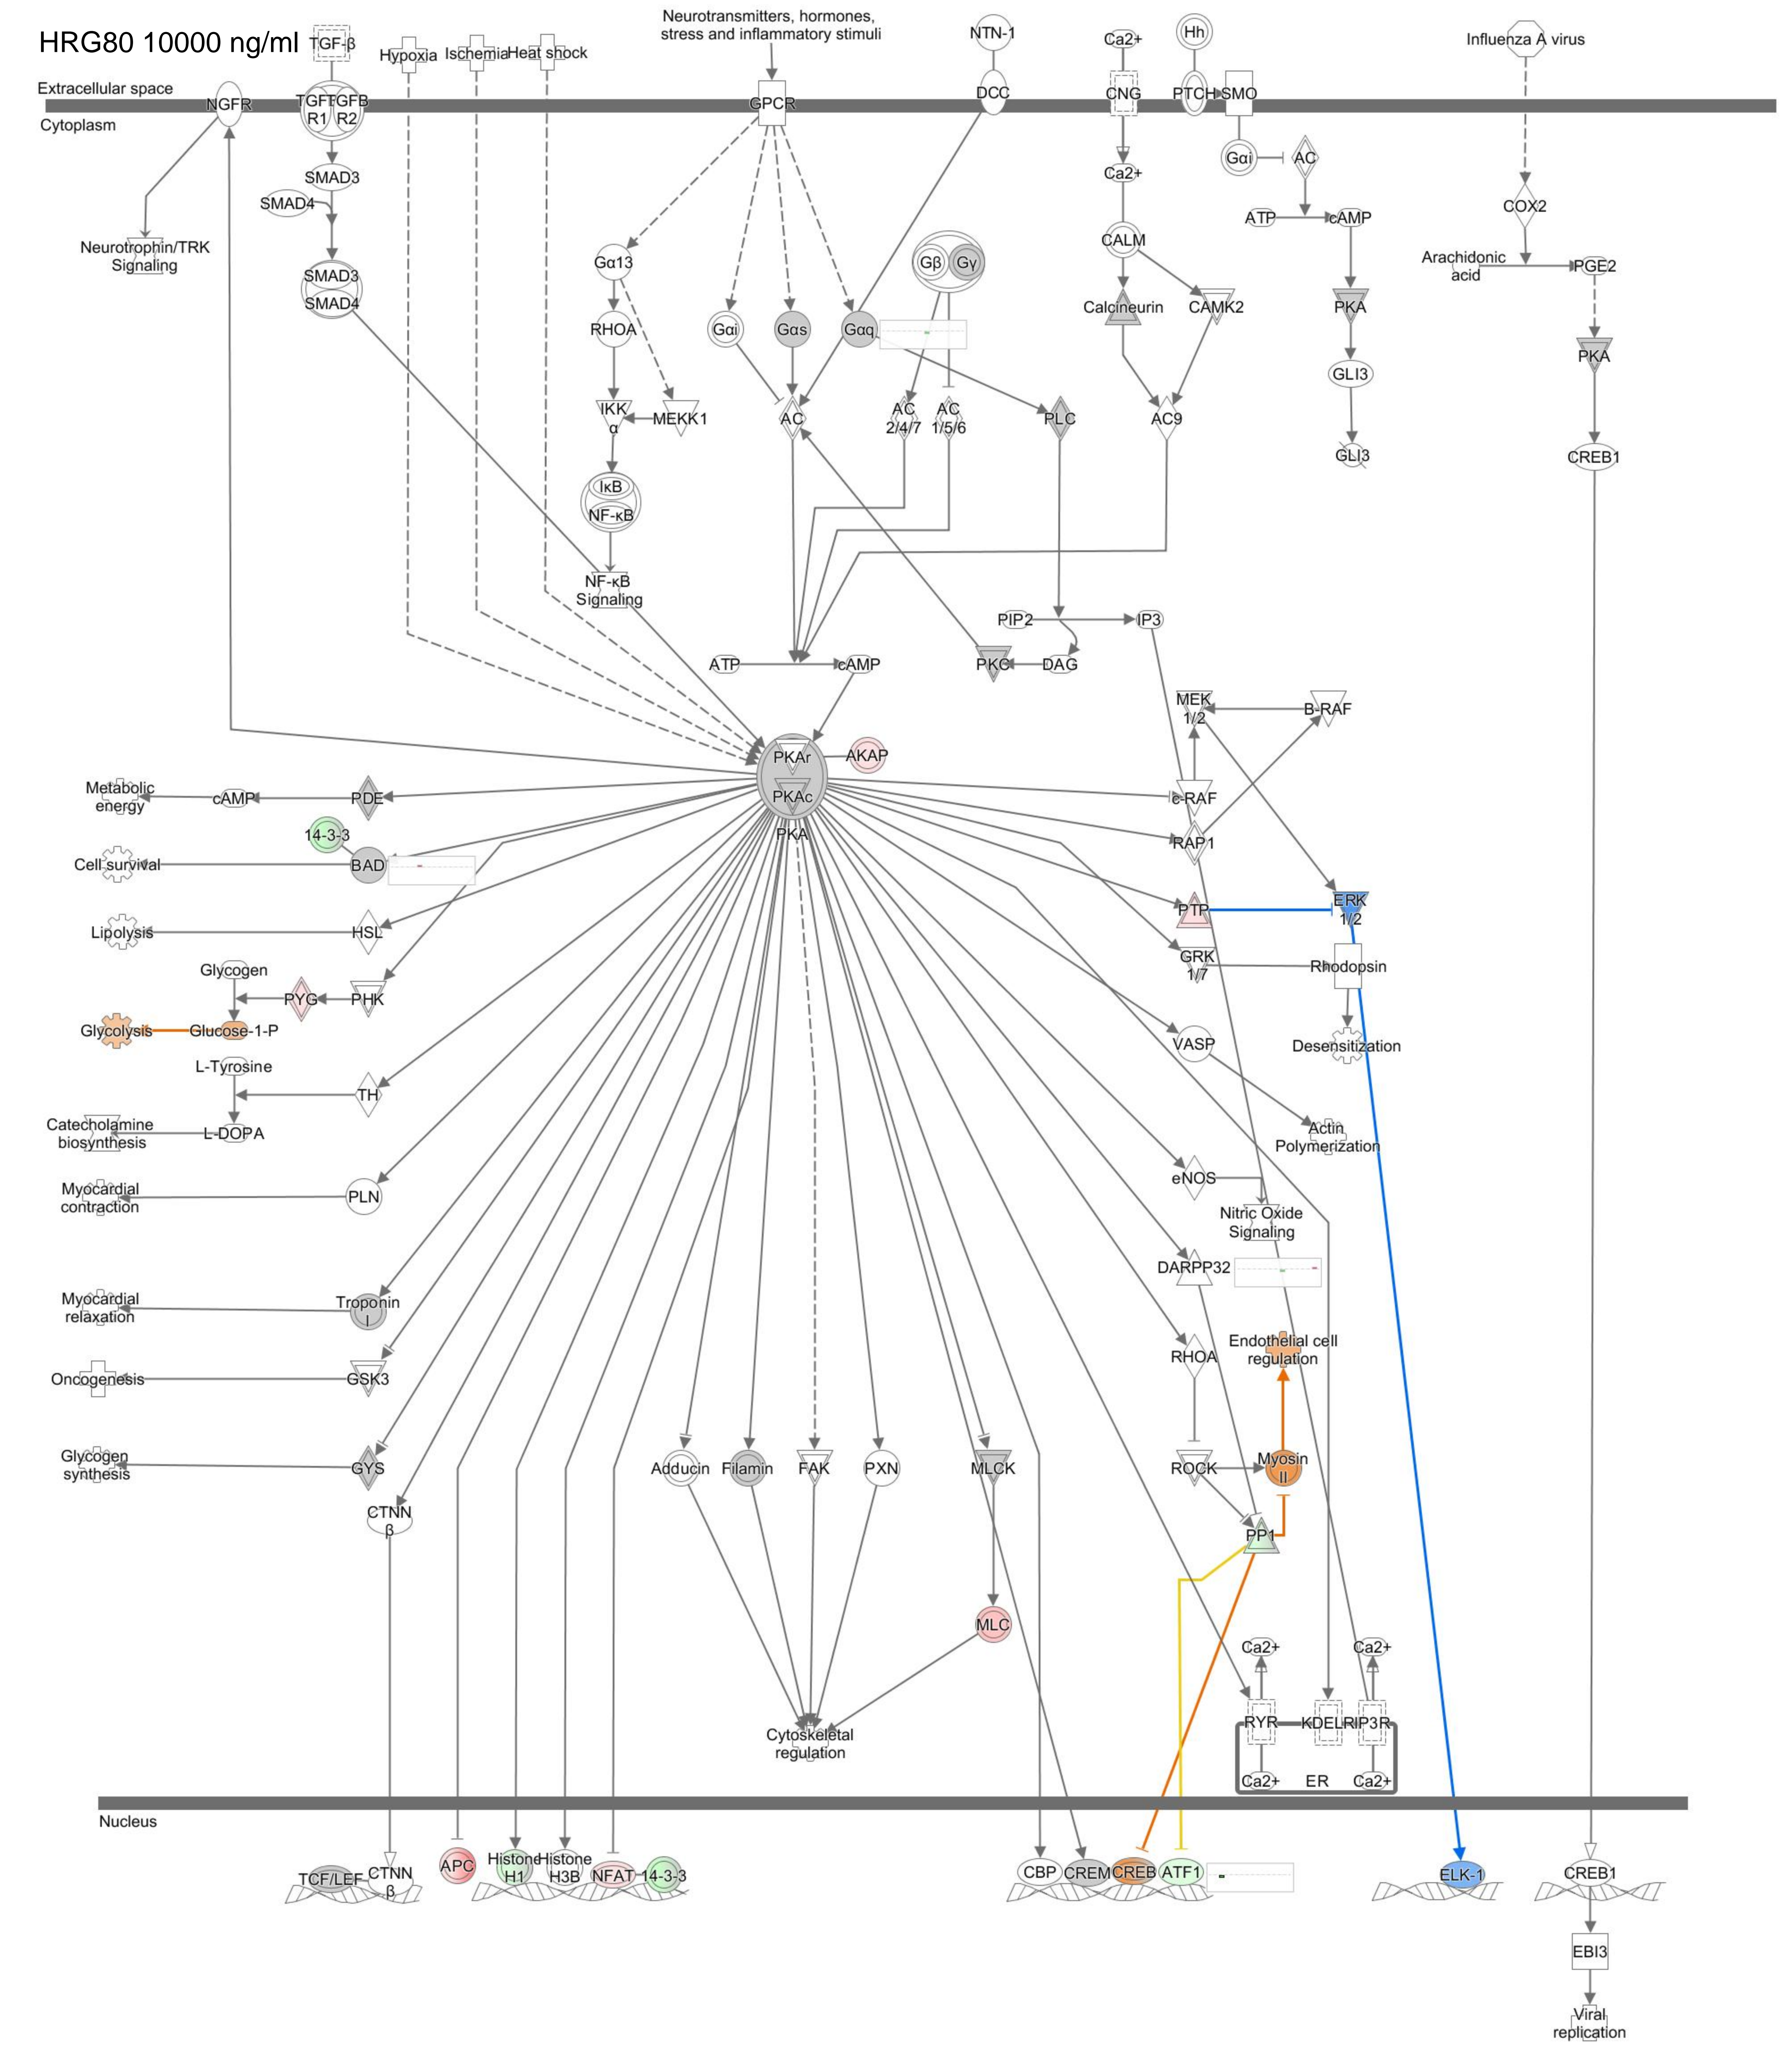



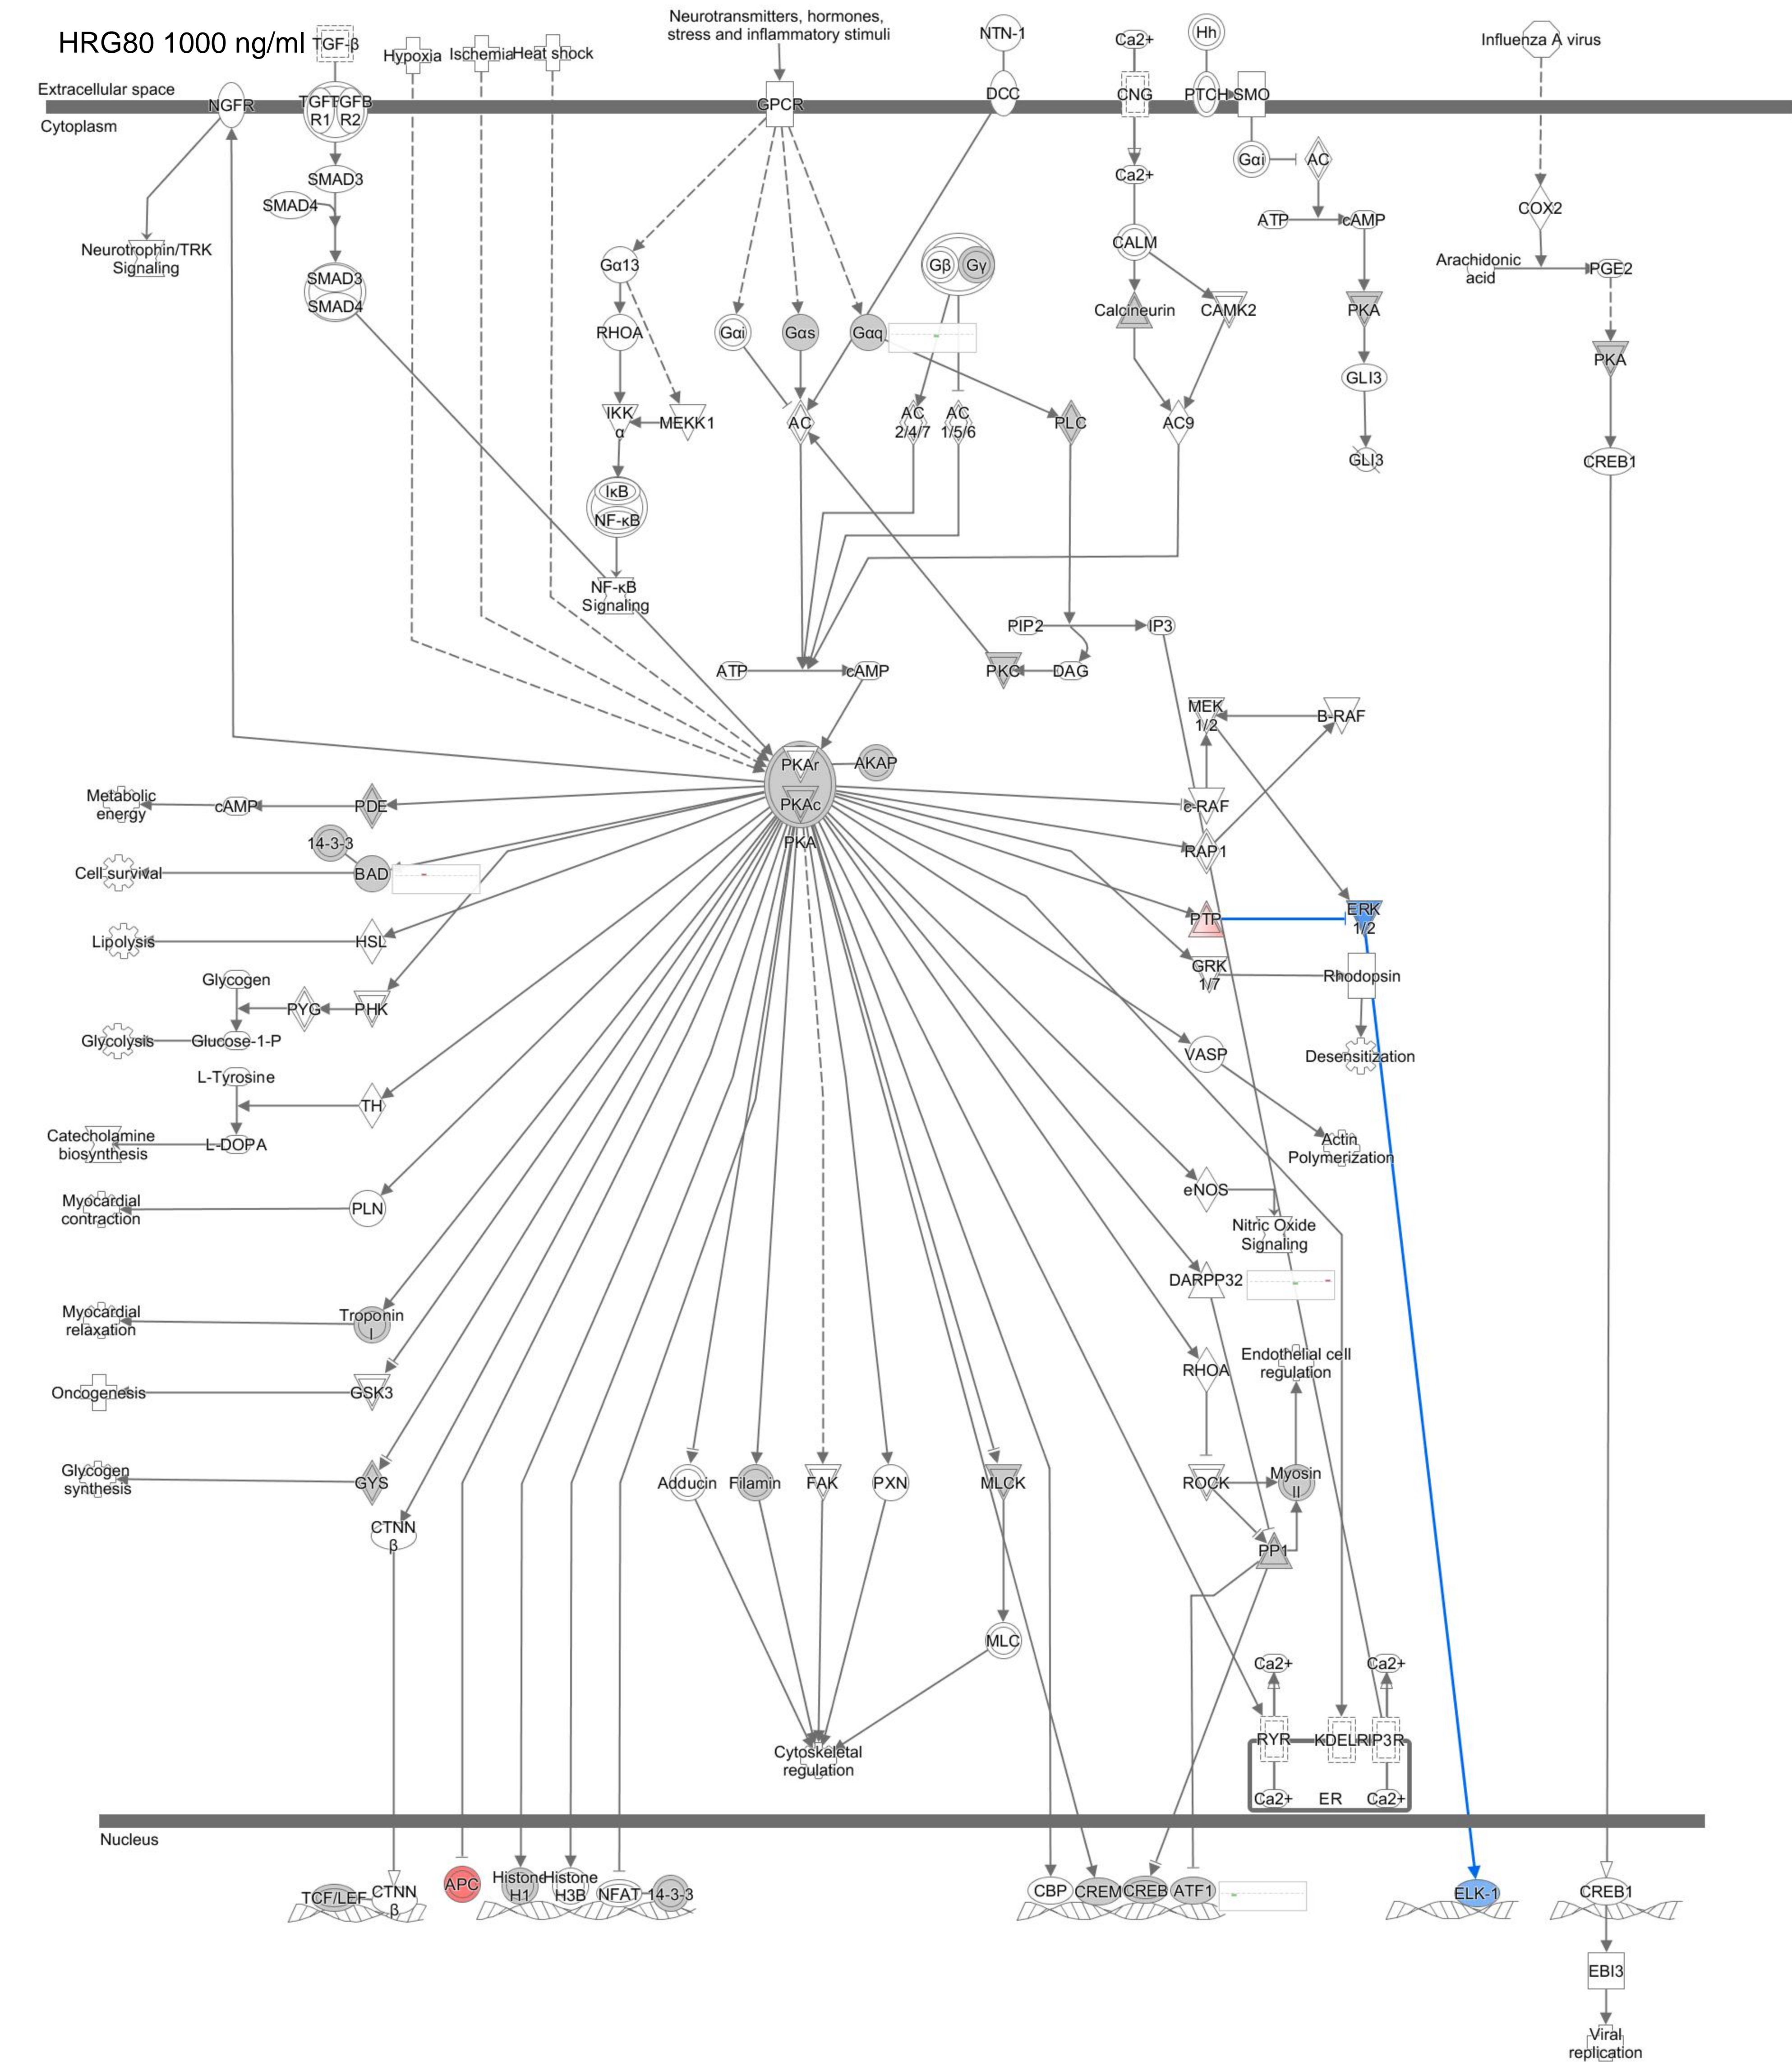



HRG80 100 ng/ml

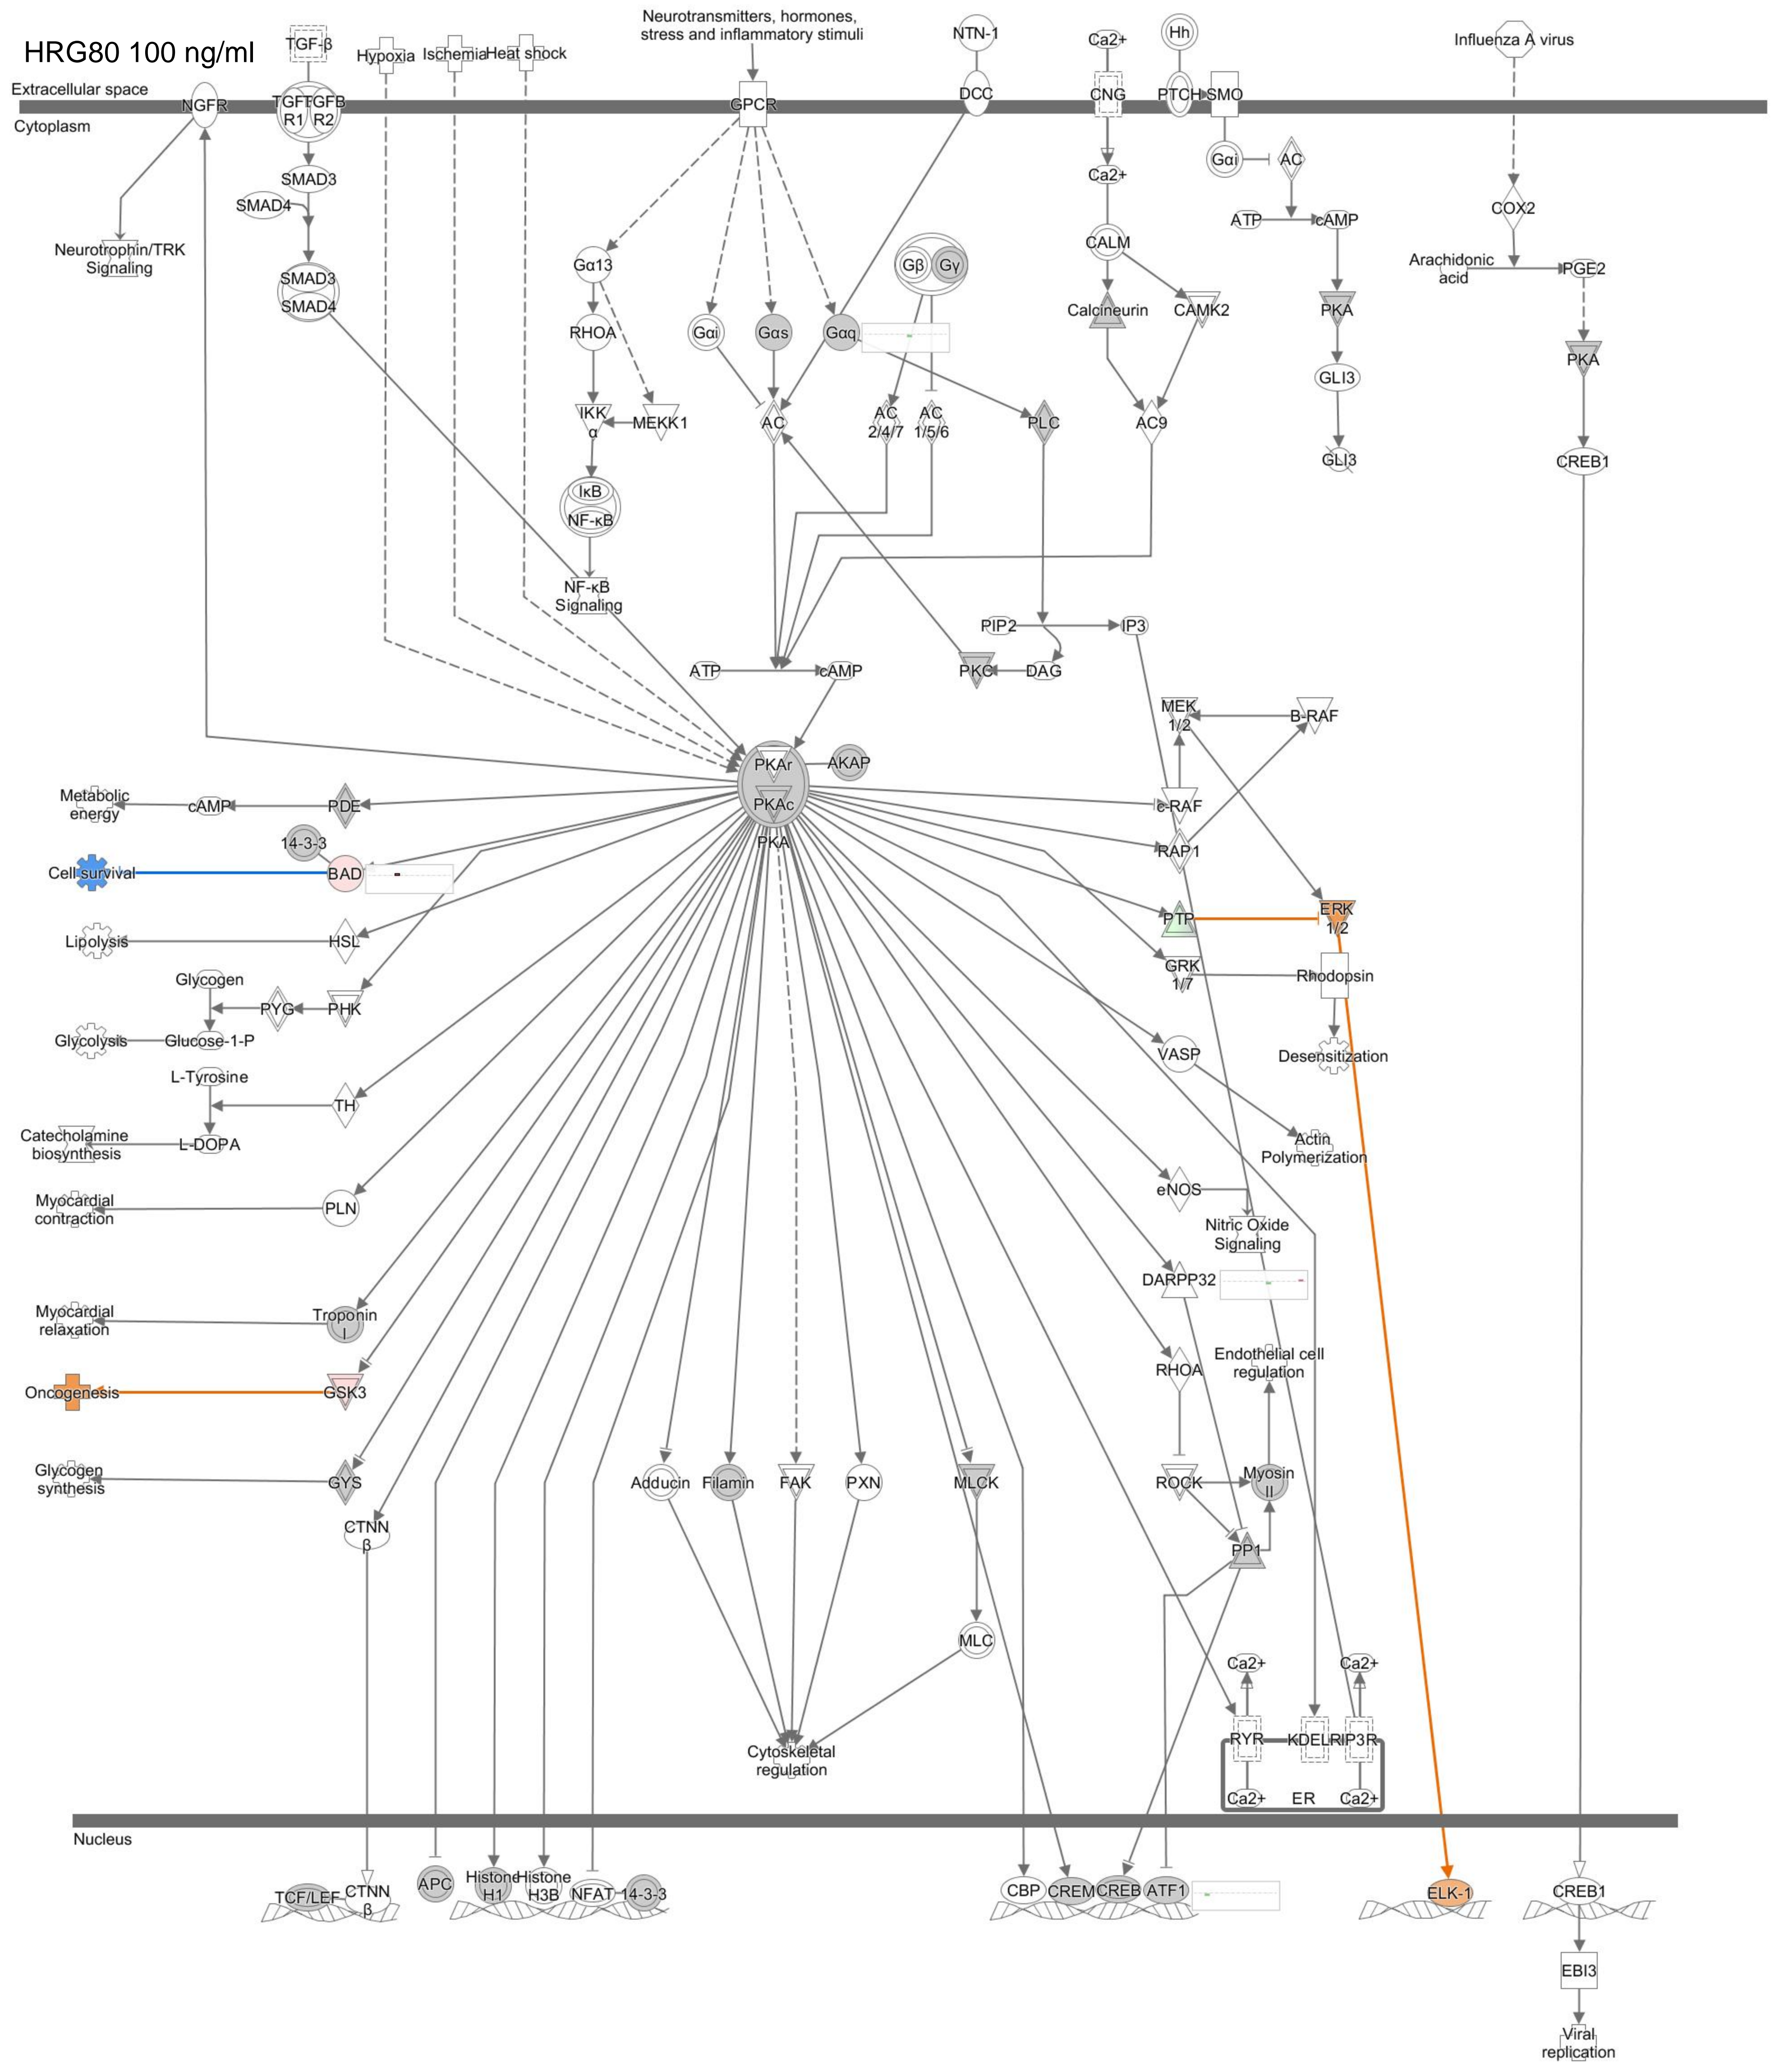



HRG80 100 ng/ml

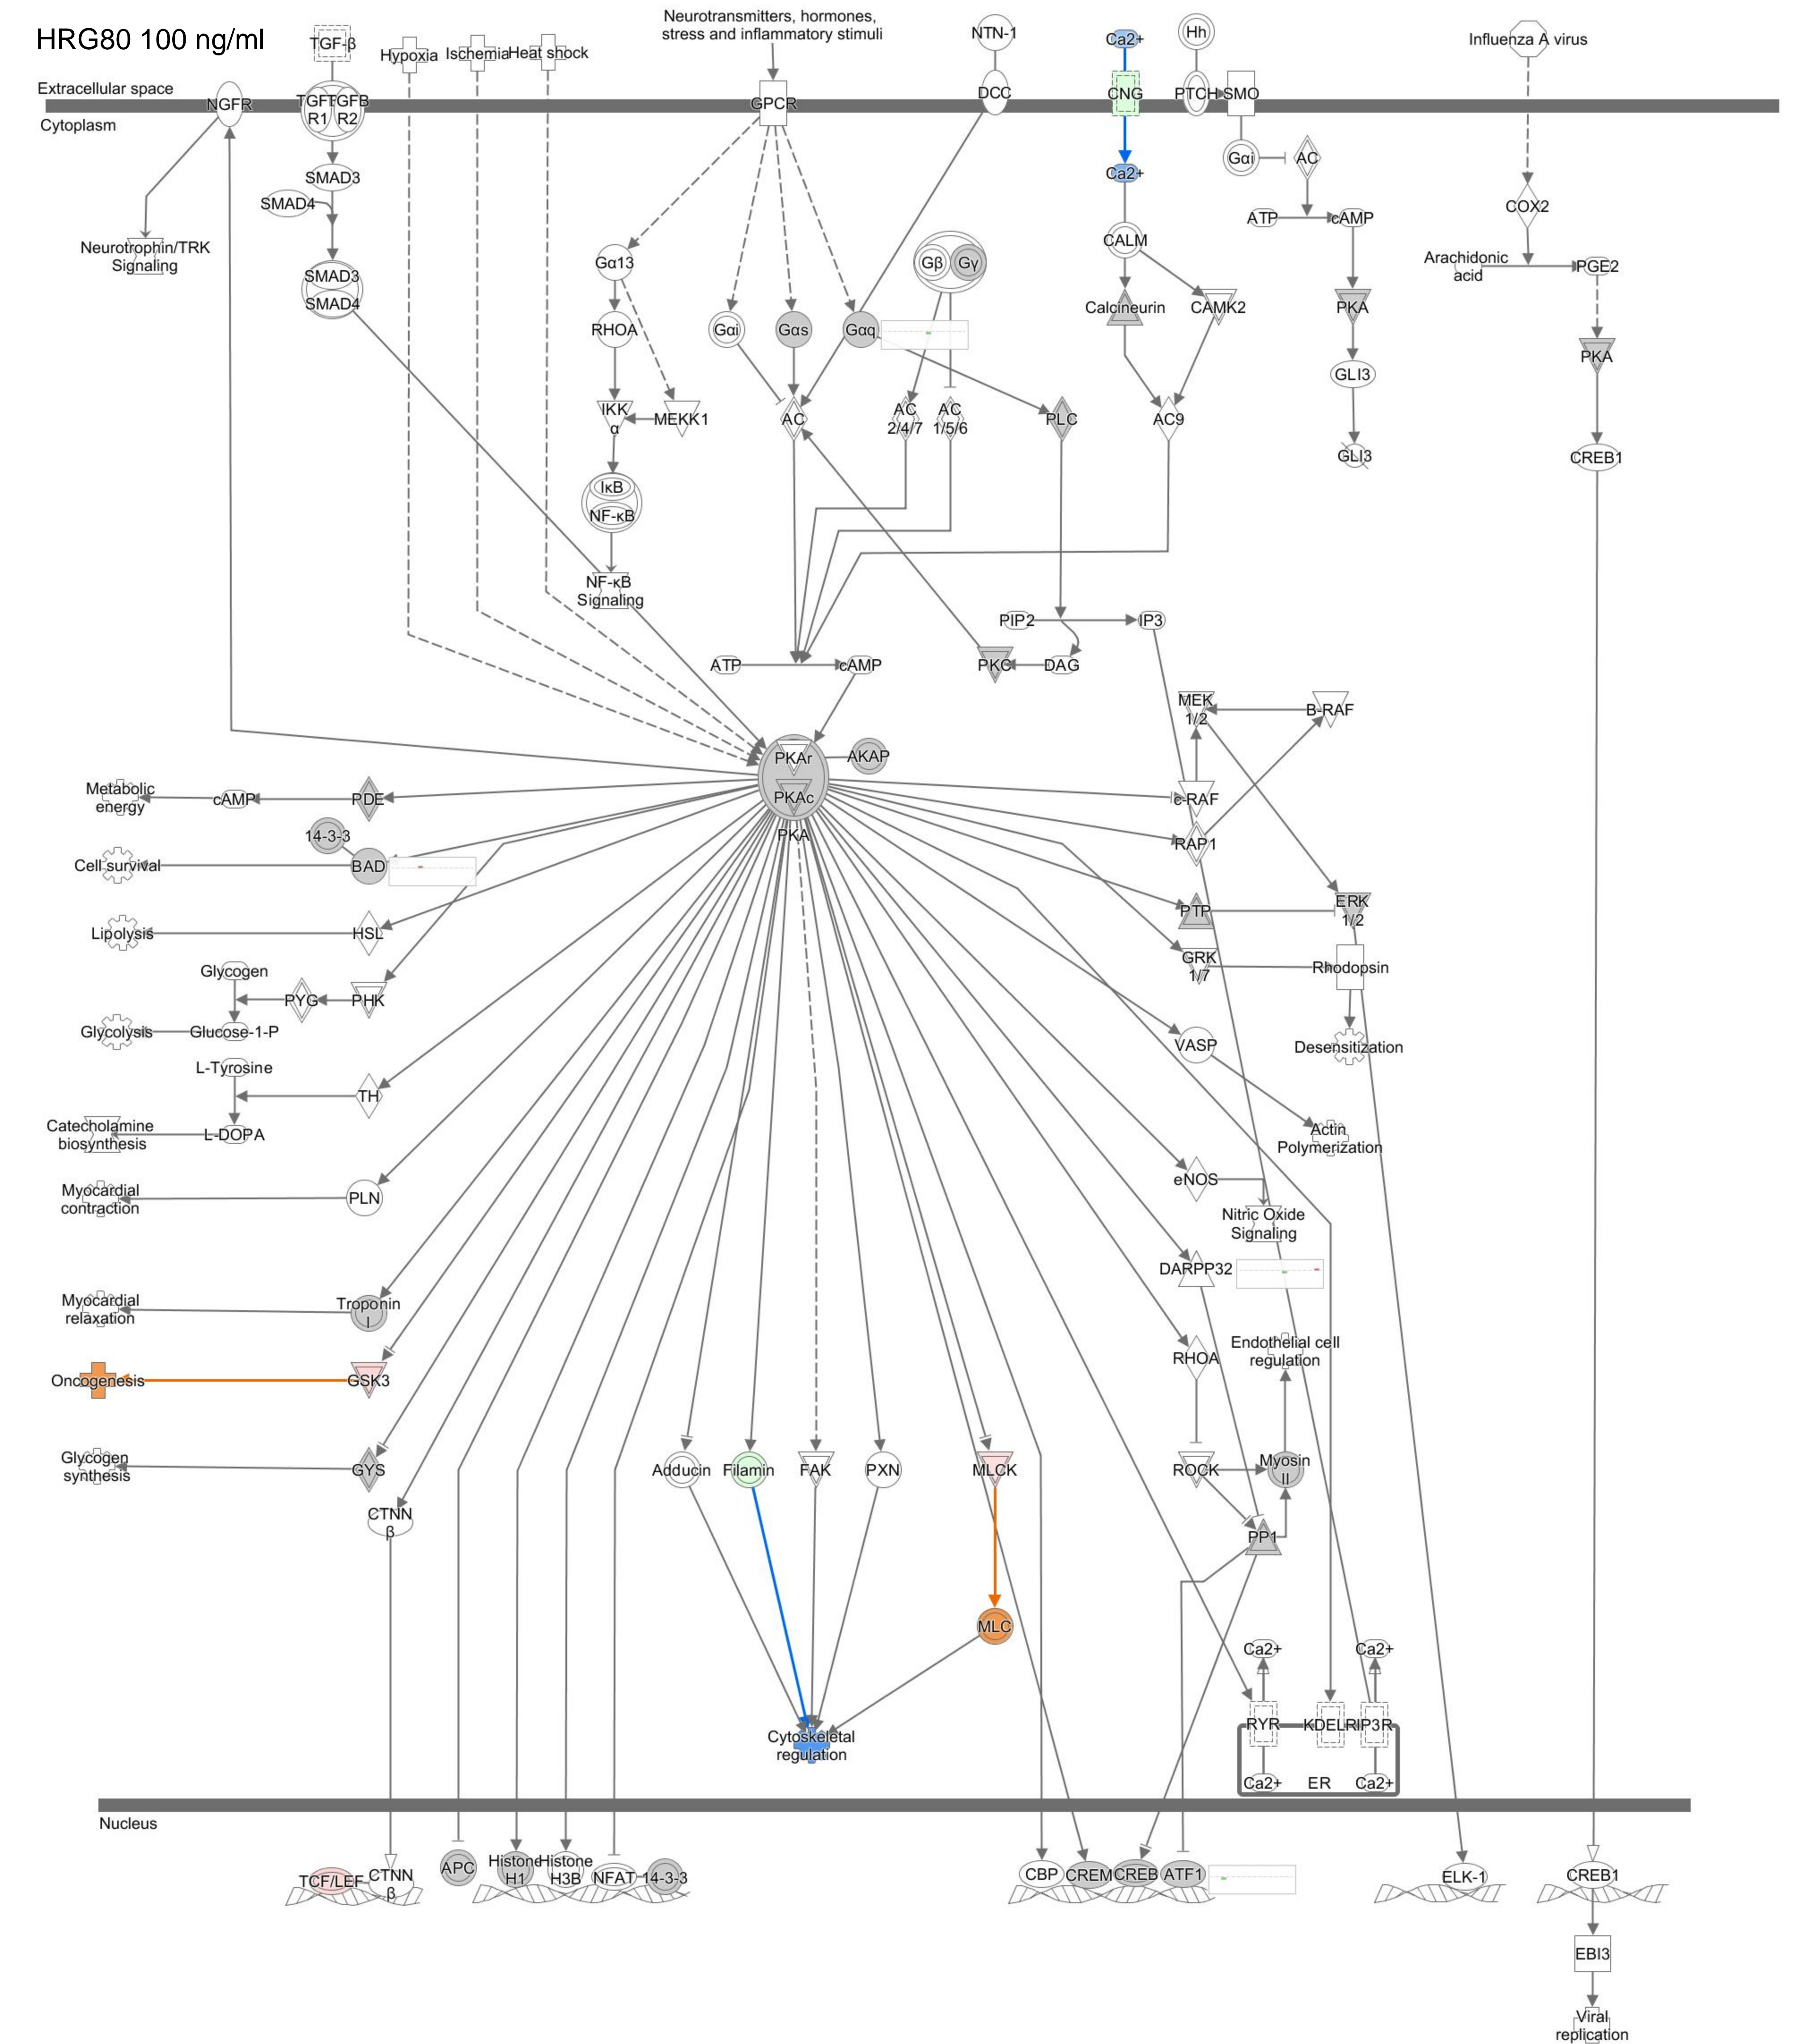



HRG80 0.01 ng/ml

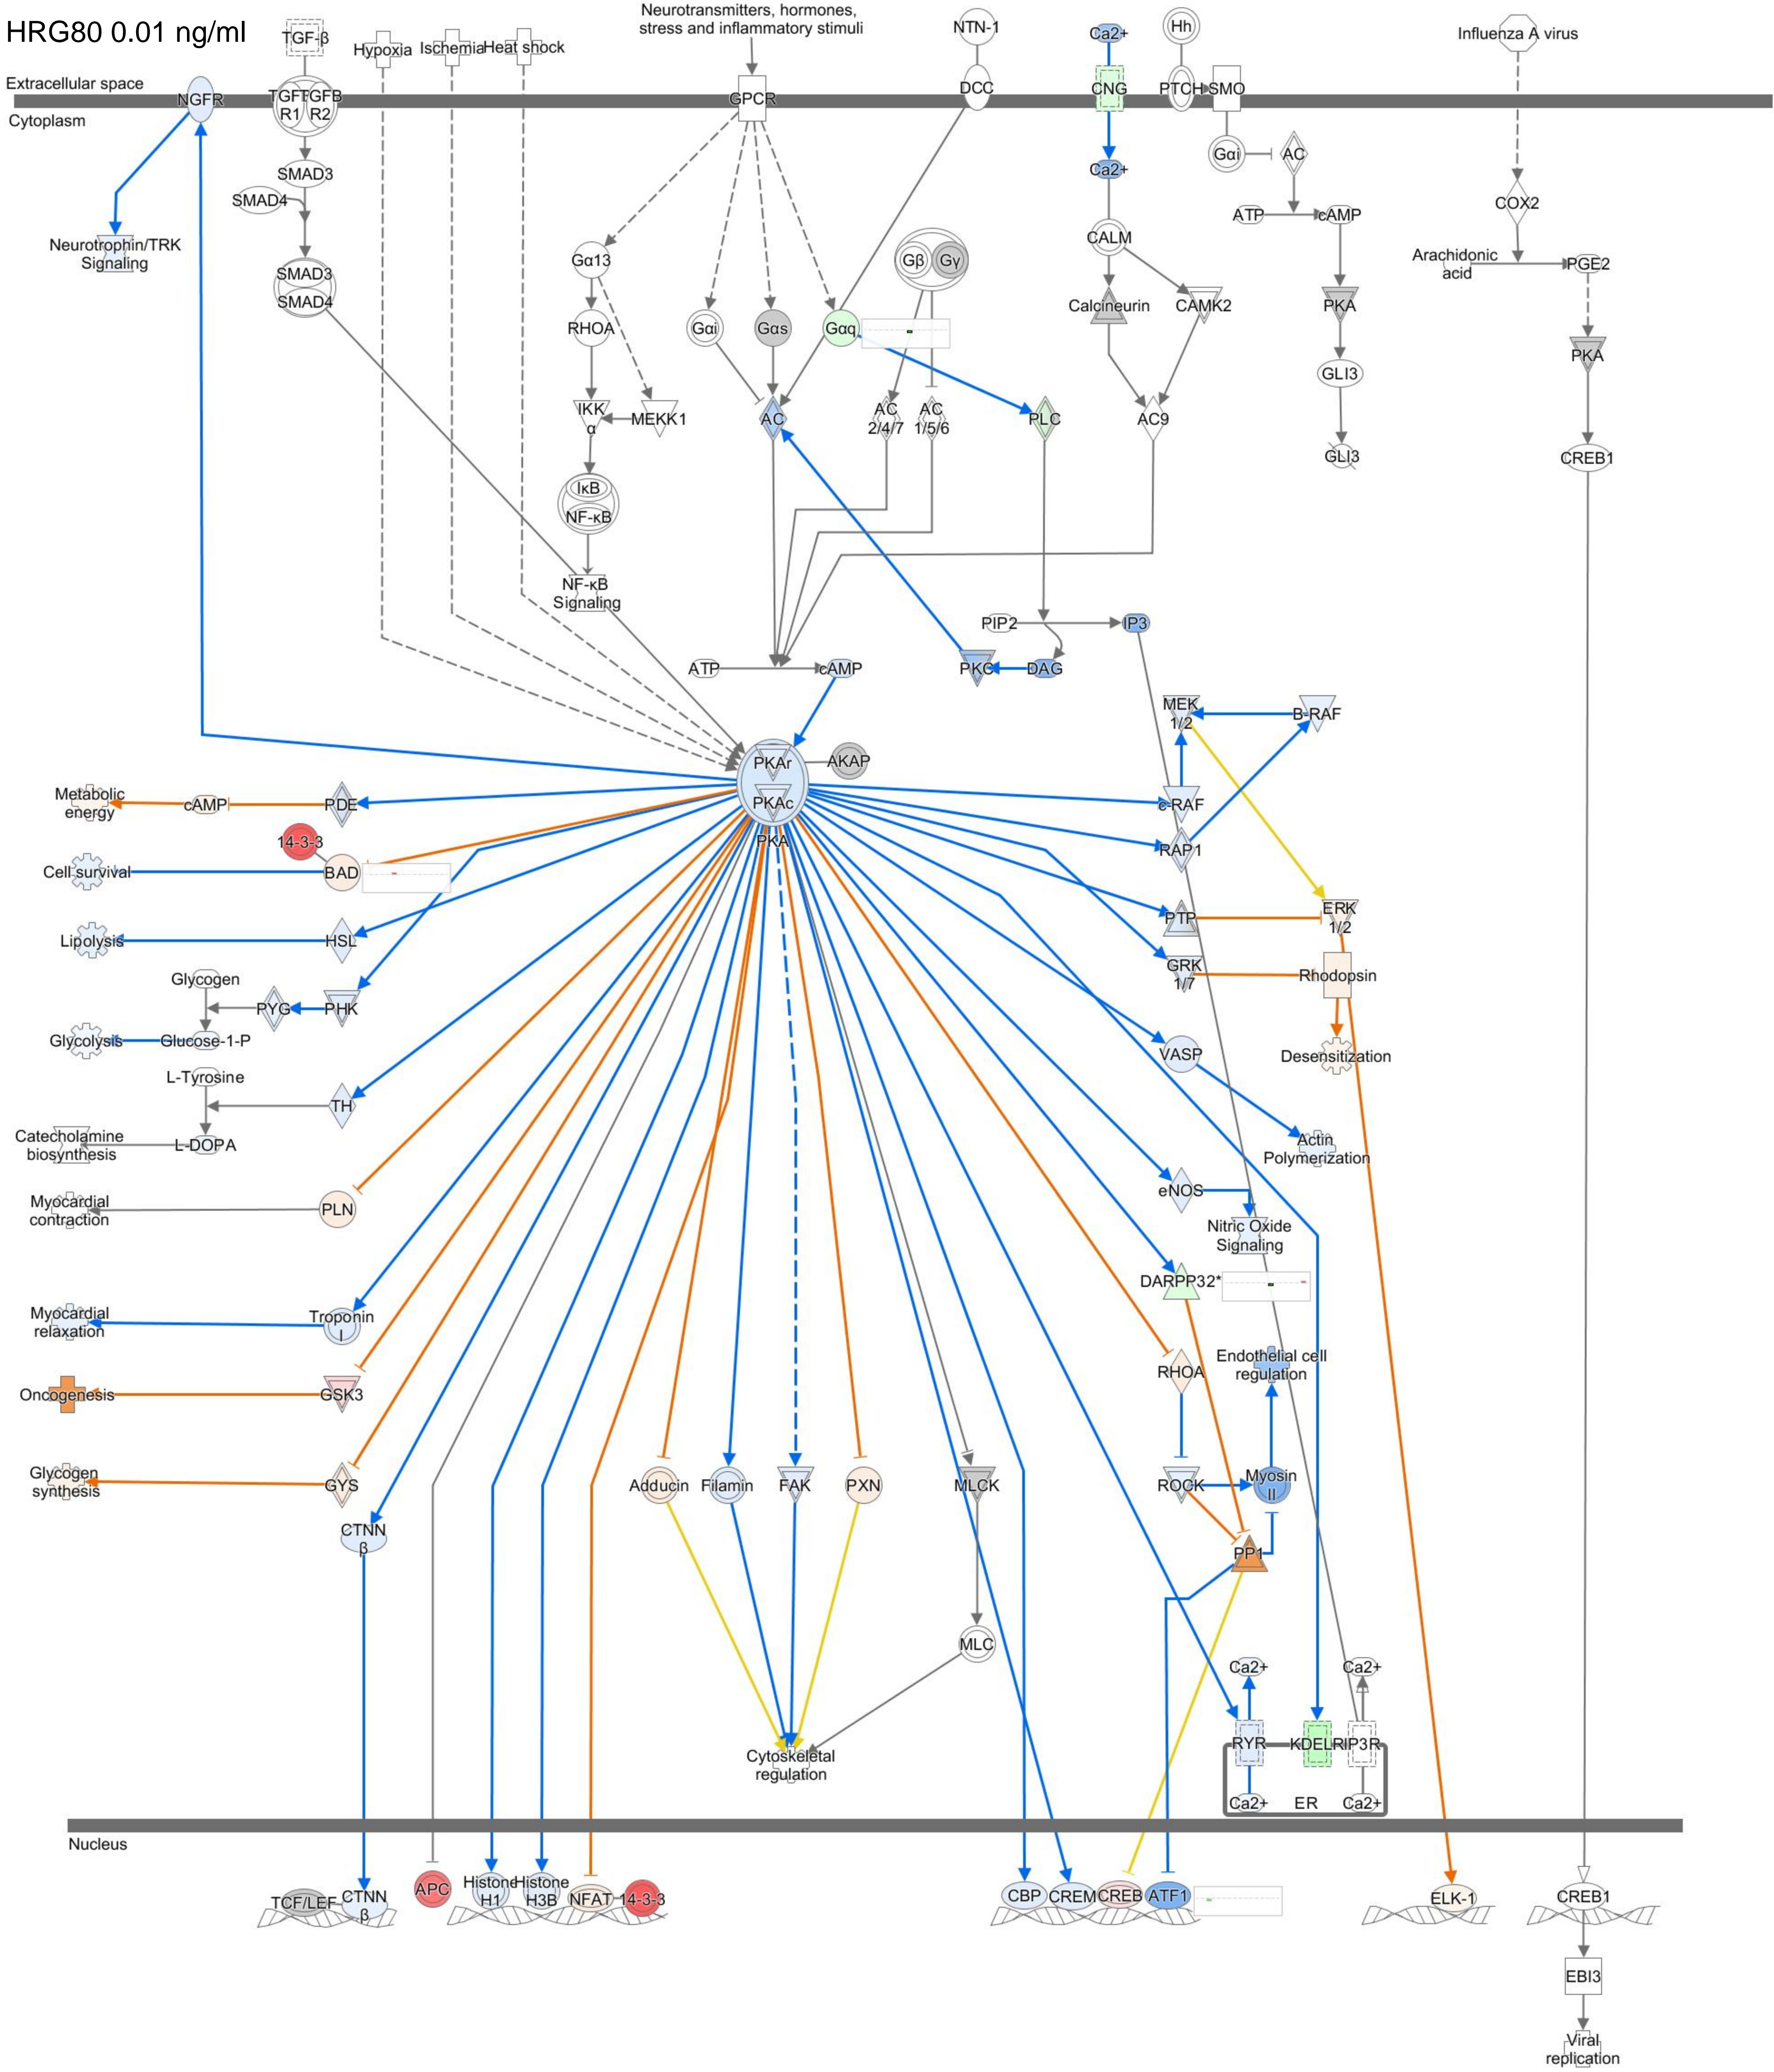



Rb1 100 nM

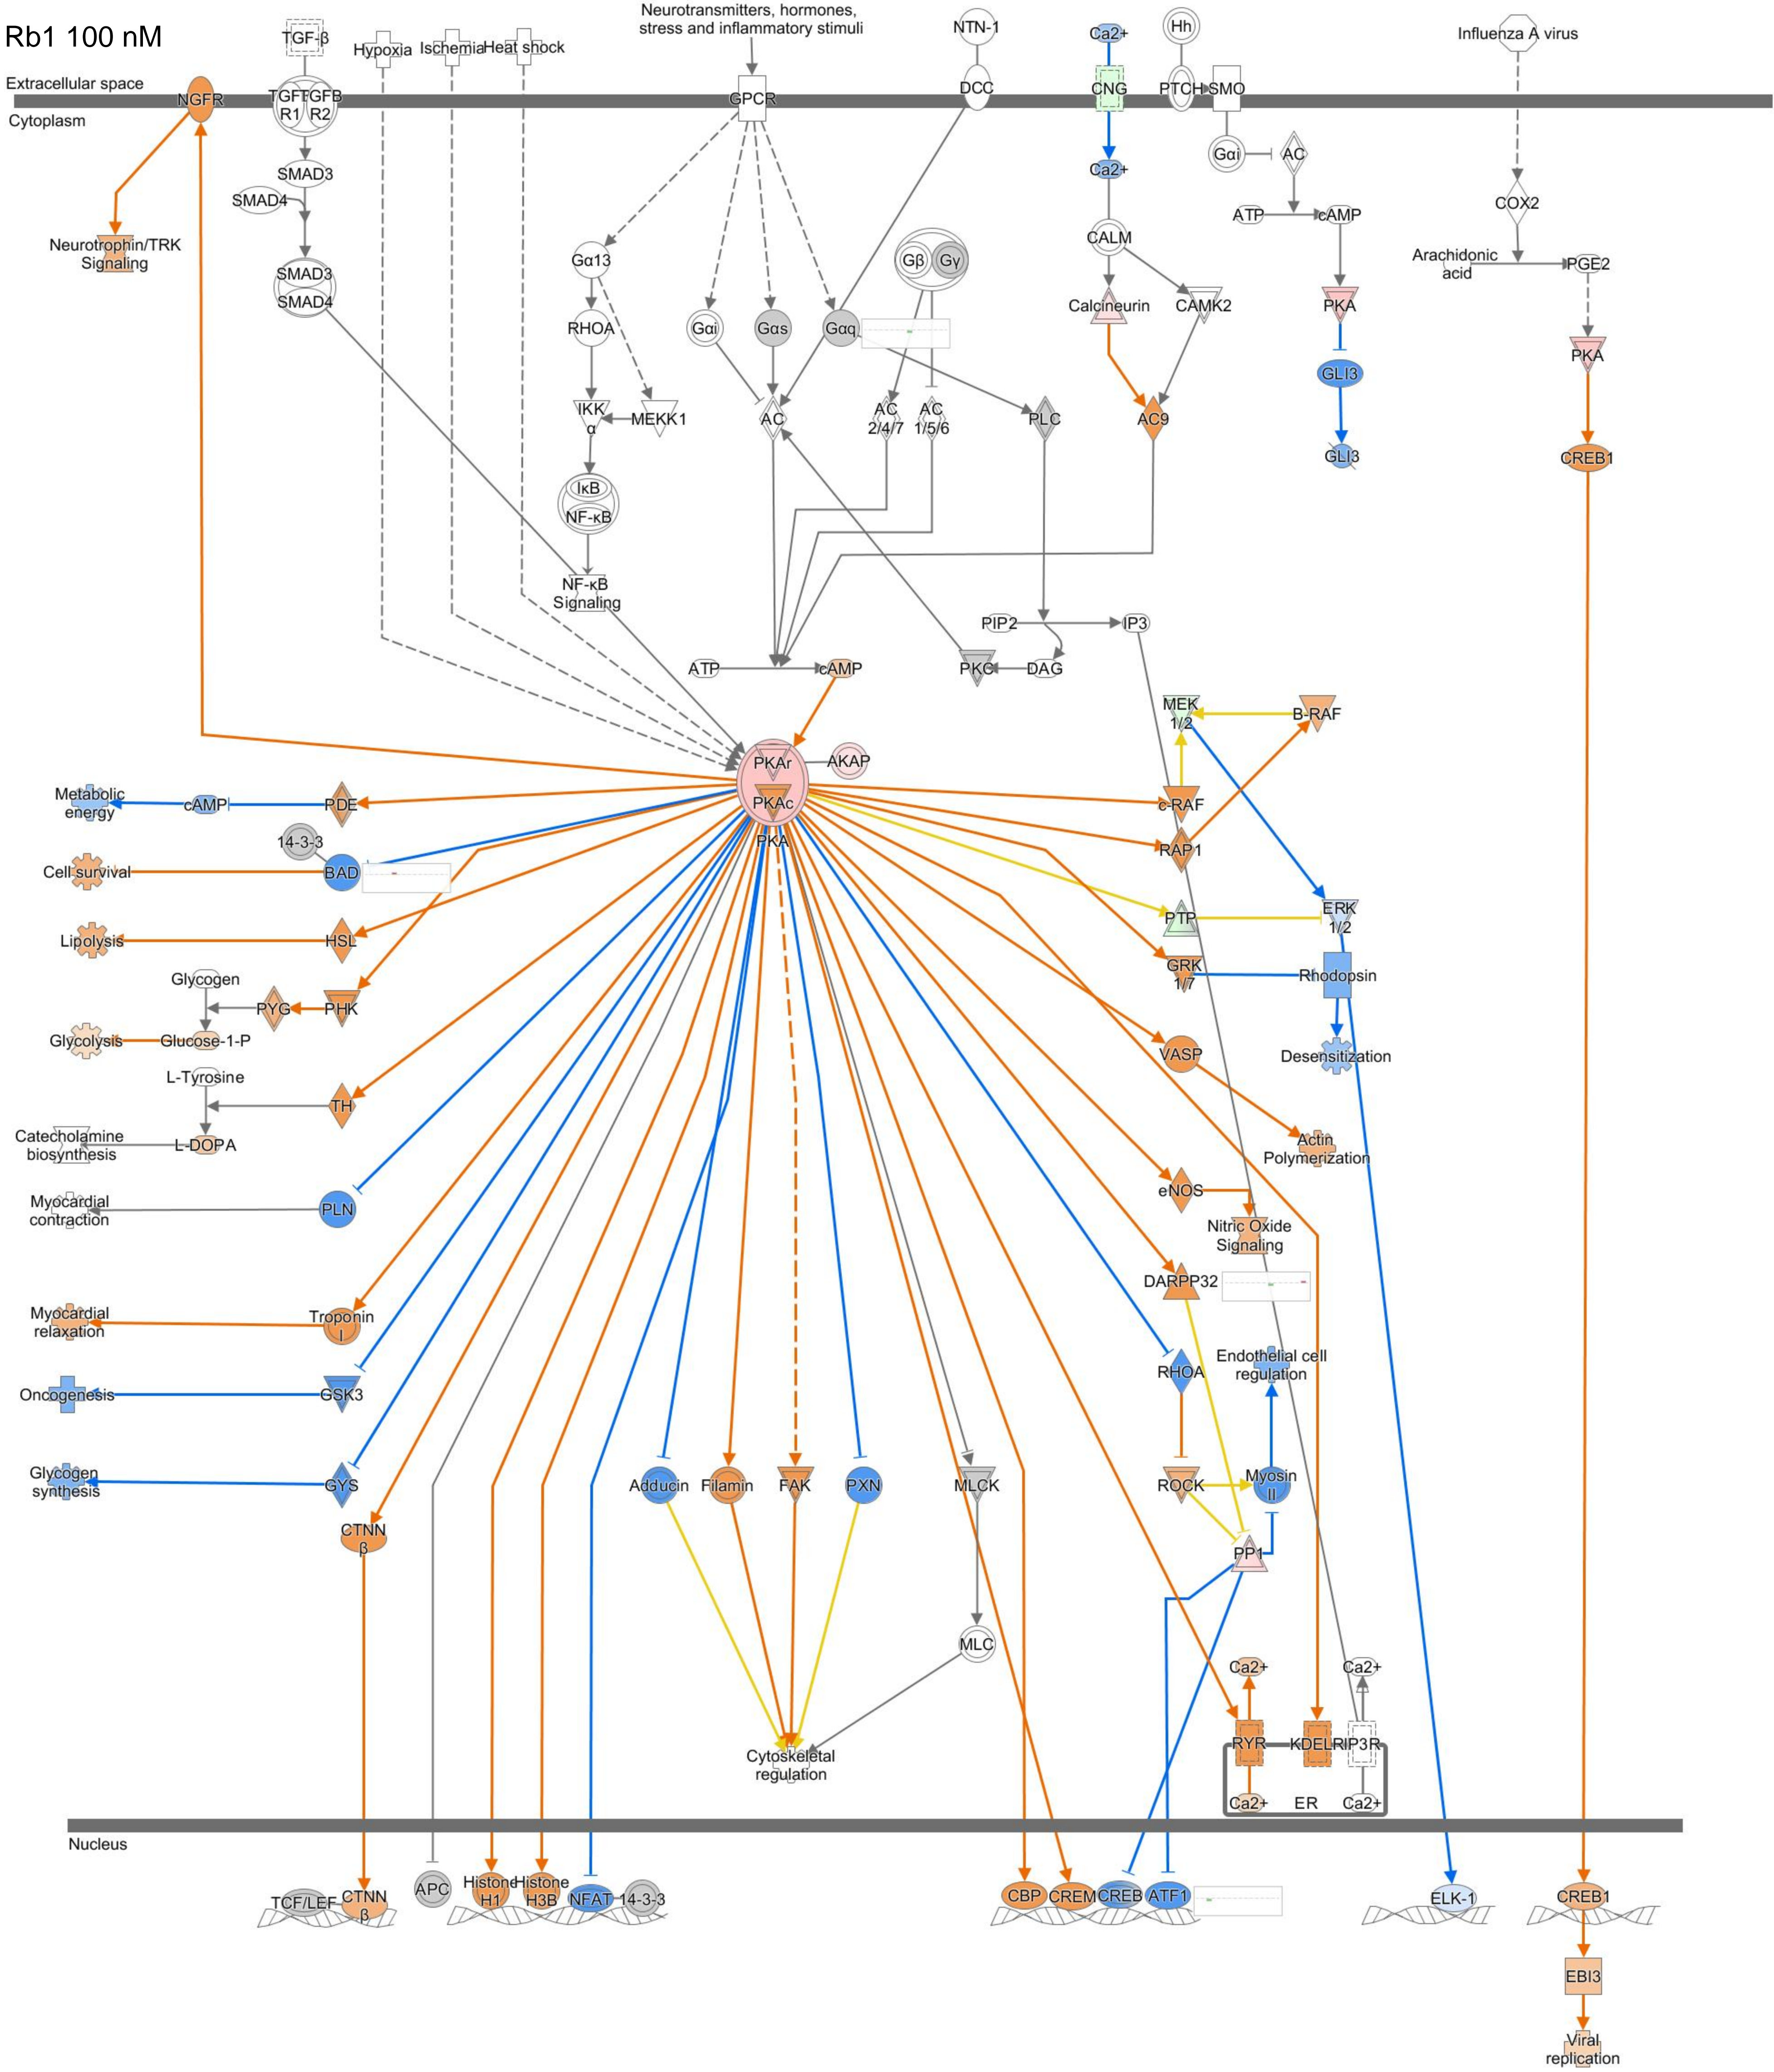



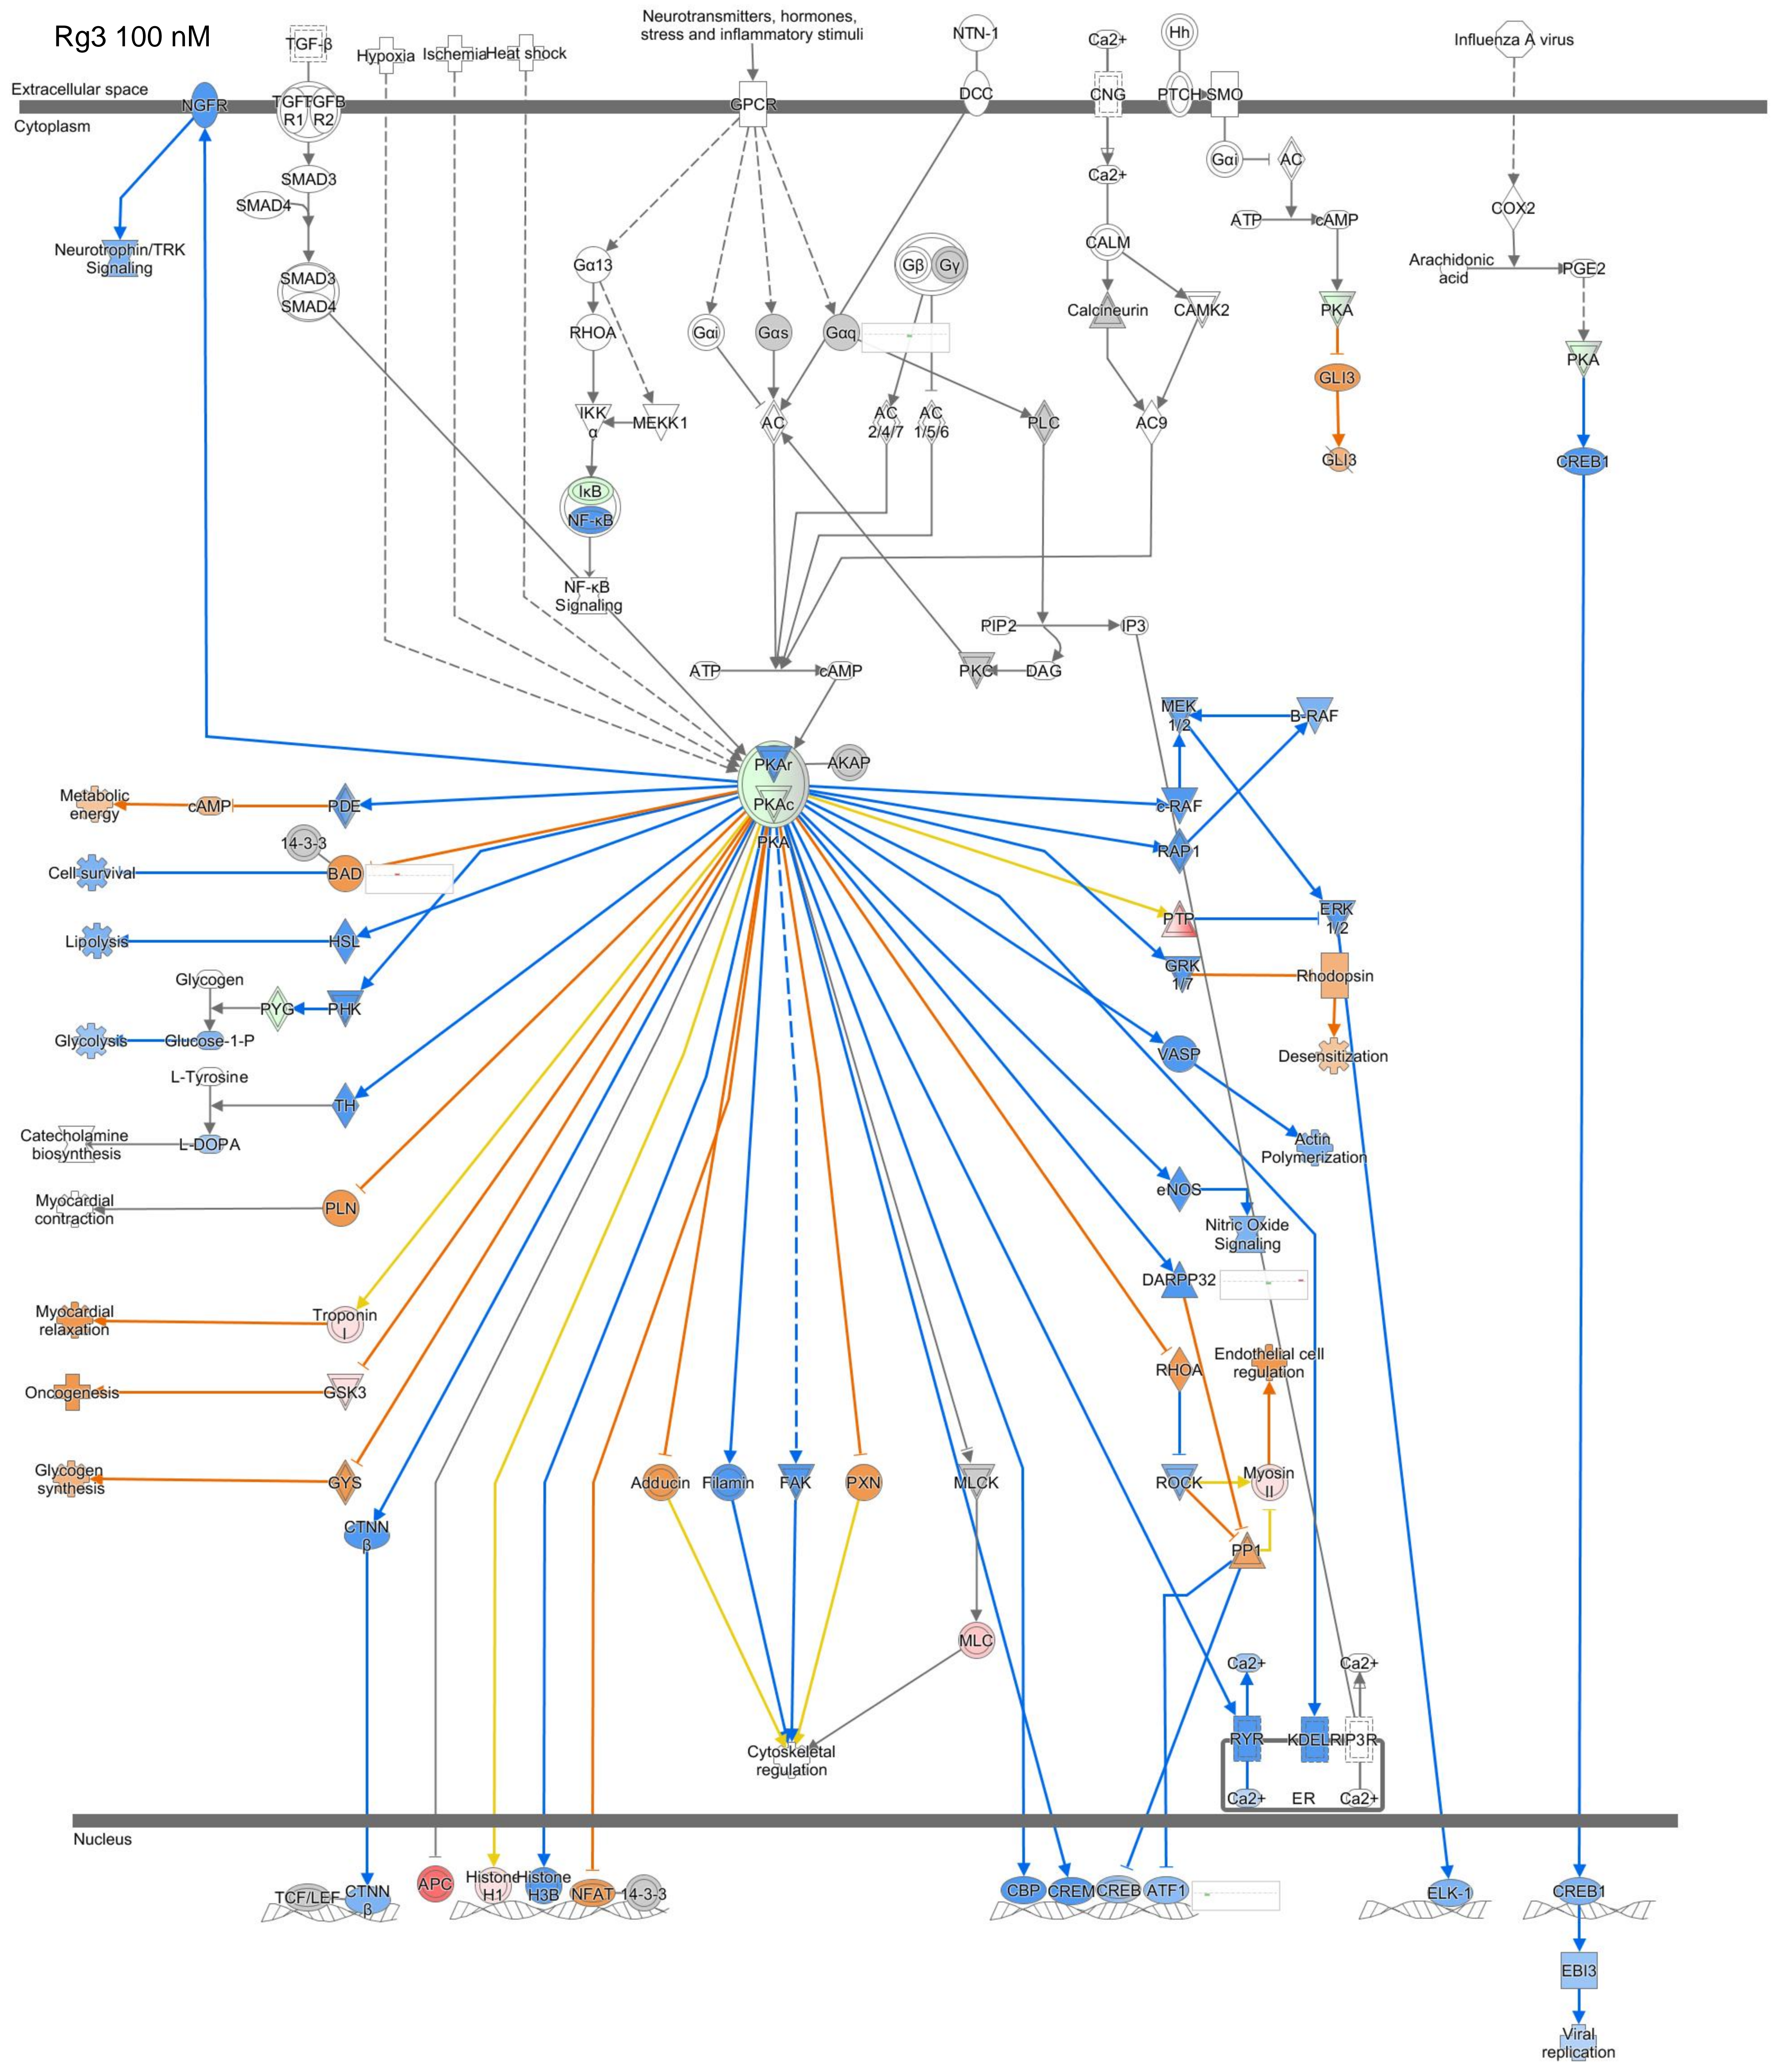



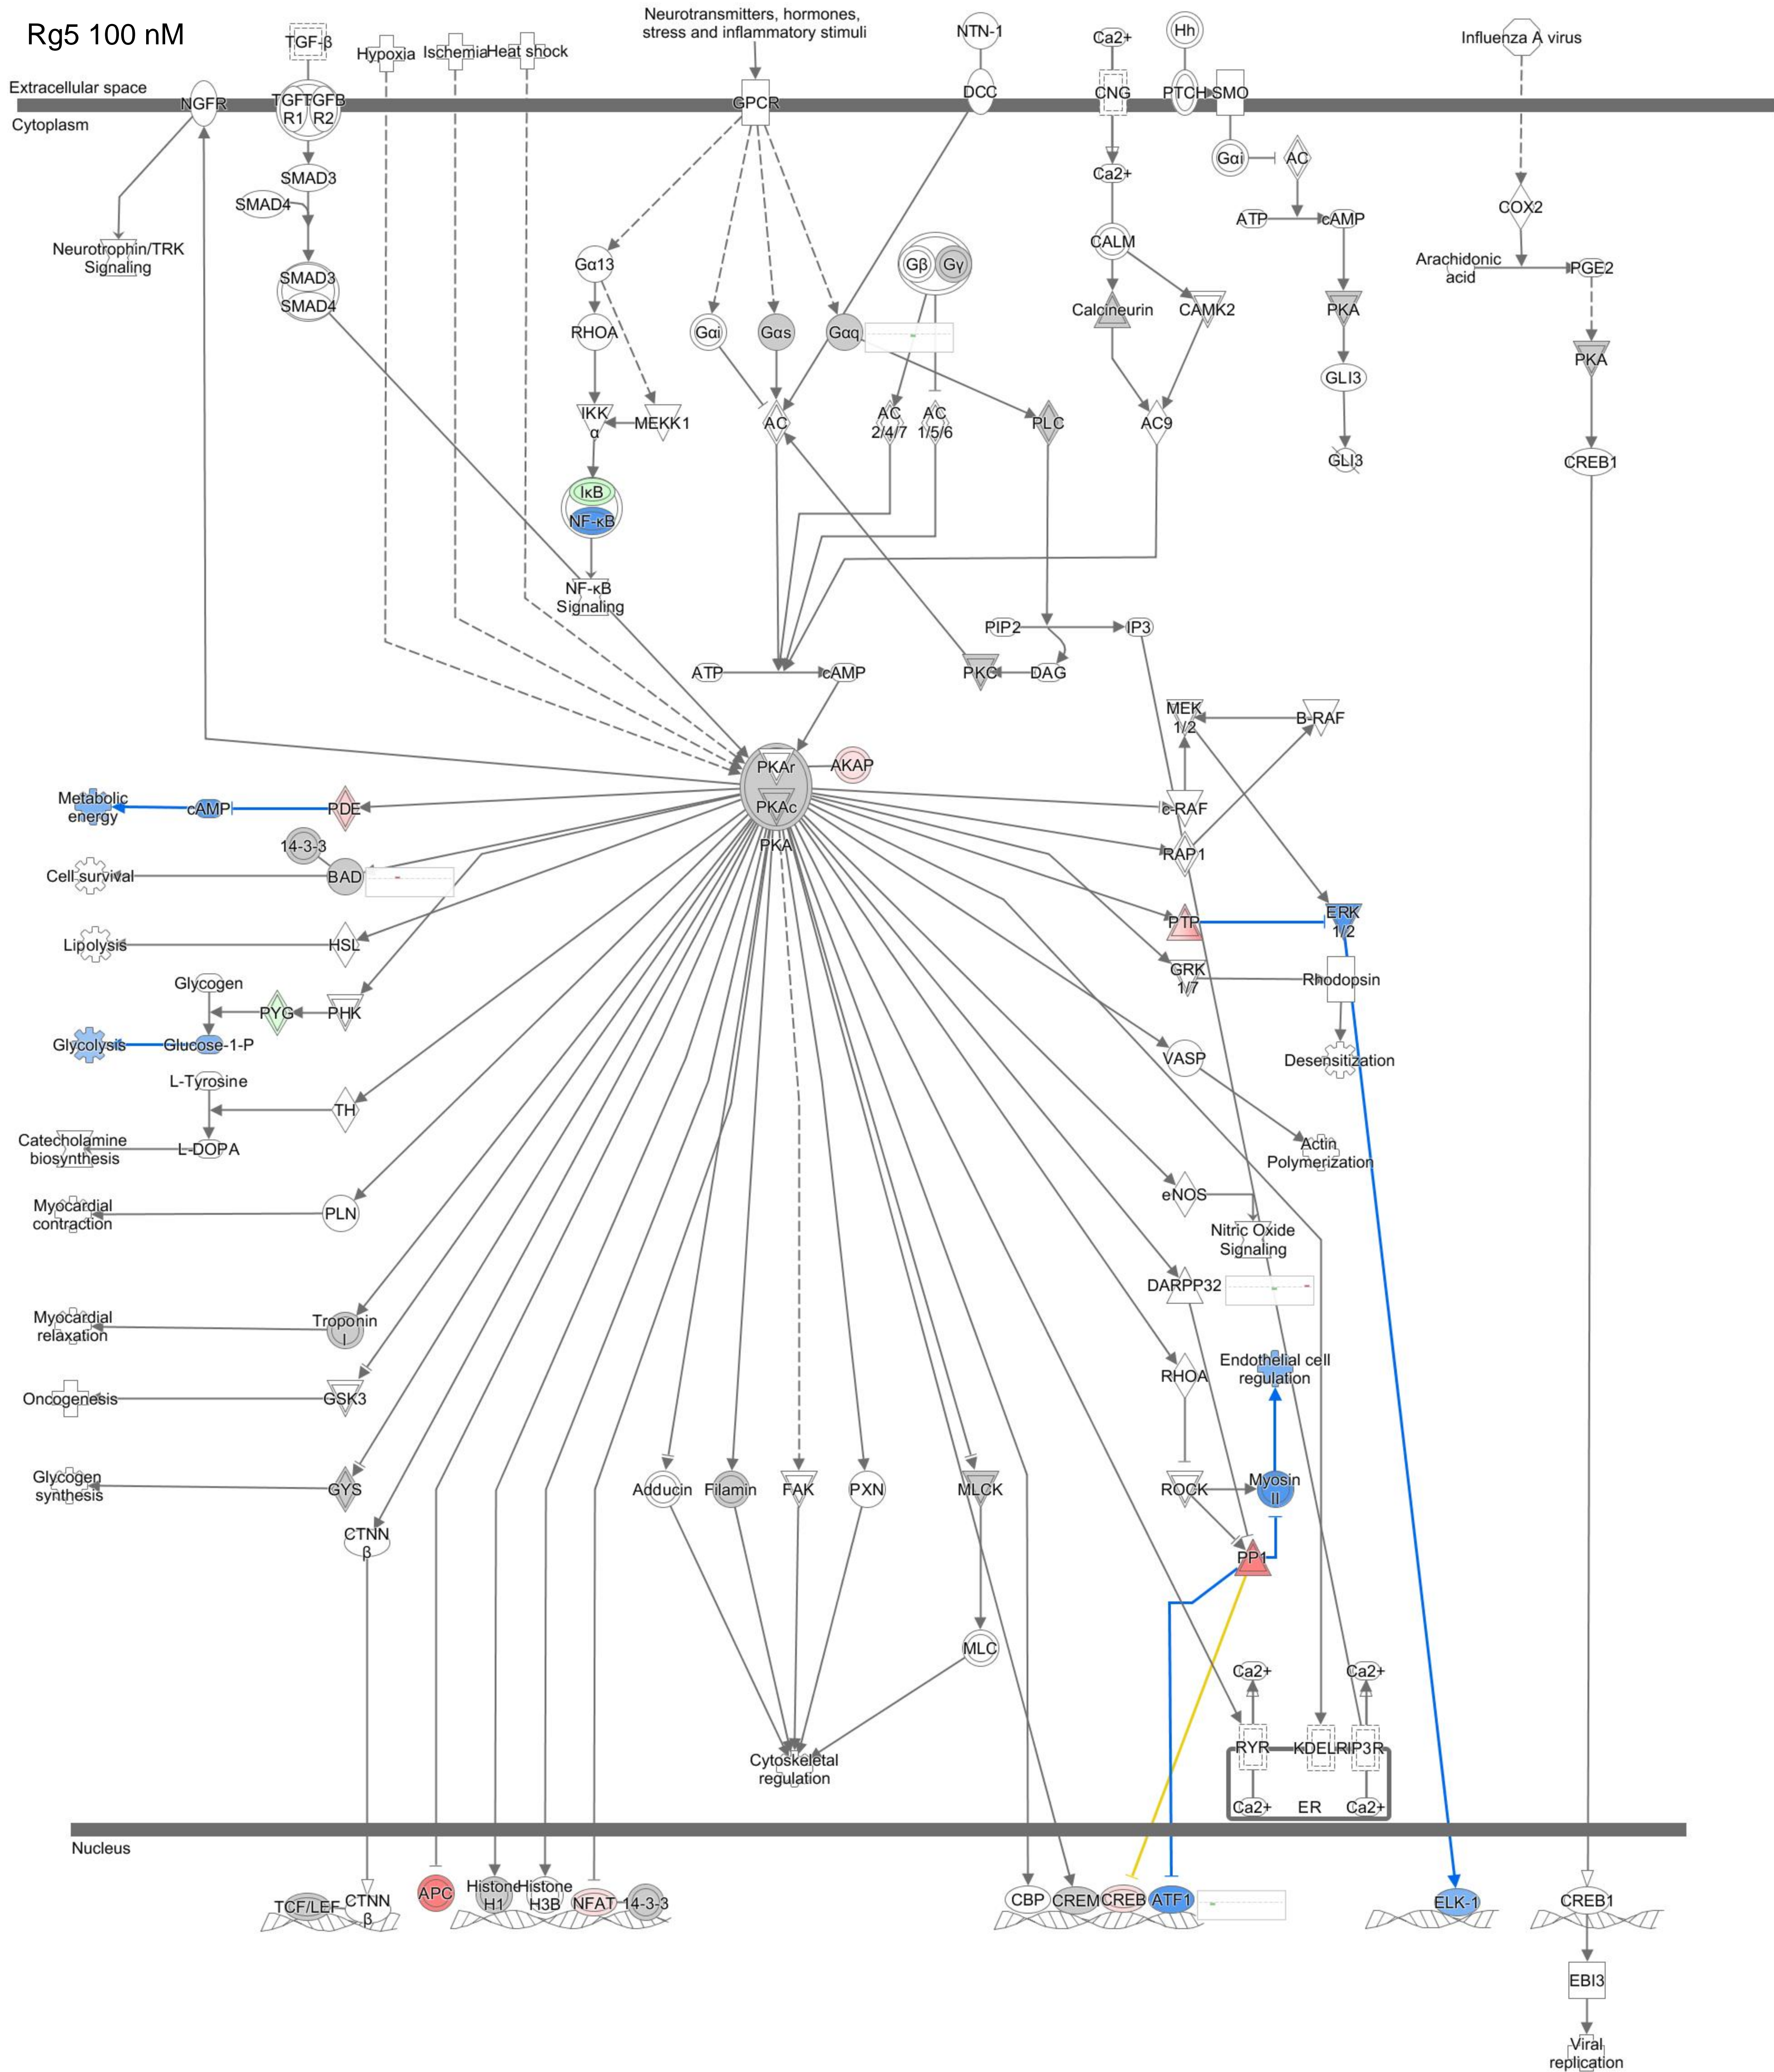



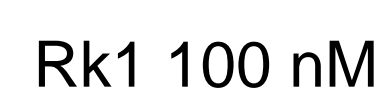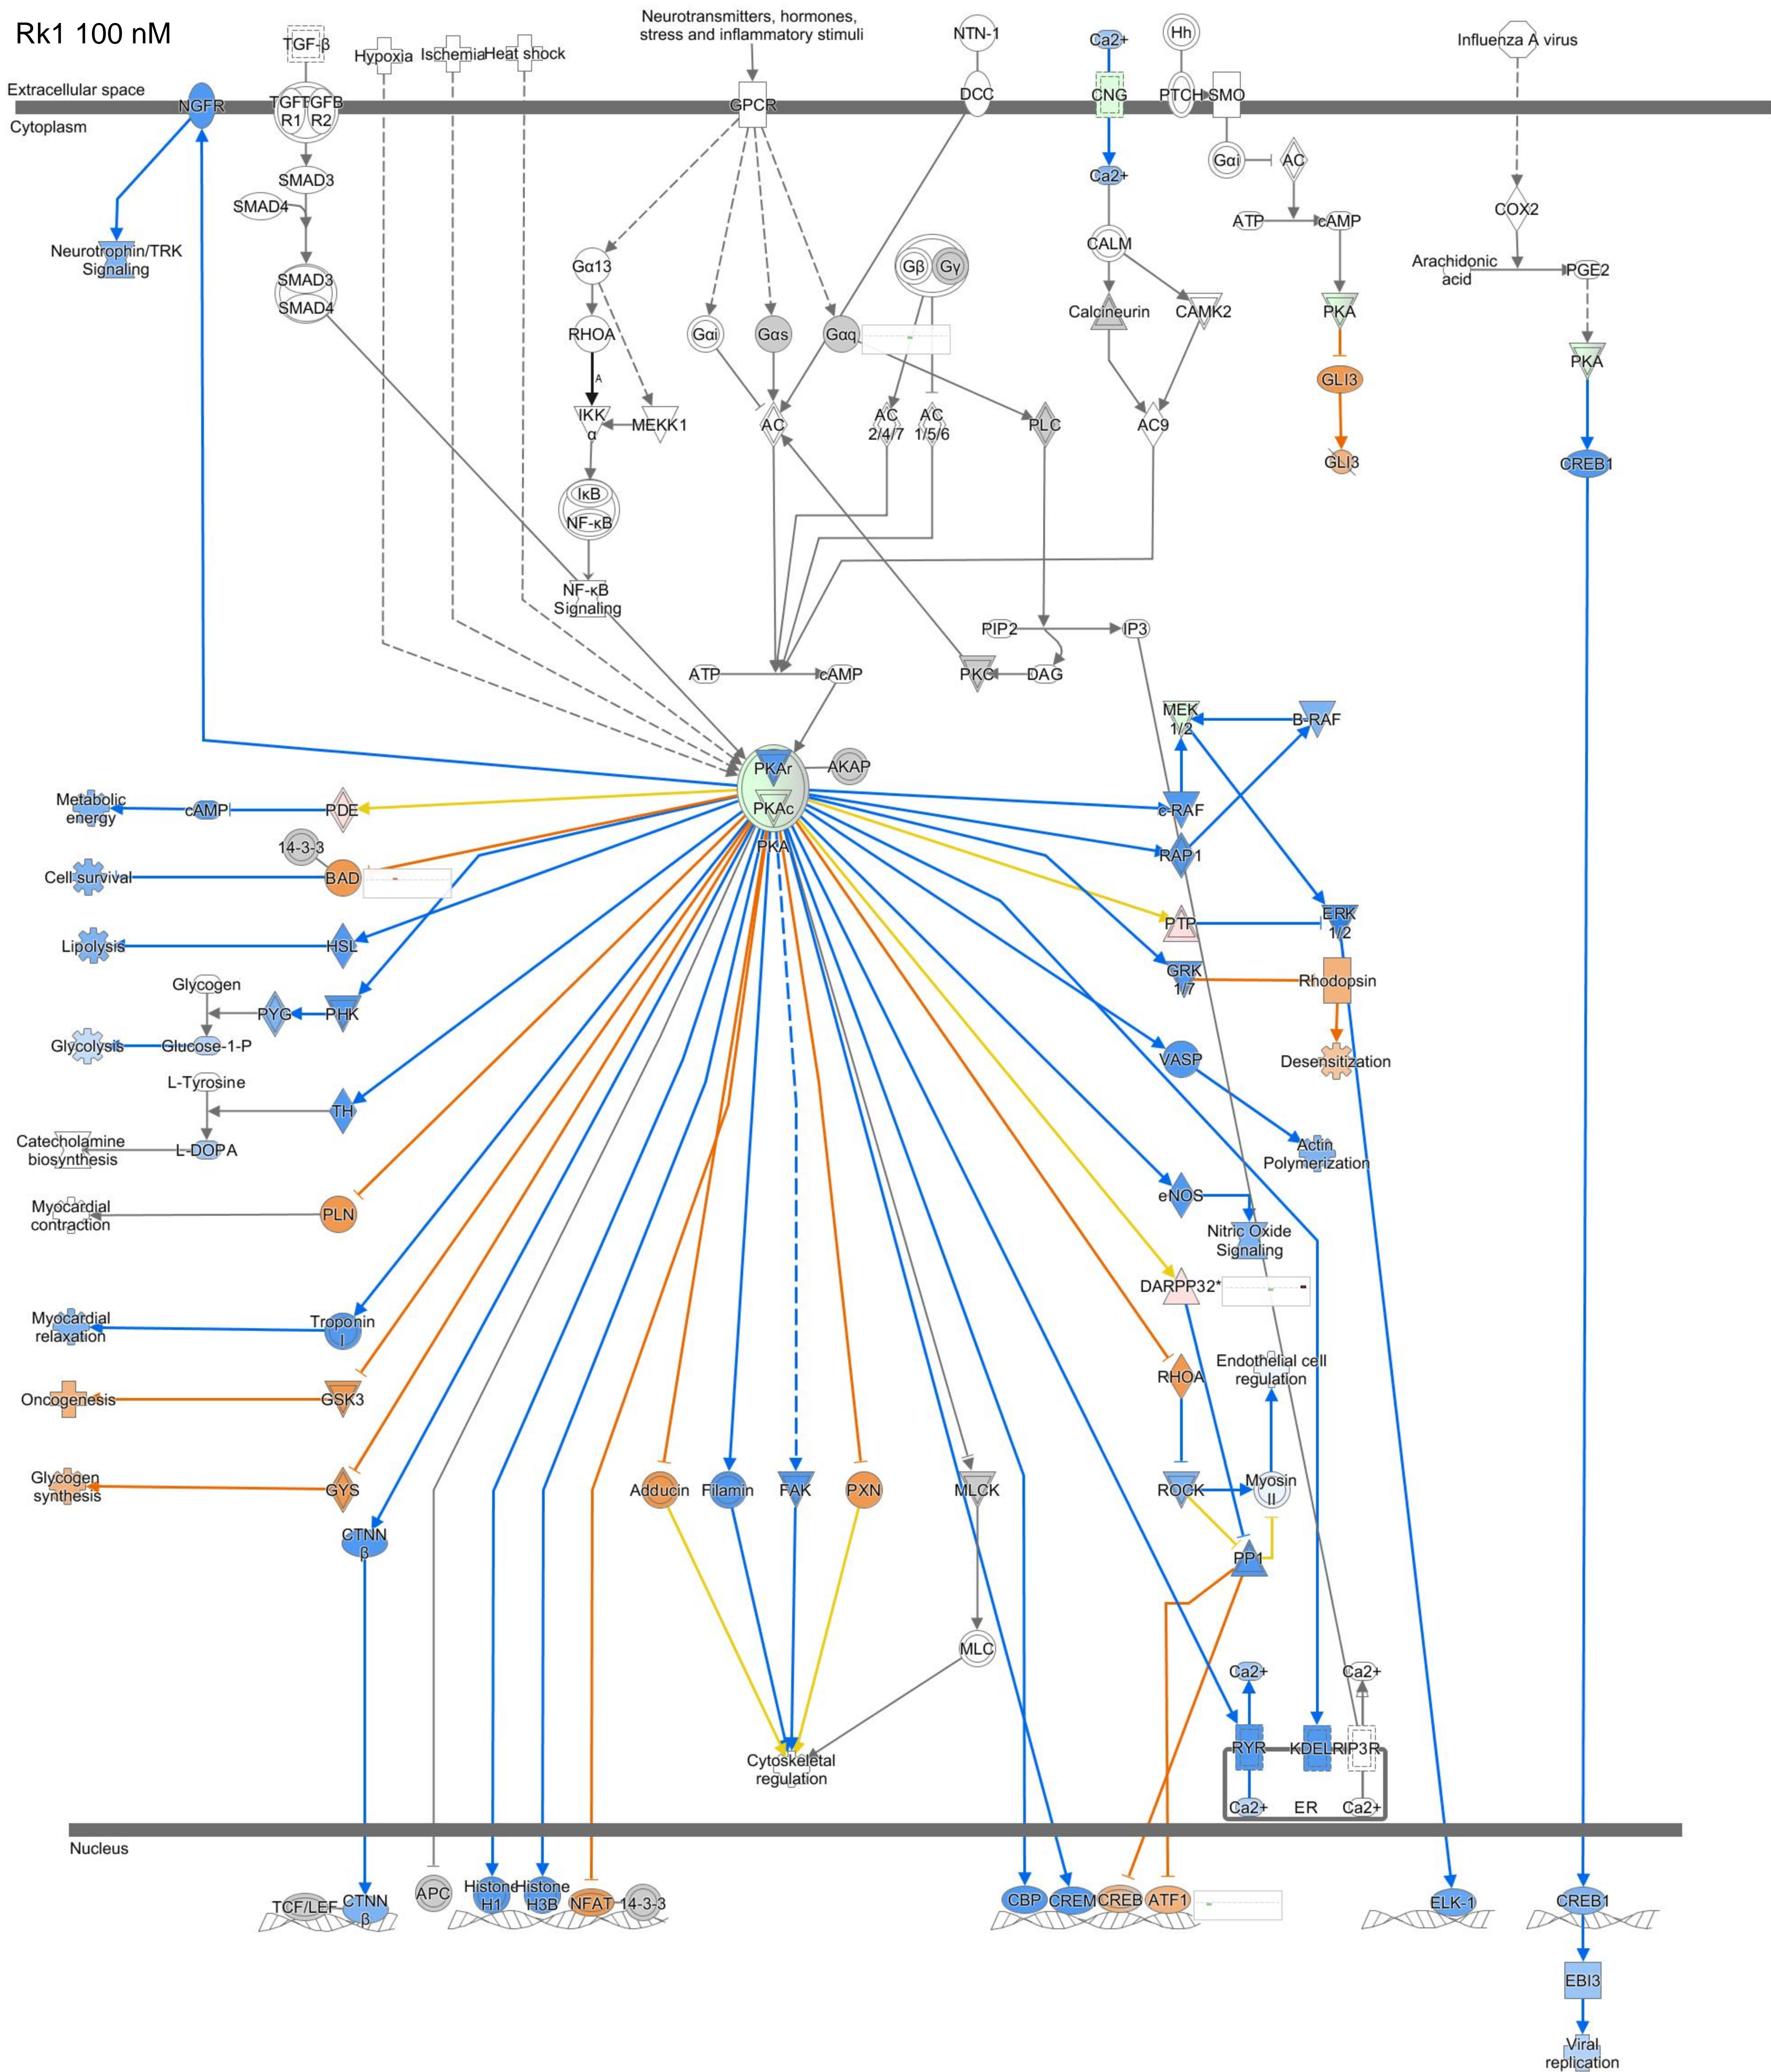

Supplement: Supplementary file 9 [file supplementary]
